# Supplementary material for: The prediction of early preeclampsia: Results from a longitudinal proteomics study
Source: PubMed Central journal article supplement (PMC6548389; doi:10.1371/journal.pone.0217273), 2019-06-04

Group control PE

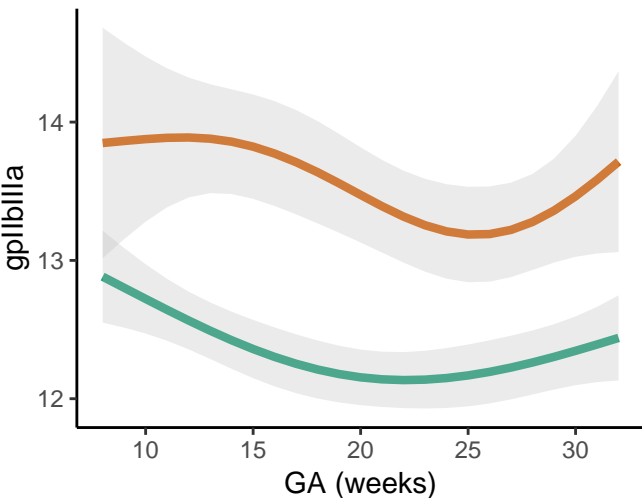

Group control mild PE severe PE

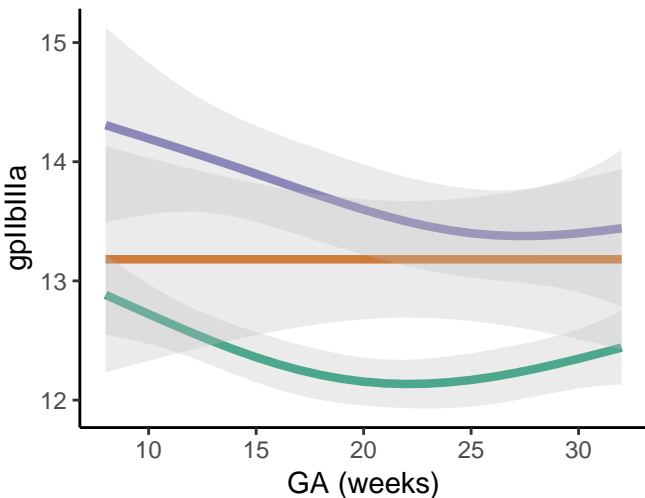

Group control MVM no MVM

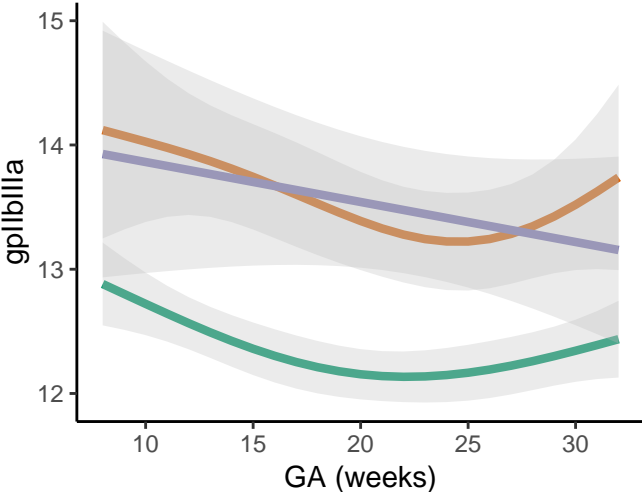

Group control PE

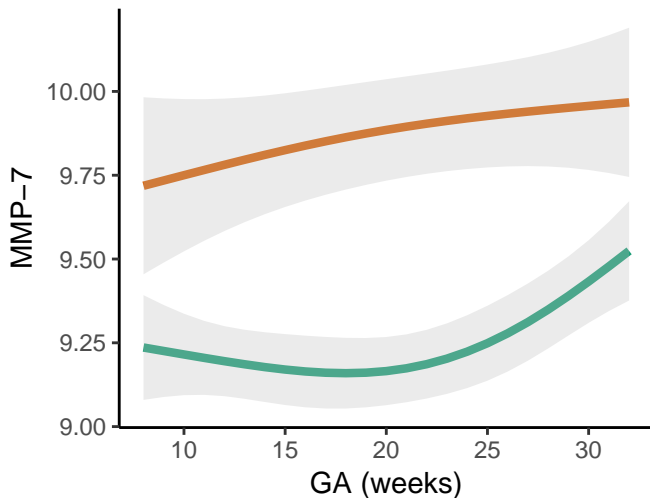

Group control mild PE severe PE

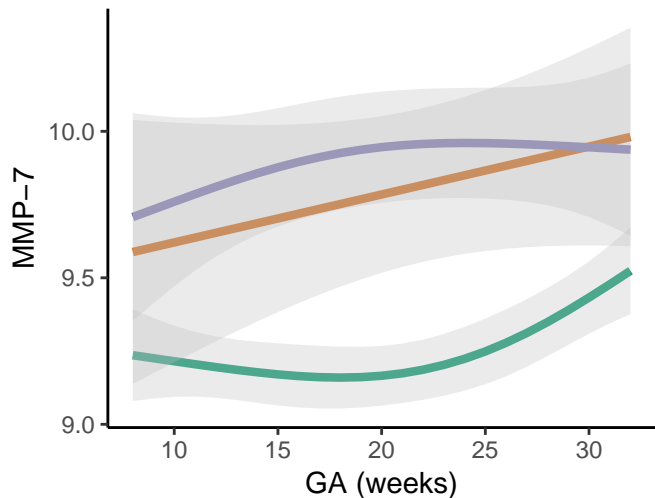

Group control MVM no MVM

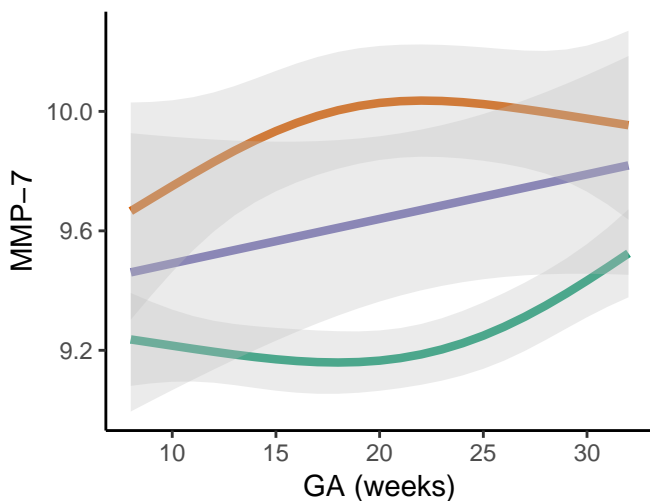

Group control PE

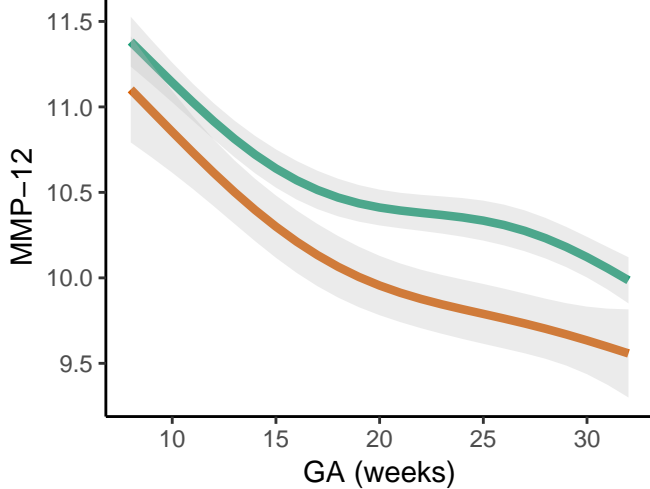

Group control mild PE severe PE

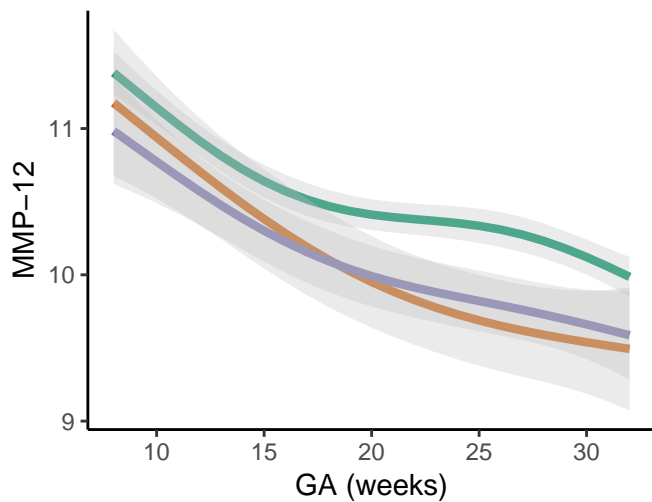

Group control MVM no MVM

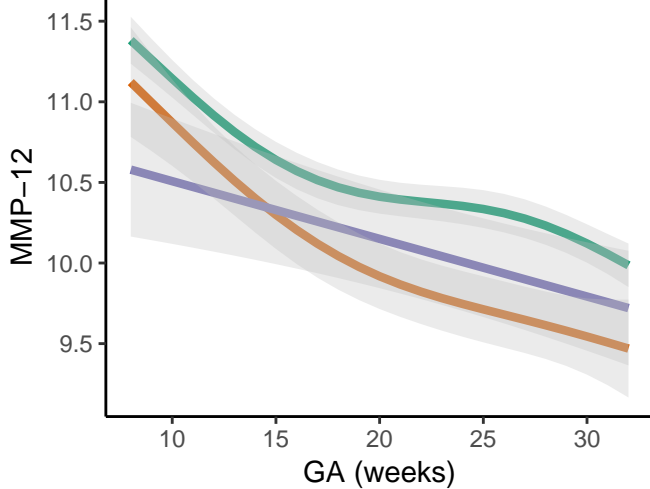

Group control PE

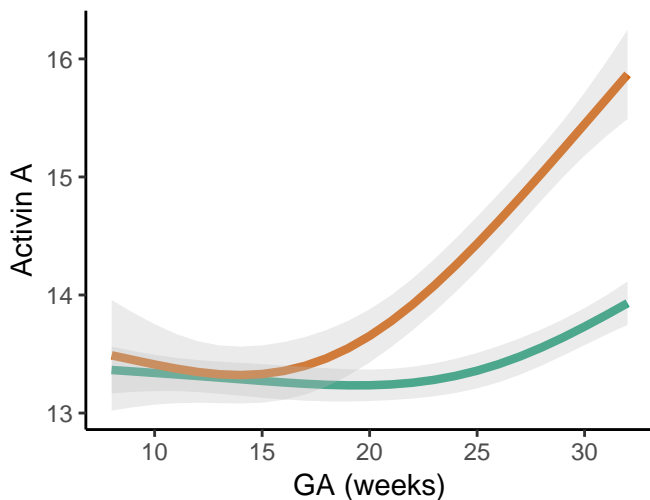

Group control mild PE severe PE

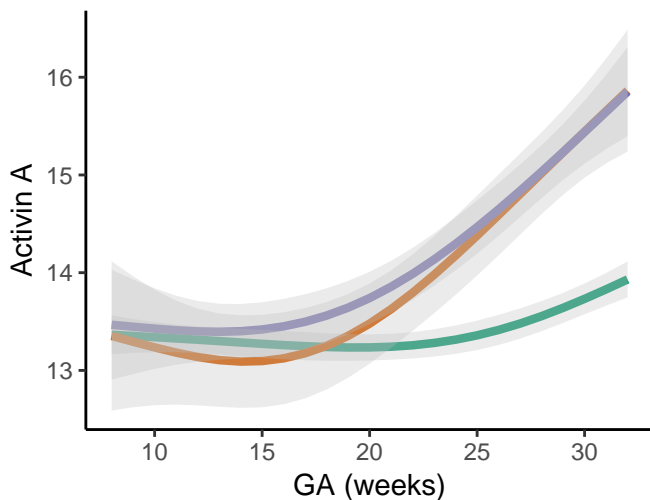

Group control MVM no MVM

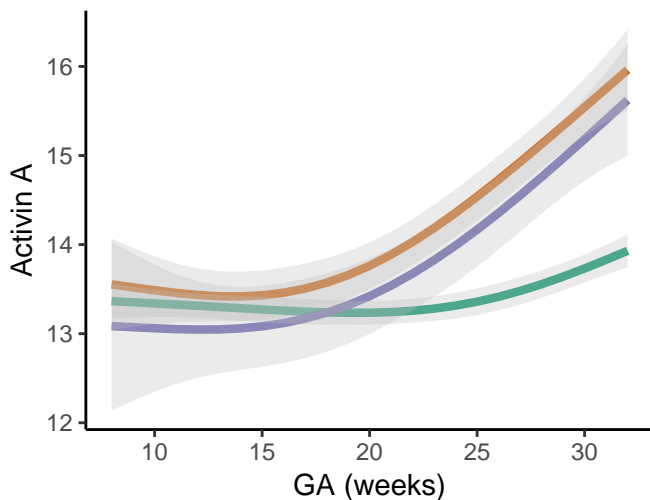

Group control PE

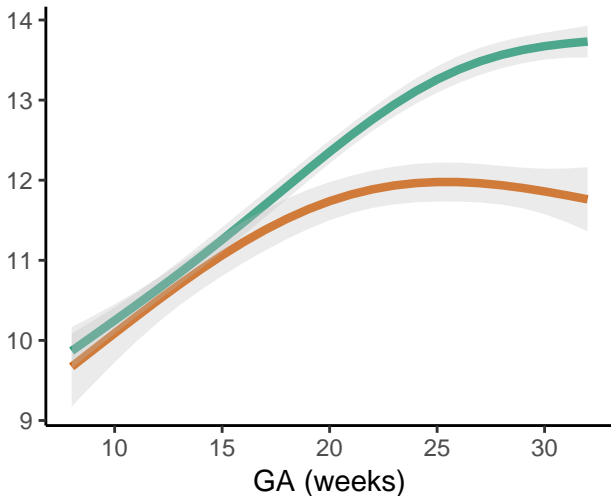

Group control mild PE severe PE

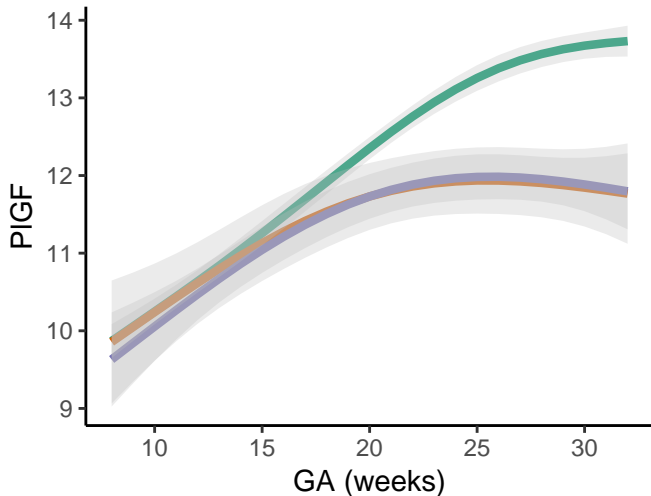

Group control MVM no MVM

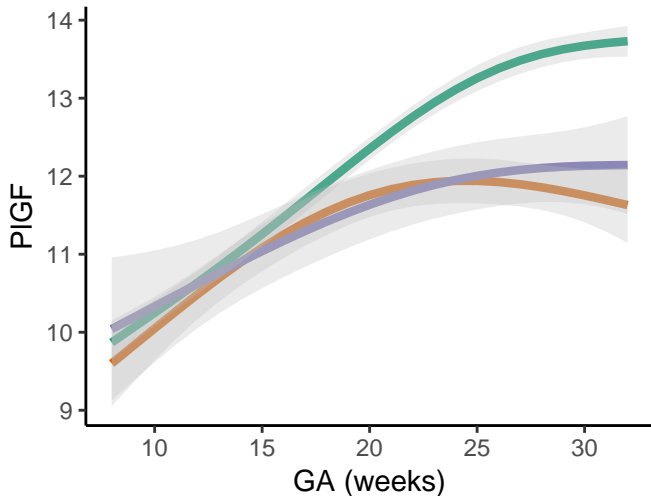

Group control PE

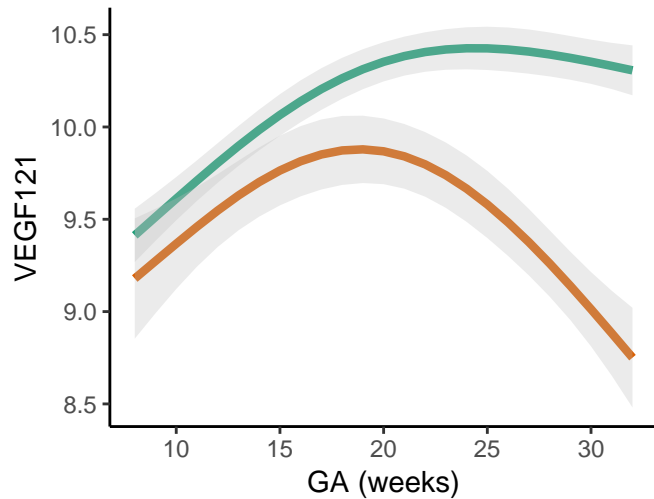

Group control mild PE severe PE

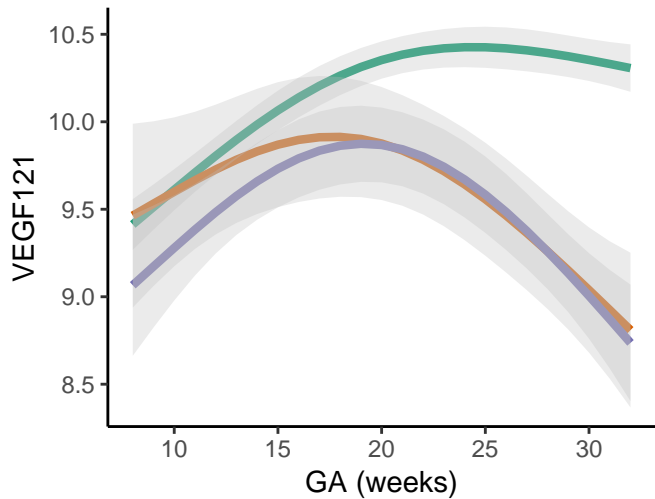

Group control MVM no MVM

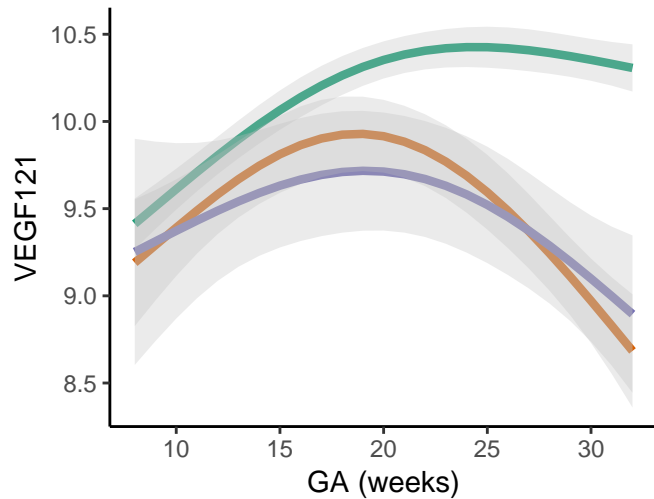

Group control PE

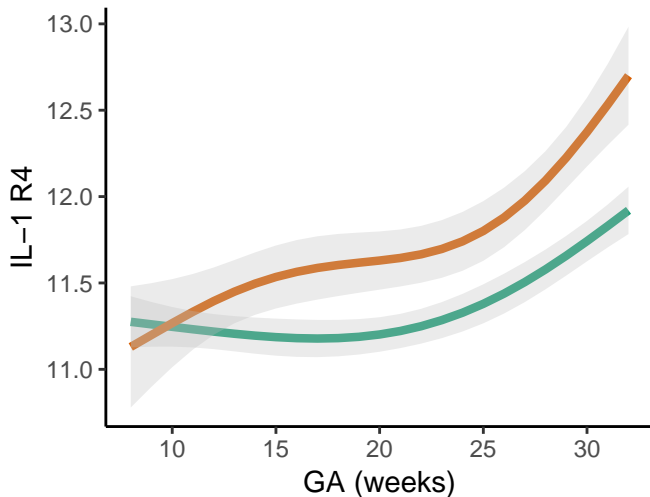

Group control mild PE severe PE

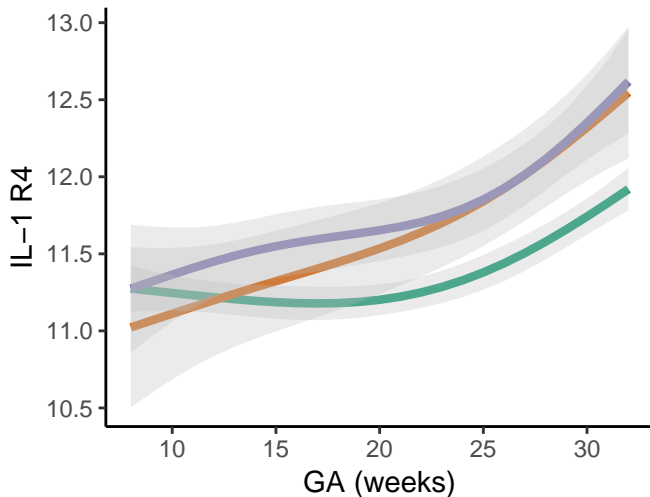

Group control MVM no MVM

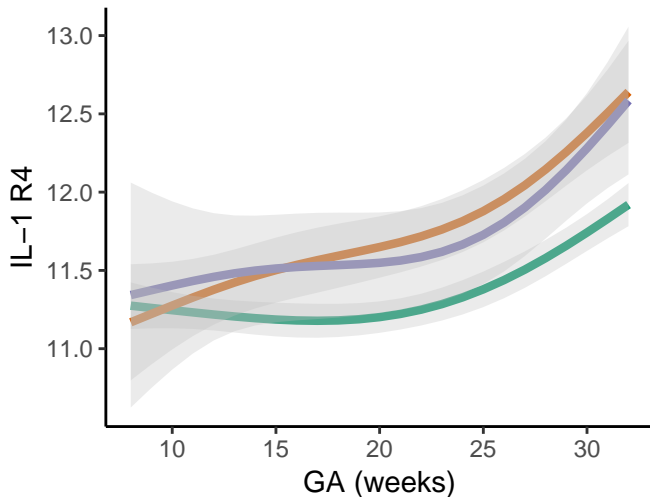

Group control PE

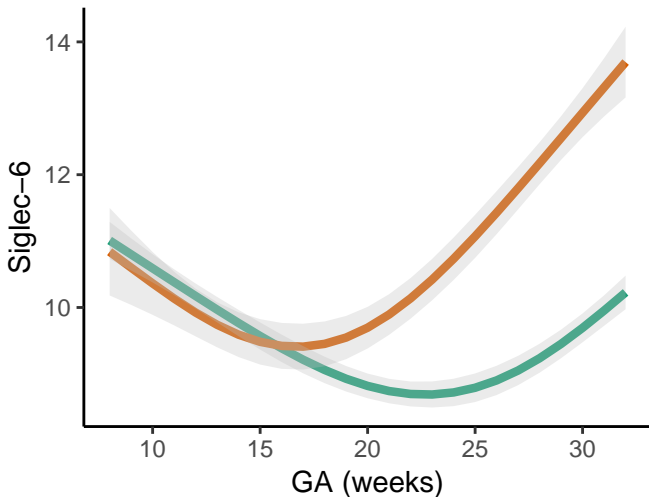

Group control mild PE severe PE

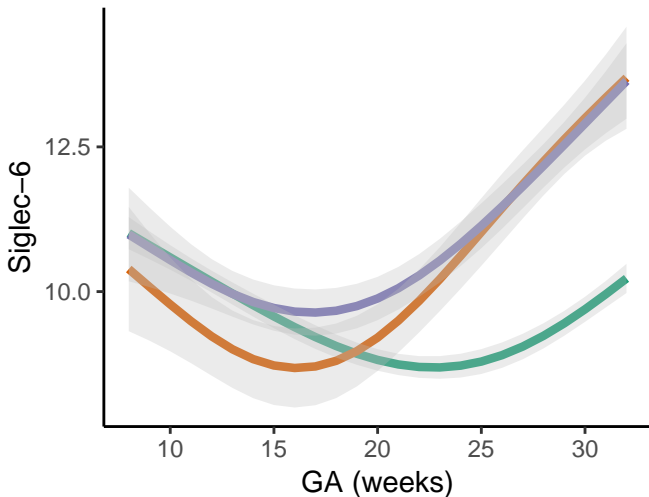

Group control MVM no MVM

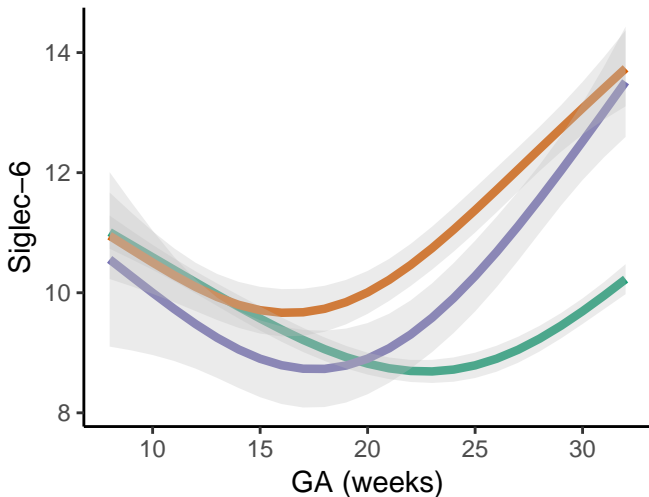



Group control PE

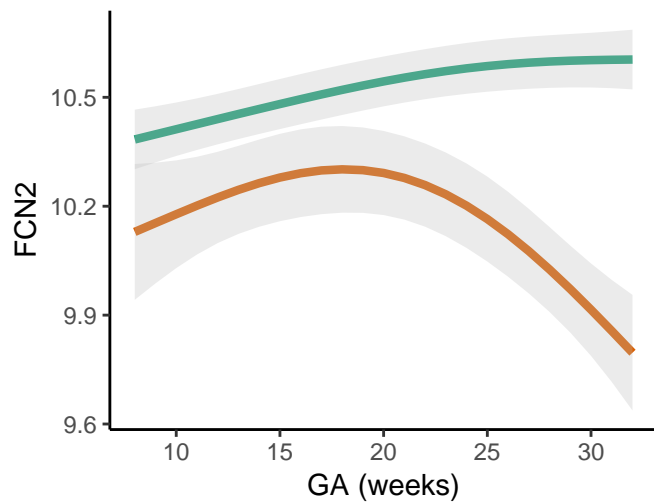

Group control mild PE severe PE

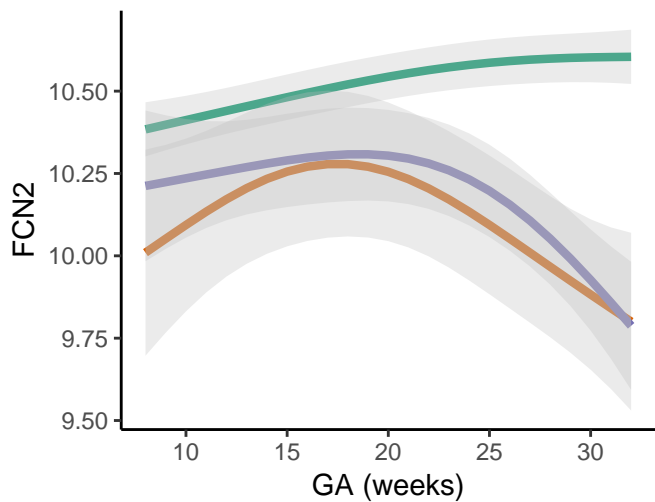

Group control MVM no MVM

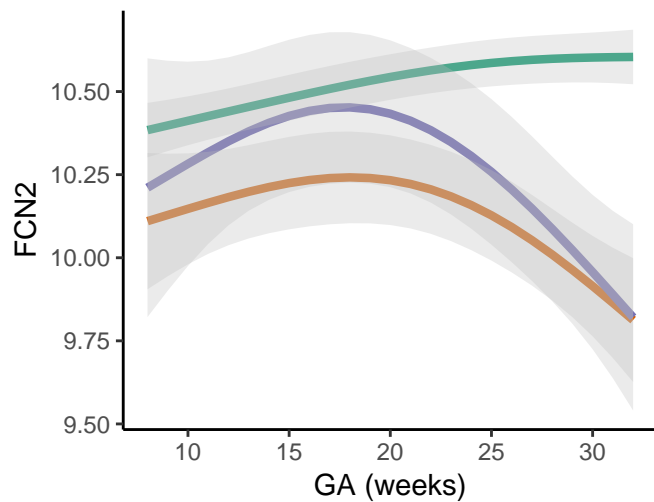

Group control PE

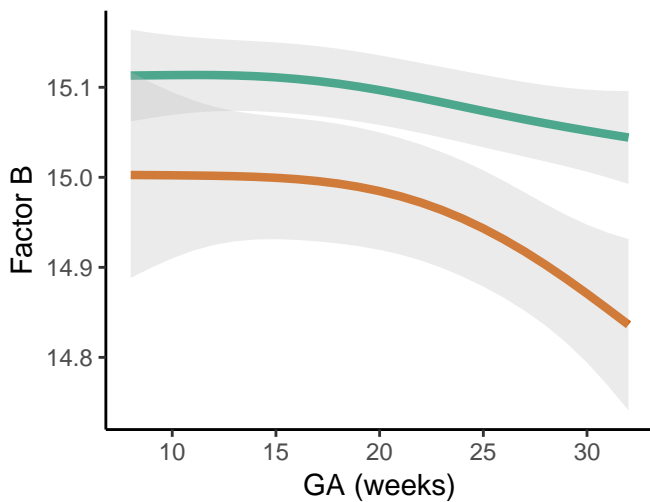

Group control mild PE severe PE

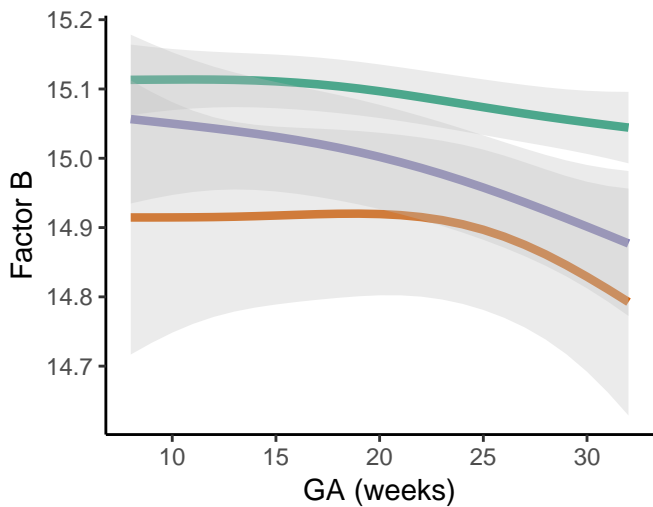

Group control MVM no MVM

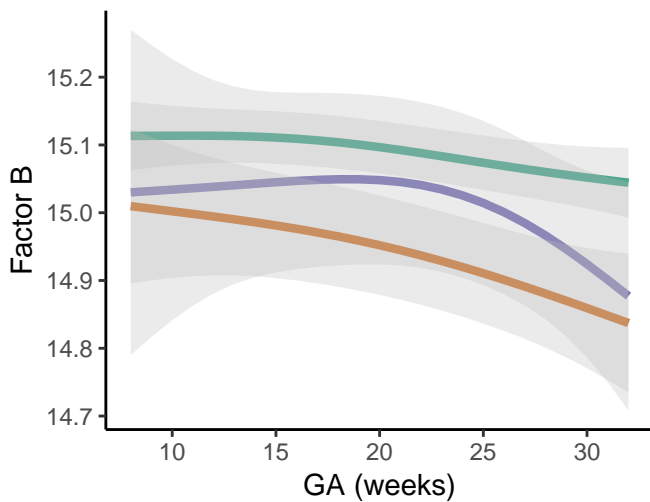

Group control PE

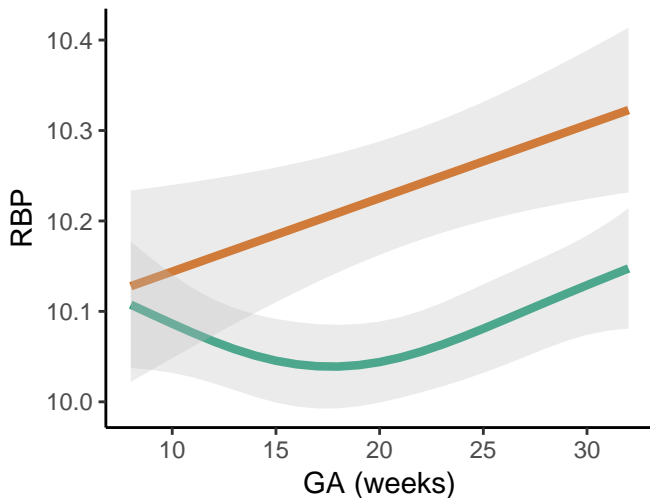

Group control mild PE severe PE

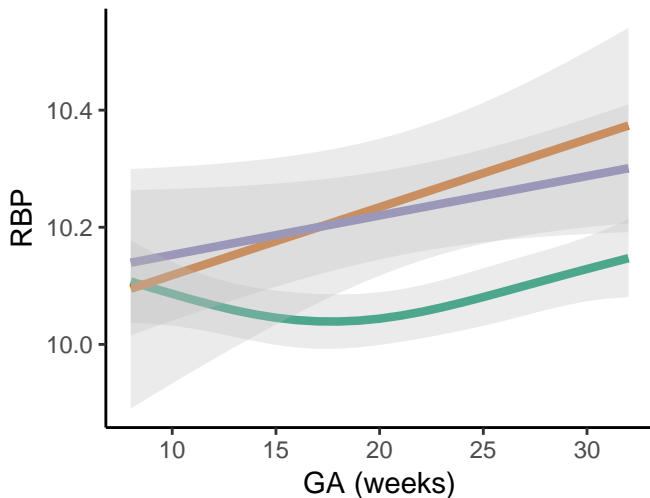

Group control MVM no MVM

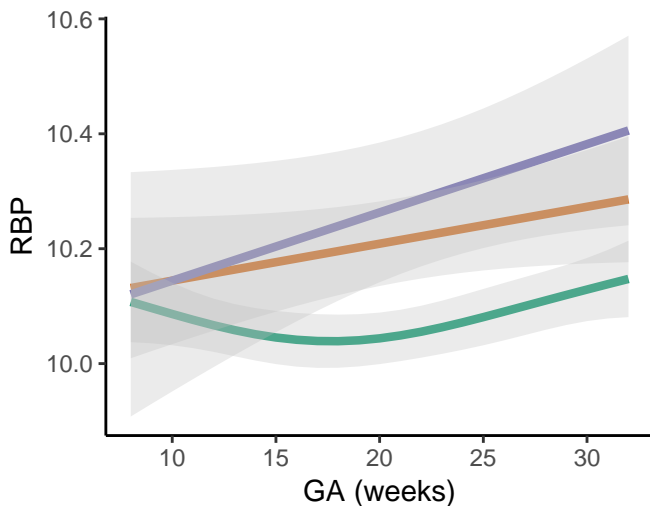

Group control PE

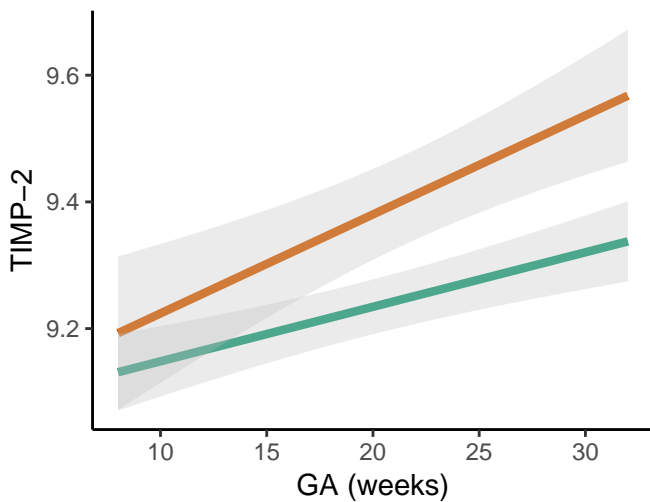

Group control mild PE severe PE

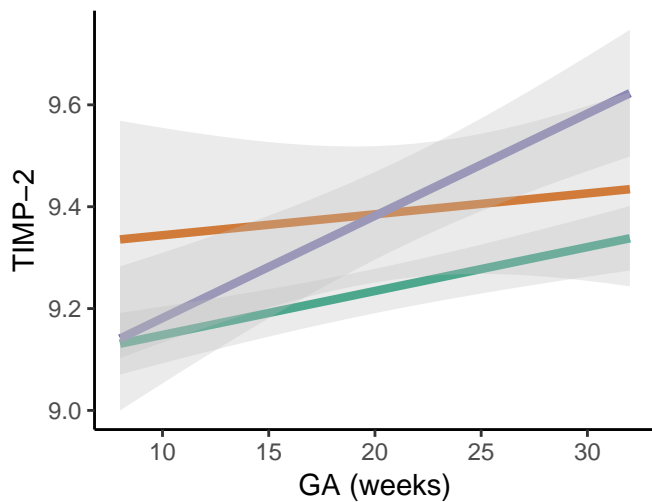

Group control MVM no MVM

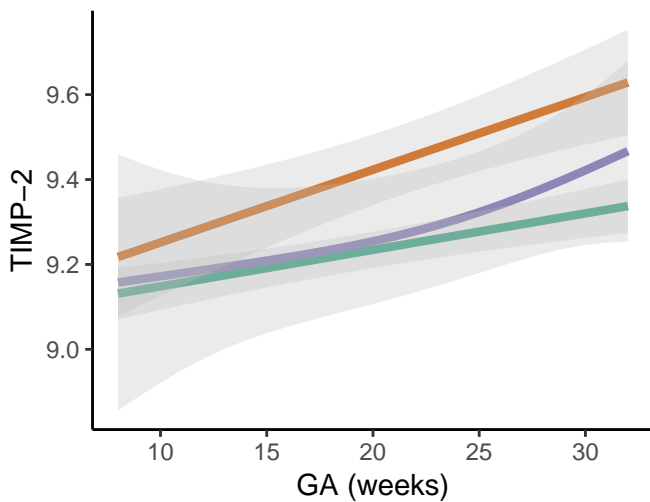

Group control PE

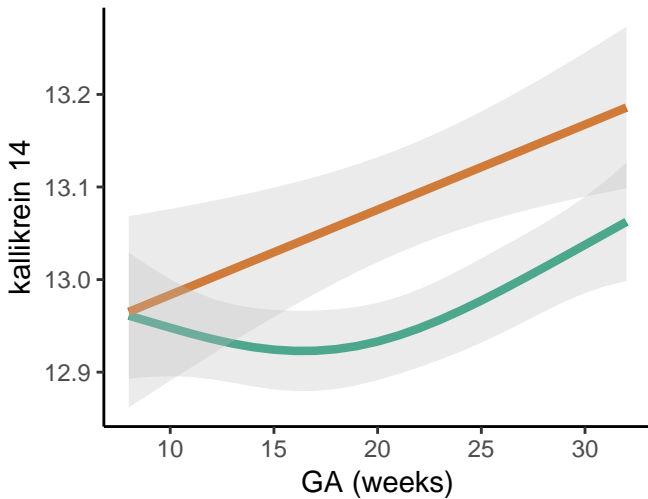

Group control mild PE severe PE

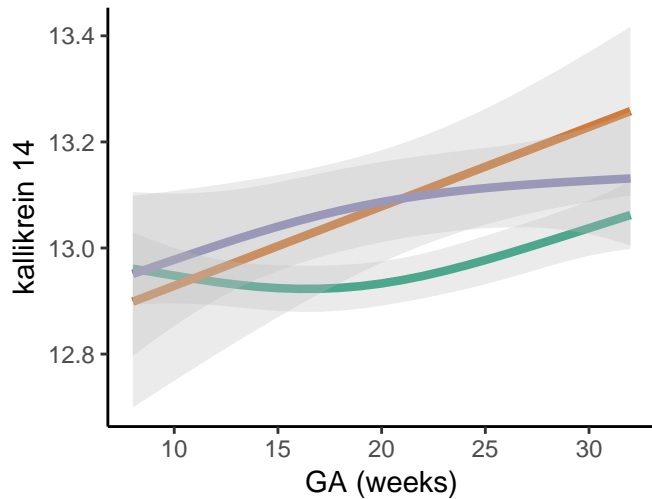

Group control MVM no MVM

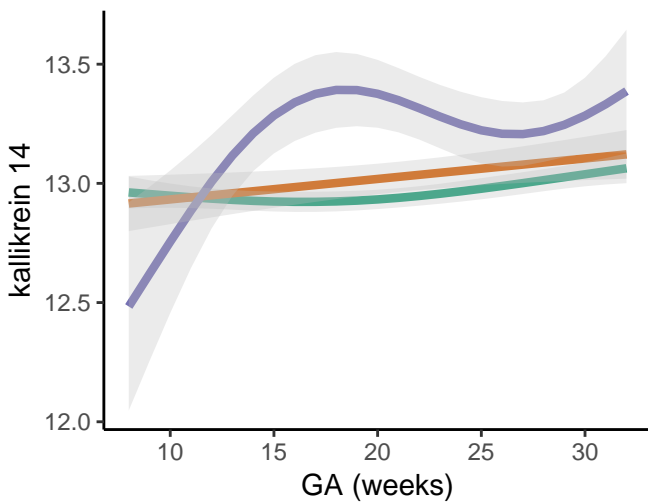

Group control PE

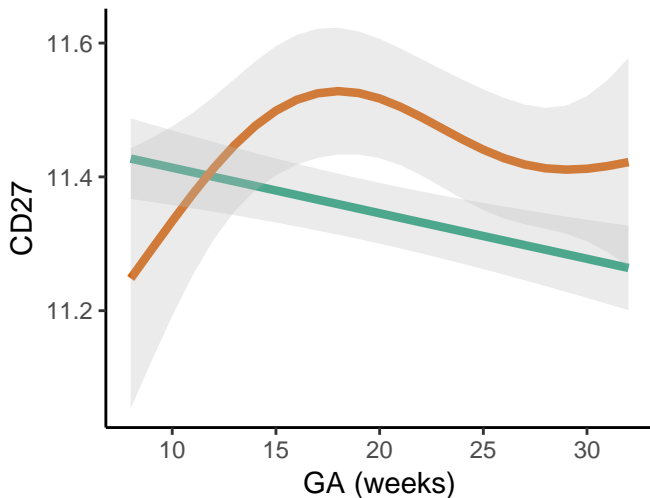

Group control mild PE severe PE

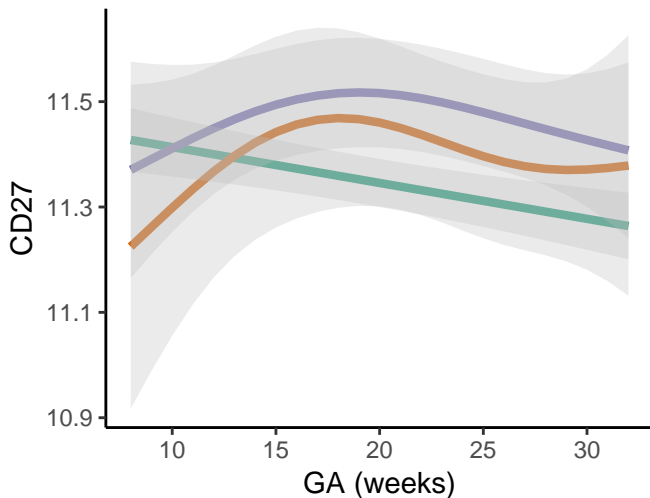

Group control MVM no MVM

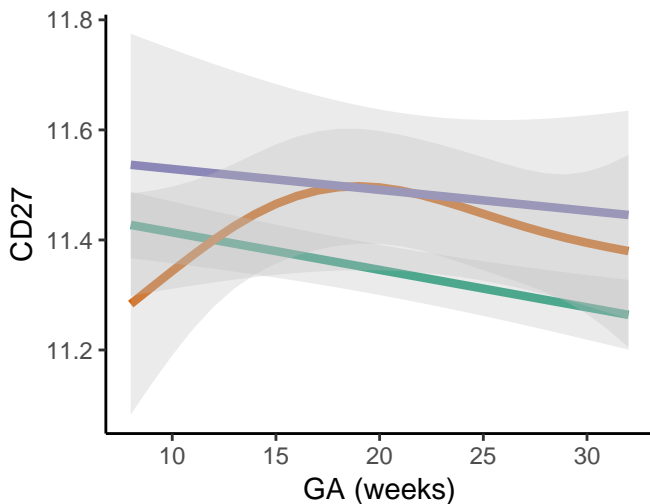

Group control PE

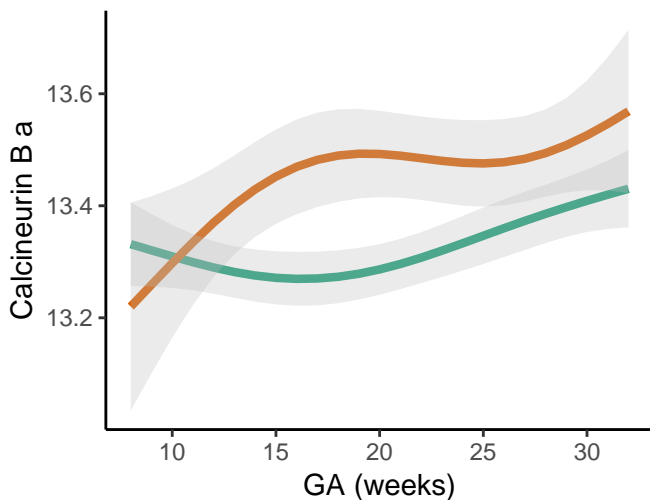

Group control mild PE severe PE

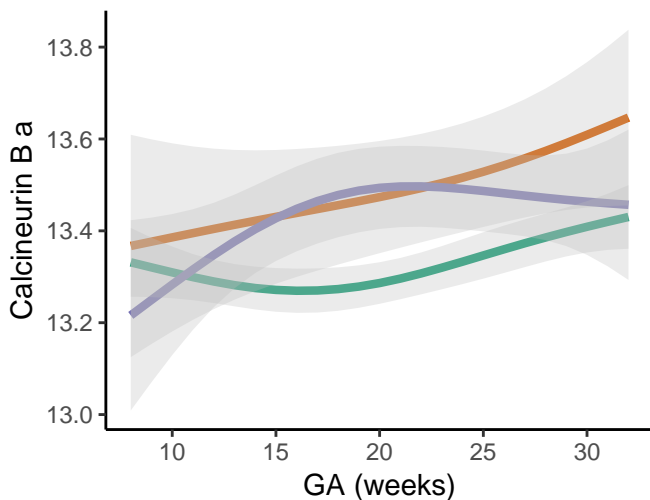

Group control MVM no MVM

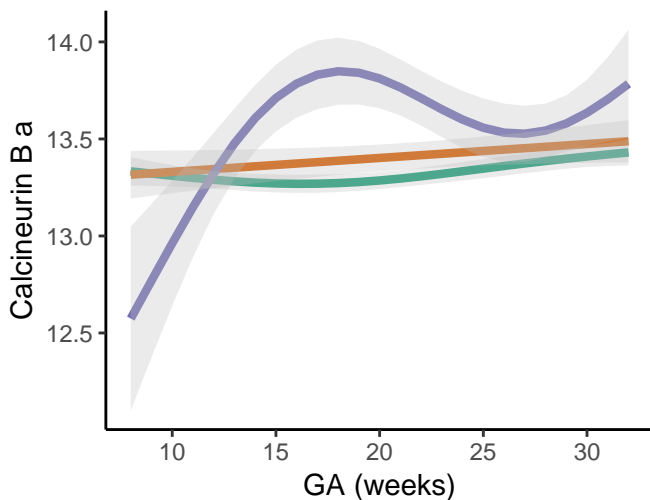

Group control PE

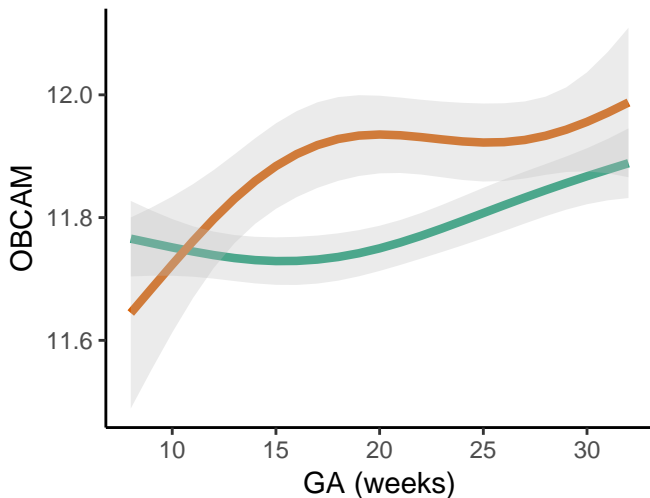

Group control mild PE severe PE

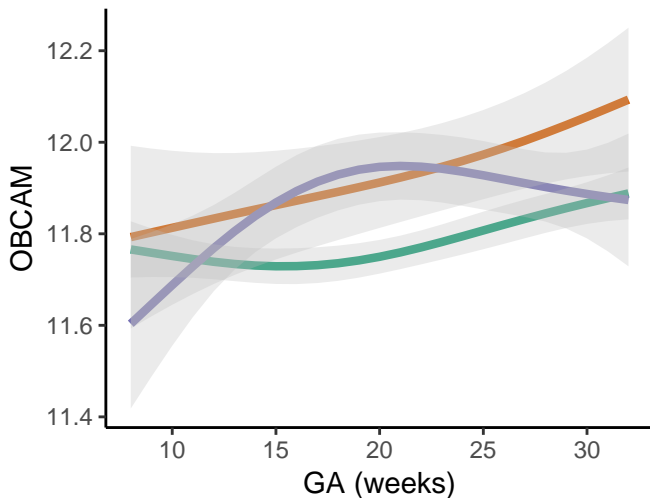

Group control MVM no MVM

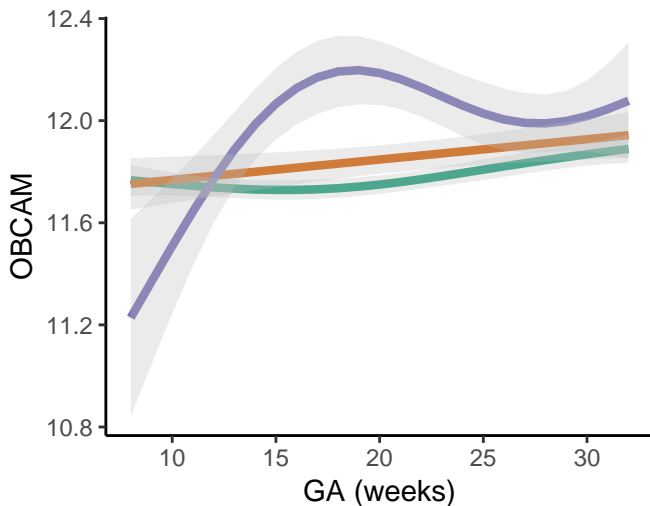



Group control PE

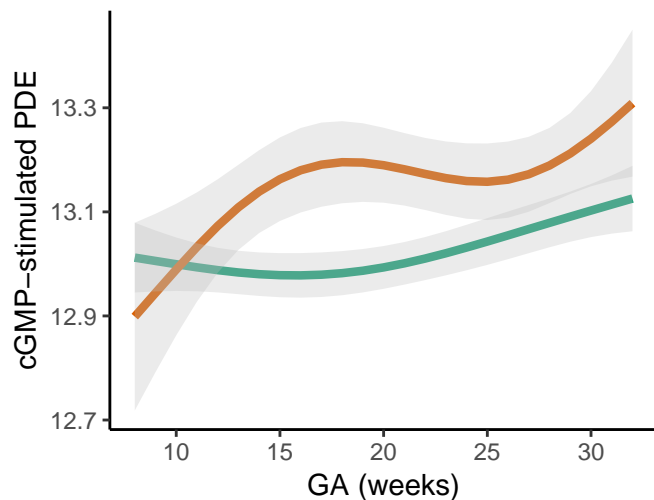

Group control mild PE severe PE

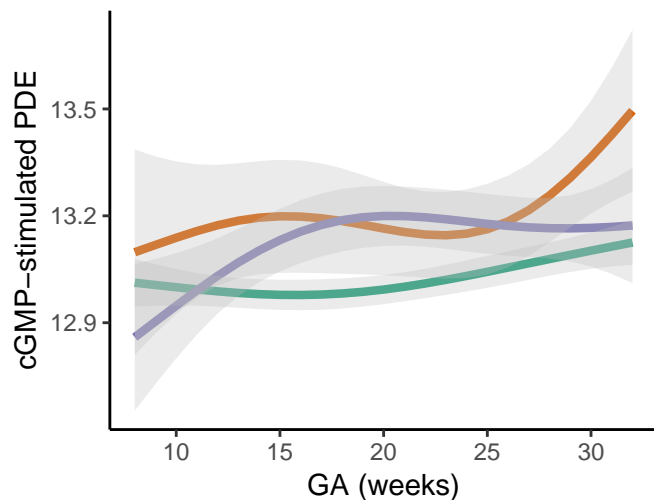

Group control MVM no MVM

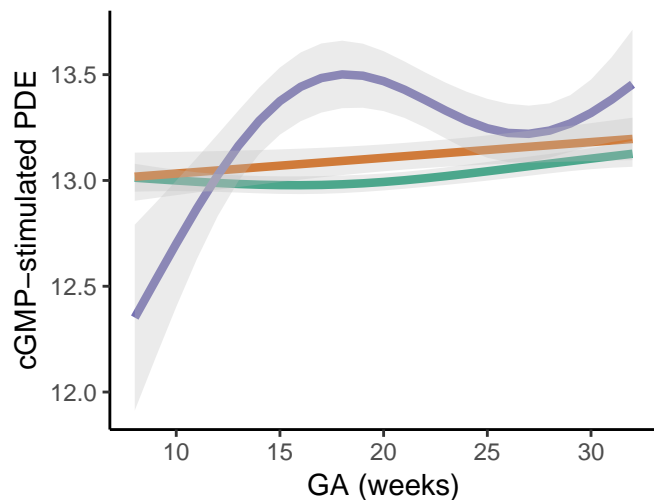

Group control PE

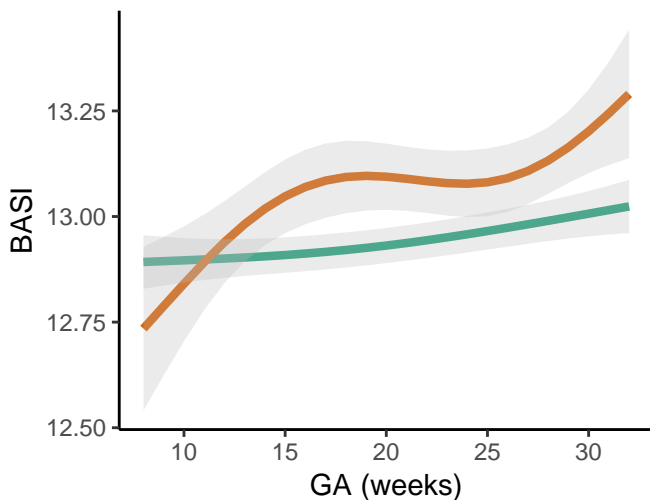

Group control mild PE severe PE

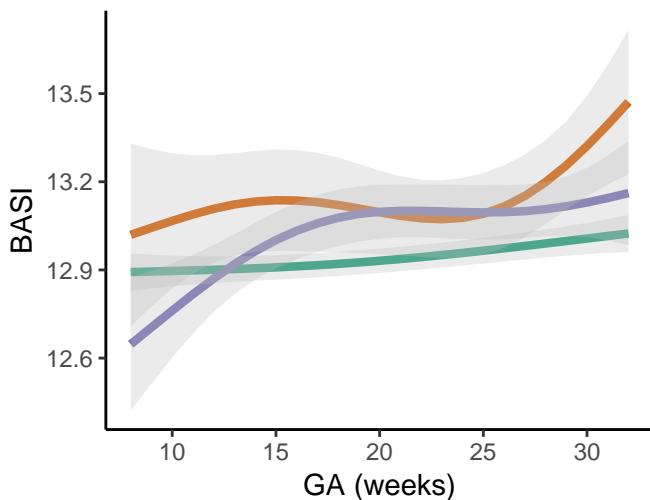

Group control MVM no MVM

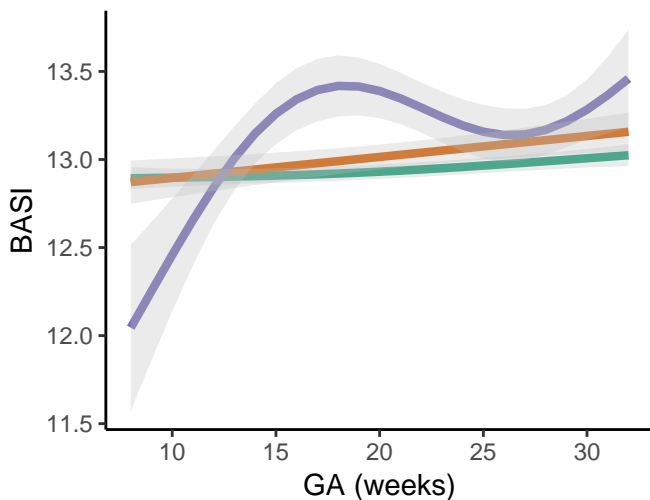

Group control PE

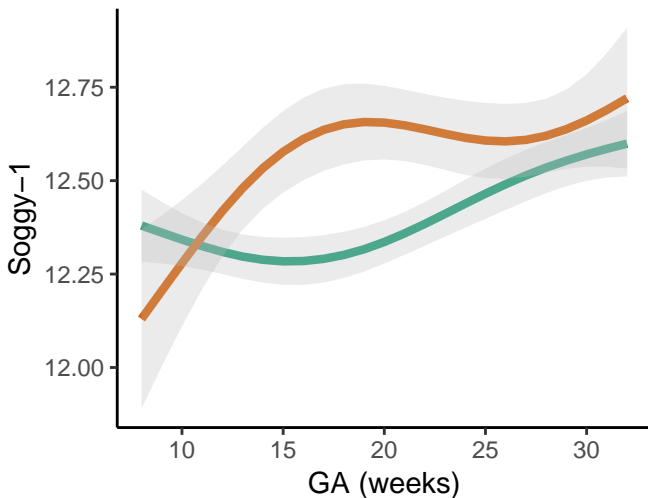

Group control mild PE severe PE

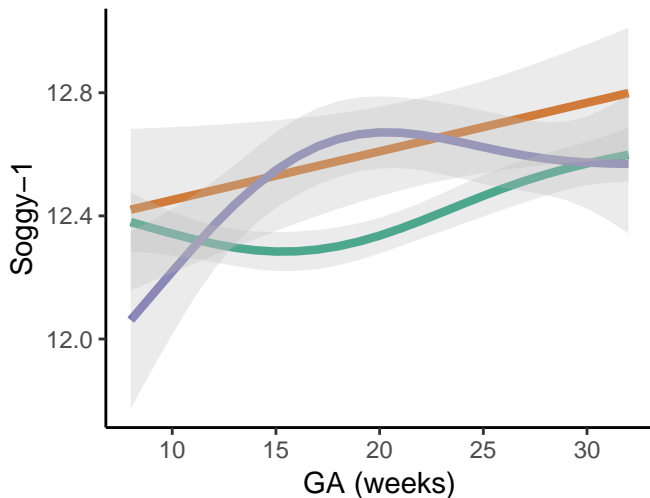

Group control MVM no MVM

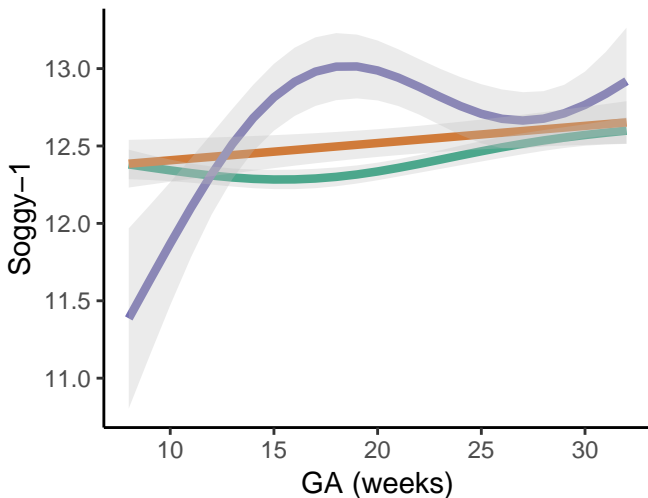

Group control PE

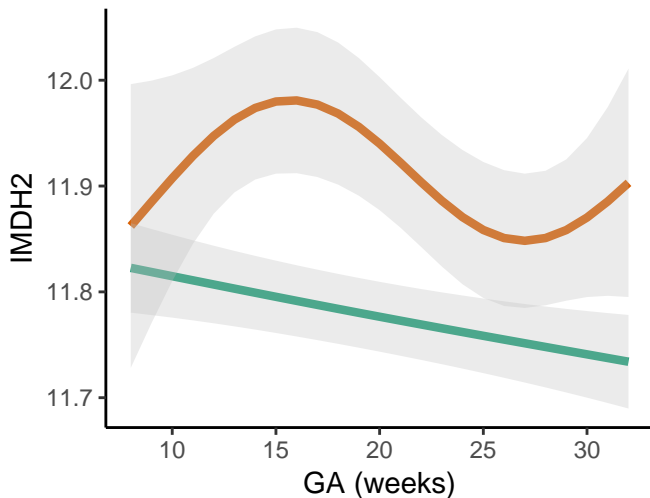

Group control mild PE severe PE

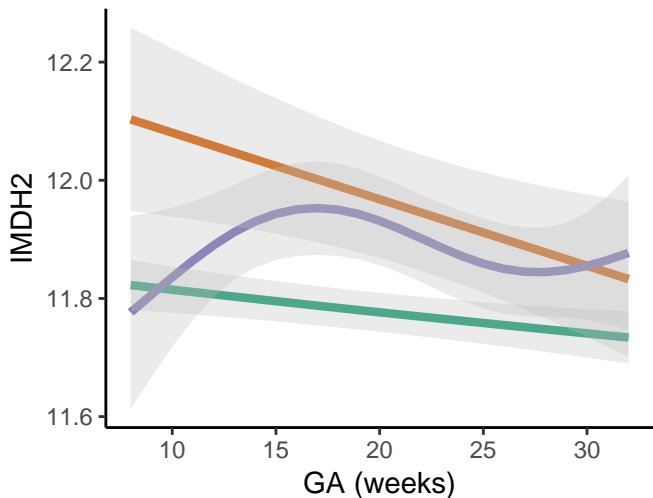

Group control MVM no MVM

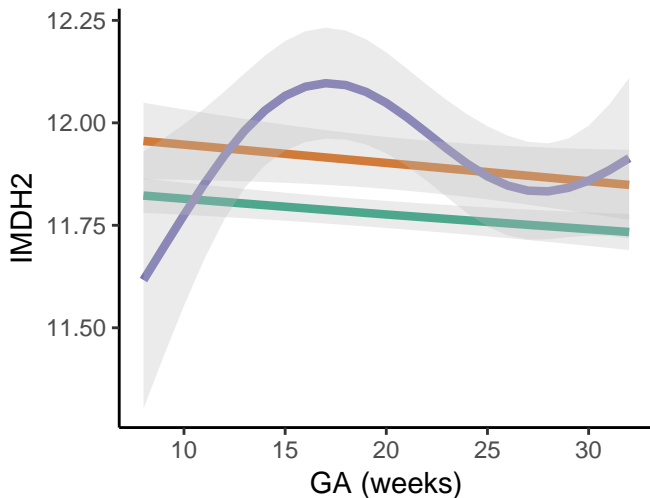

Group control PE

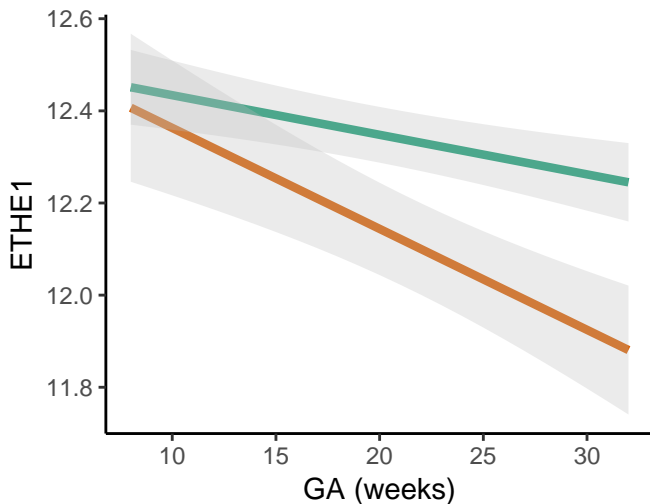

Group control mild PE severe PE

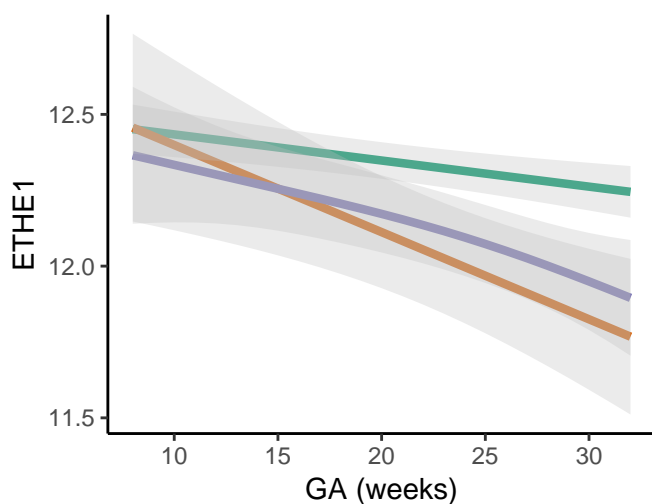

Group control MVM no MVM

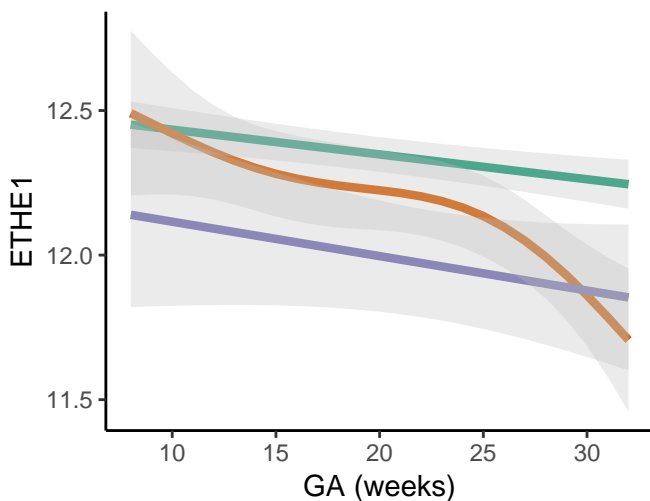

Group control PE

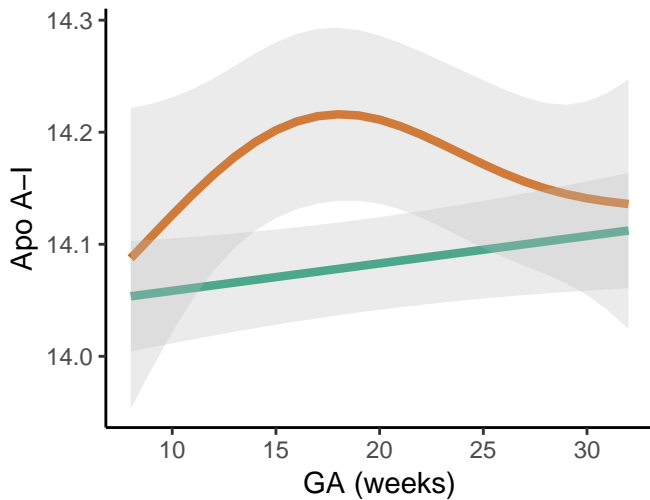

Group control mild PE severe PE

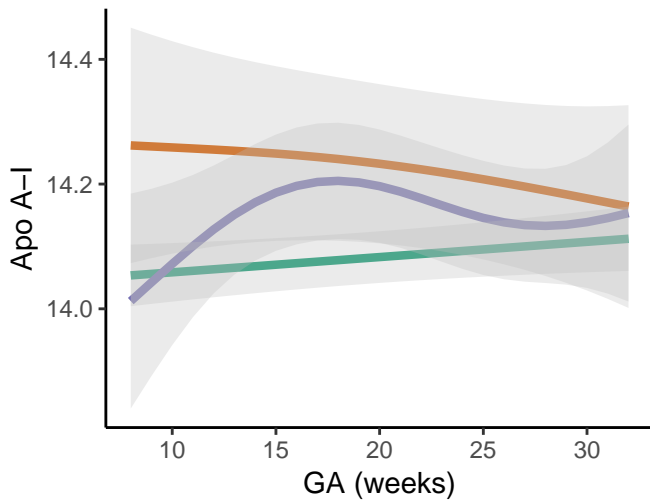

Group control MVM no MVM

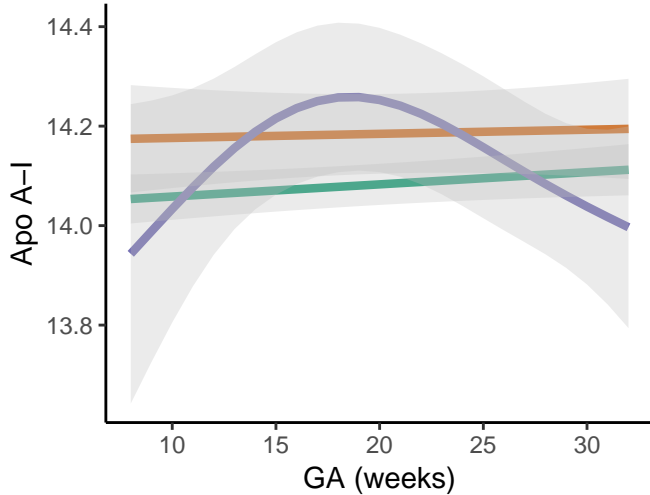

Group control PE

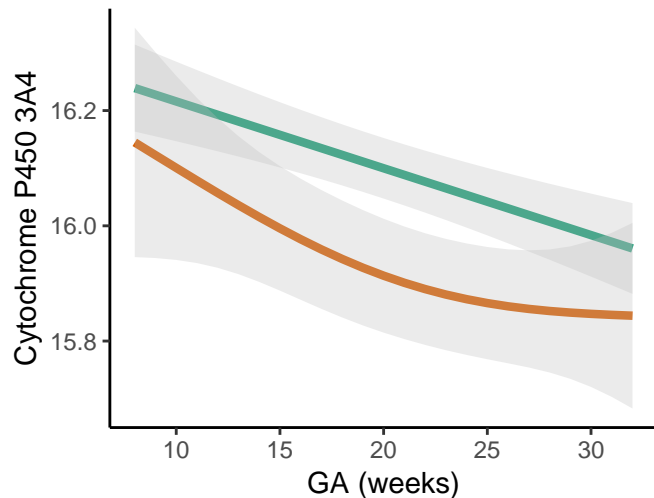

Group control mild PE severe PE

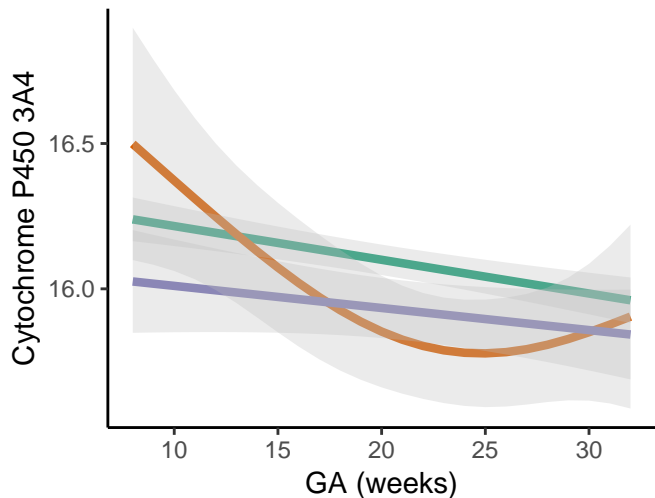

Group control MVM no MVM

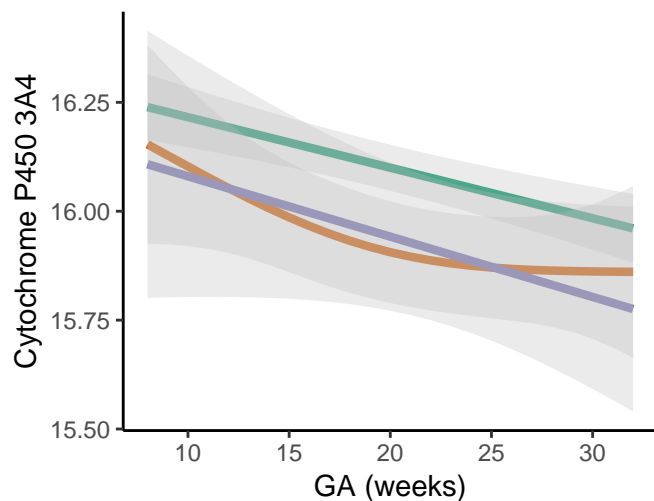

Group control PE

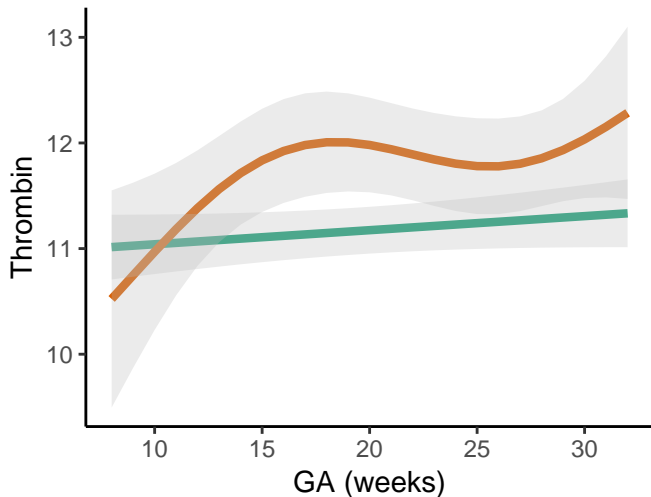

Group control mild PE severe PE

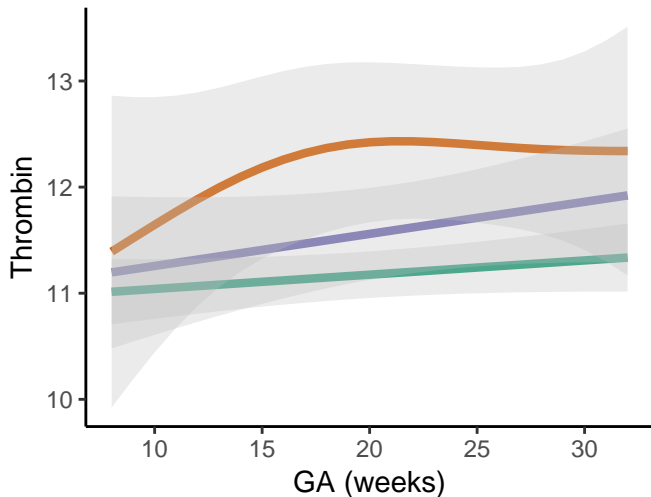

Group control MVM no MVM

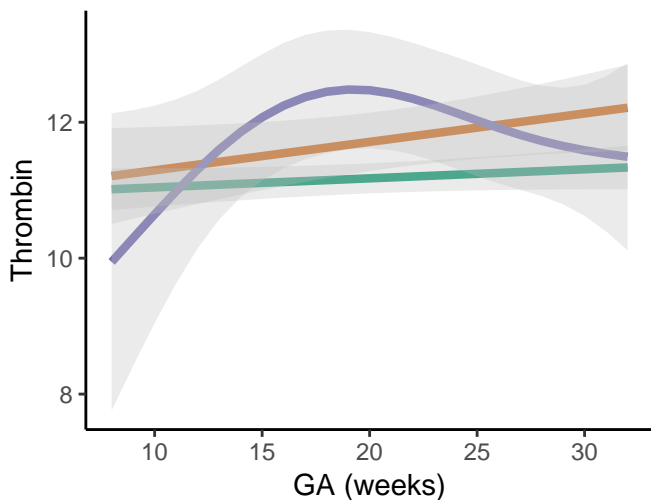



Group control PE

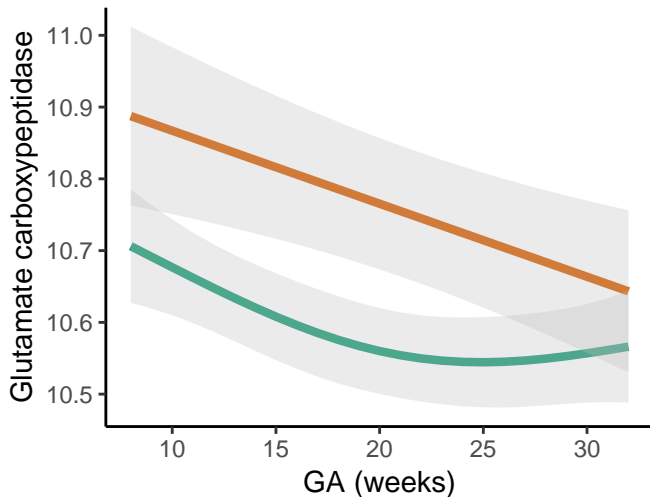

Group control mild PE severe PE

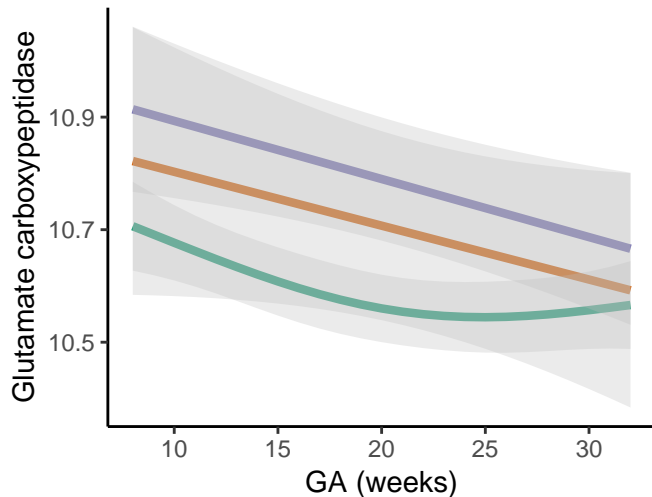

Group control MVM no MVM

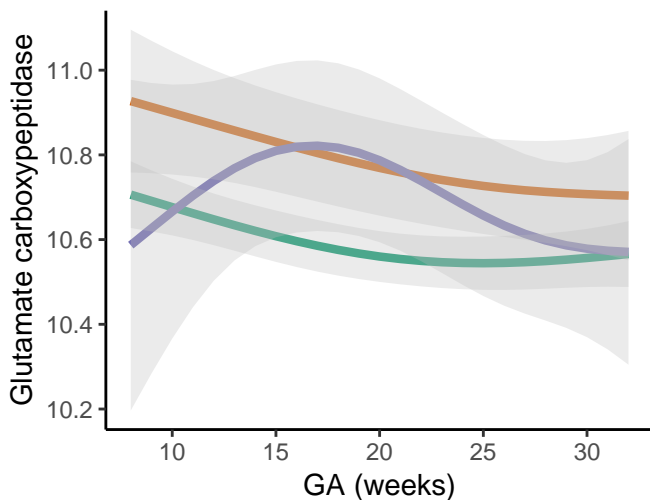

Group control PE

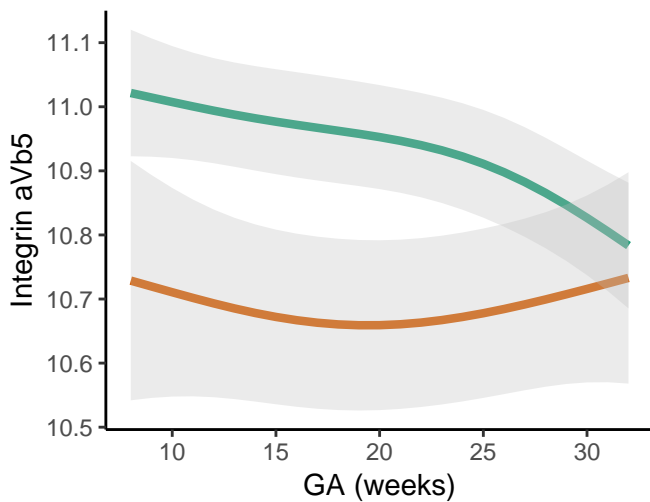

Group control mild PE severe PE

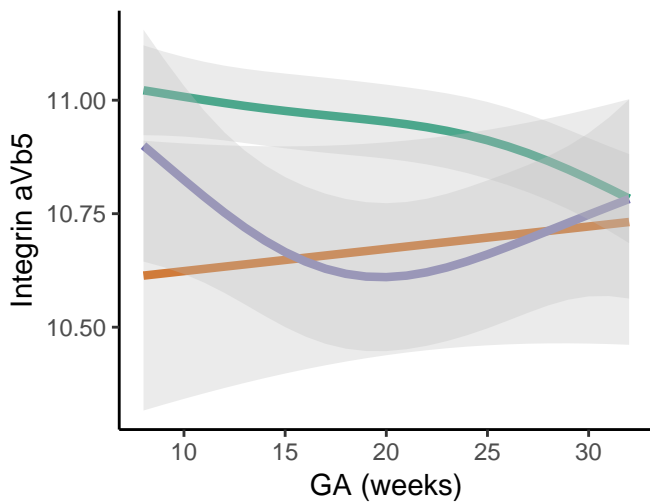

Group control MVM no MVM

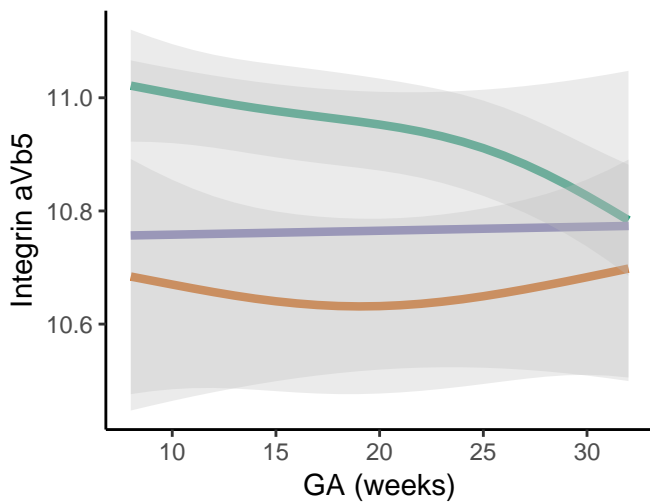

Group control PE

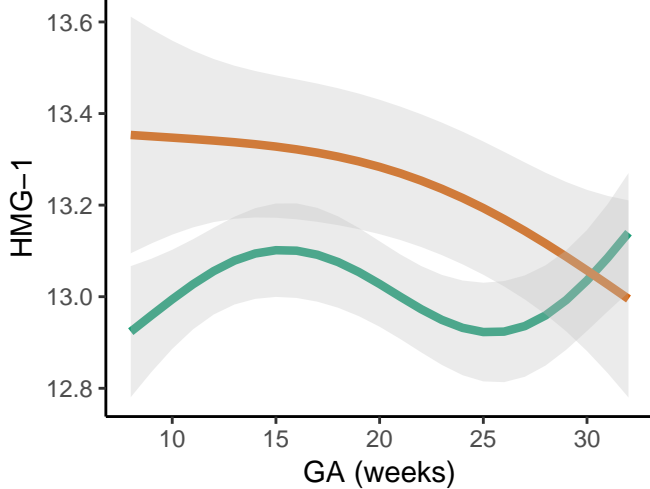

Group control mild PE severe PE

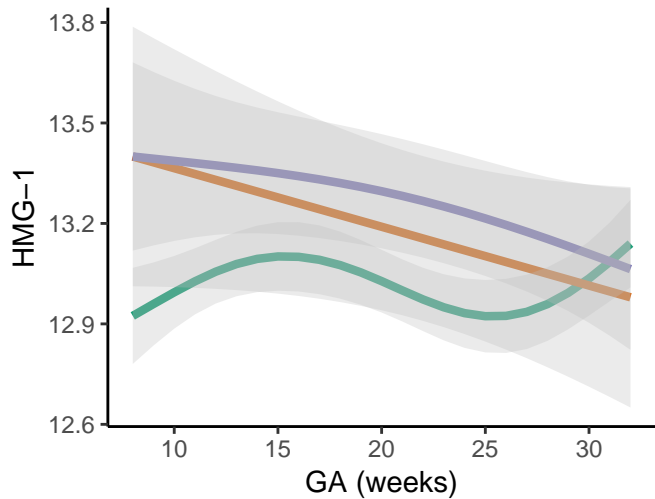

Group control MVM no MVM

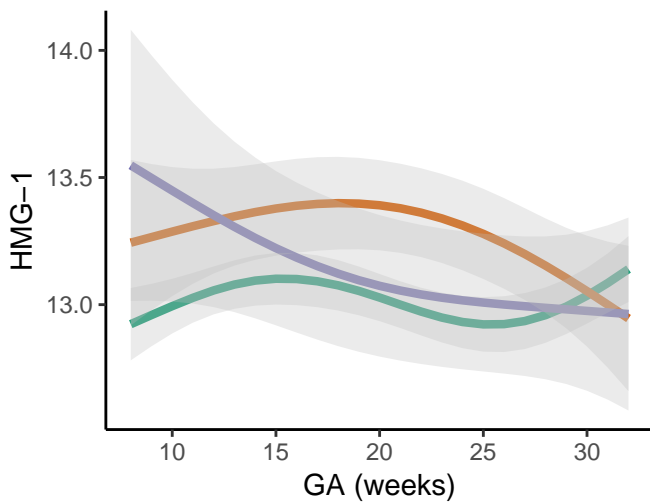

Group control PE

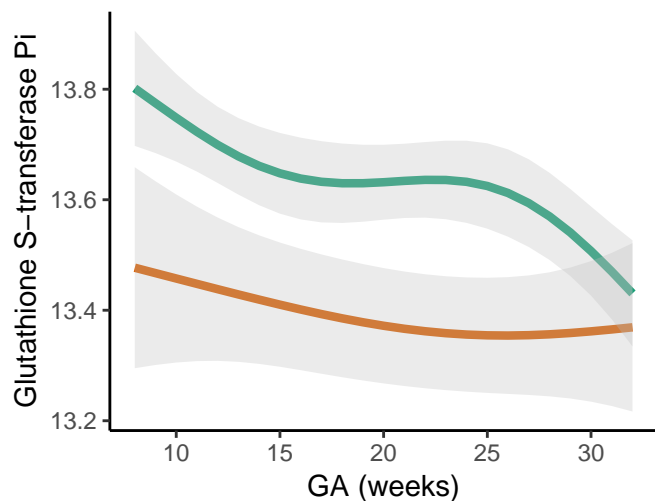

Group control mild PE severe PE

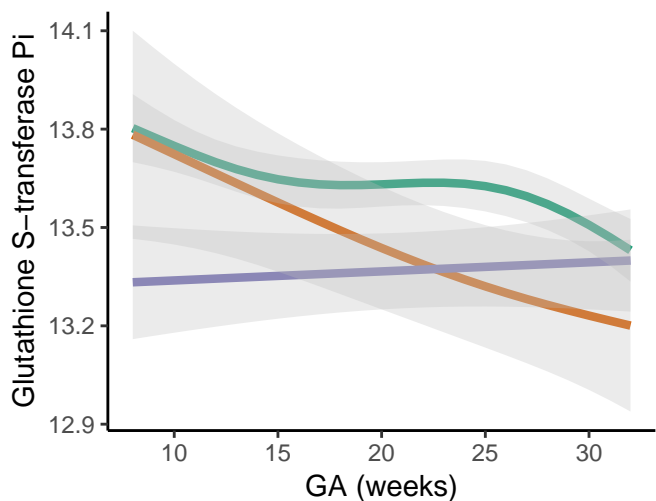

Group control MVM no MVM

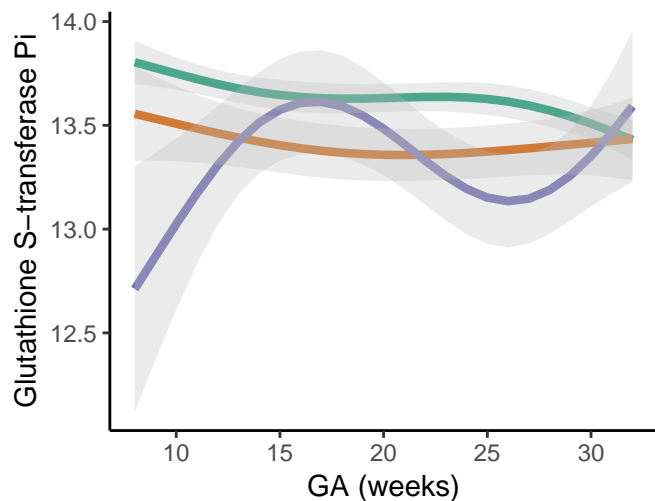

Group control PE

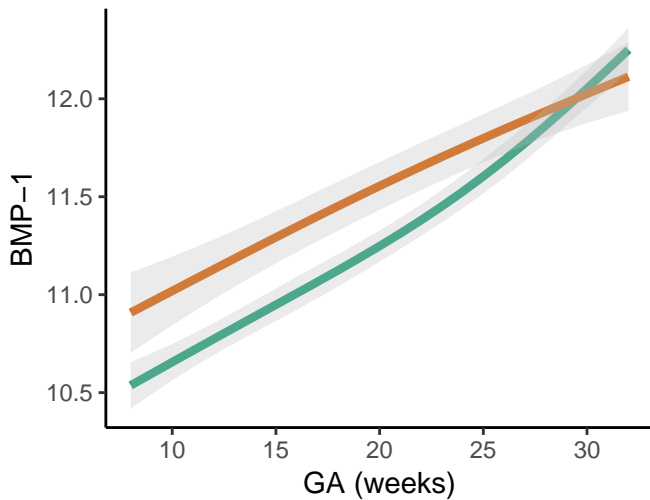

Group control mild PE severe PE

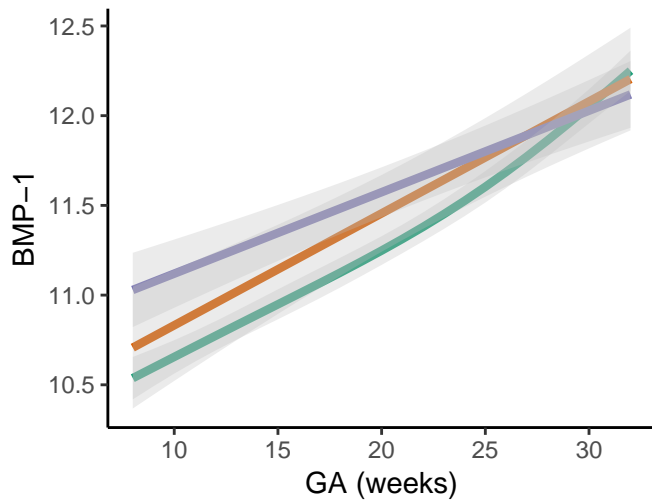

Group control MVM no MVM

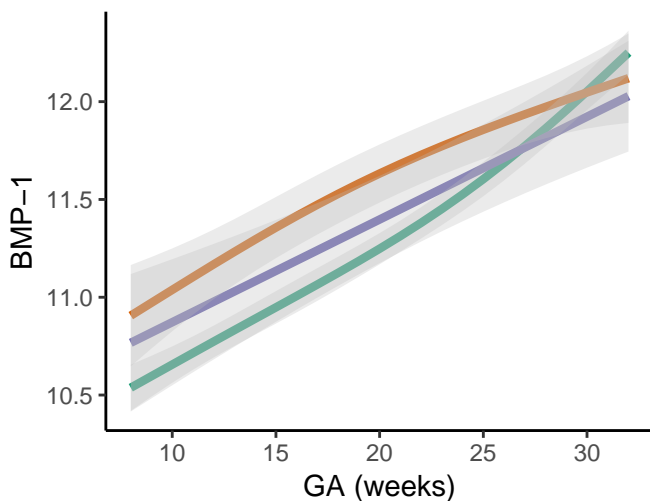

Group control PE

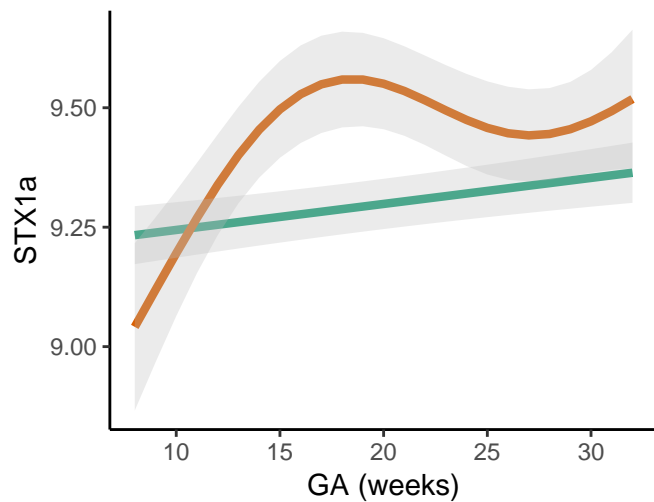

Group control mild PE severe PE

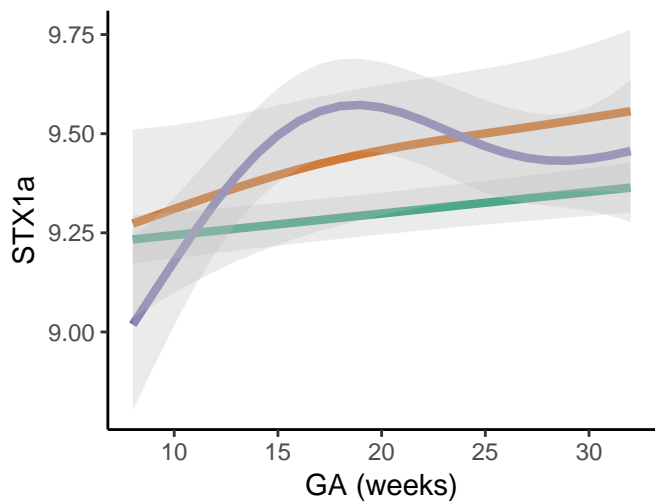

Group control MVM no MVM

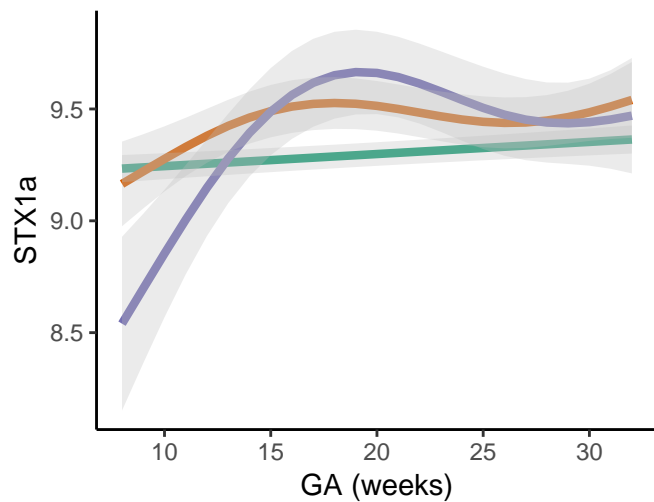

Group control PE

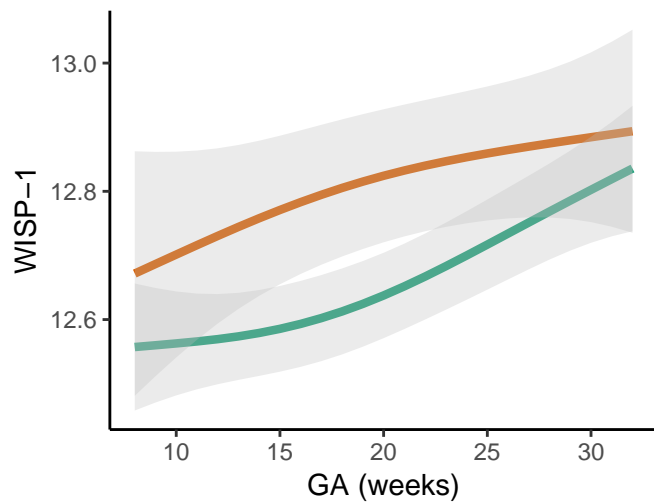

Group control mild PE severe PE

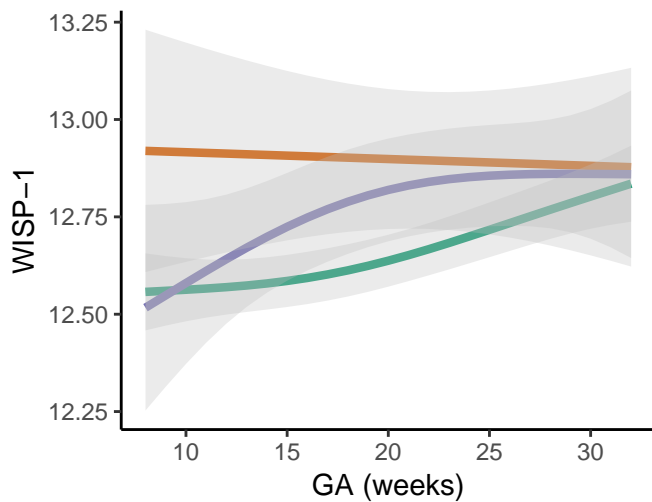

Group control MVM no MVM

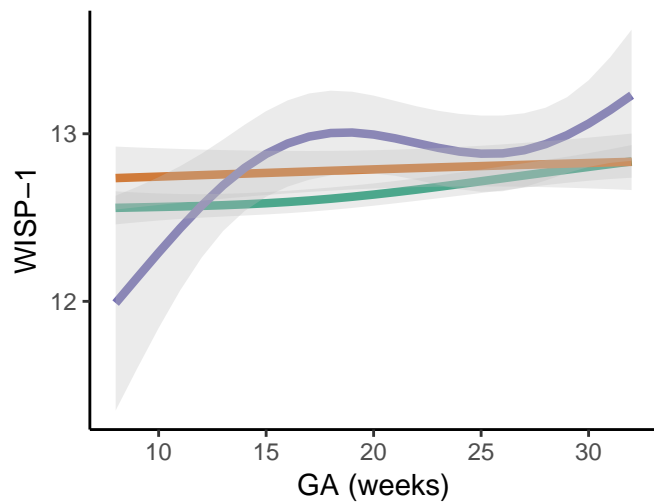

Group control PE

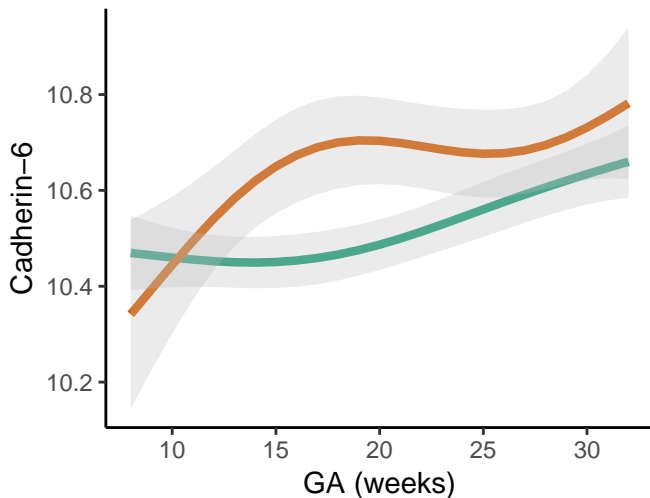

Group control mild PE severe PE

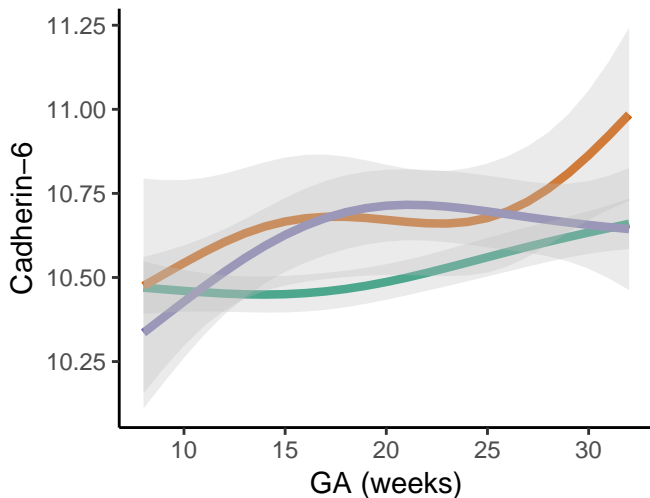

Group control MVM no MVM

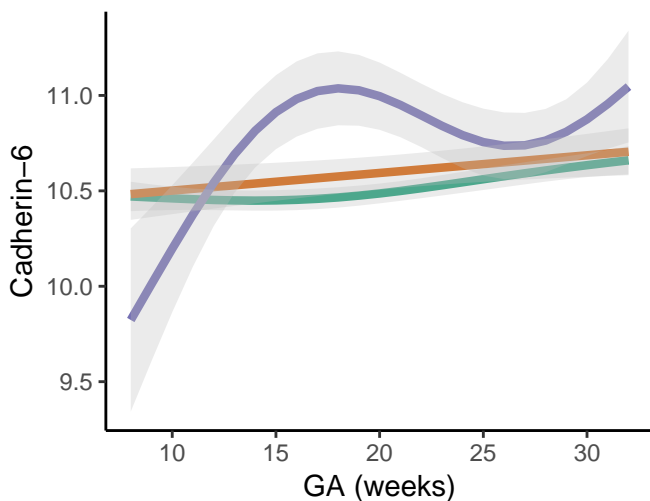



Group control PE

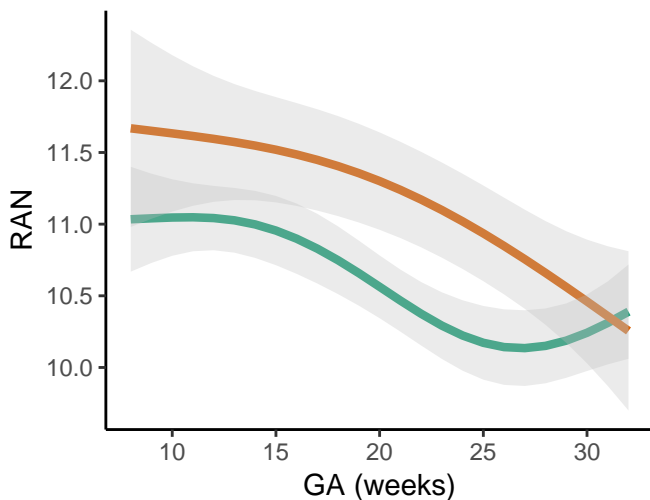

Group control mild PE severe PE

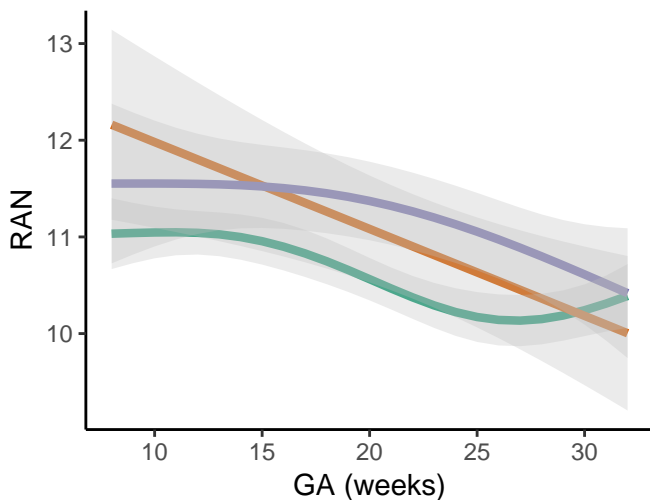

Group control MVM no MVM

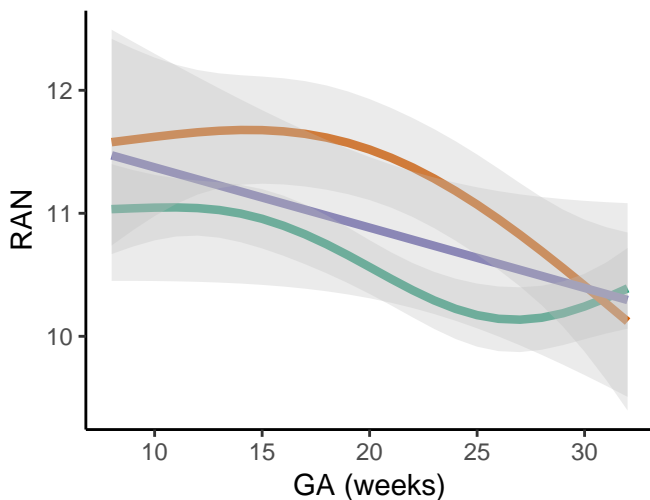

Group control PE

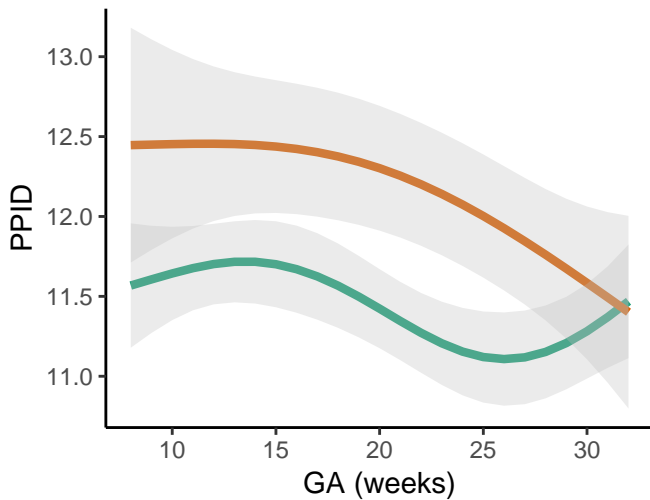

Group control mild PE severe PE

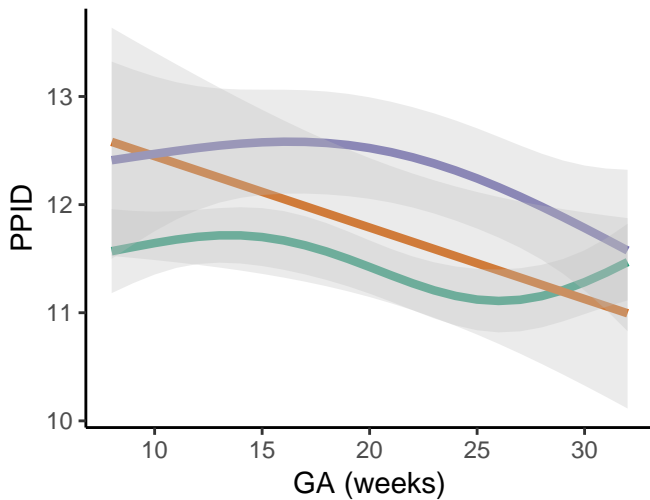

Group control MVM no MVM

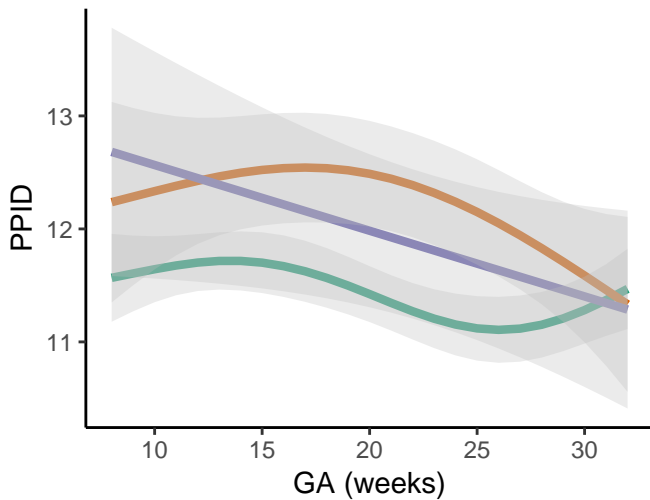

Group control PE

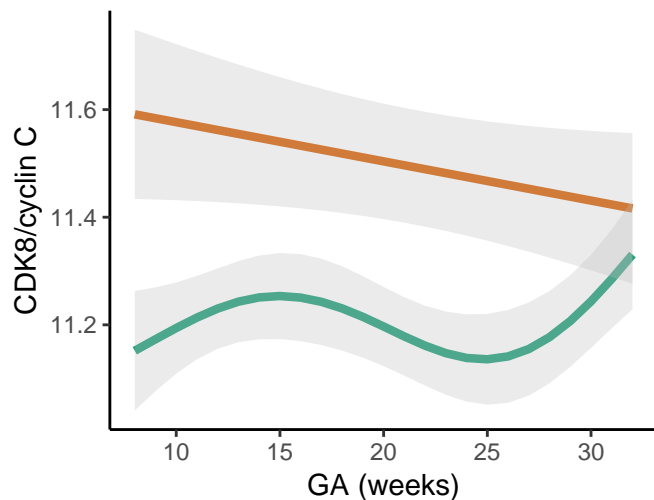

Group control mild PE severe PE

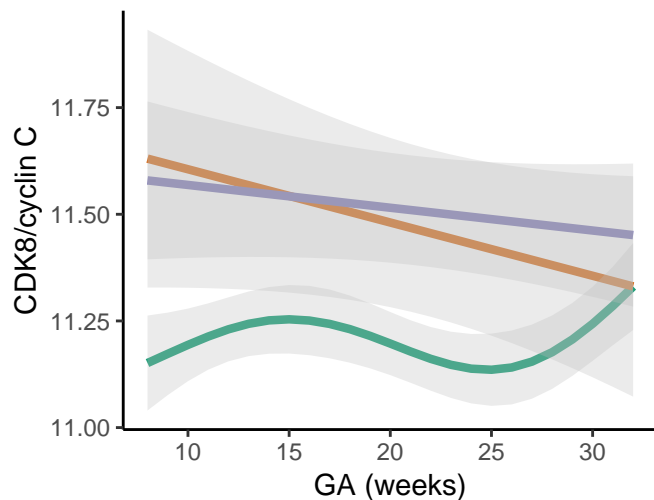

Group control MVM no MVM

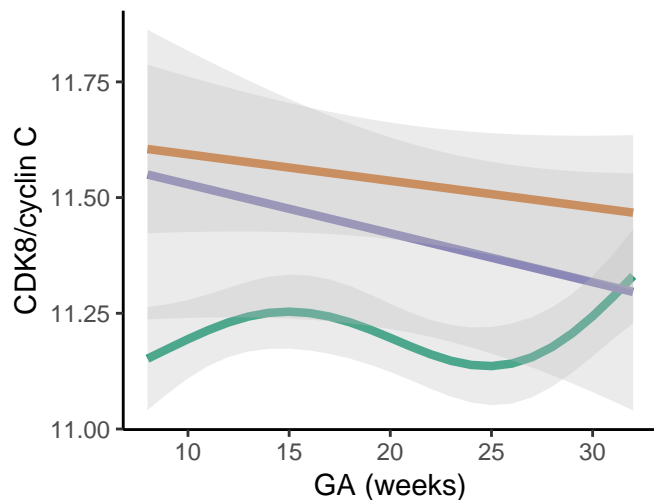

Group control PE

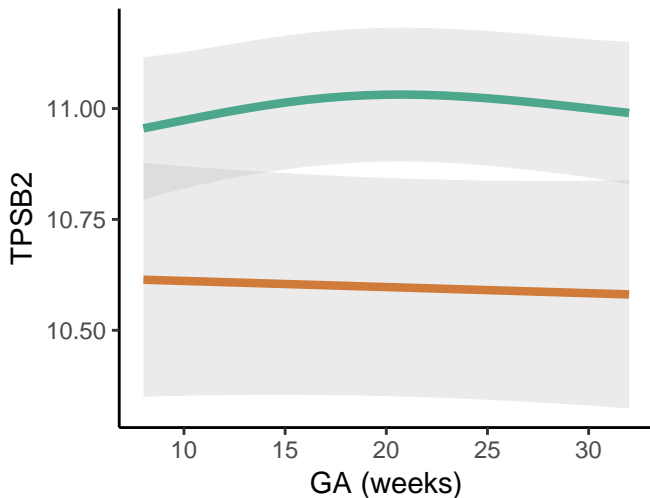

Group control mild PE severe PE

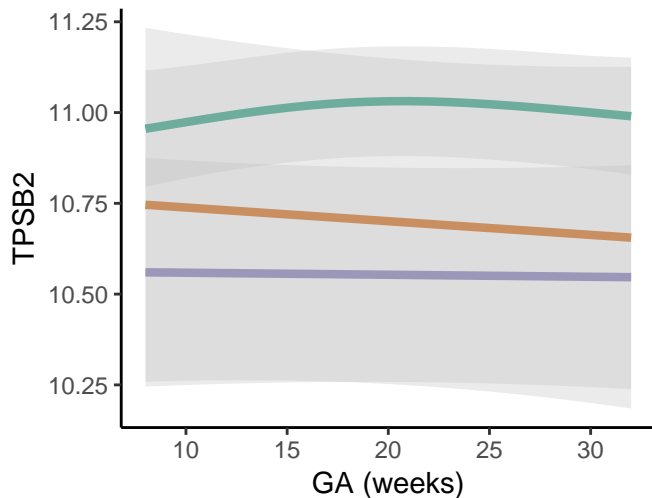

Group control MVM no MVM

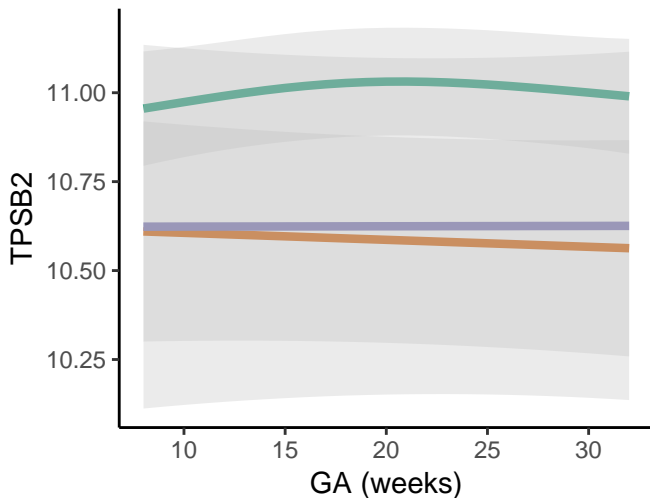

Group control PE

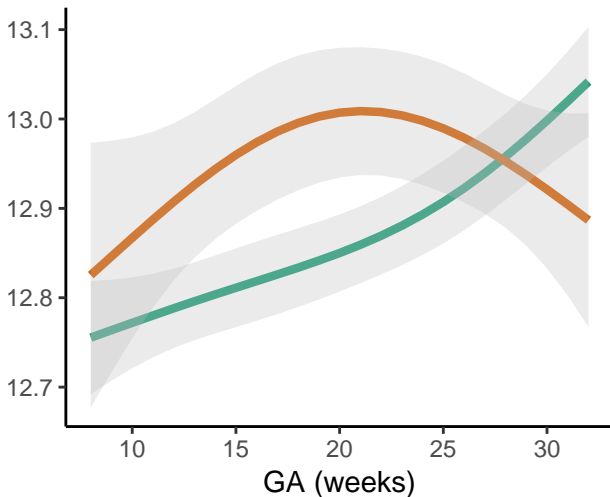

Group control mild PE severe PE

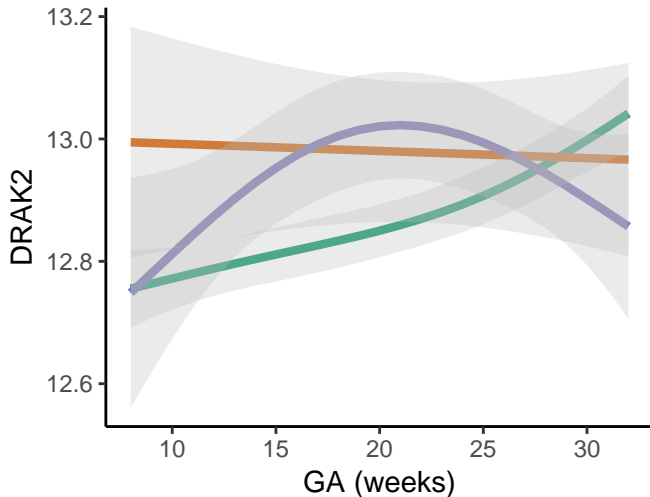

Group control MVM no MVM

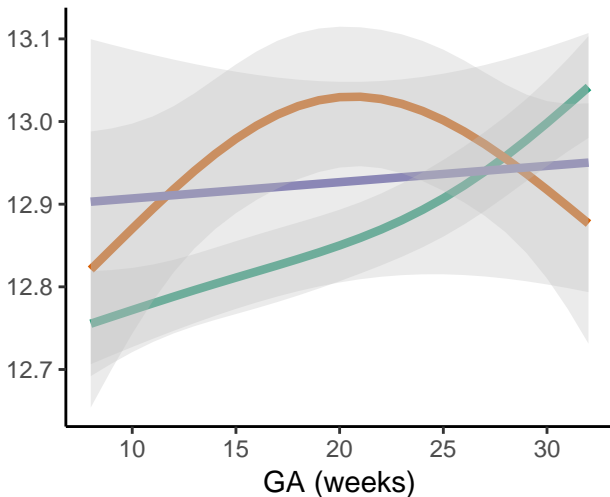

Group control PE

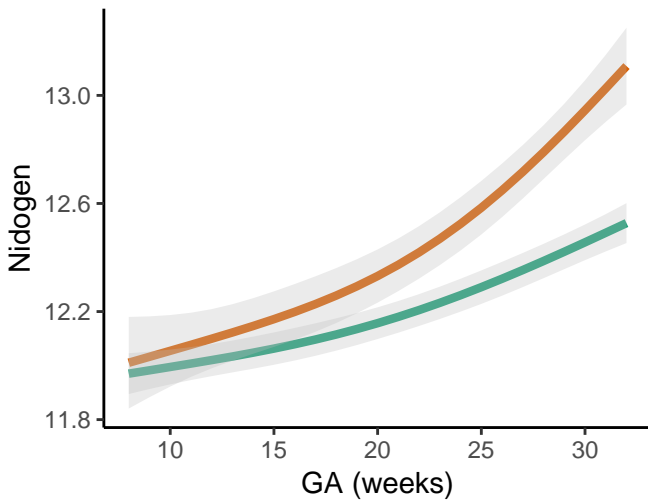

Group control mild PE severe PE

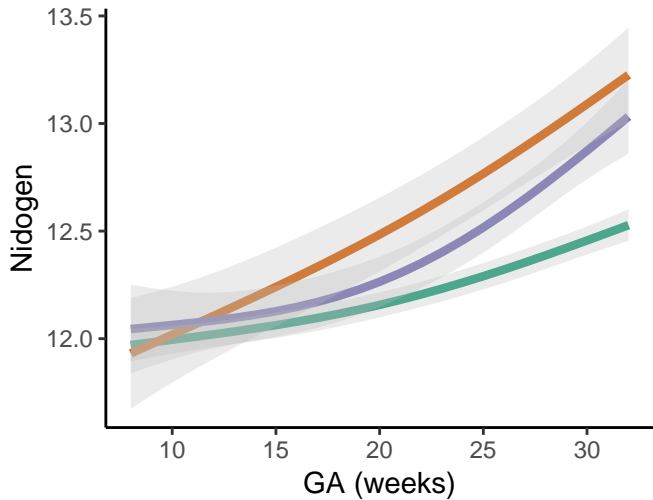

Group control MVM no MVM

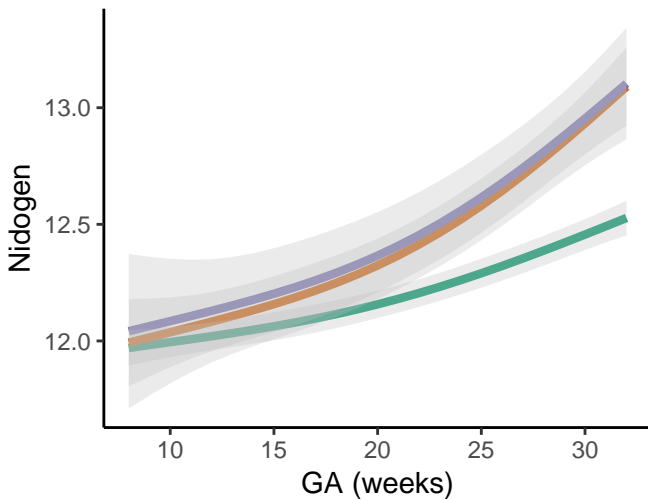

Group control PE

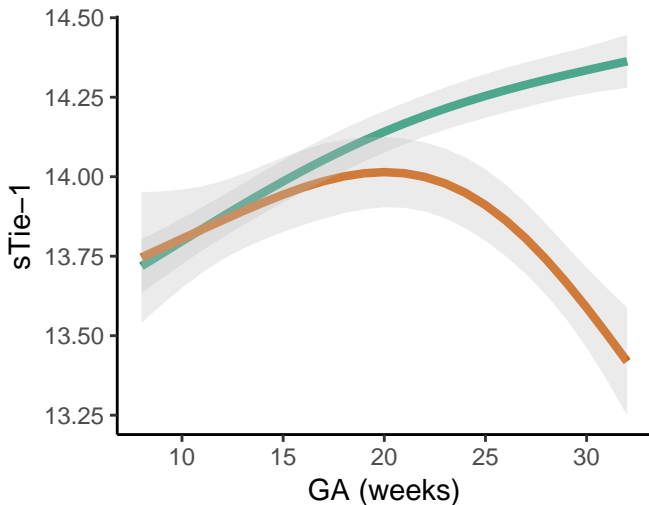

Group control mild PE severe PE

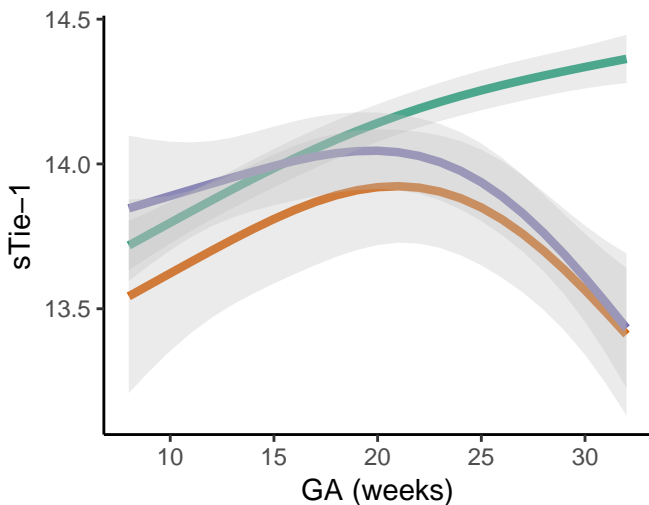

Group control MVM no MVM

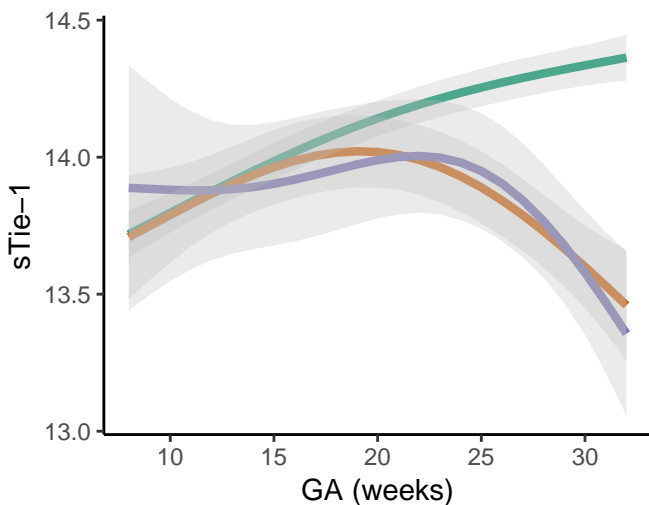

Group control PE

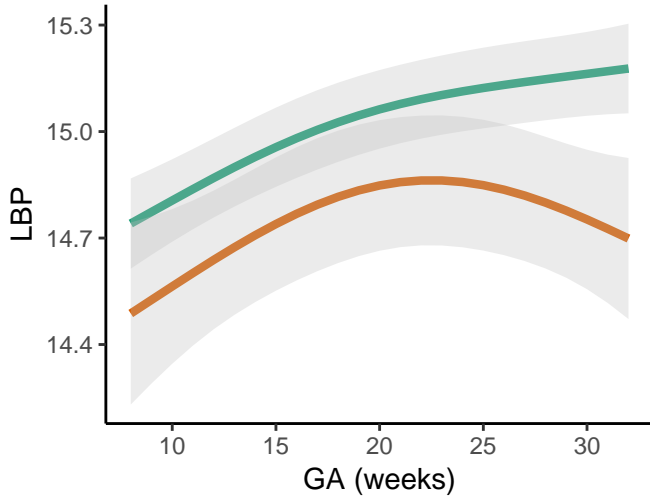

Group control mild PE severe PE

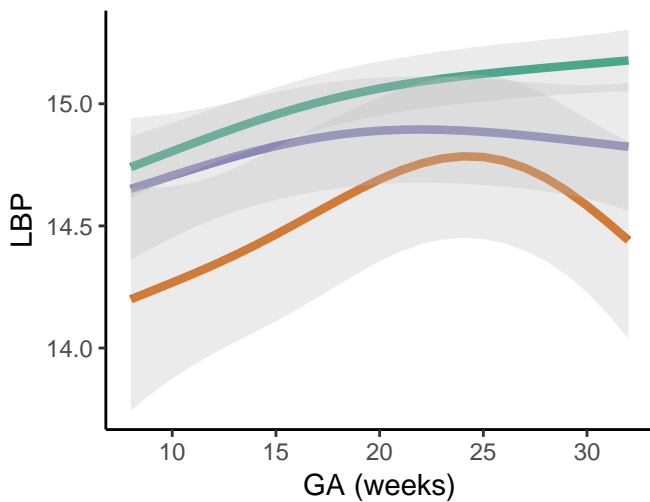

Group control MVM no MVM

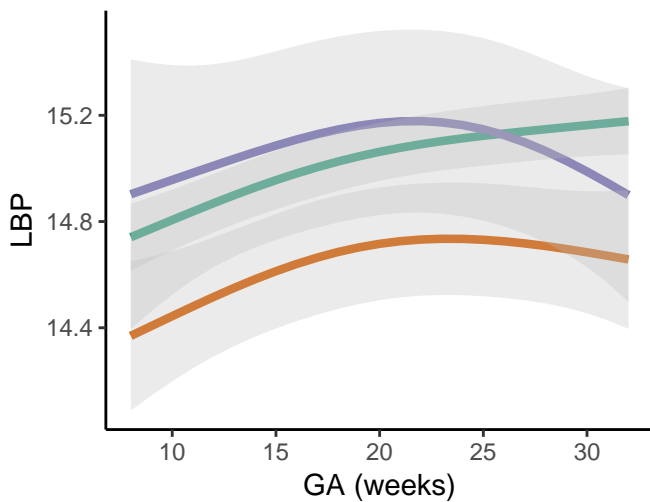



Group control PE

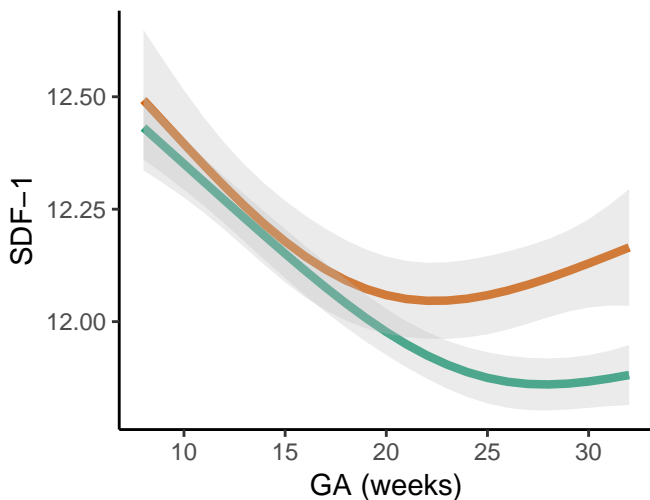

Group control mild PE severe PE

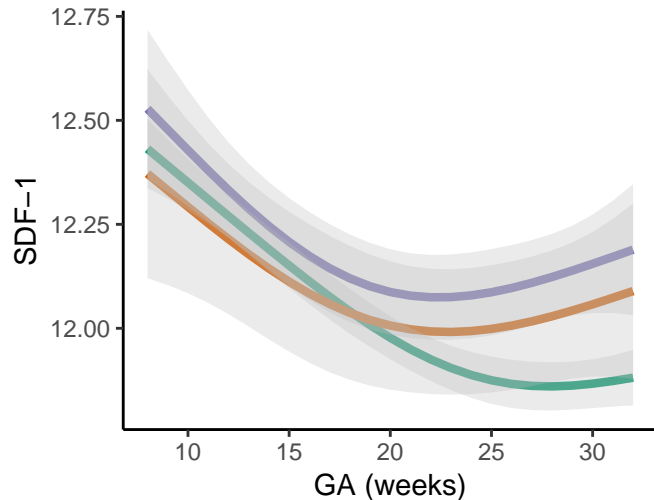

Group control MVM no MVM

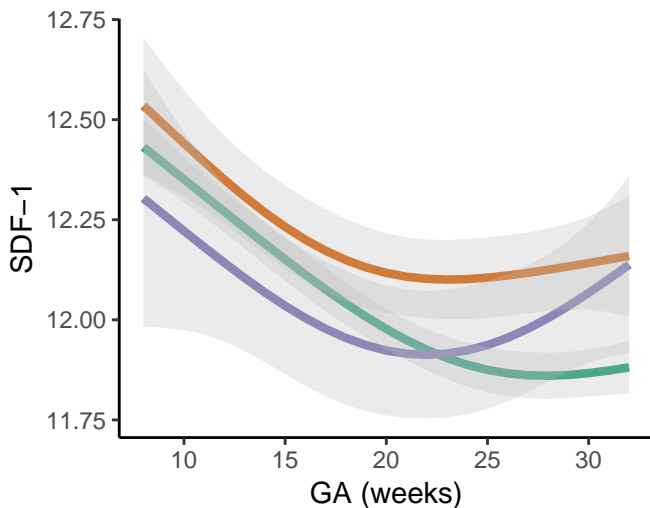

Group control PE

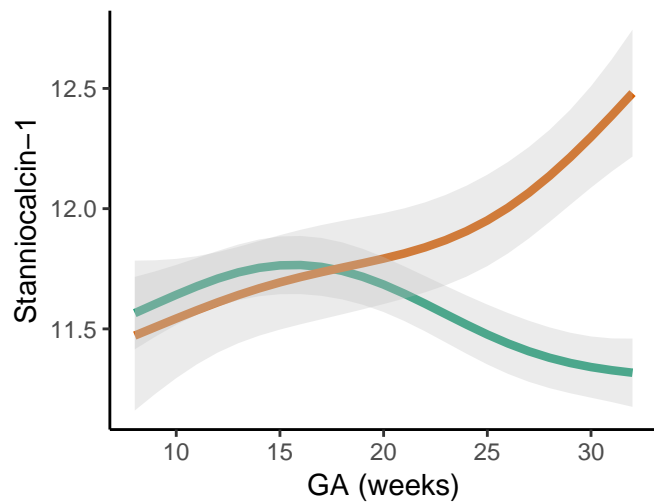

Group control mild PE severe PE

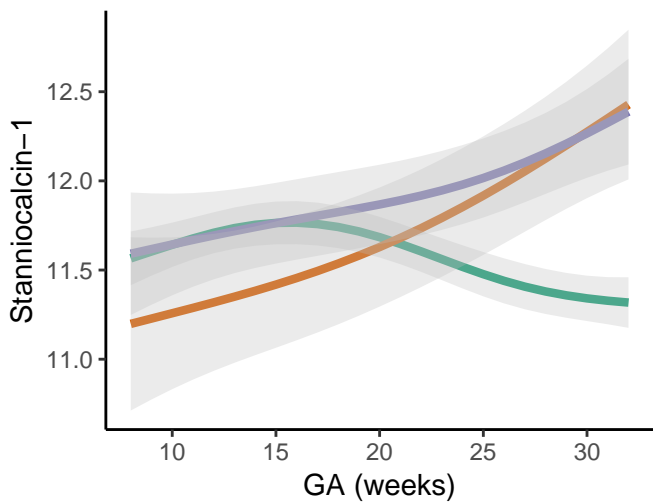

Group control MVM no MVM

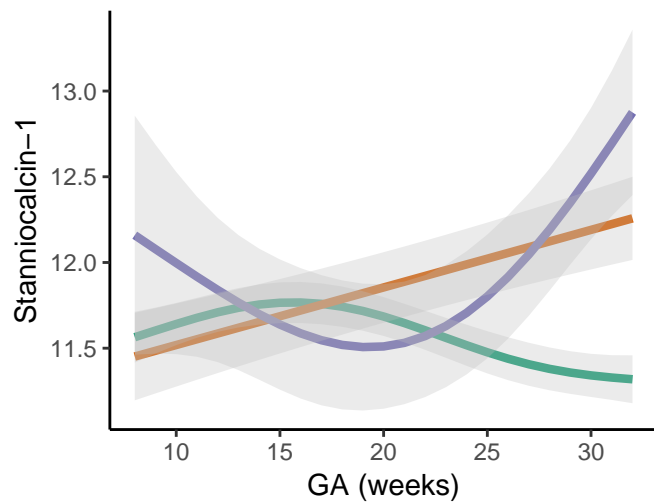

Group control PE

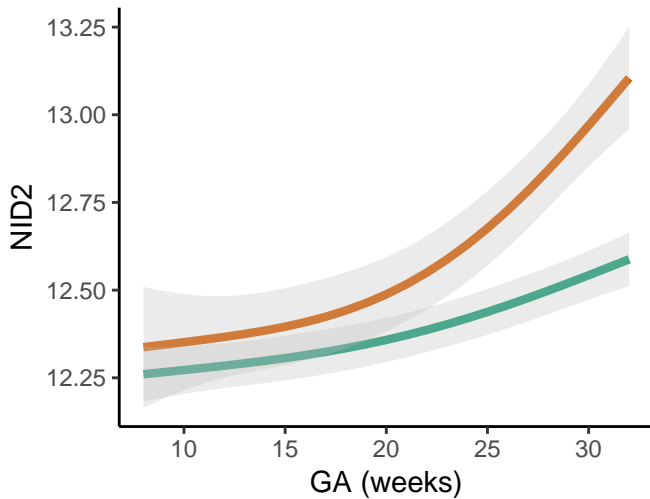

Group control mild PE severe PE

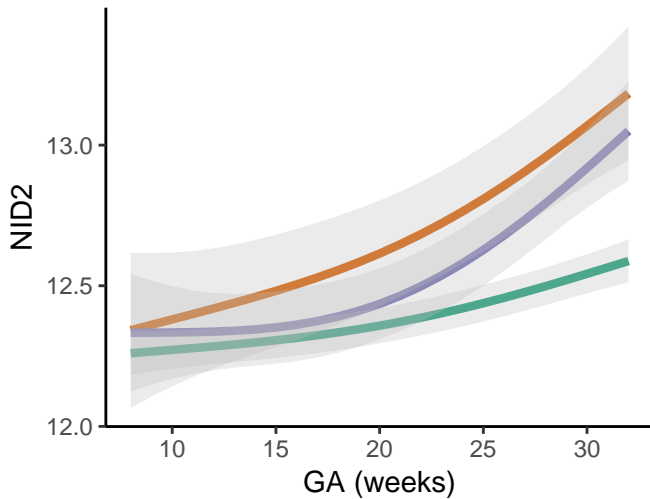

Group control MVM no MVM

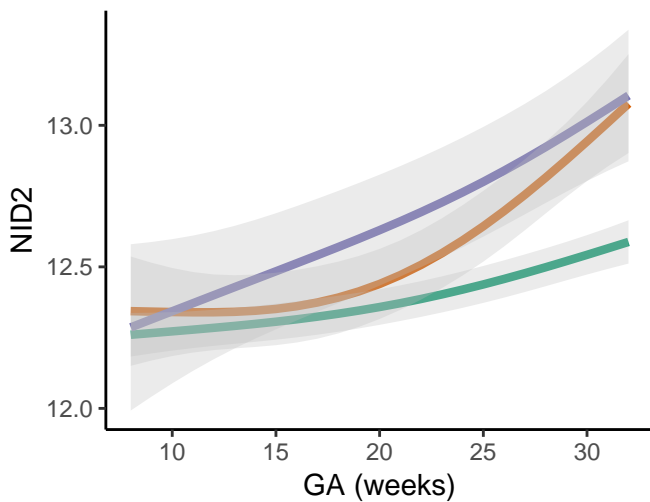

Group control PE

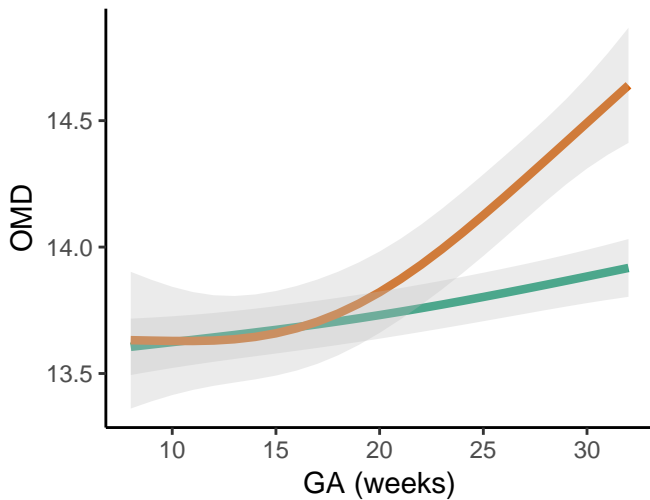

Group control mild PE severe PE

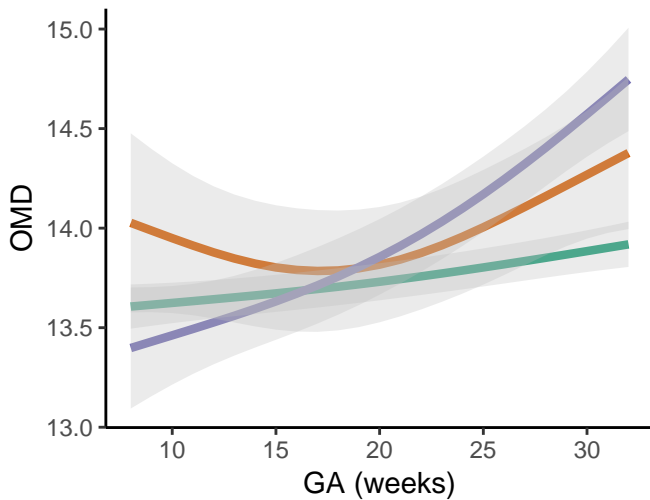

Group control MVM no MVM

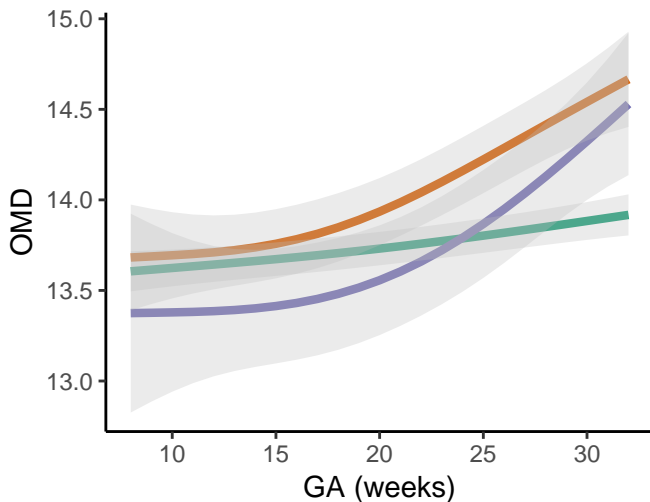

Group control PE

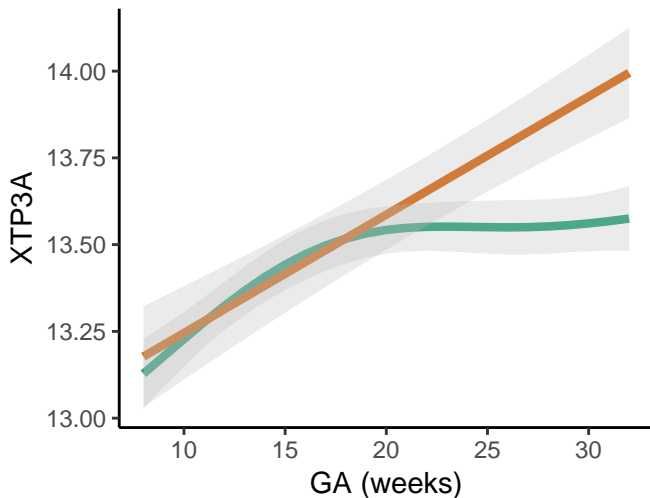

Group control mild PE severe PE

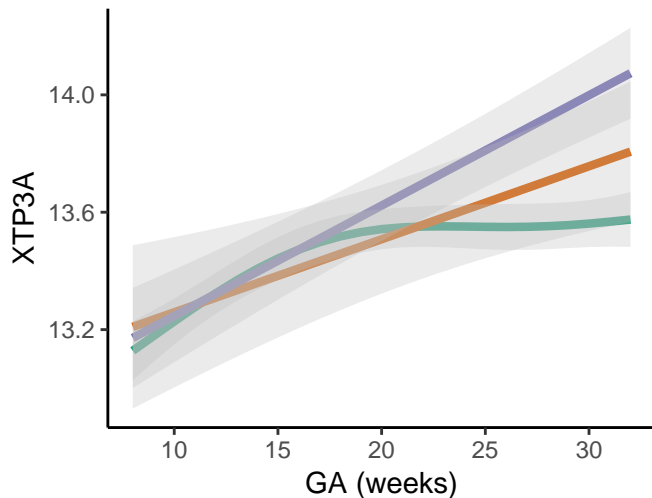

Group control MVM no MVM

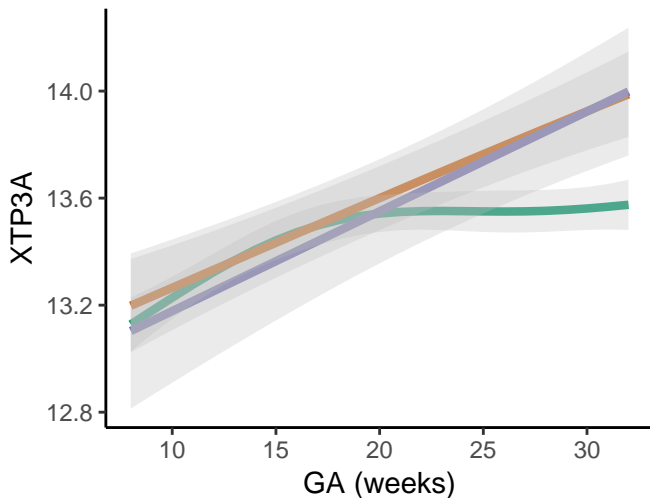

Group control PE

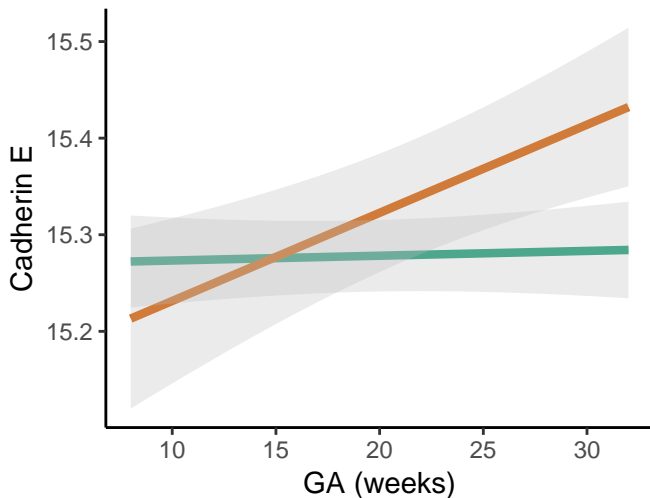

Group control mild PE severe PE

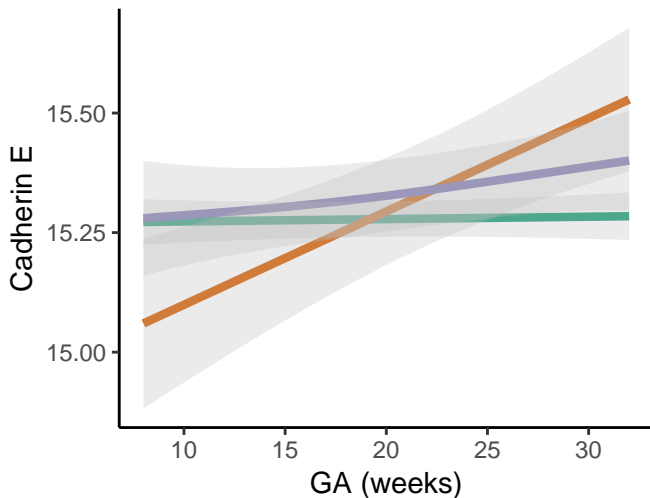

Group control MVM no MVM

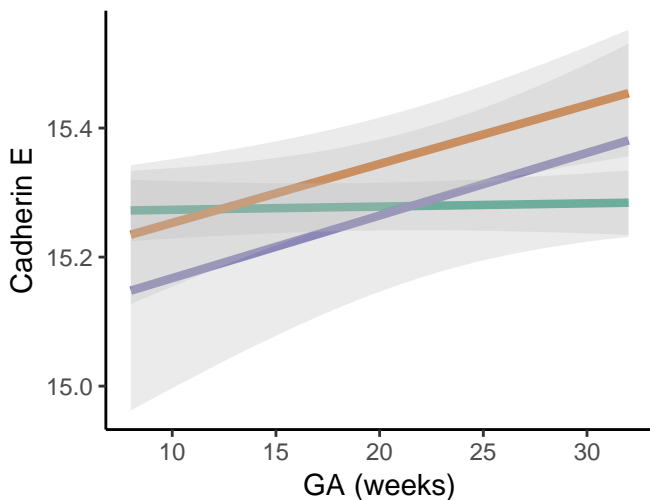

Group control PE

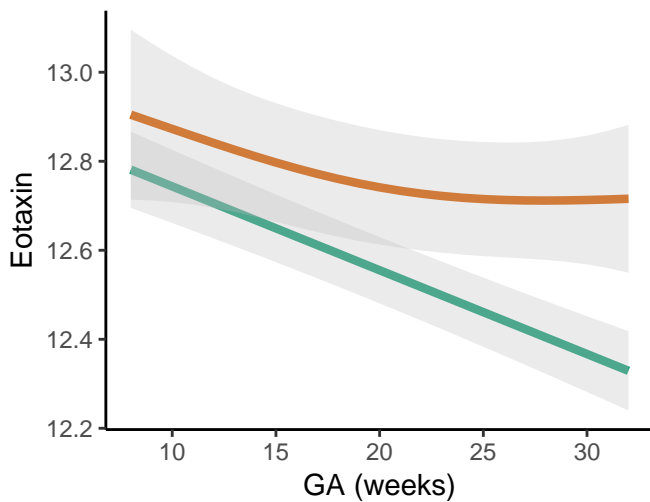

Group control mild PE severe PE

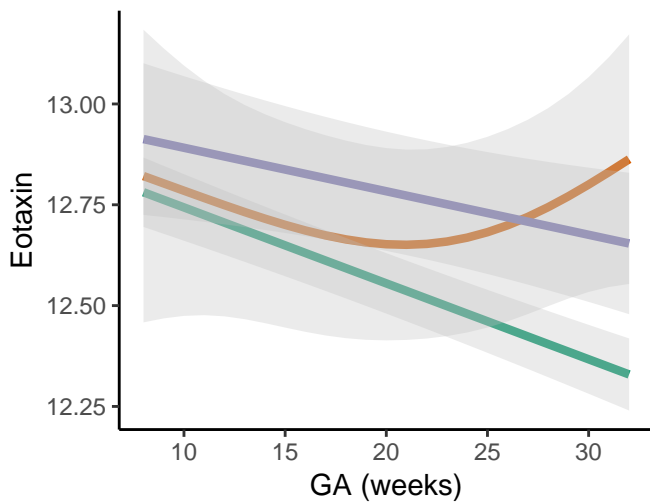

Group control MVM no MVM

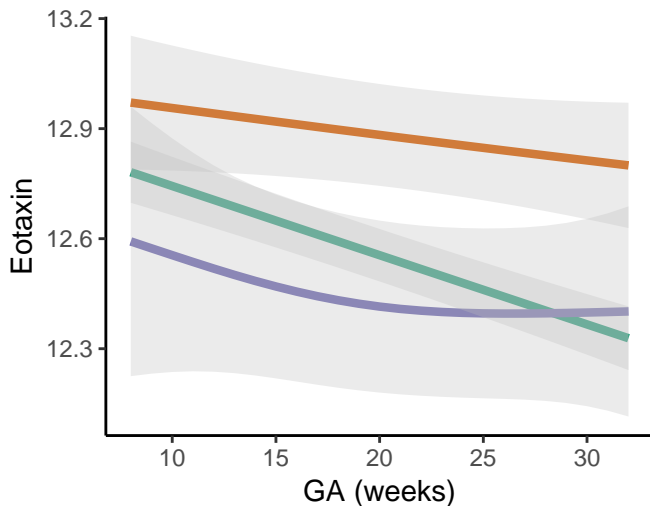

Group control PE

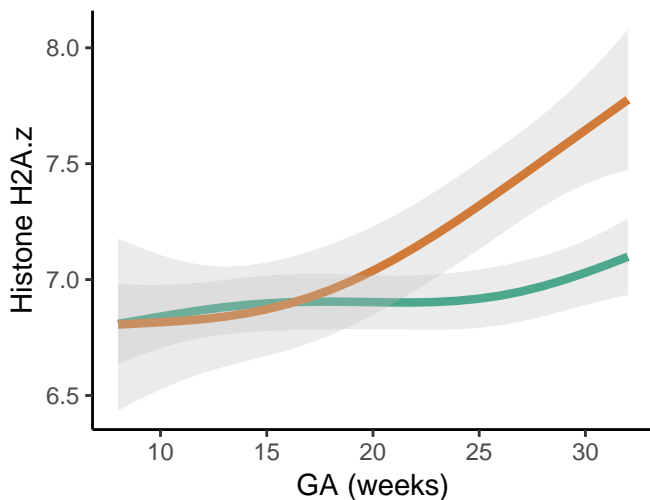

Group control mild PE severe PE

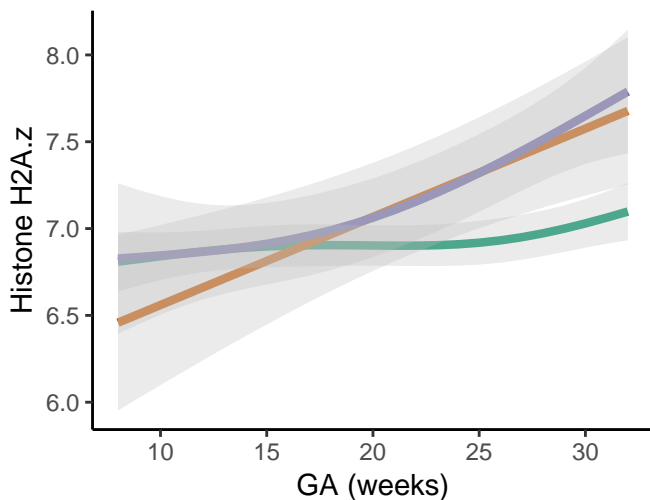

Group control MVM no MVM

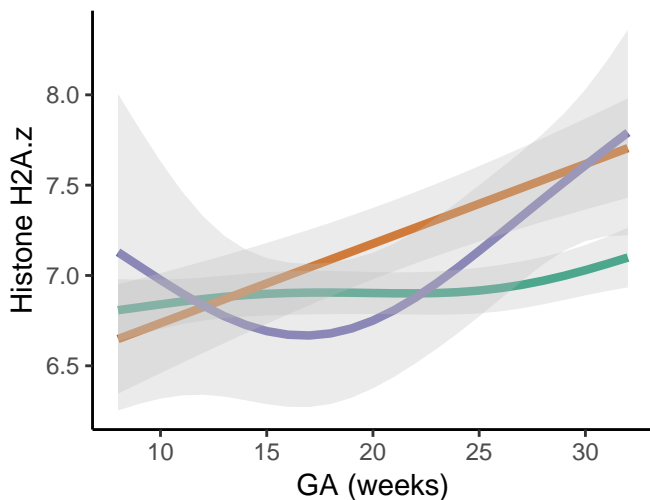



Group control PE

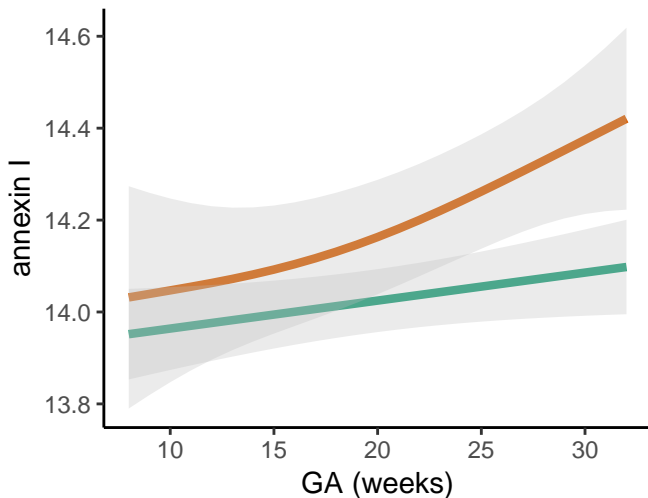

Group control mild PE severe PE

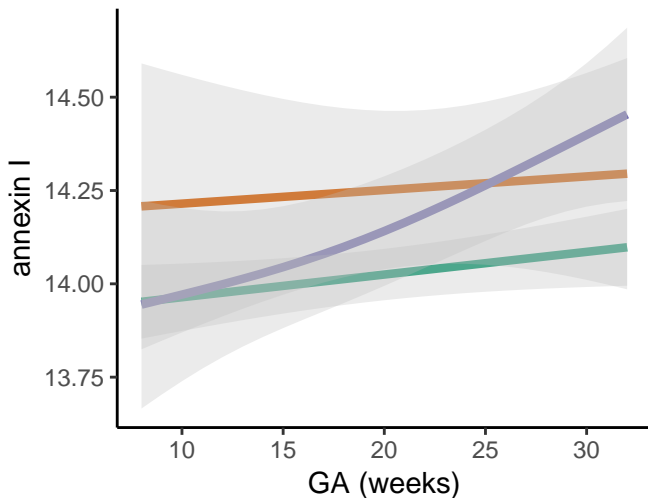

Group control MVM no MVM

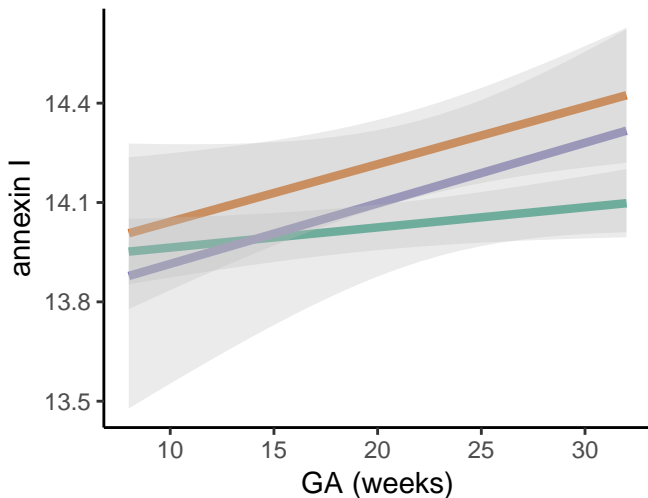

Group control PE

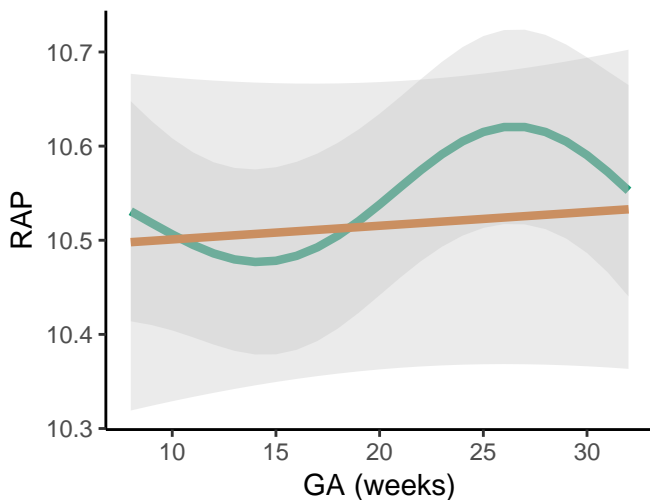

Group control mild PE severe PE

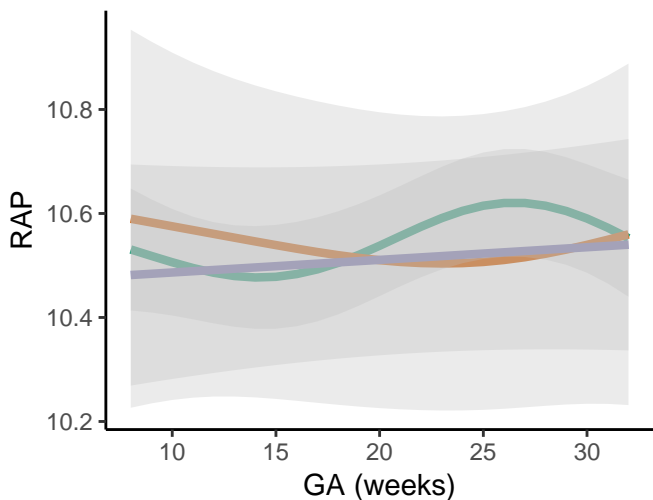

Group control MVM no MVM

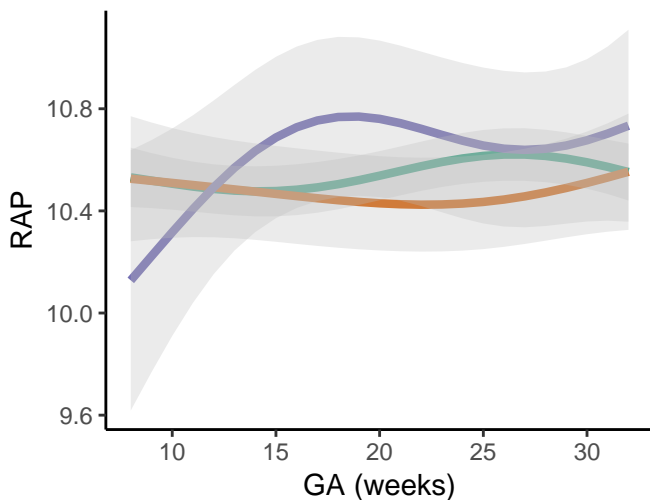

Group control PE

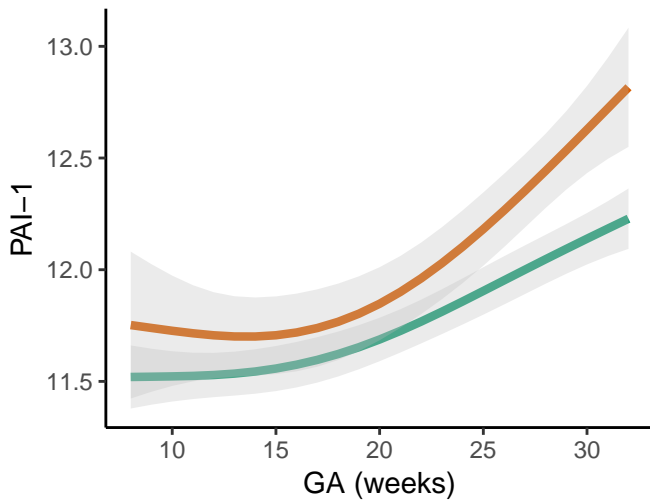

Group control mild PE severe PE

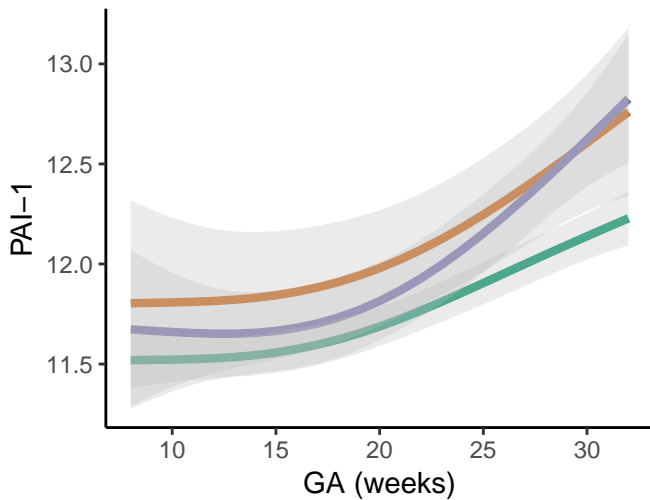

Group control MVM no MVM

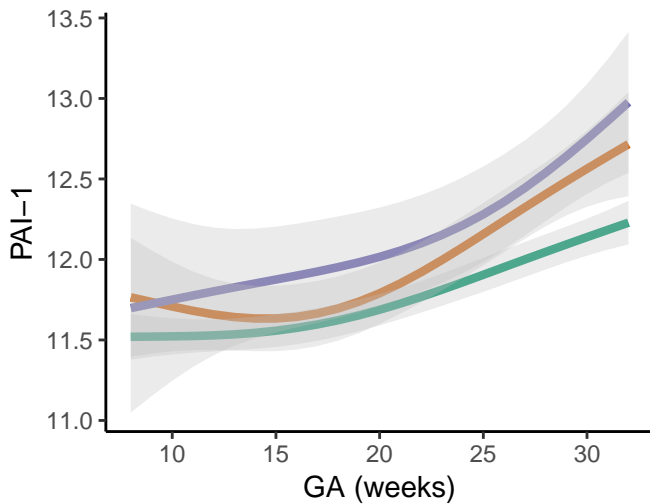

Group control PE

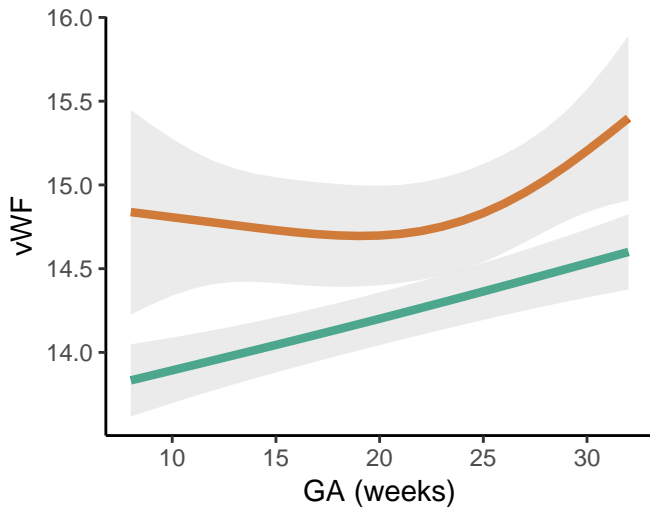

Group control mild PE severe PE

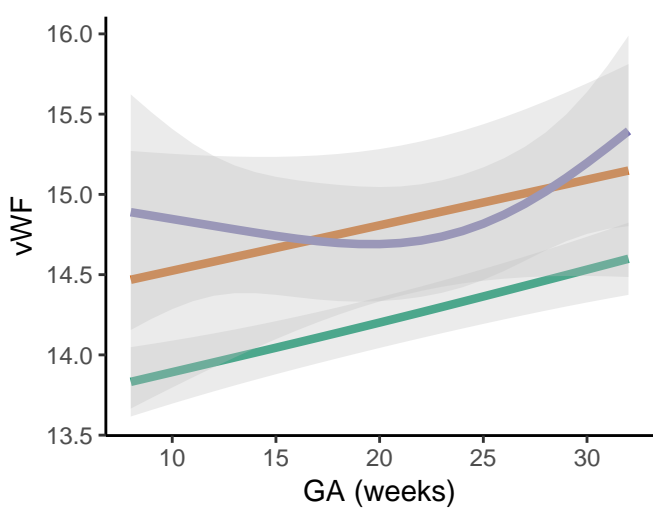

Group control MVM no MVM

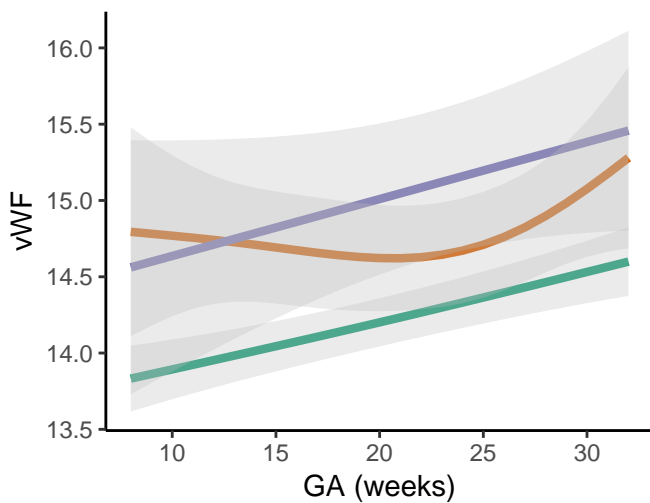

Group control PE

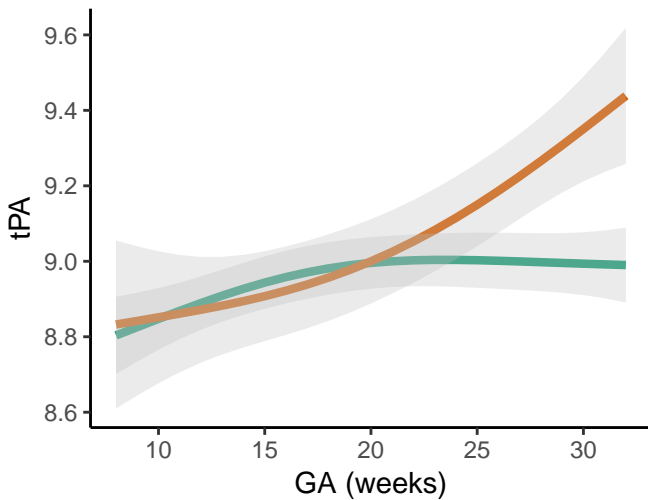

Group control mild PE severe PE

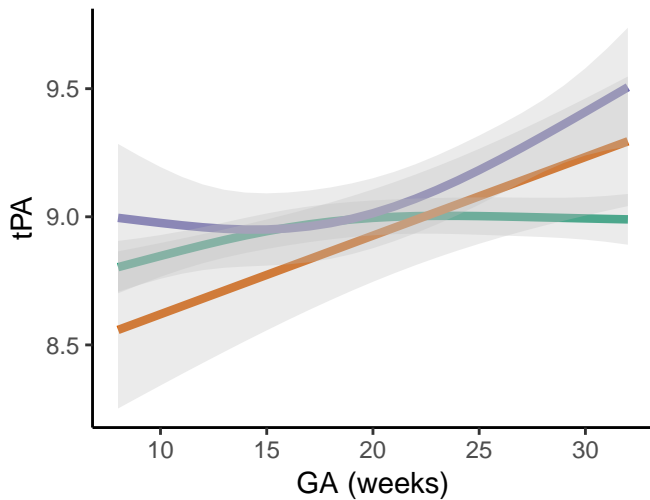

Group control MVM no MVM

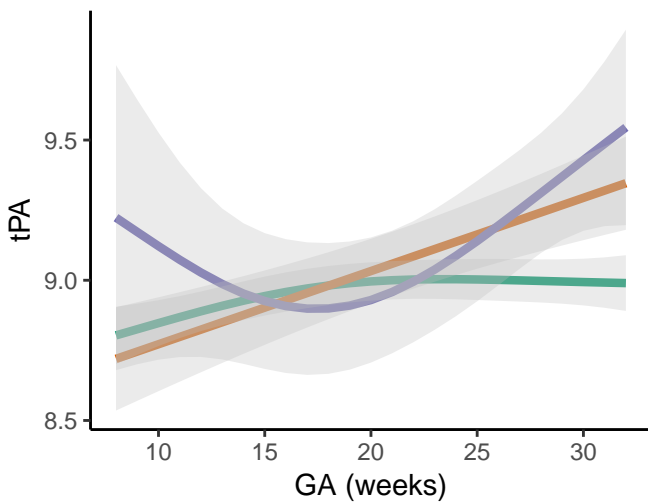

Group control PE

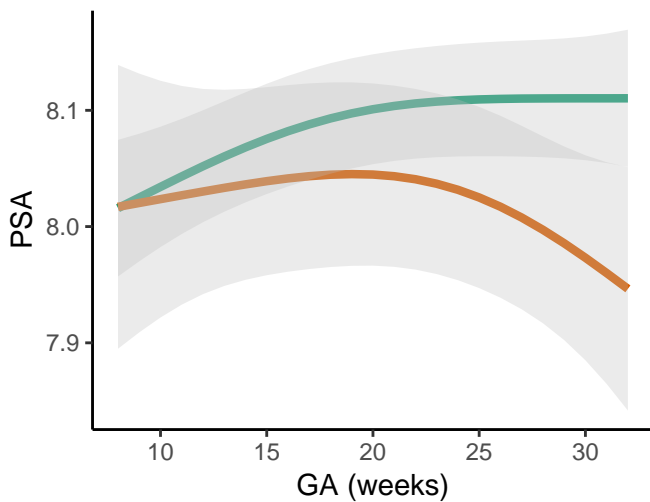

Group control mild PE severe PE

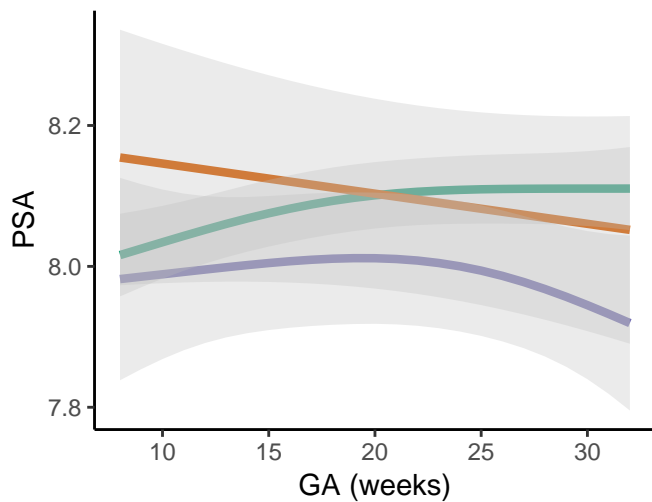

Group control MVM no MVM

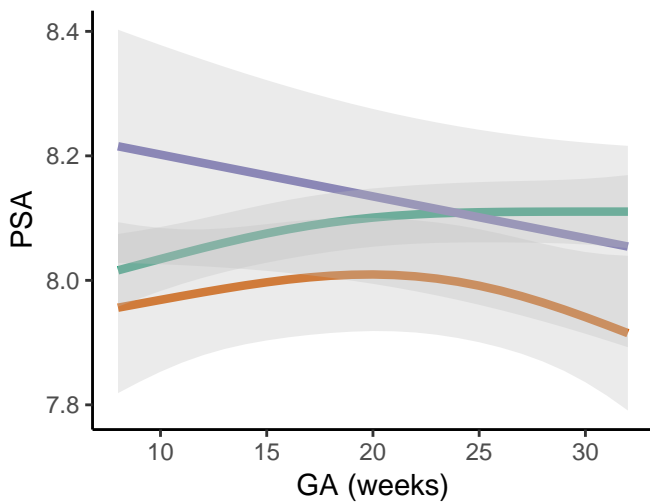

Group control PE

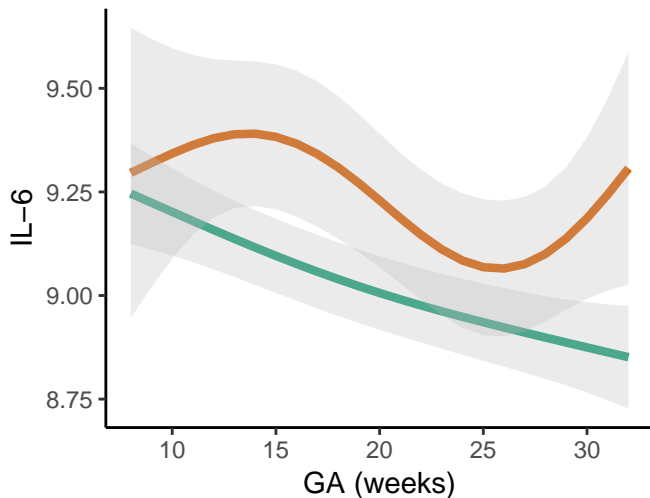

Group control mild PE severe PE

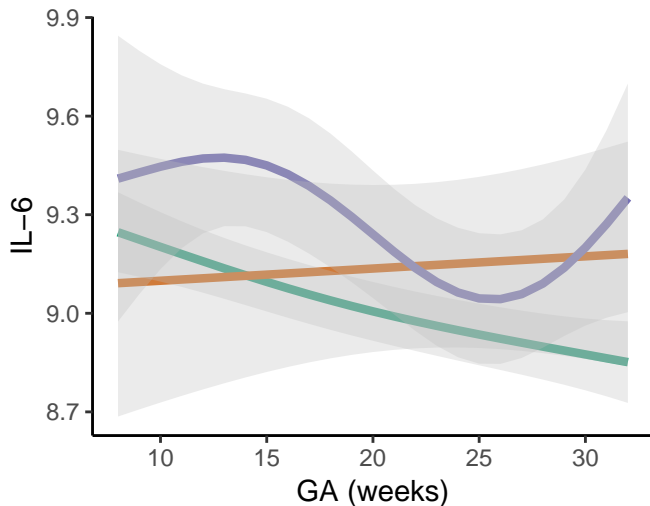

Group control MVM no MVM

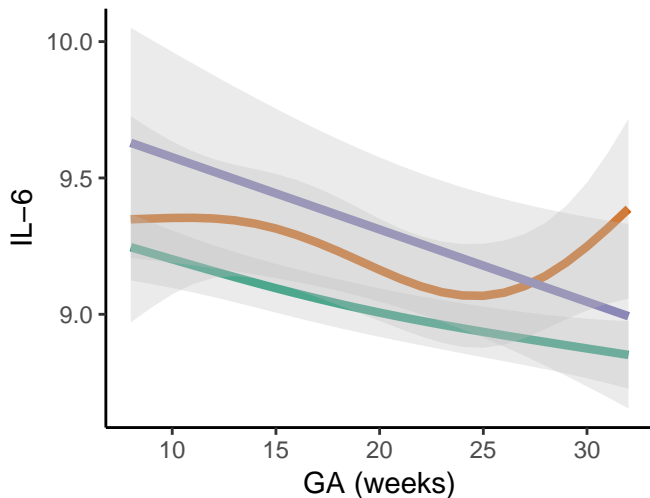

Group control PE

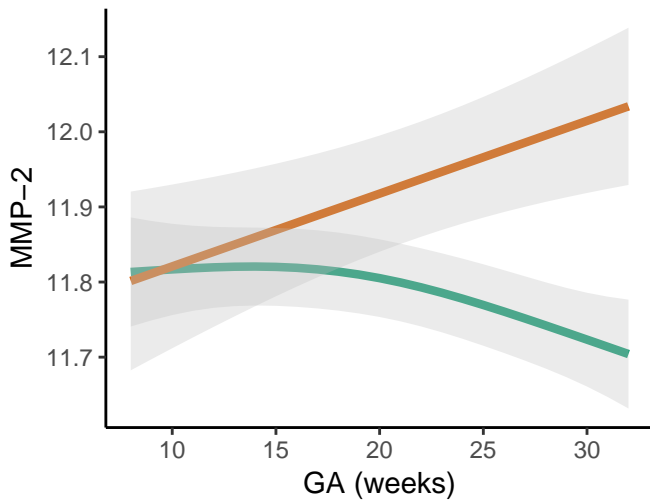

Group control mild PE severe PE

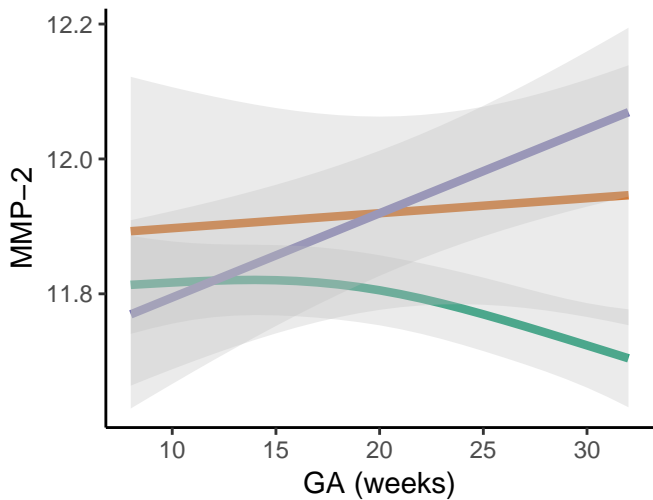

Group control MVM no MVM

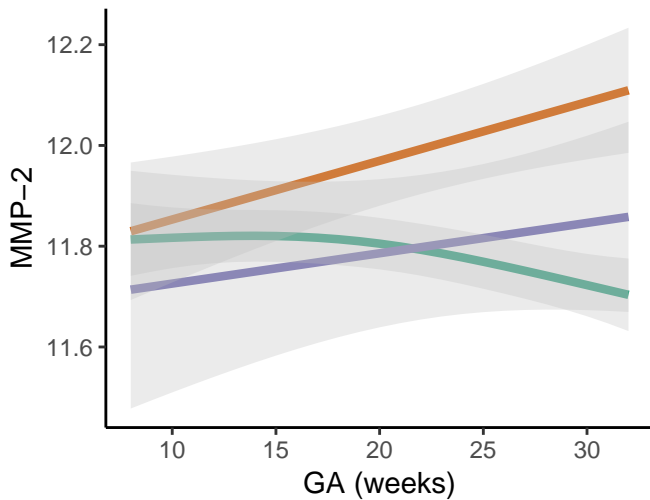



Group control PE

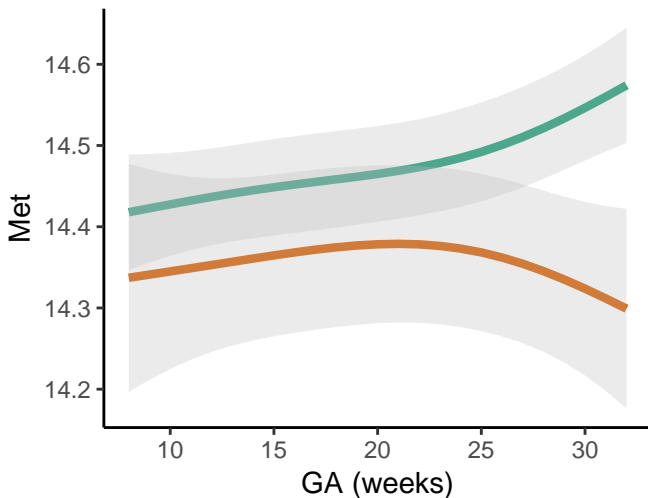

Group control mild PE severe PE

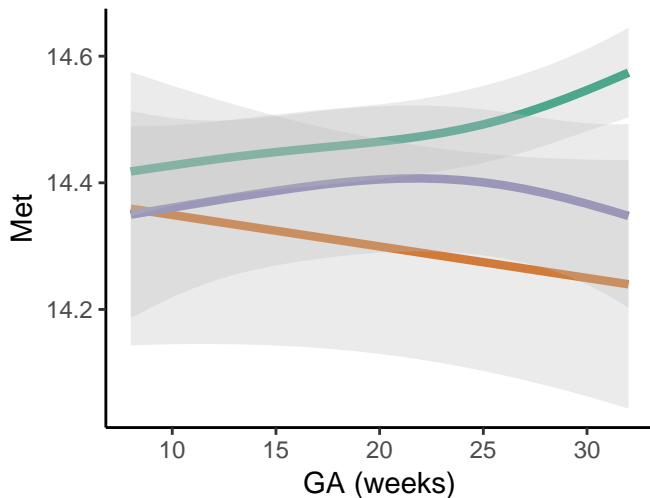

Group control MVM no MVM

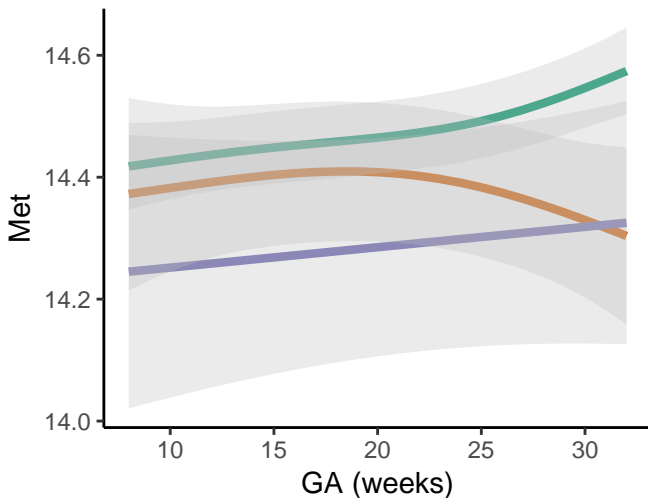

Group control PE

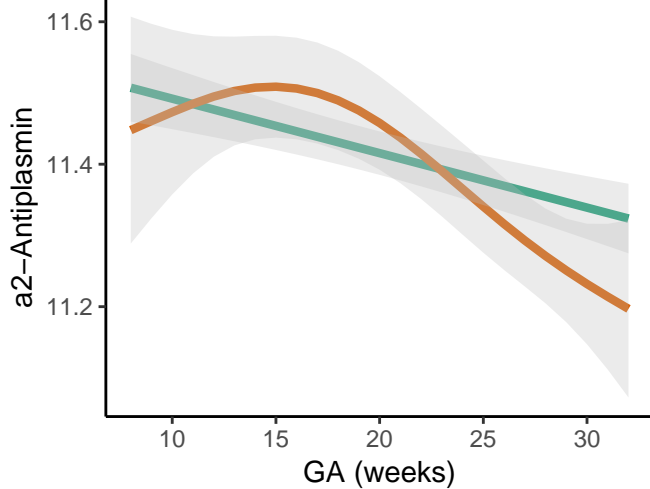

Group control mild PE severe PE

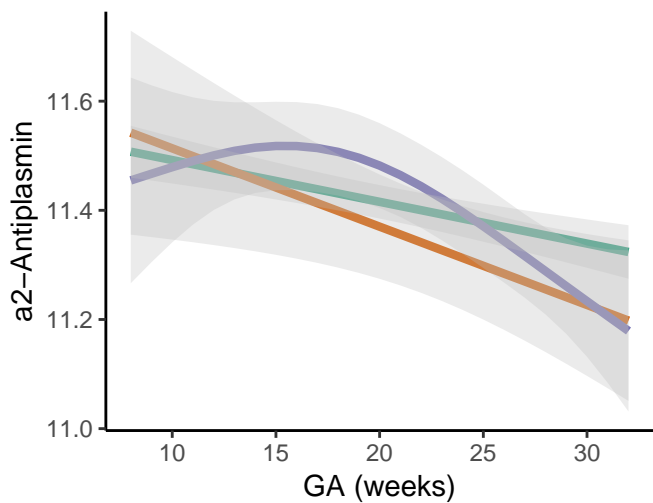

Group control MVM no MVM

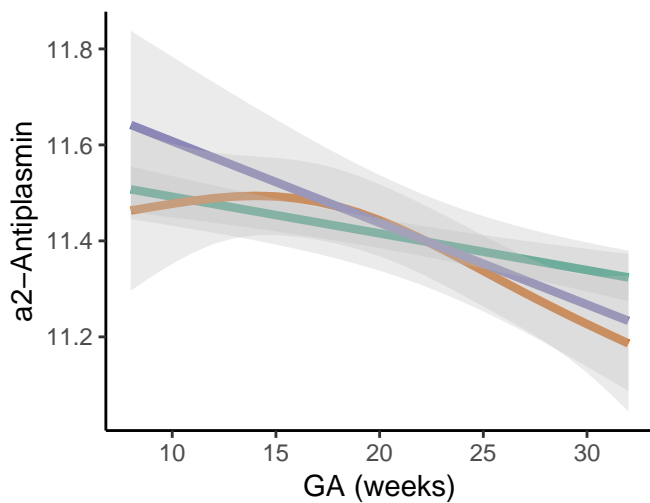

Group control PE

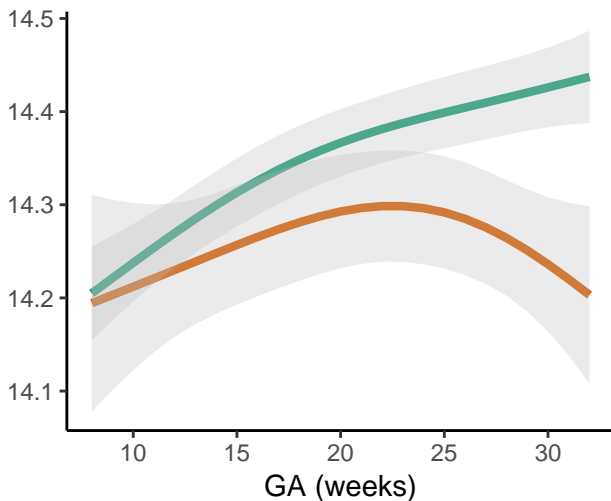

Group control mild PE severe PE

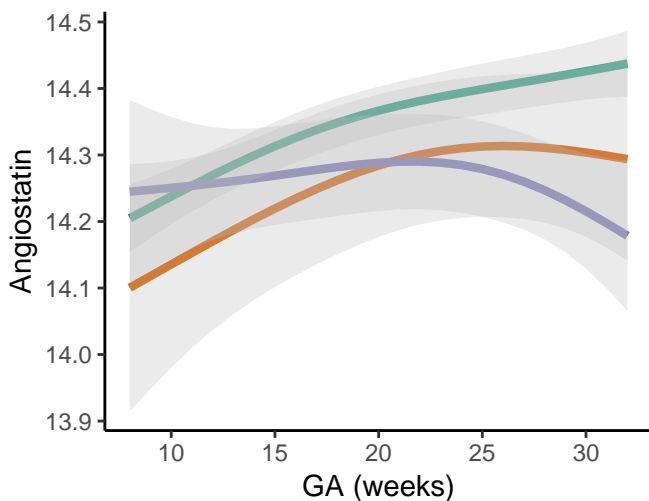

Group control MVM no MVM

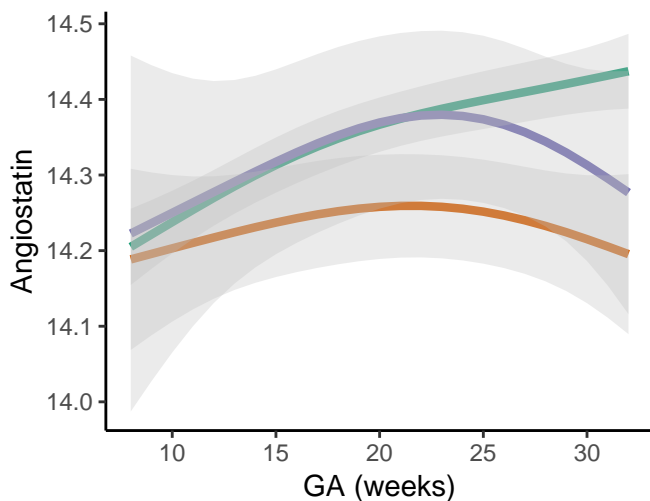

Group control PE

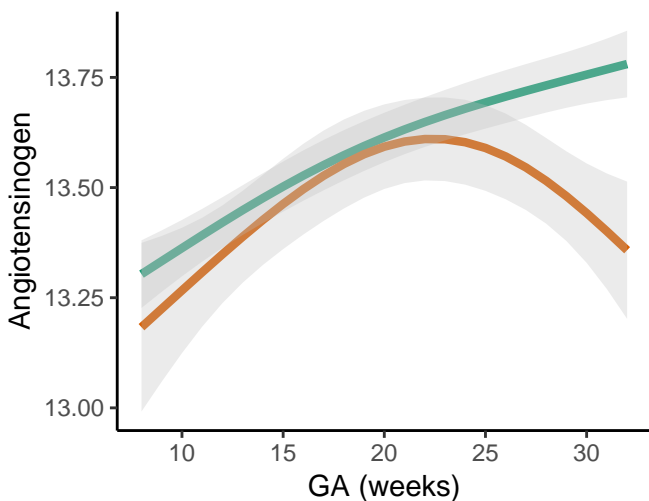

Group control mild PE severe PE

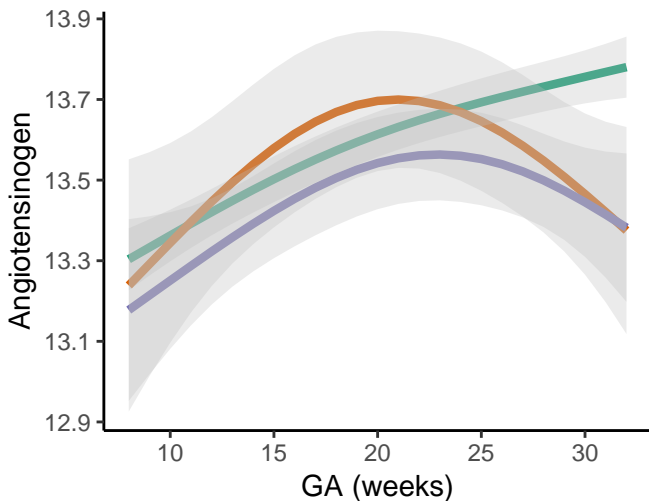

Group control MVM no MVM

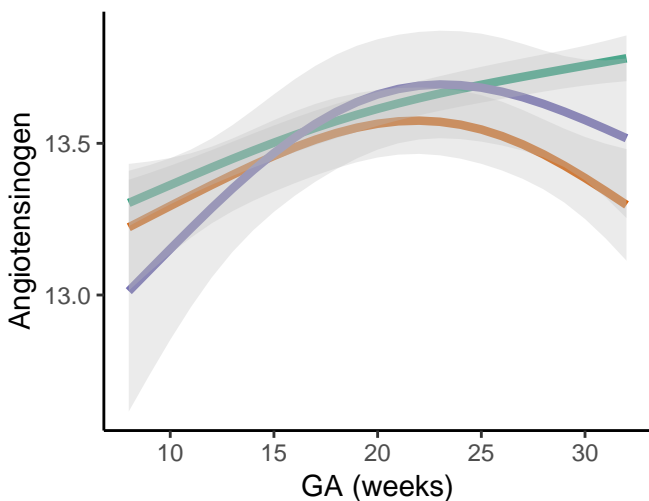

Group control PE

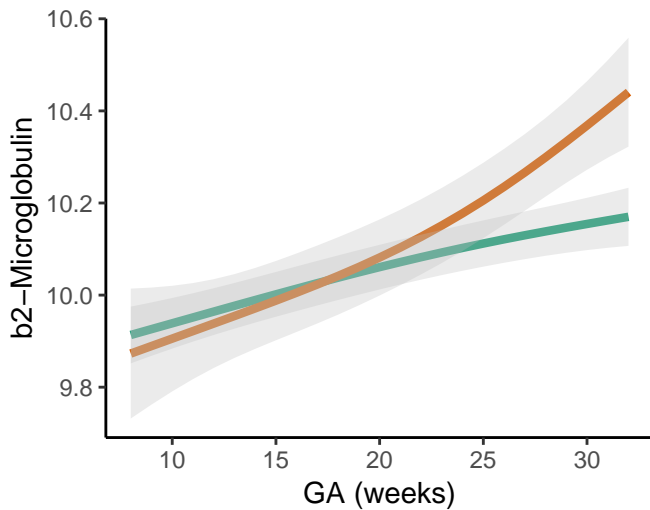

Group control mild PE severe PE

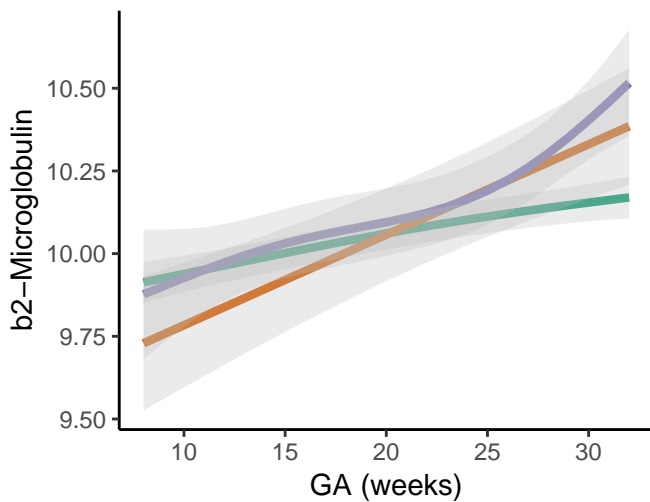

Group control MVM no MVM

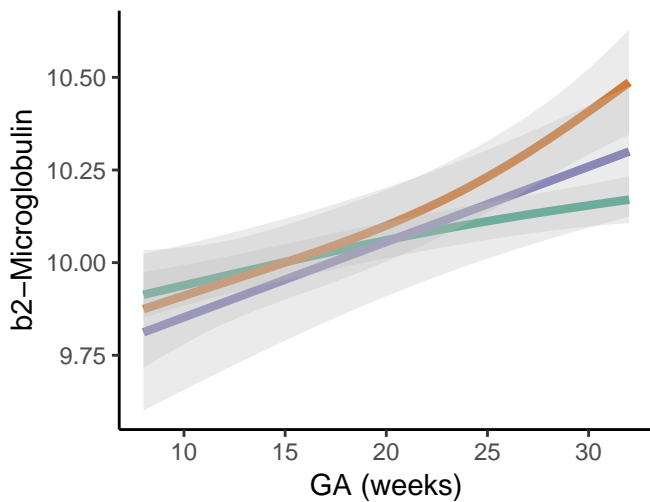

Group control PE

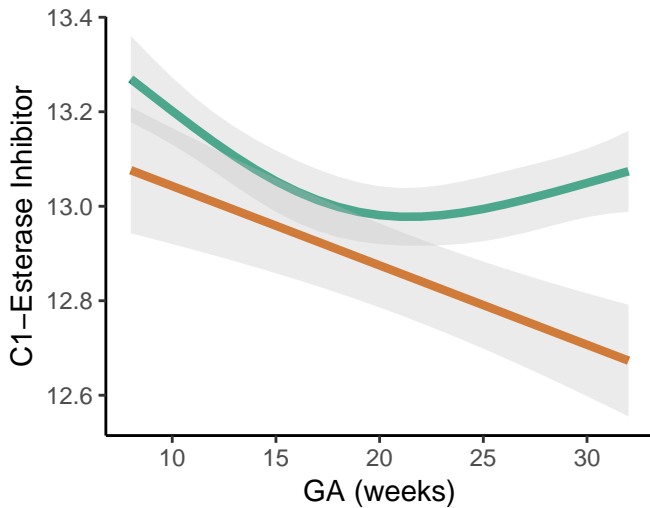

Group control mild PE severe PE

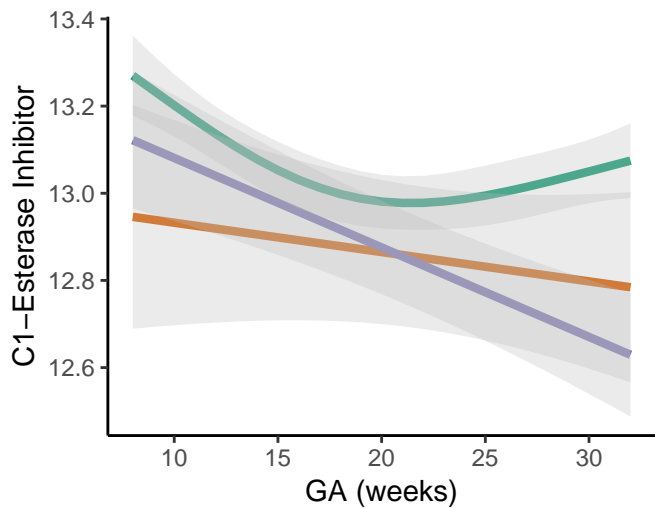

Group control MVM no MVM

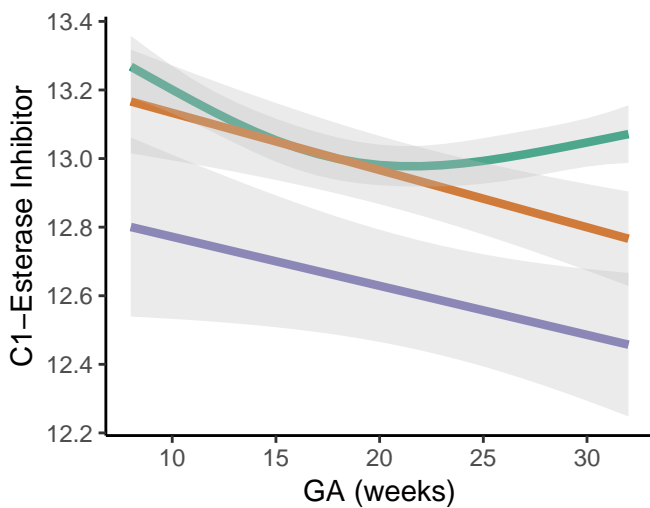

Group control PE

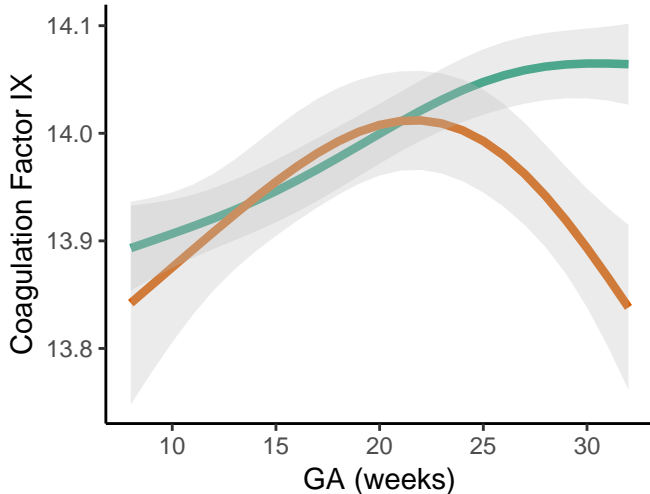

Group control mild PE severe PE

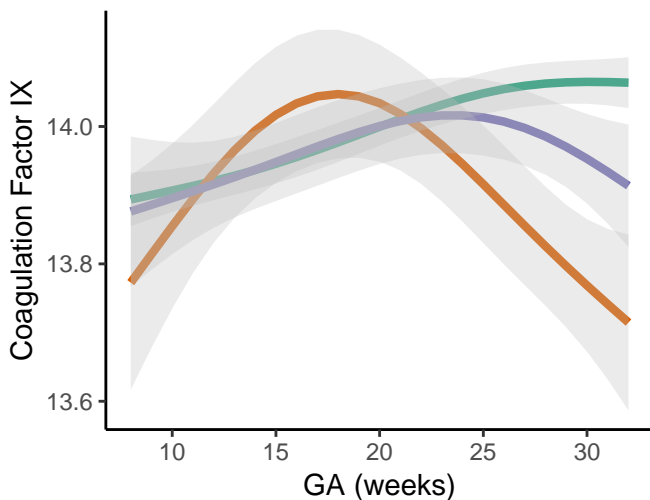

Group control MVM no MVM

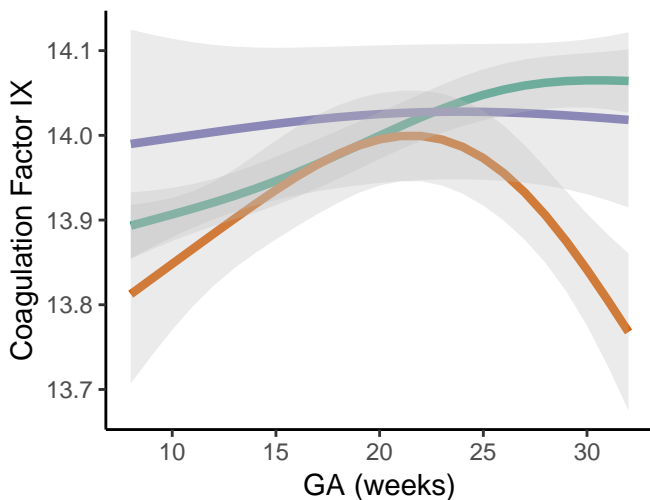

Group control PE

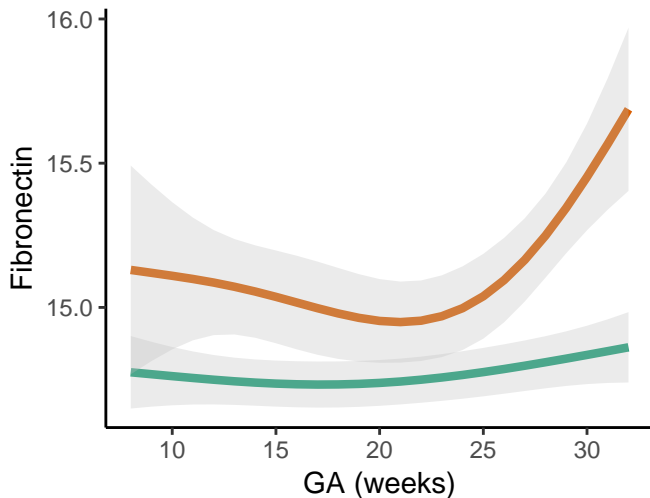

Group control mild PE severe PE

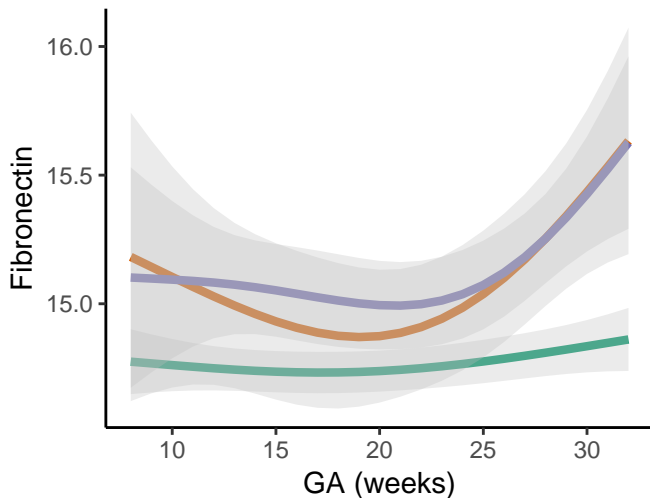

Group control MVM no MVM

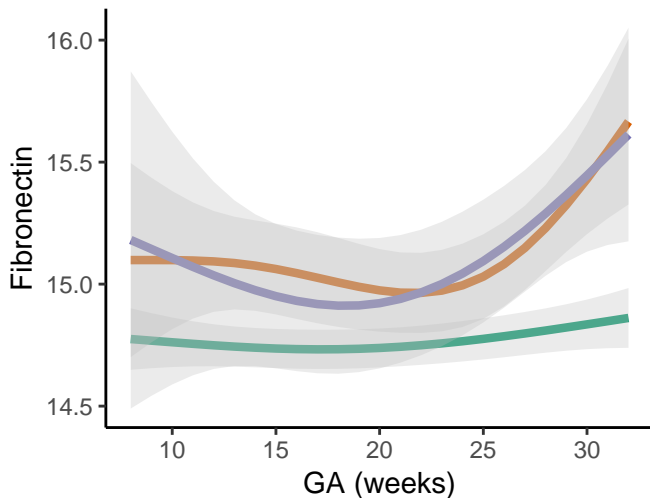



Group control PE

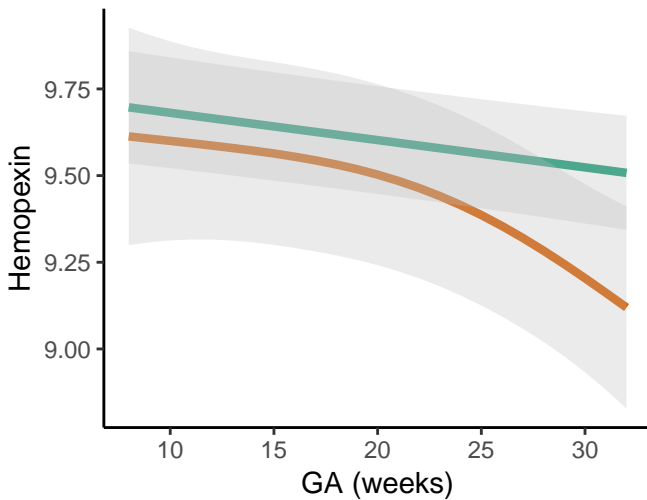

Group control mild PE severe PE

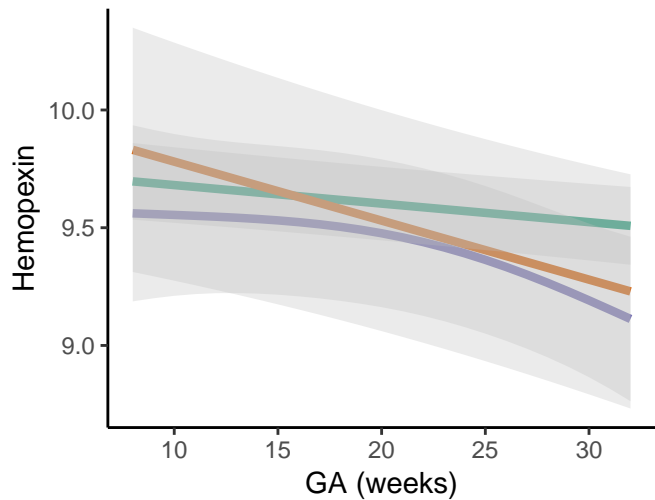

Group control MVM no MVM

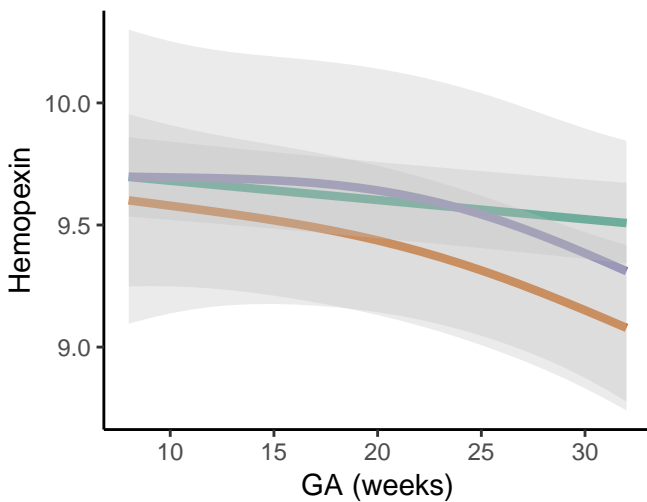

Group control PE

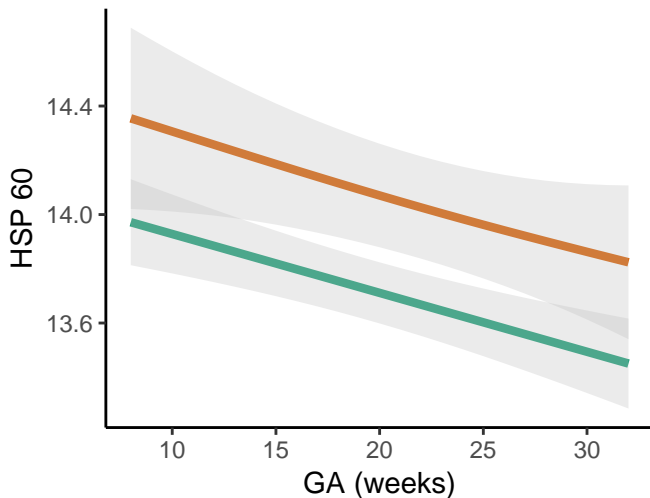

Group control mild PE severe PE

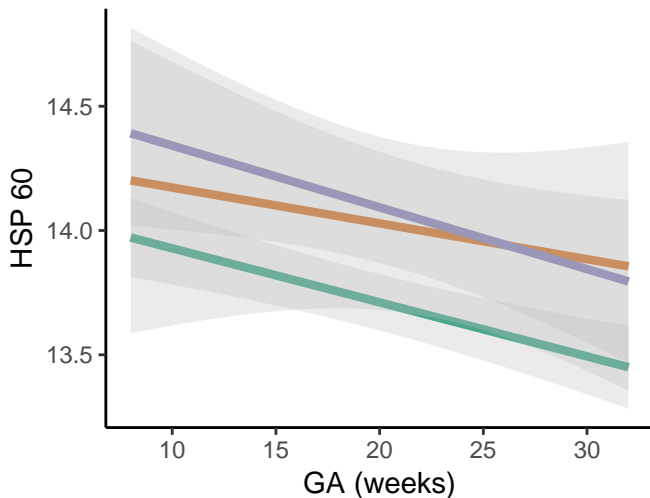

Group control MVM no MVM

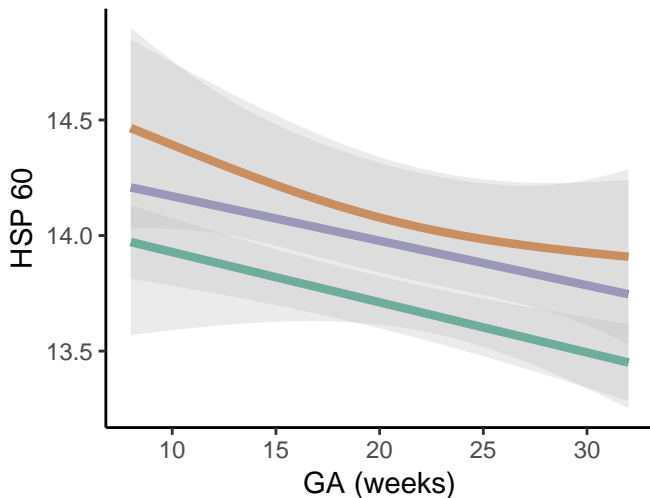

Group control PE

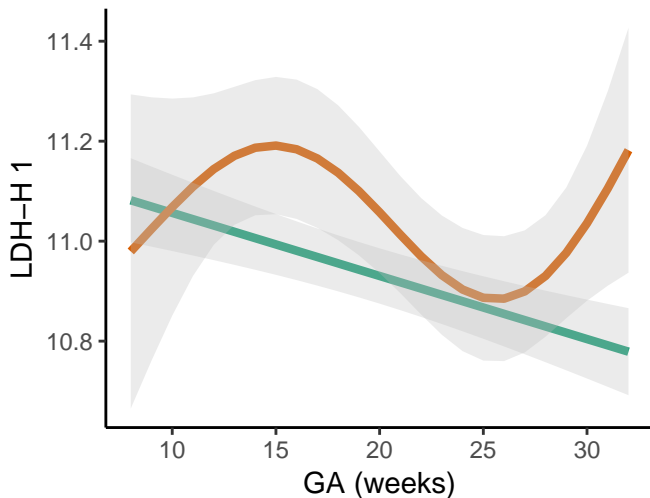

Group control mild PE severe PE

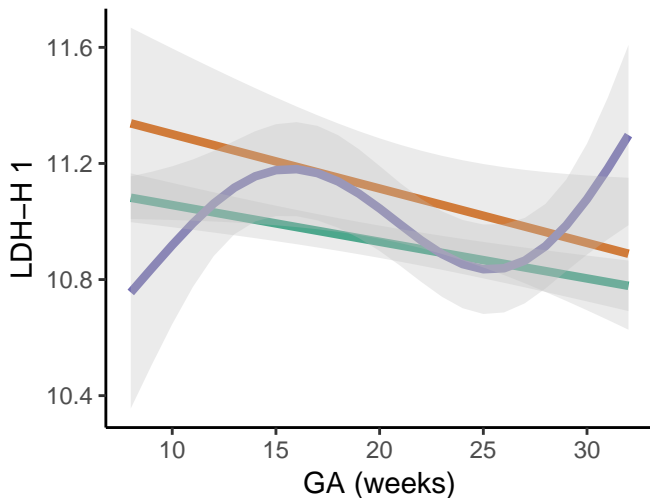

Group control MVM no MVM

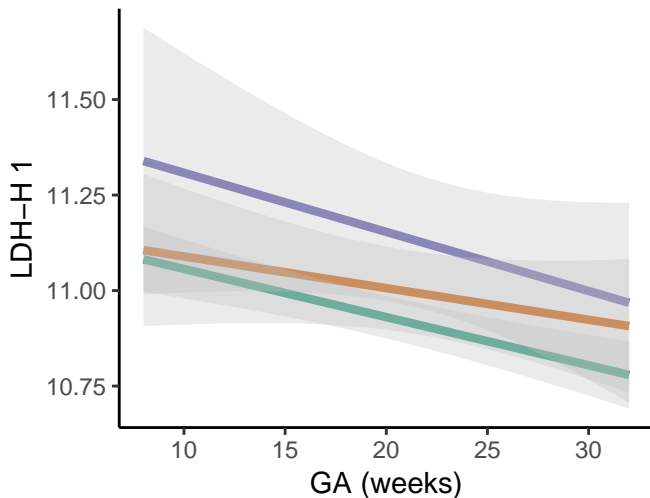

Group control PE

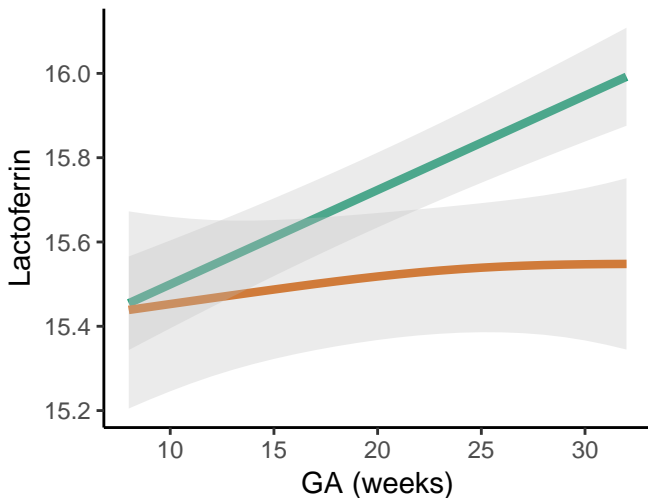

Group control mild PE severe PE

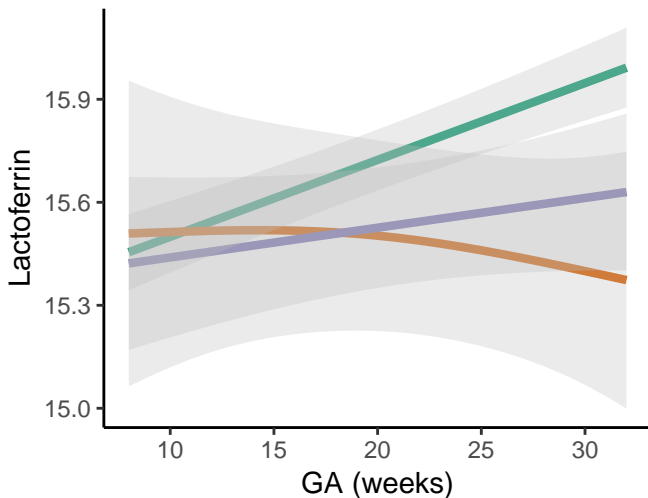

Group control MVM no MVM

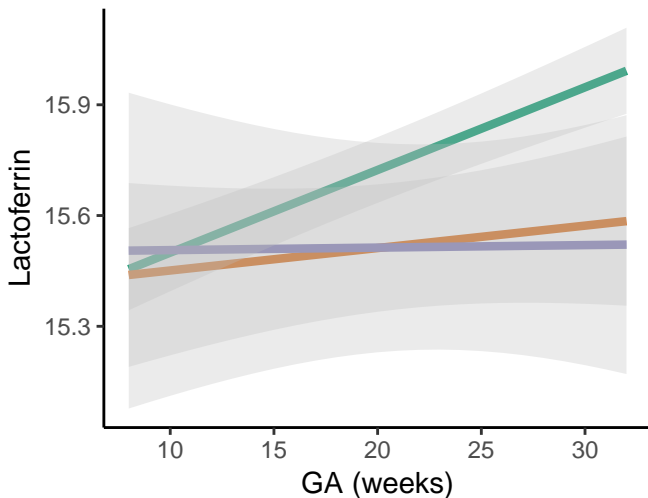

Group control PE

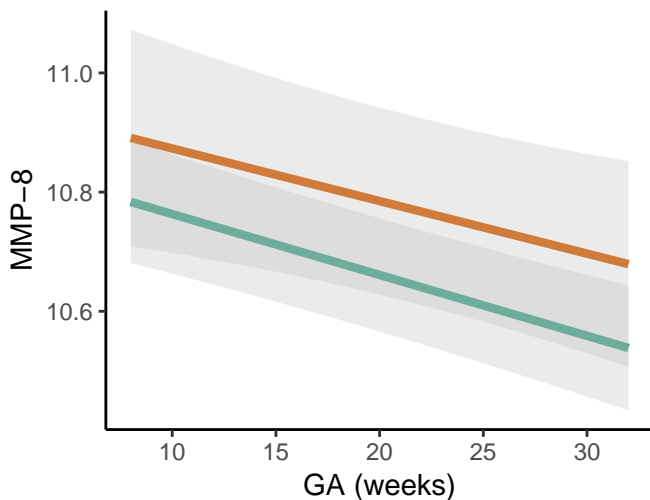

Group control mild PE severe PE

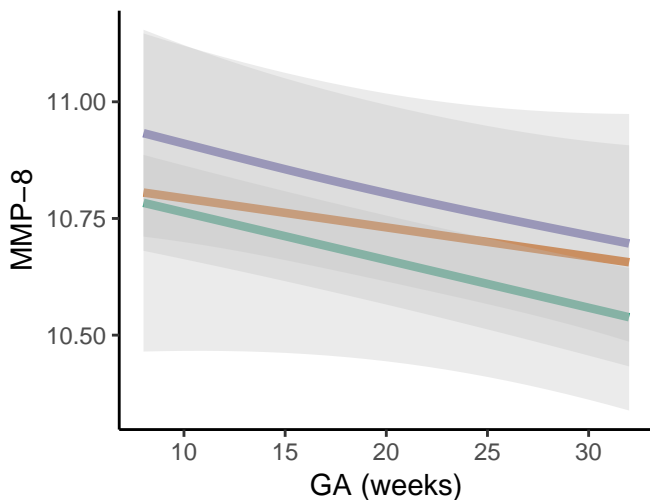

Group control MVM no MVM

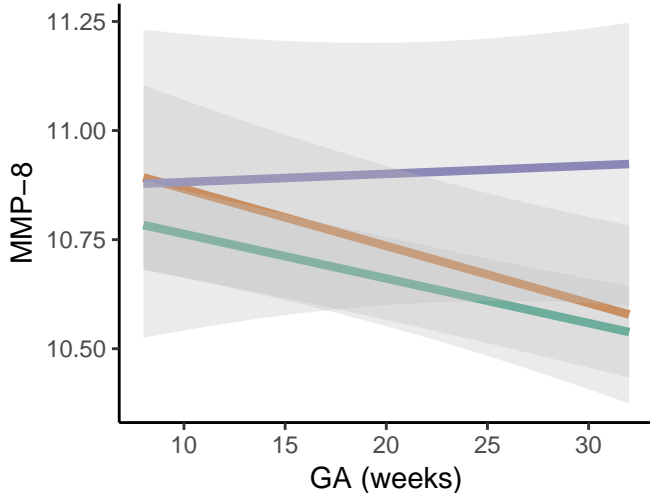

Group control PE

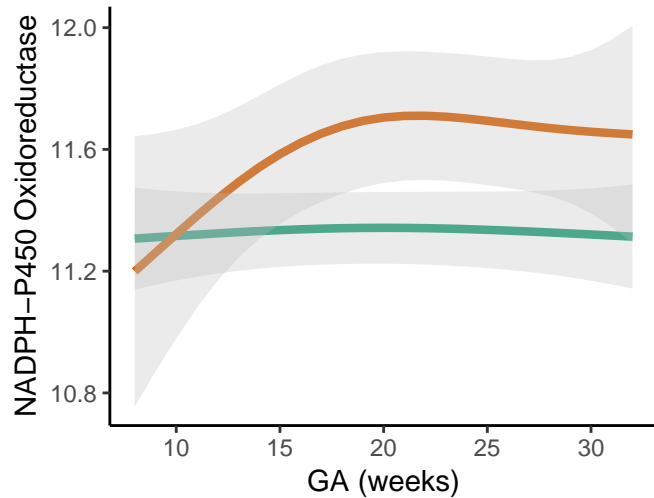

Group control mild PE severe PE

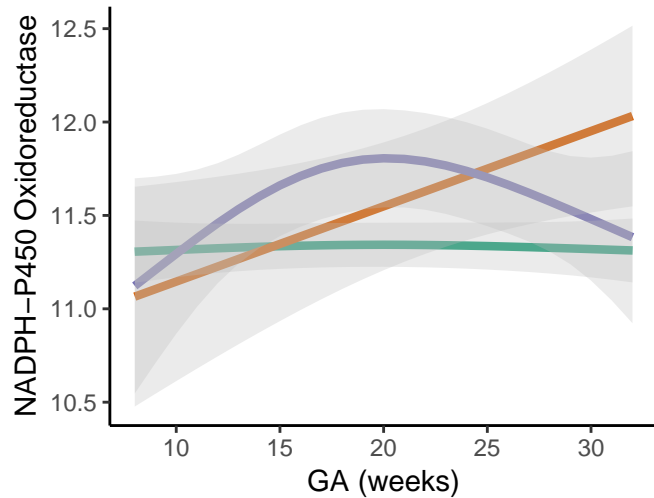

Group control MVM no MVM

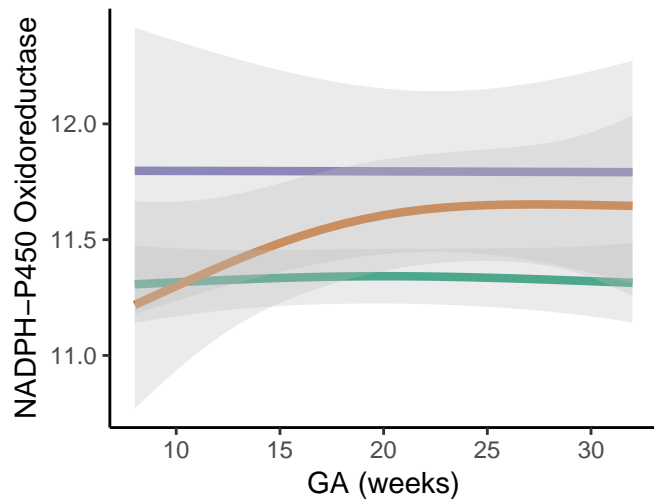

Group control PE

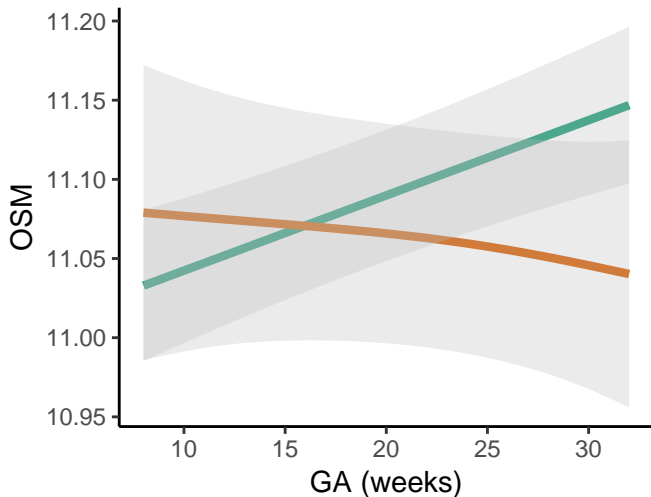

Group control mild PE severe PE

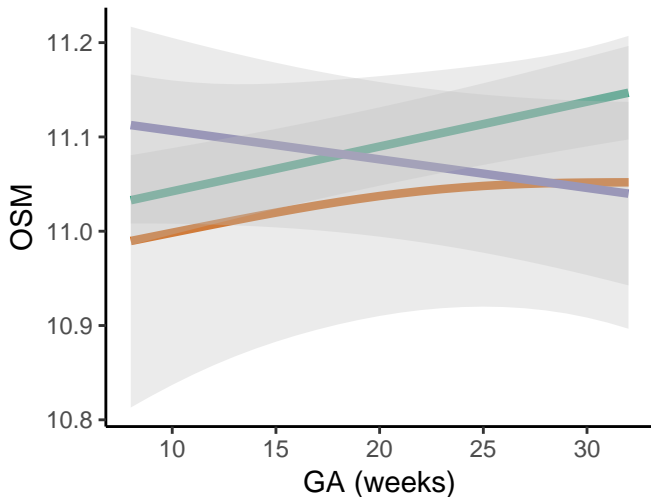

Group control MVM no MVM

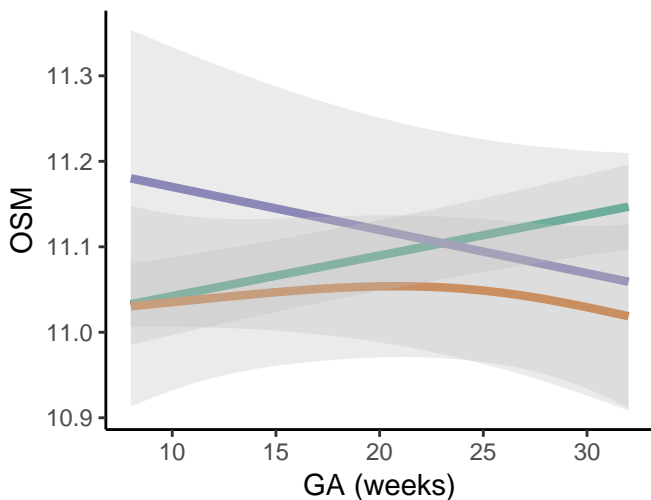

Group control PE

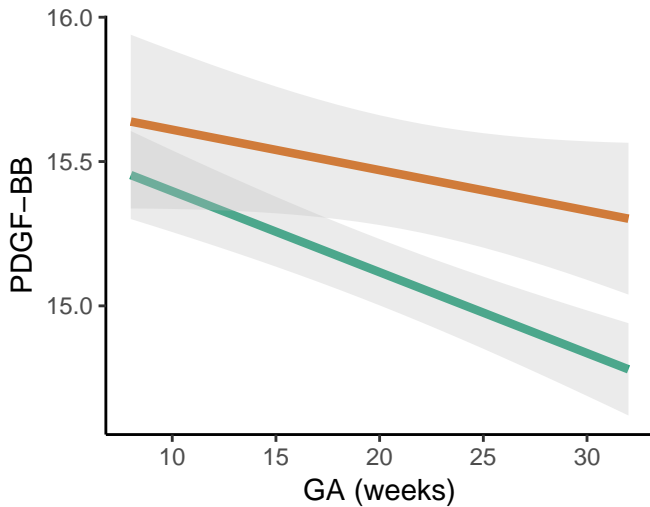

Group control mild PE severe PE

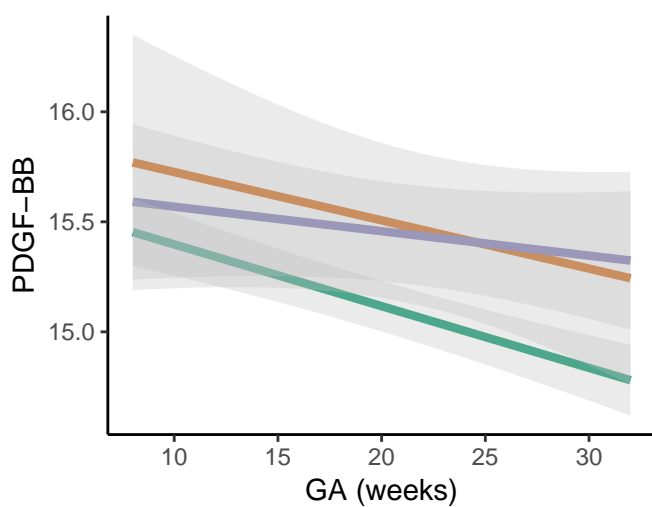

Group control MVM no MVM

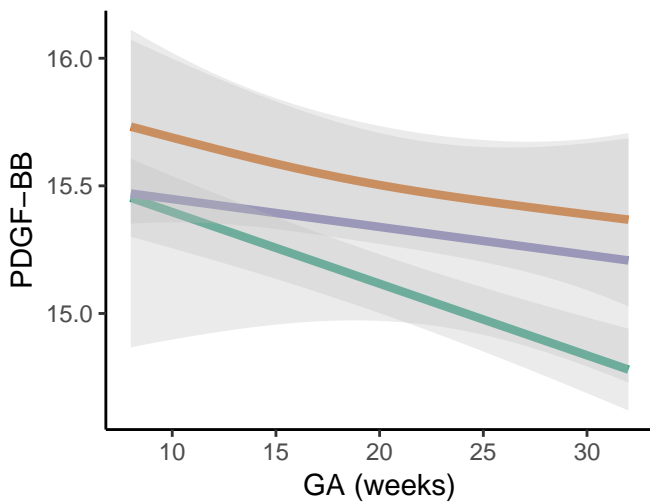



Group control PE

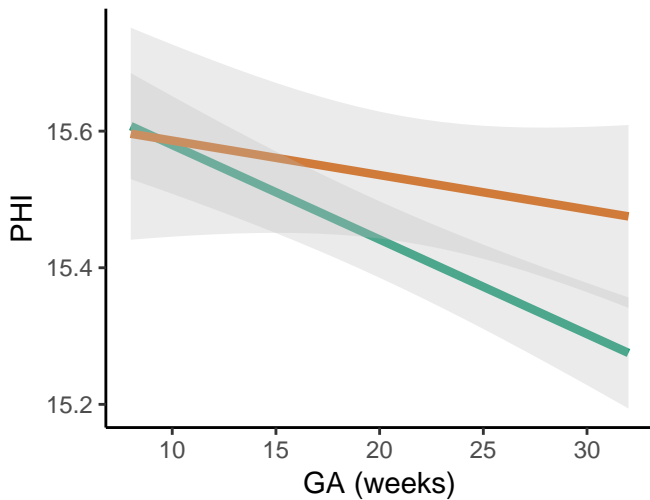

Group control mild PE severe PE

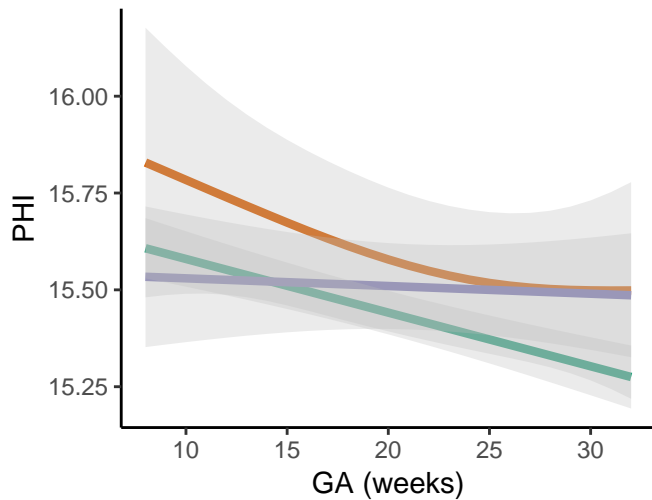

Group control MVM no MVM

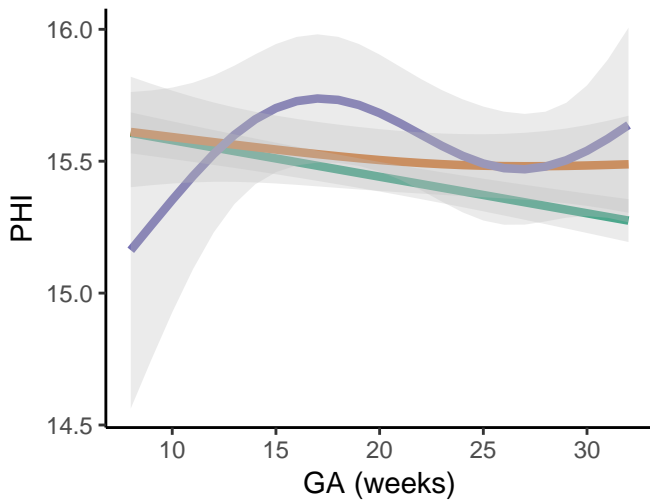

Group control PE

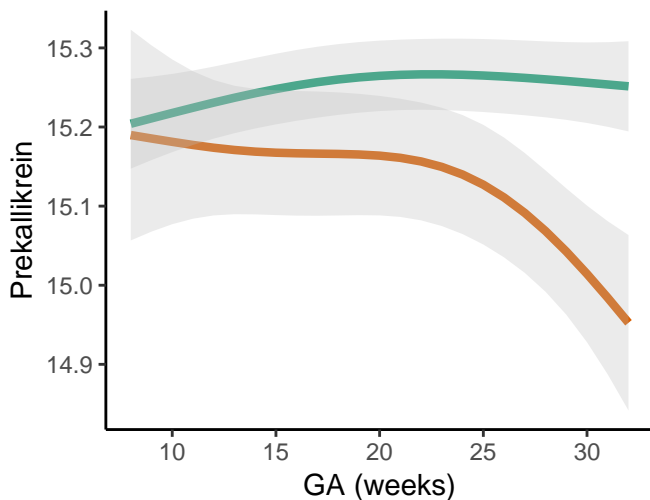

Group control mild PE severe PE

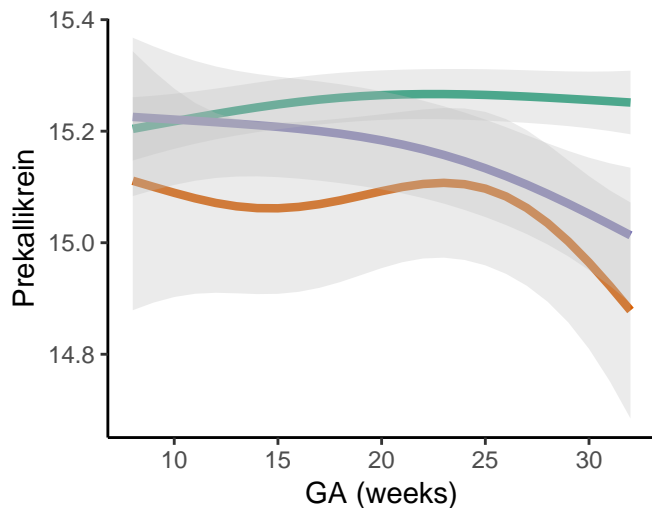

Group control MVM no MVM

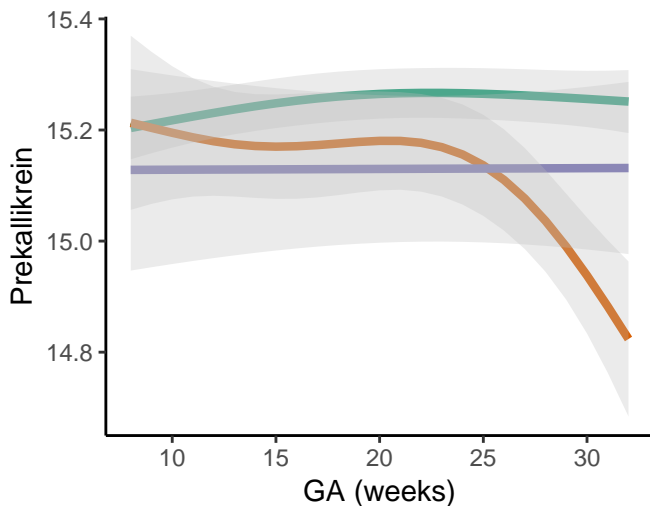

Group control PE

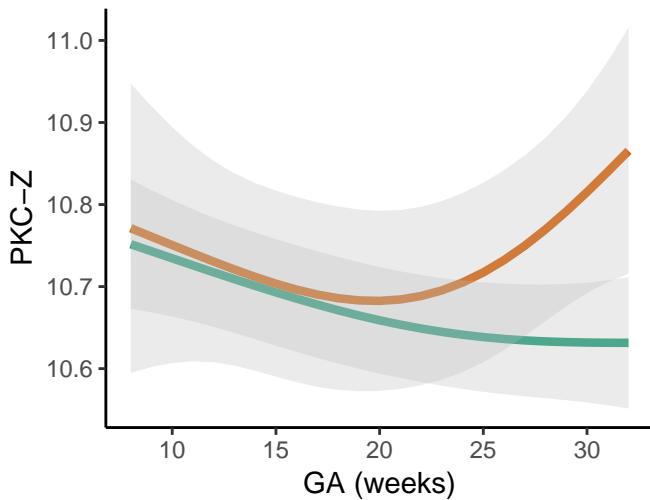

Group control mild PE severe PE

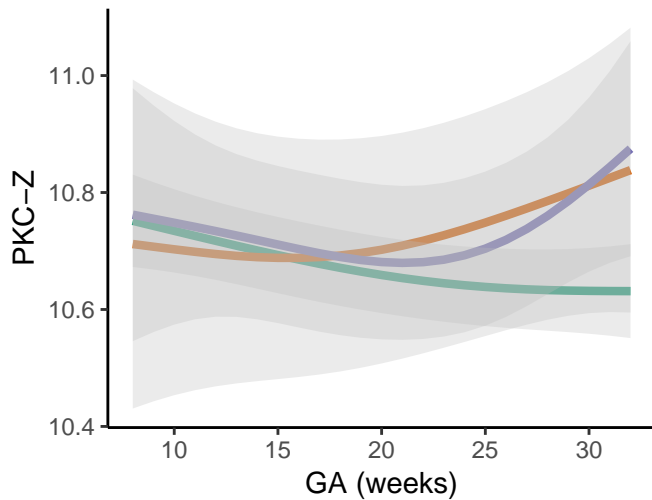

Group control MVM no MVM

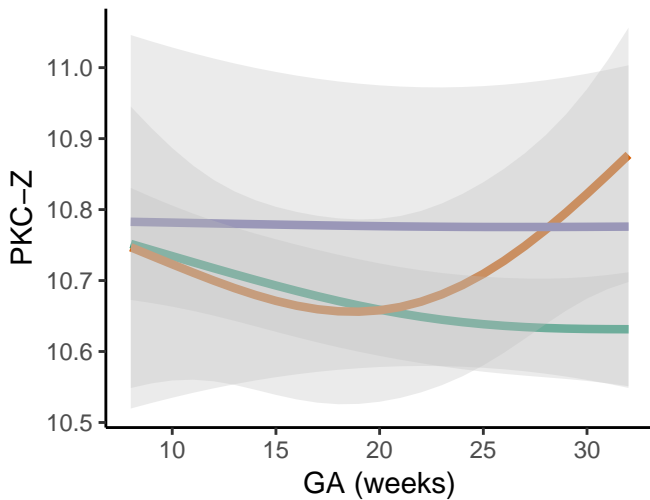

Group control PE

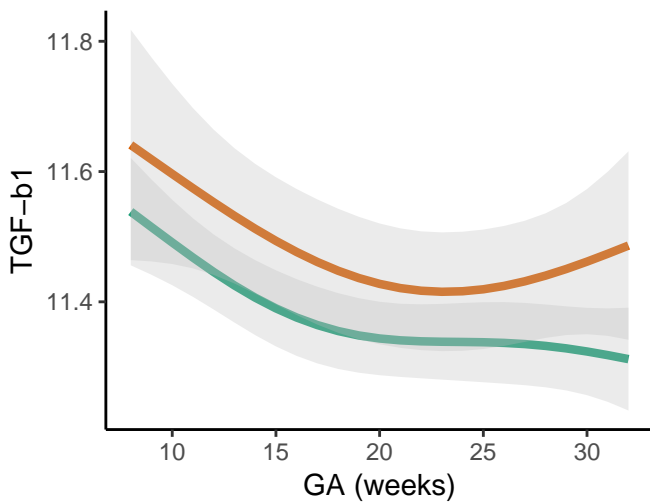

Group control mild PE severe PE

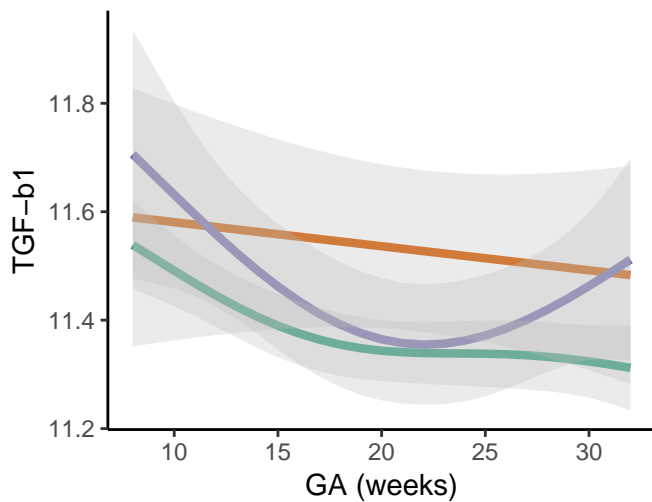

Group control MVM no MVM

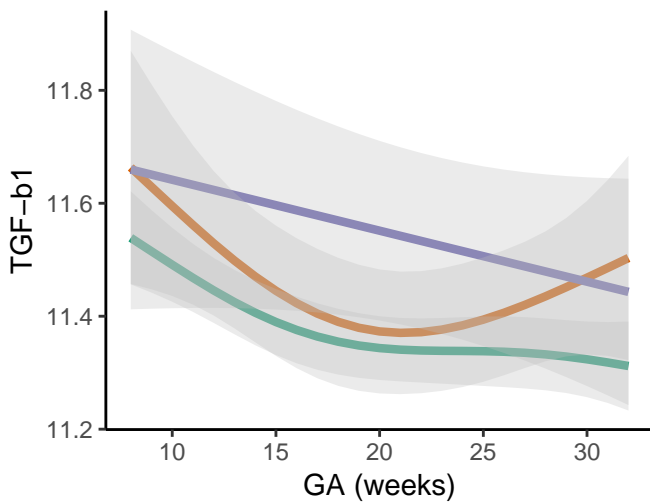

Group control PE

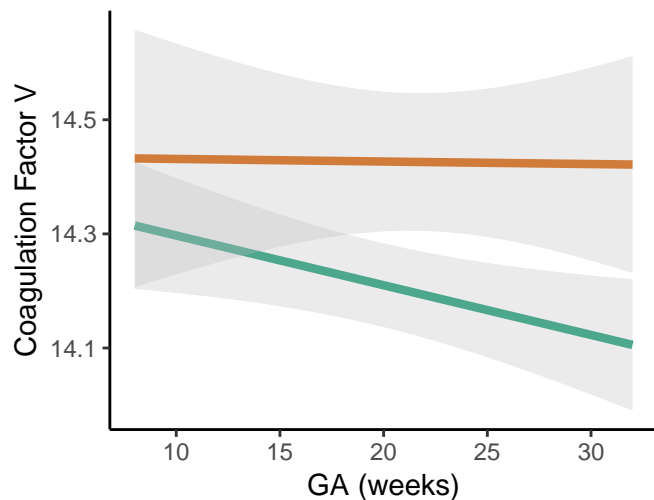

Group control mild PE severe PE

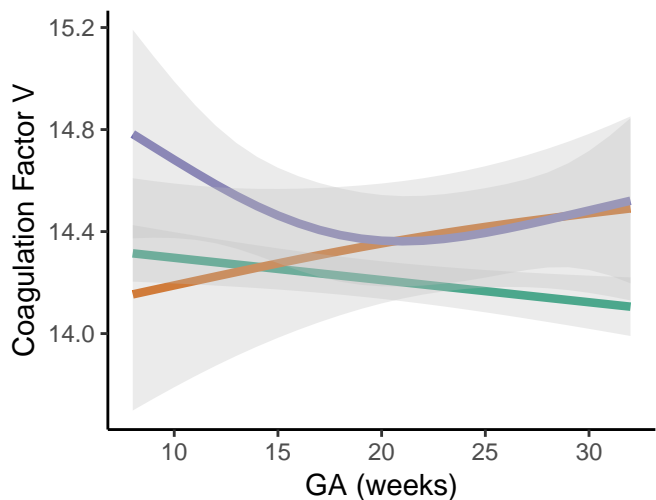

Group control MVM no MVM

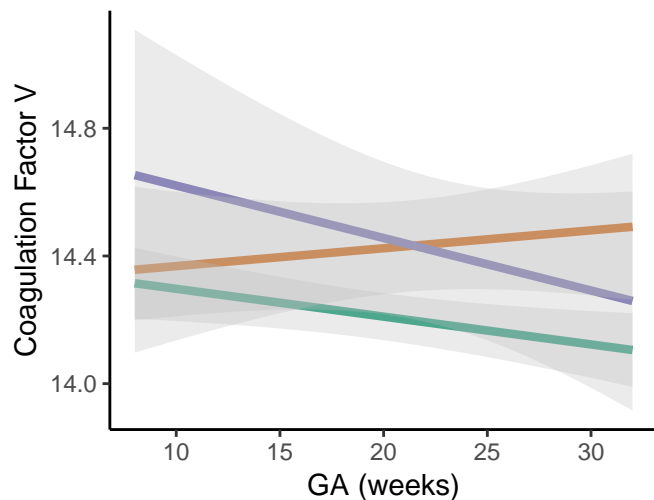

Group control PE

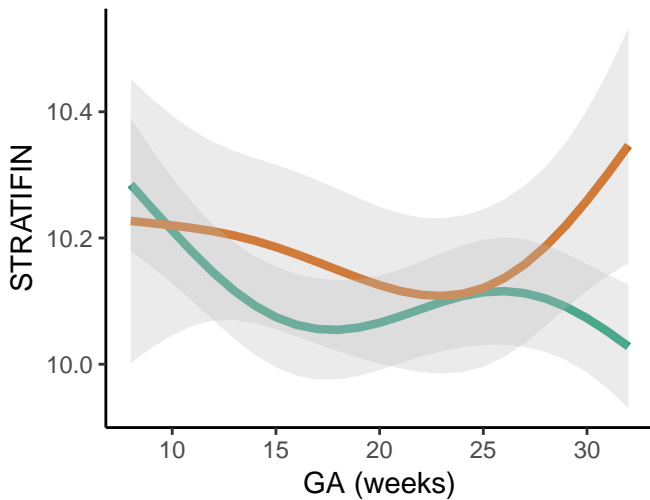

Group control mild PE severe PE

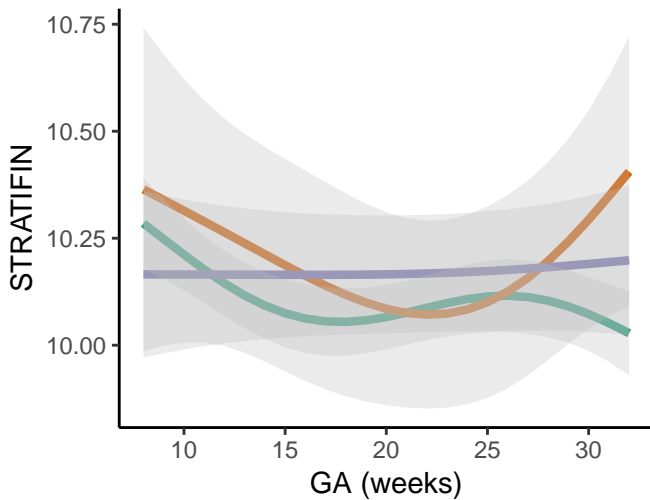

Group control MVM no MVM

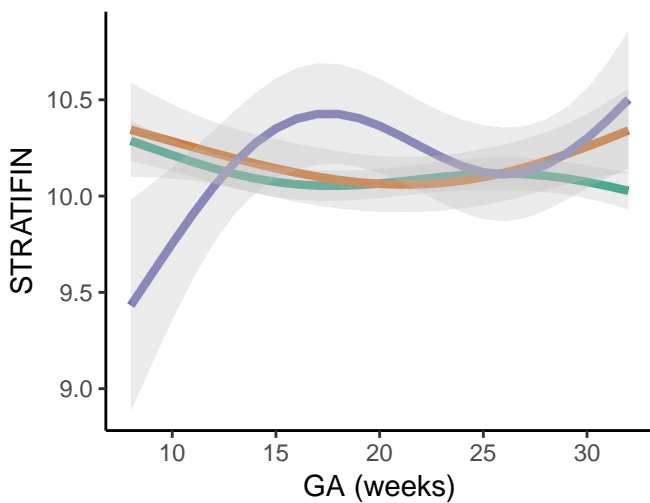

Group control PE

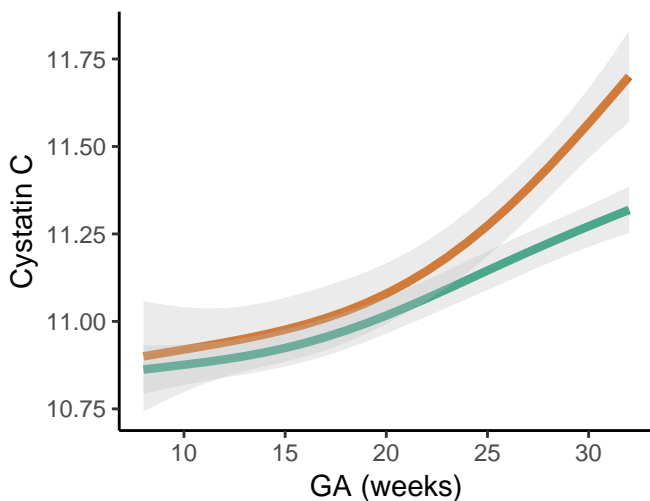

Group control mild PE severe PE

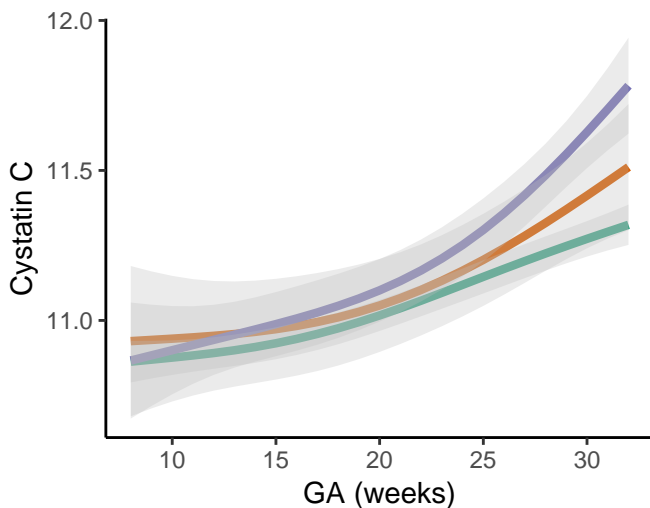

Group control MVM no MVM

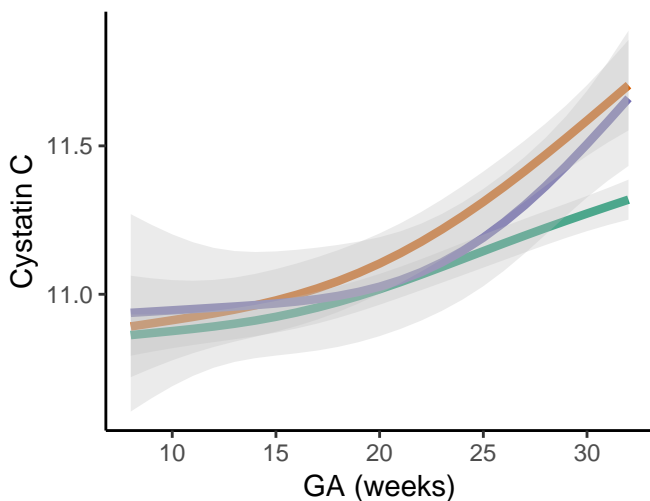

Group control PE

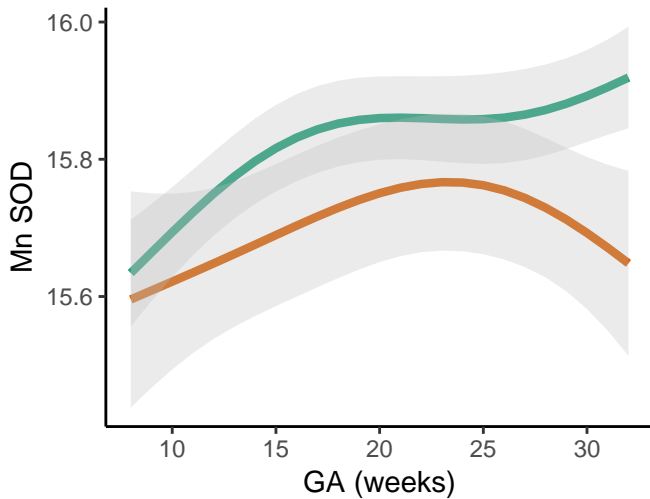

Group control mild PE severe PE

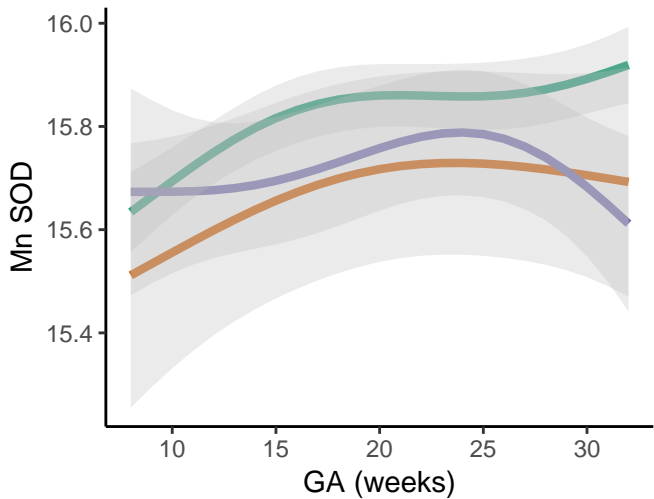

Group control MVM no MVM

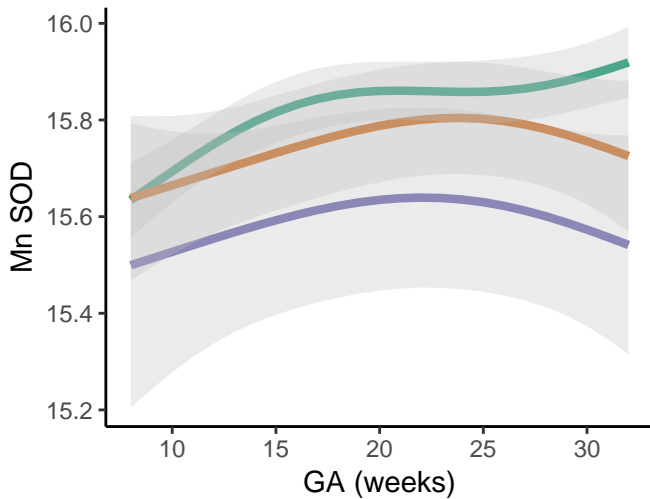



Group control PE

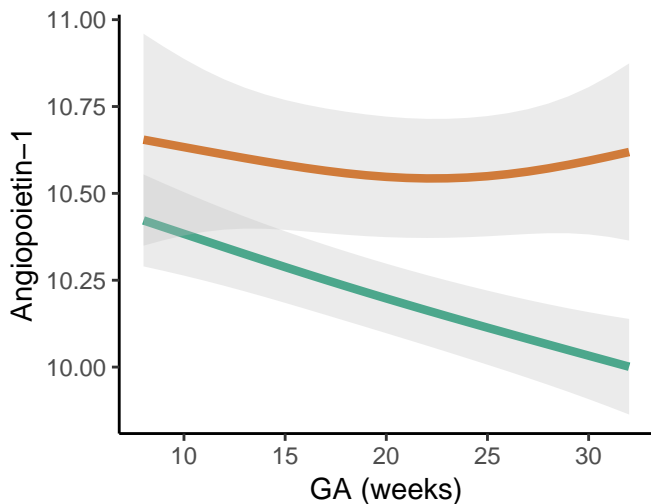

Group control mild PE severe PE

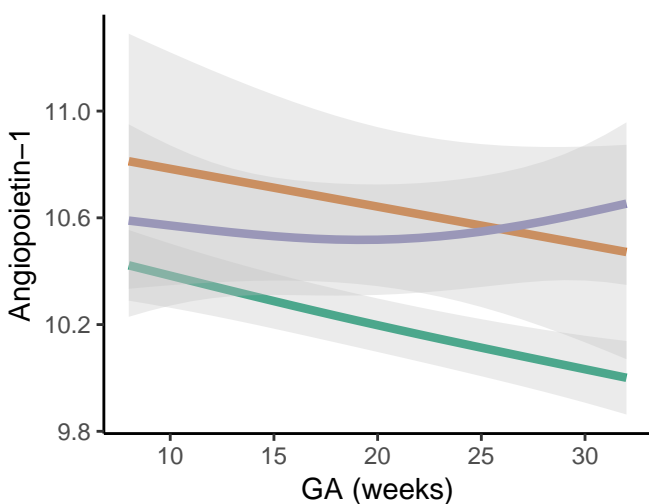

Group control MVM no MVM

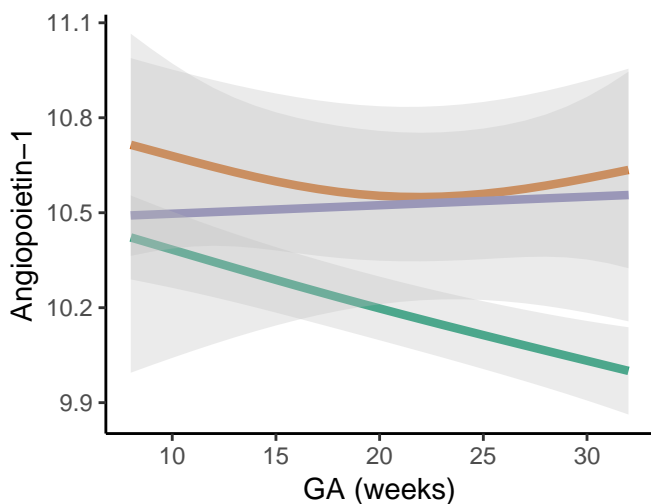

Group control PE

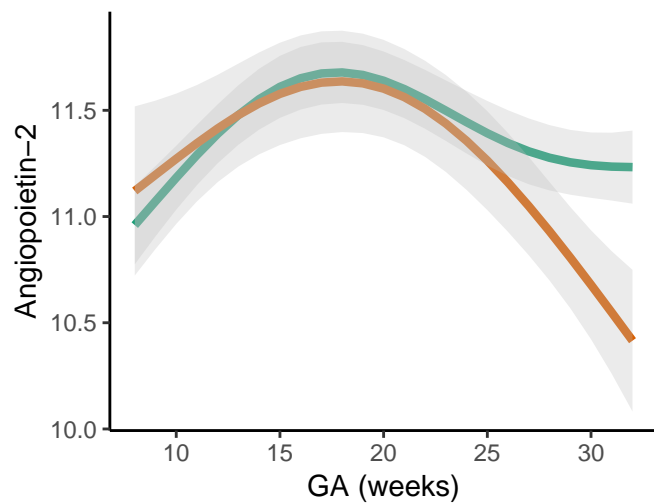

Group control mild PE severe PE

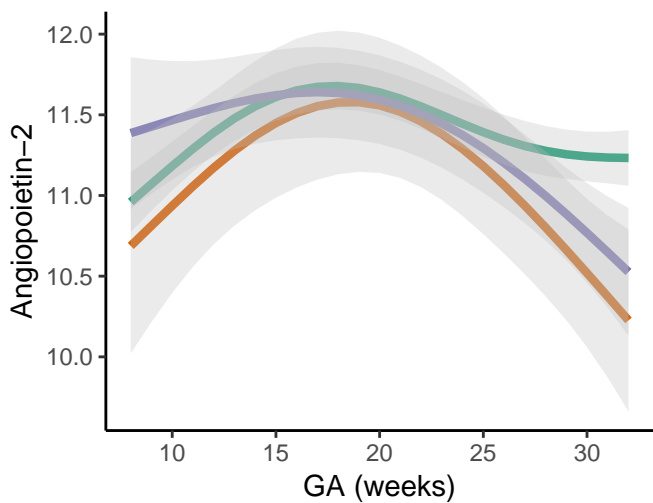

Group control MVM no MVM

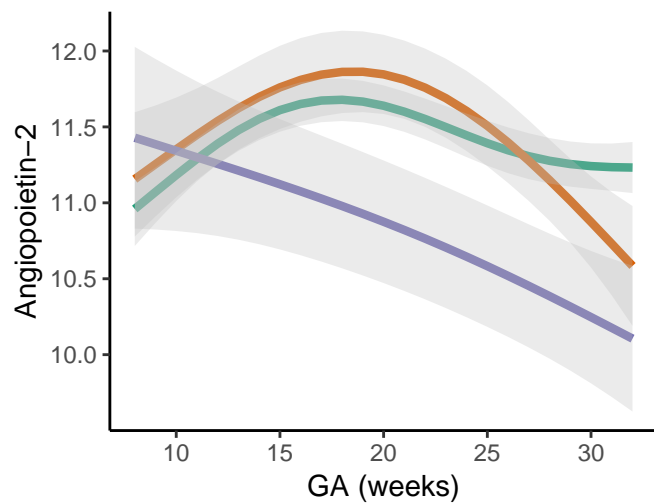

Group control PE

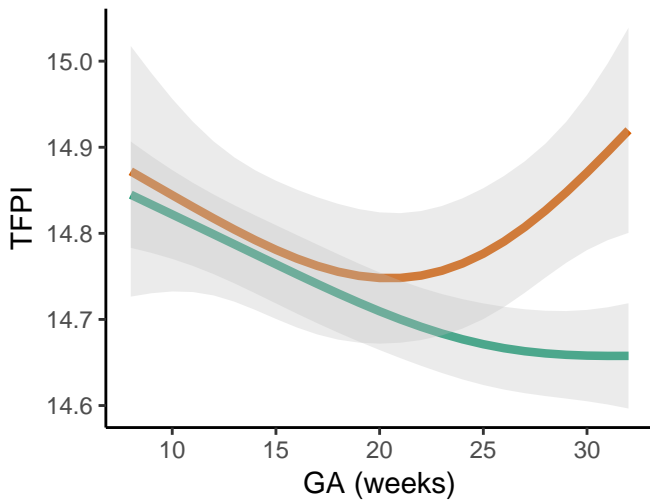

Group control mild PE severe PE

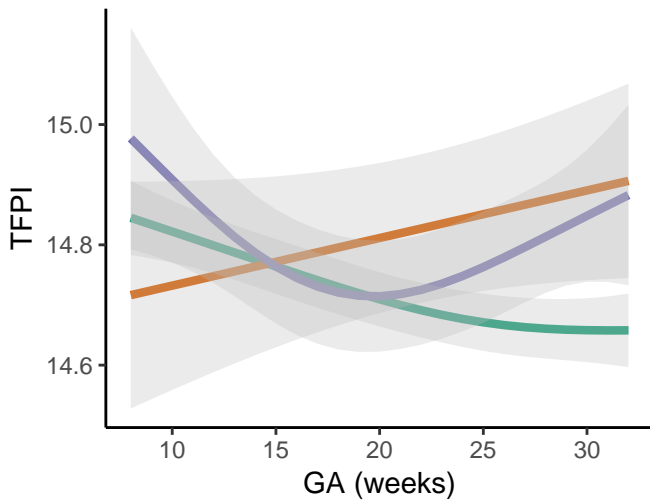

Group control MVM no MVM

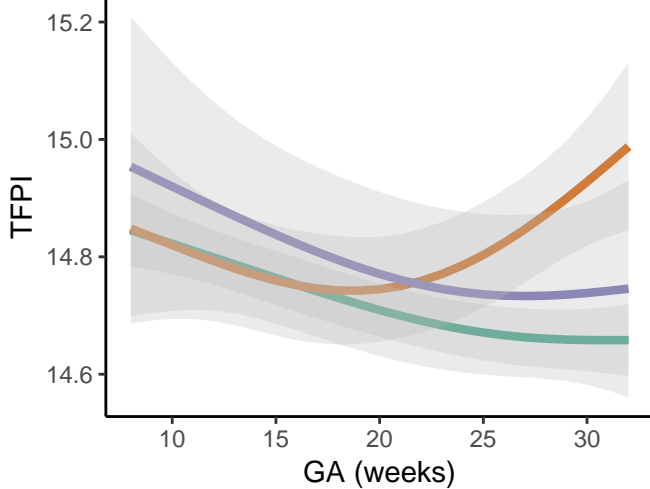

Group control PE

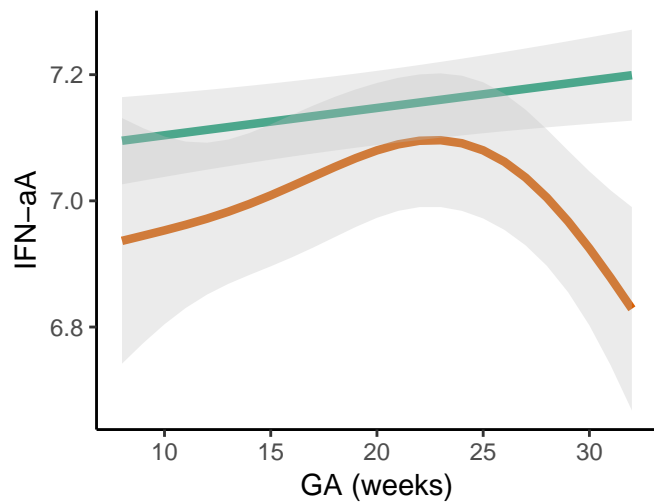

Group control mild PE severe PE

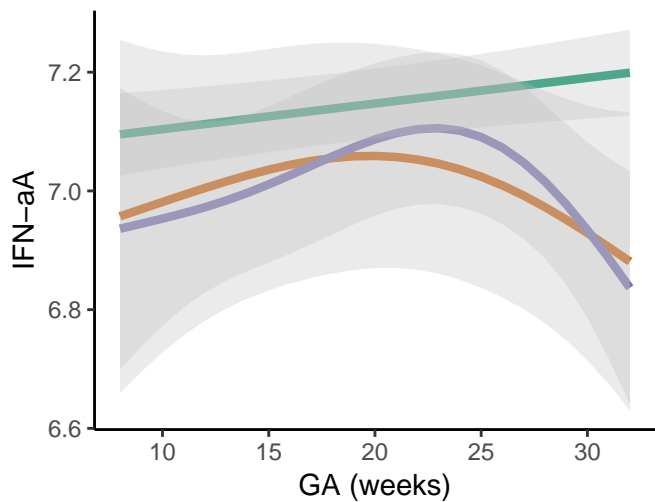

Group control MVM no MVM

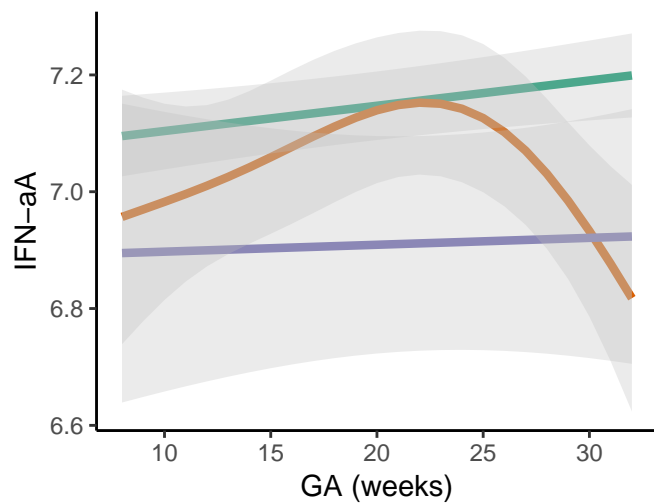

Group control PE

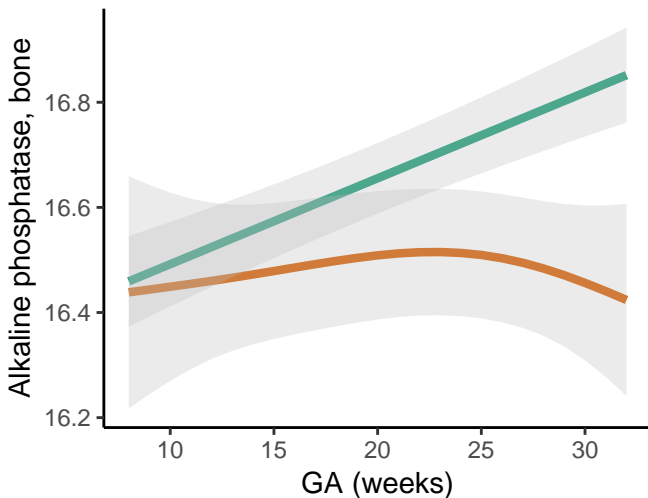

Group control mild PE severe PE

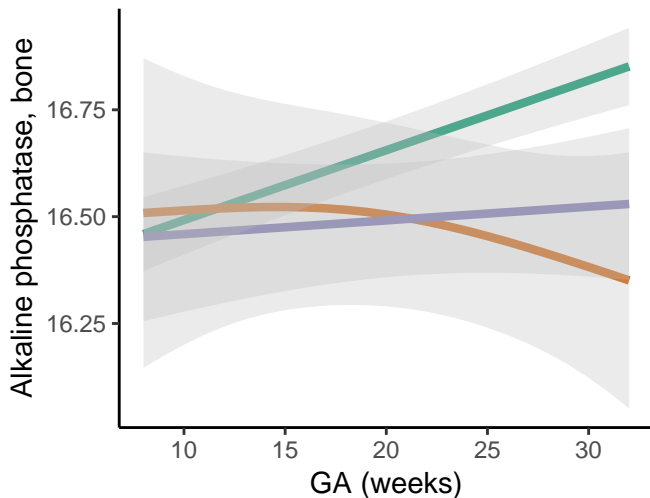

Group control MVM no MVM

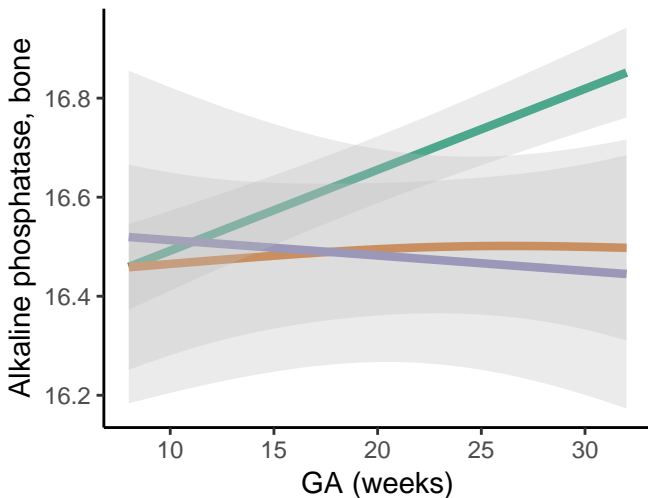

Group control PE

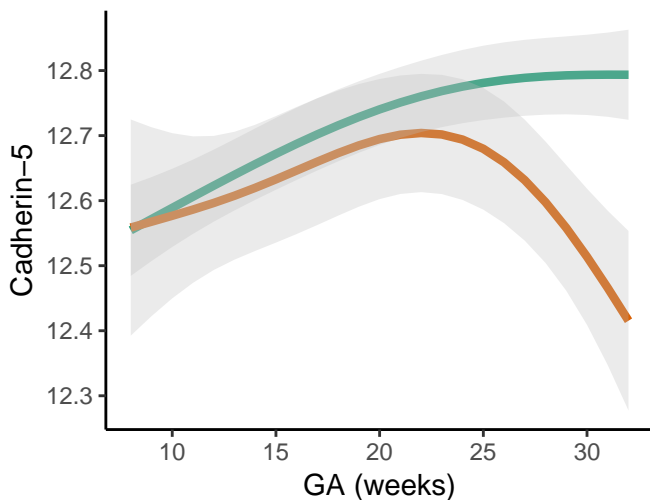

Group control mild PE severe PE

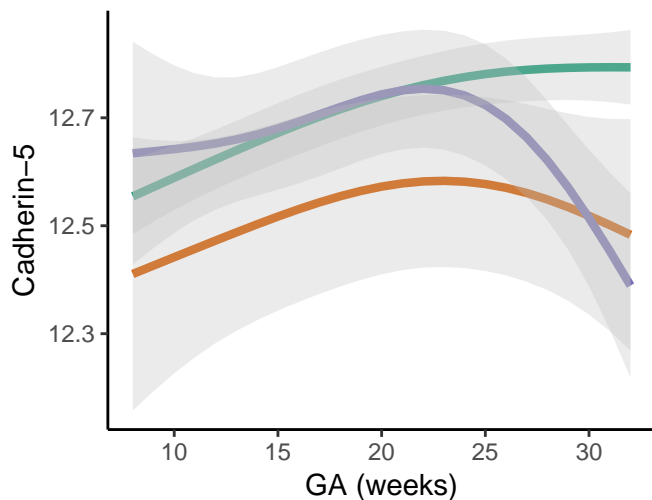

Group control MVM no MVM

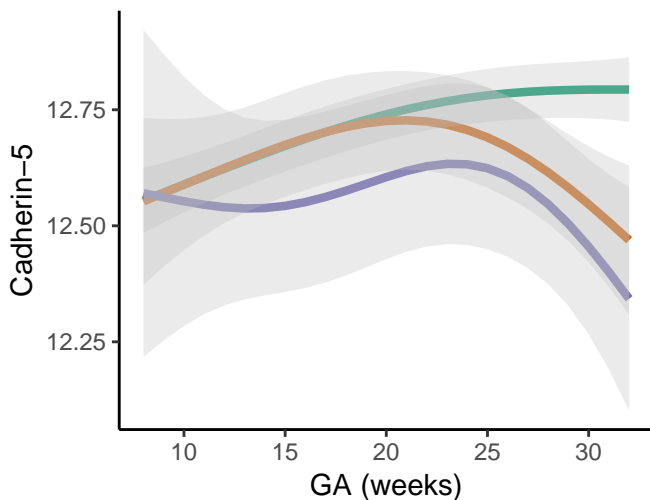

Group control PE

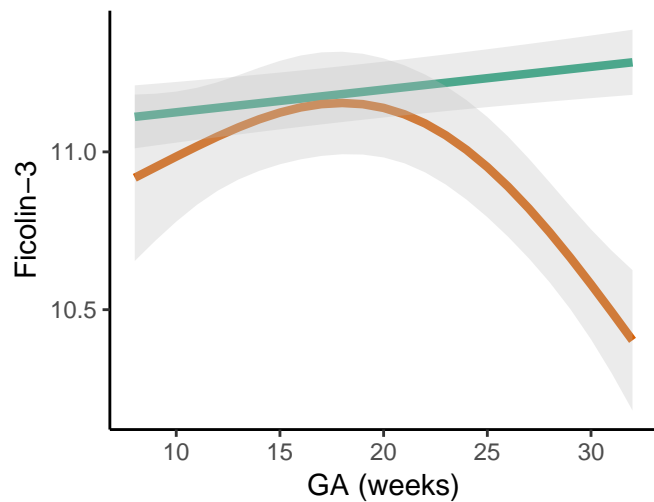

Group control mild PE severe PE

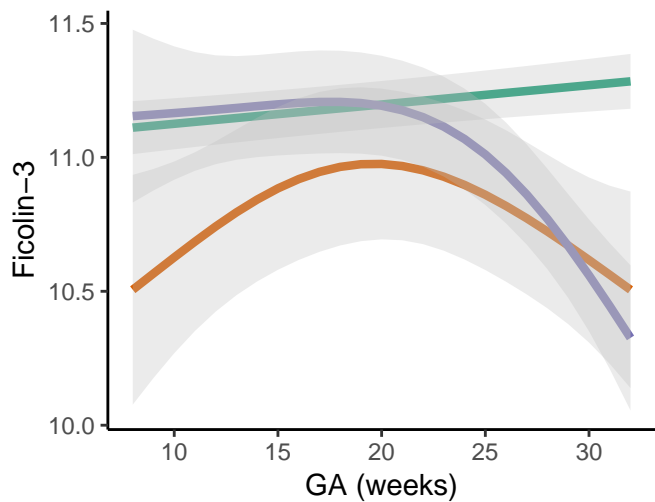

Group control MVM no MVM

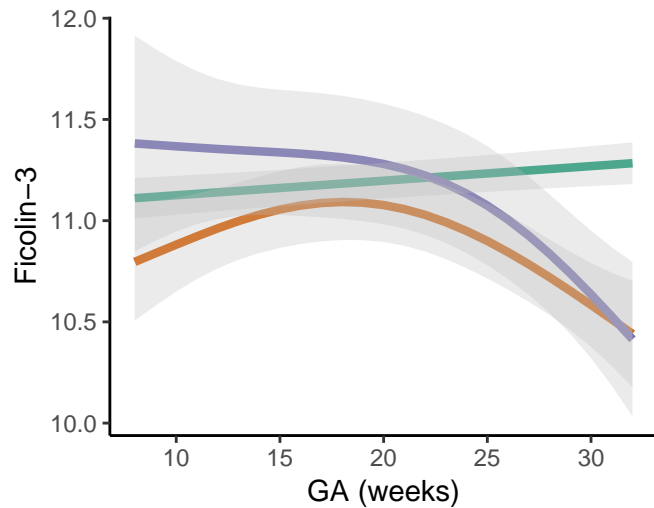

Group control PE

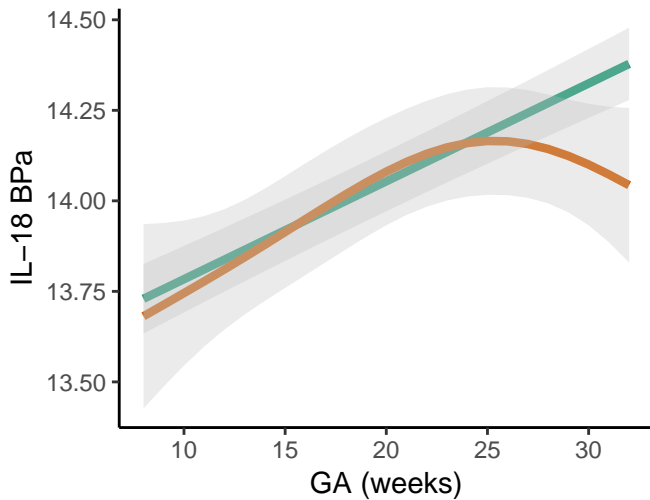

Group control mild PE severe PE

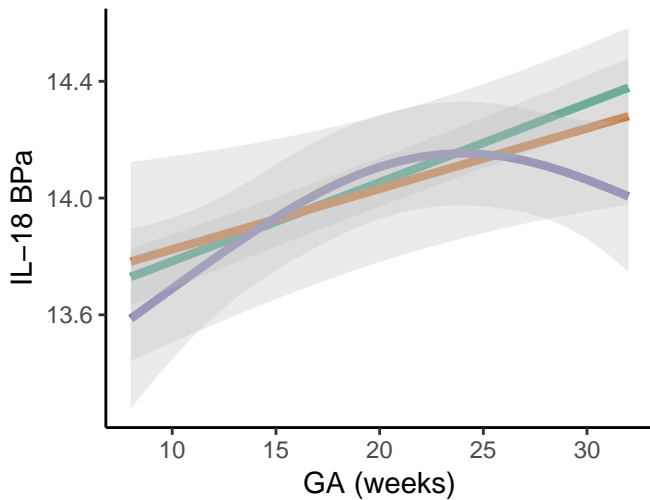

Group control MVM no MVM

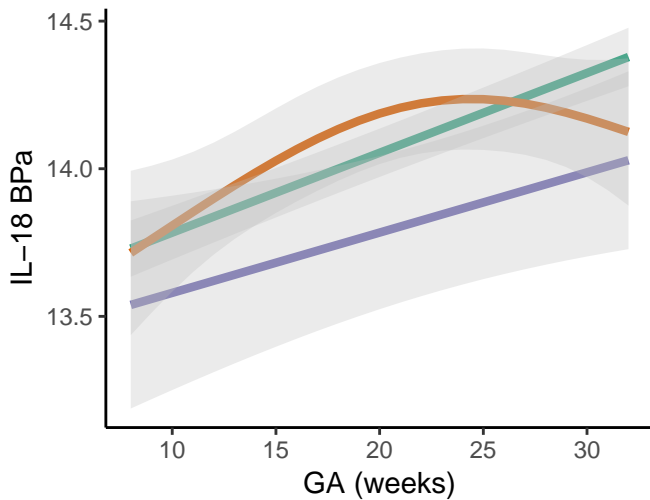



Group control PE

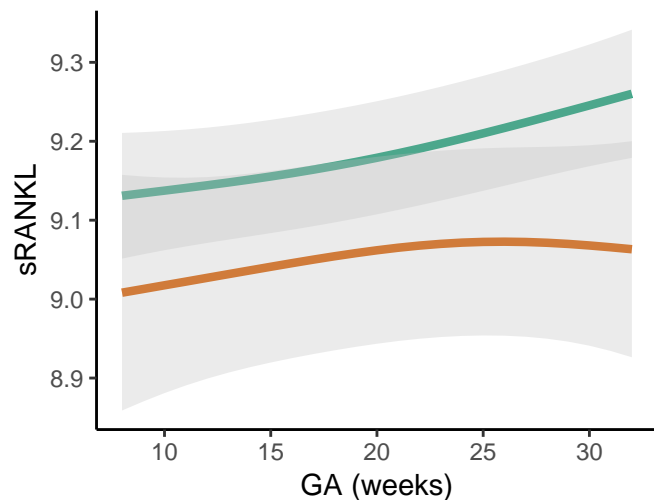

Group control mild PE severe PE

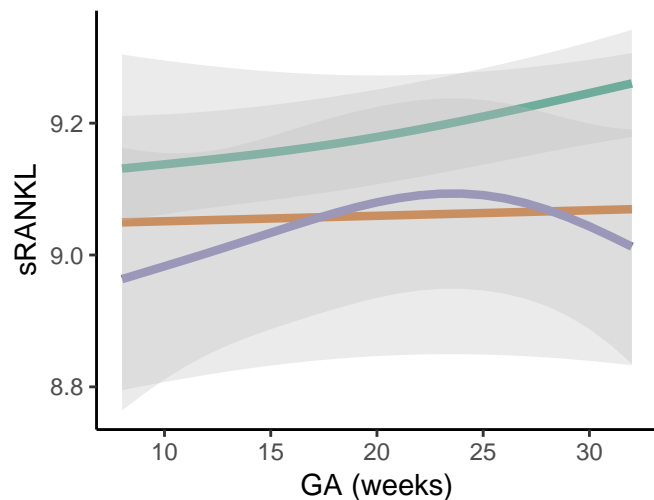

Group control MVM no MVM

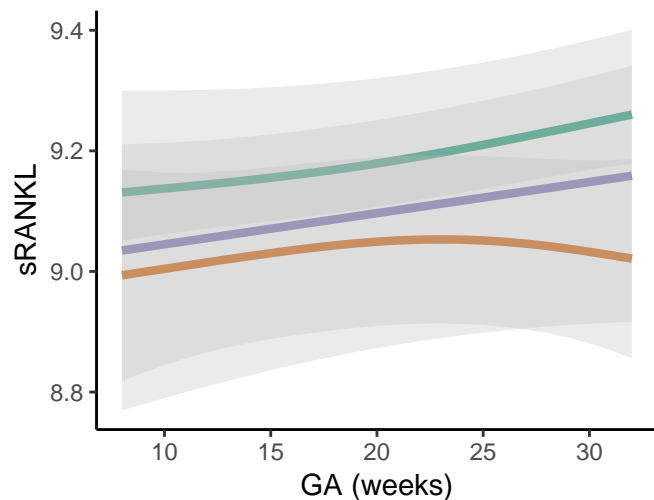

Group control PE

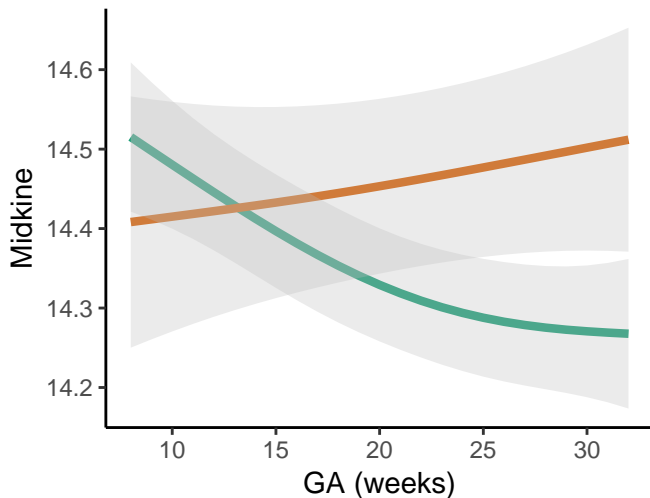

Group control mild PE severe PE

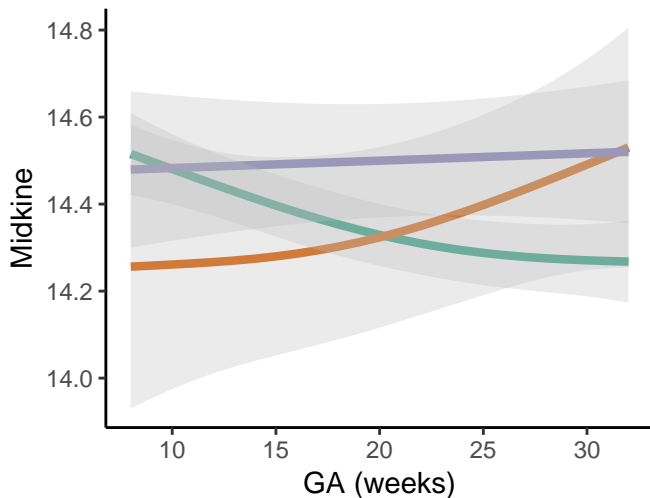

Group control MVM no MVM

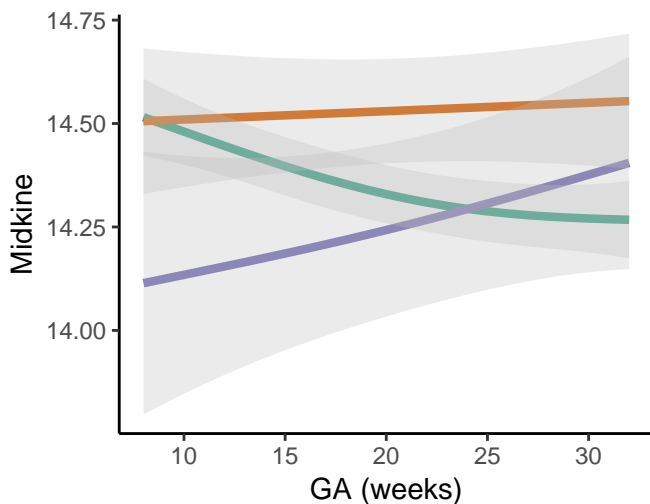

Group control PE

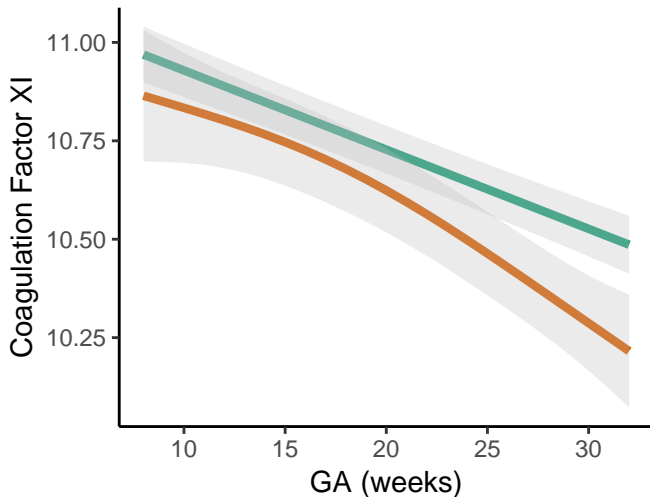

Group control mild PE severe PE

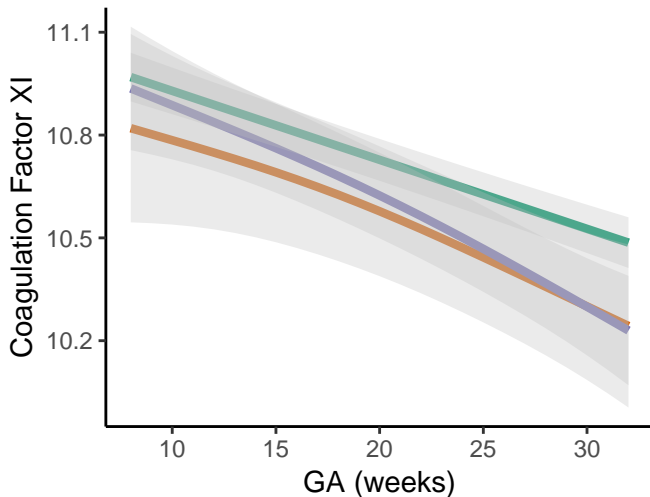

Group control MVM no MVM

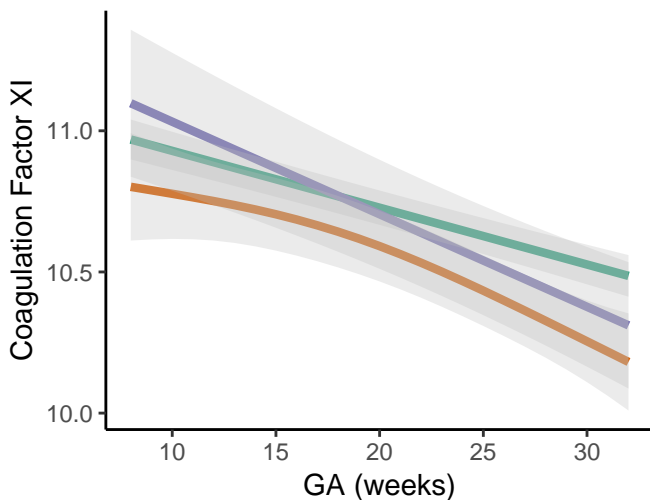

Group control PE

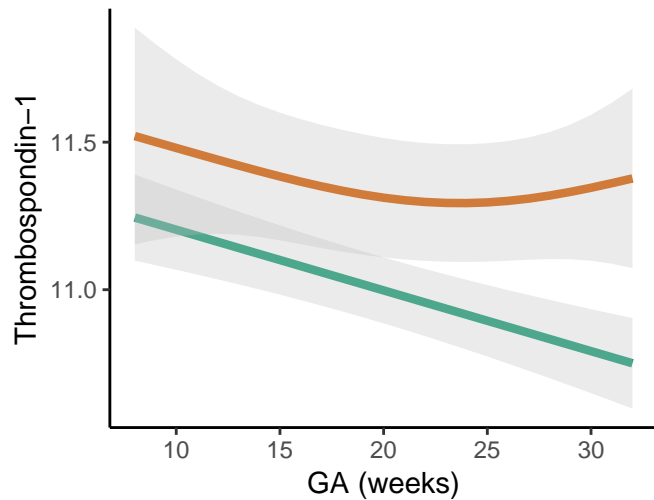

Group control mild PE severe PE

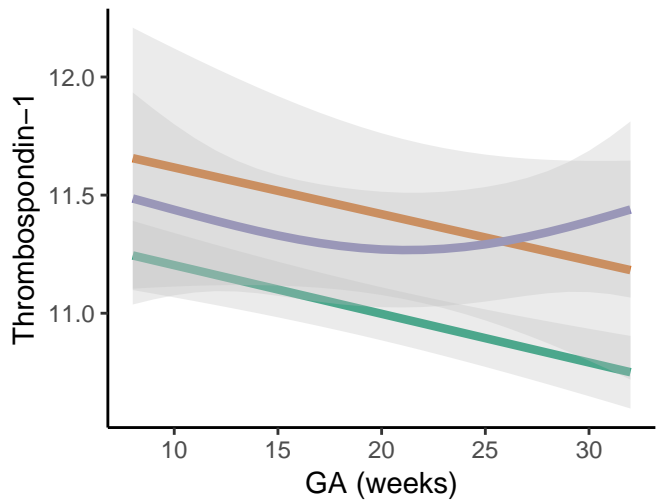

Group control MVM no MVM

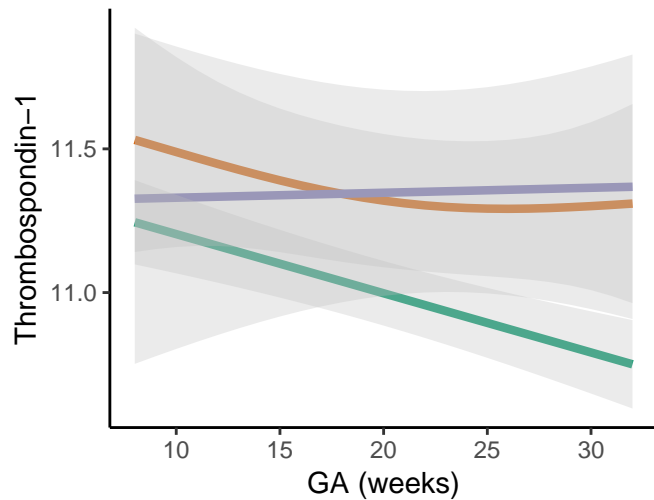

Group control PE

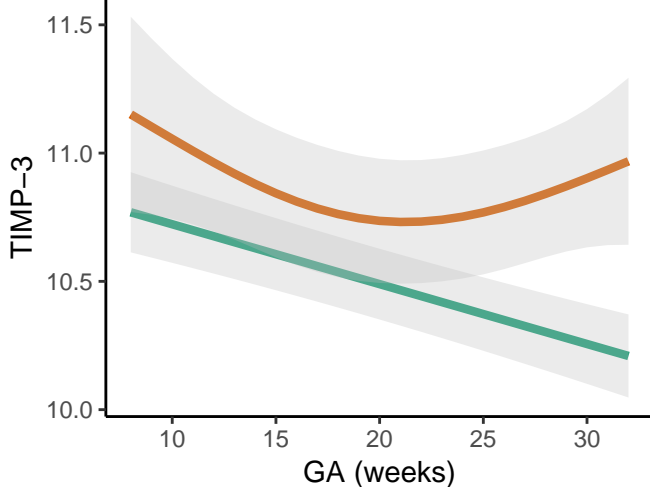

Group control mild PE severe PE

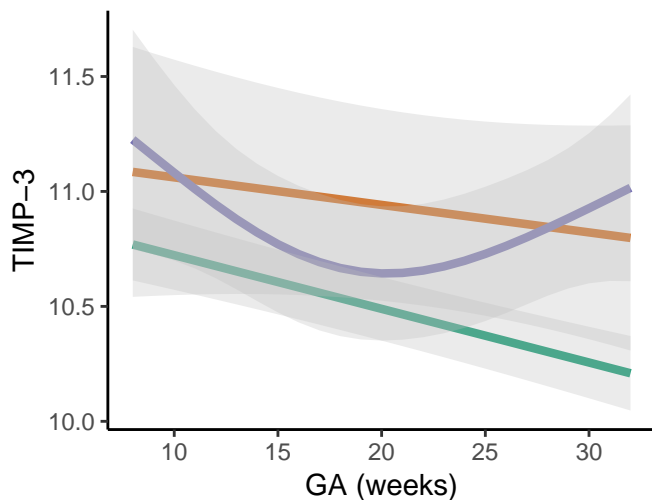

Group control MVM no MVM

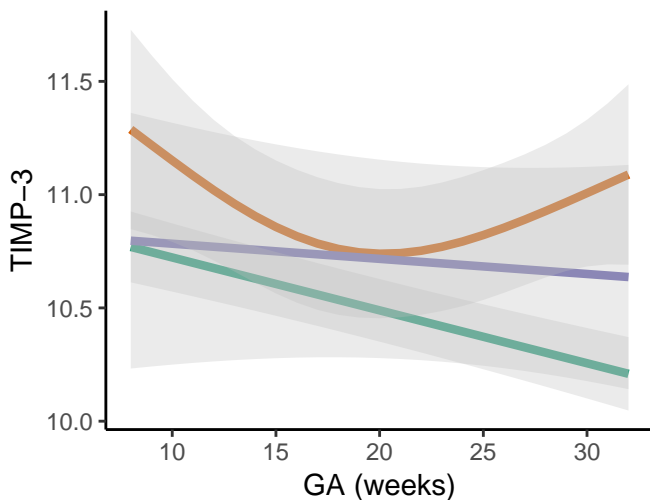

Group control PE

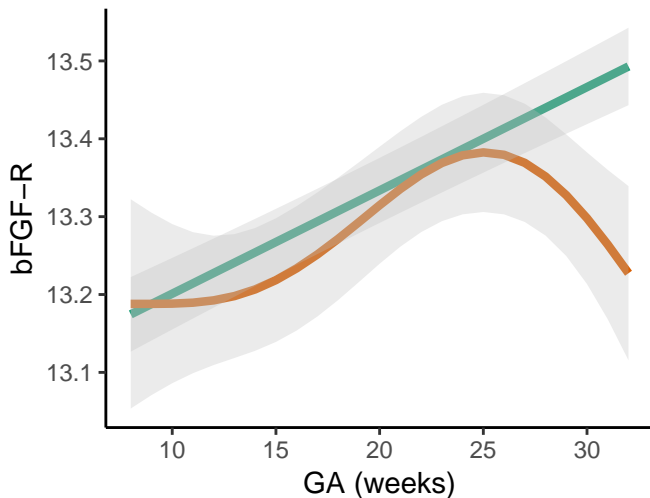

Group control mild PE severe PE

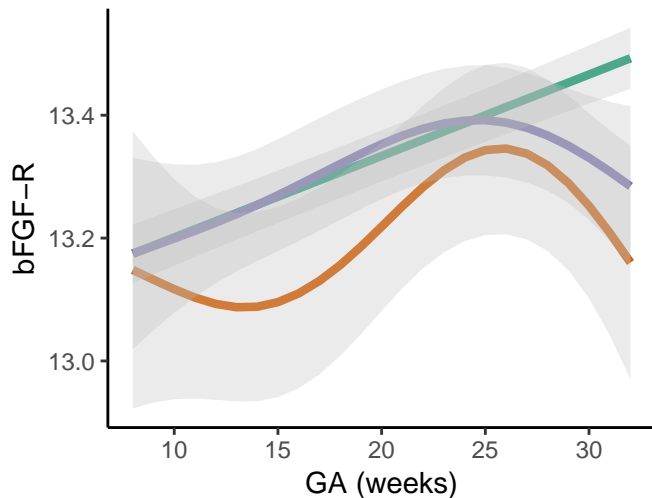

Group control MVM no MVM

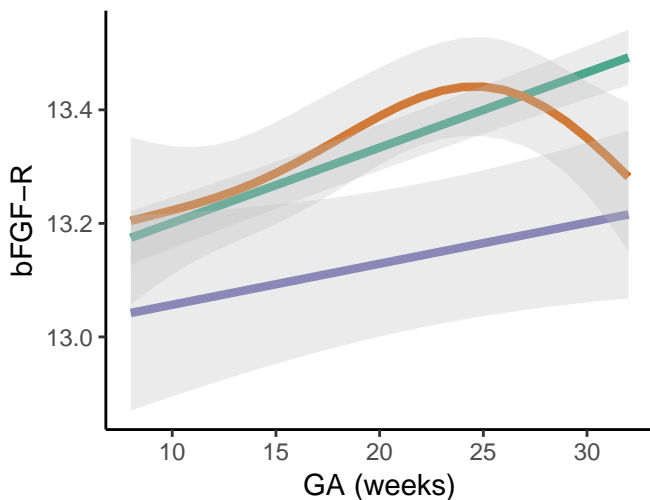

Group control PE

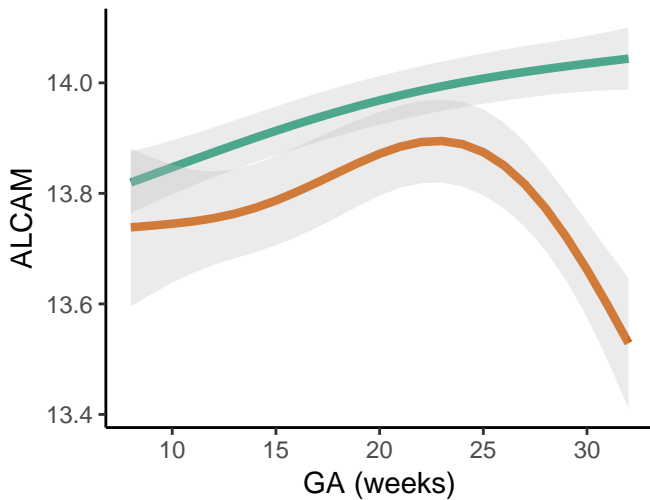

Group control mild PE severe PE

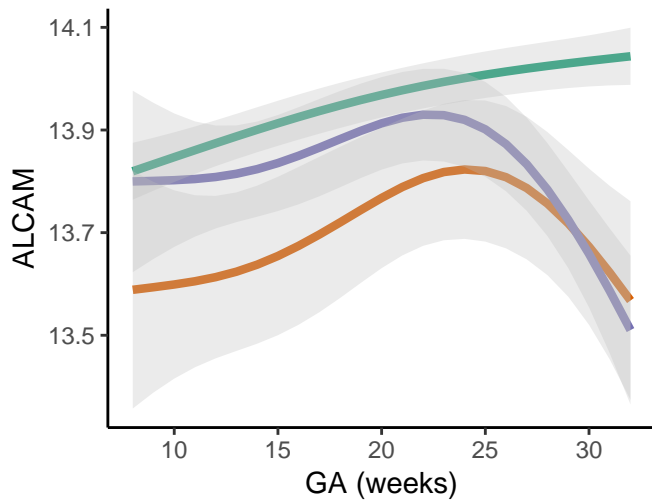

Group control MVM no MVM

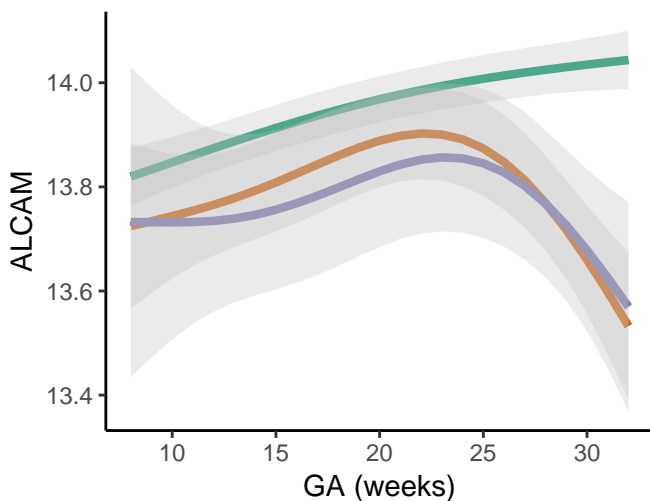

Group control PE

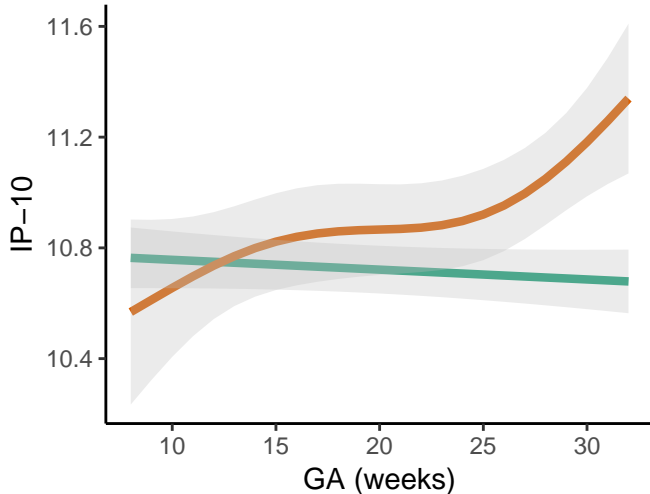

Group control mild PE severe PE

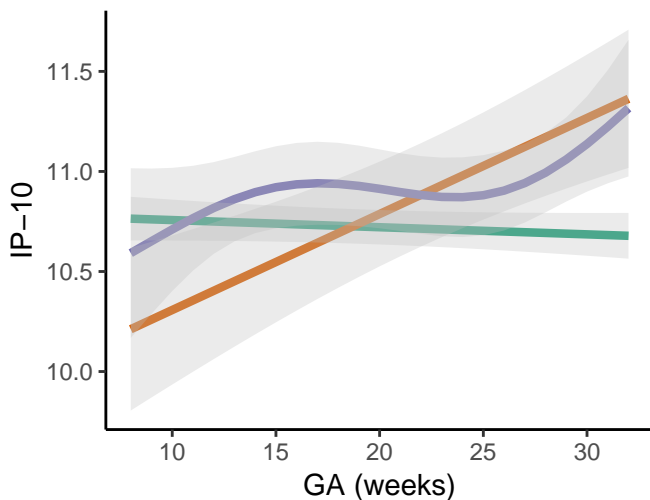

Group control MVM no MVM

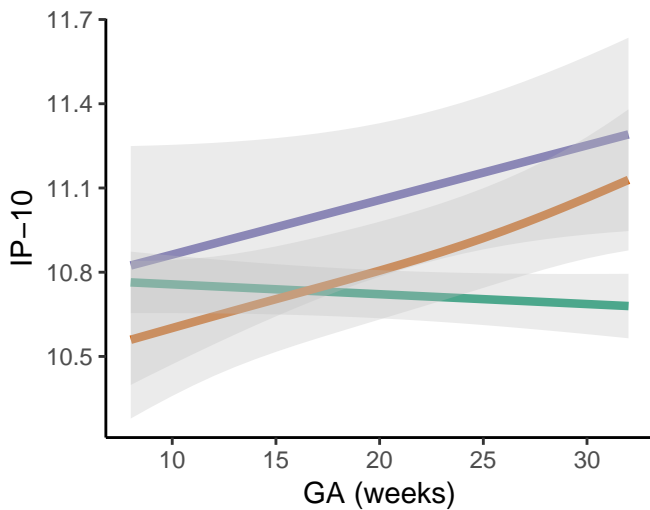



Group control PE

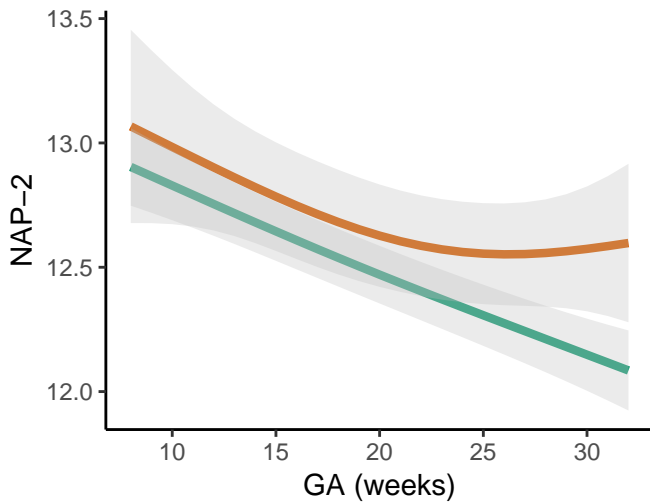

Group control mild PE severe PE

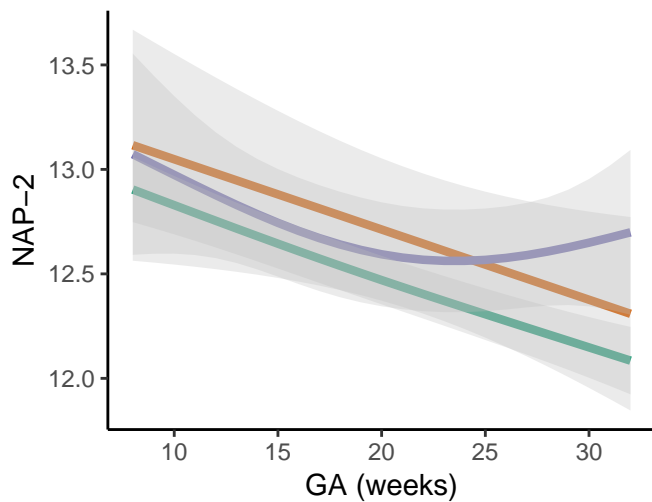

Group control MVM no MVM

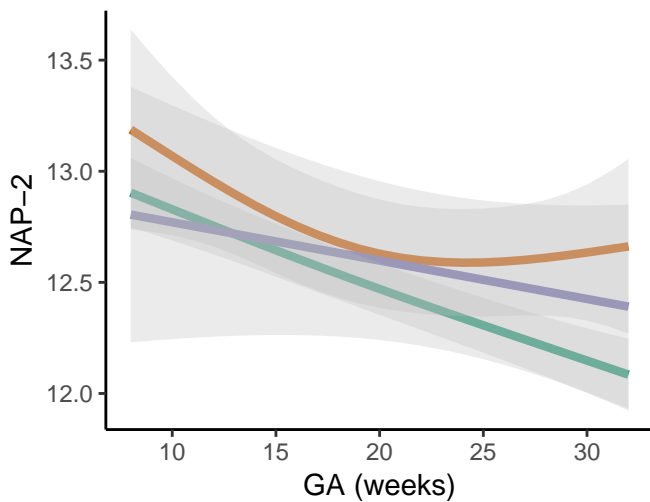

Group control PE

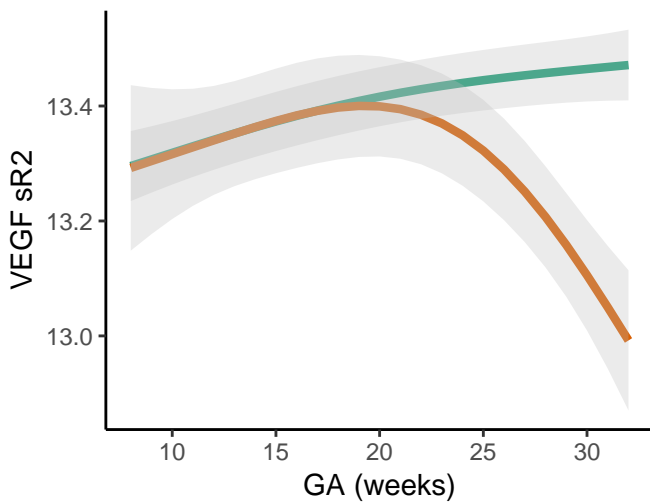

Group control mild PE severe PE

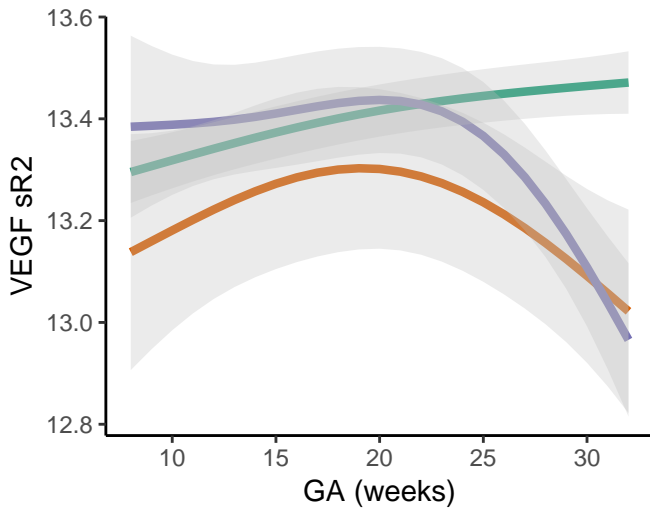

Group control MVM no MVM

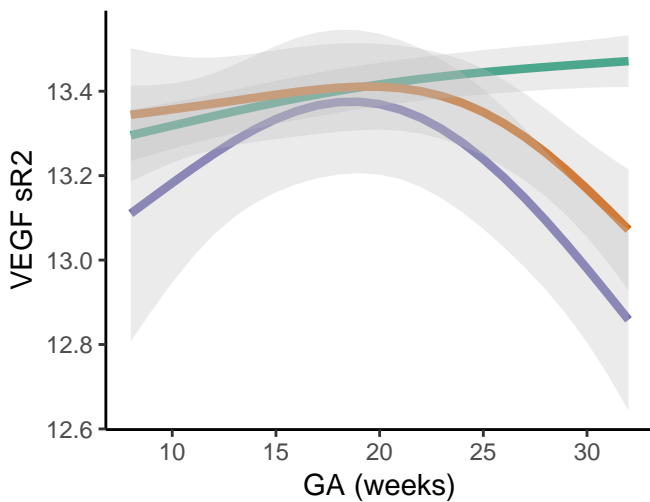

Group control PE

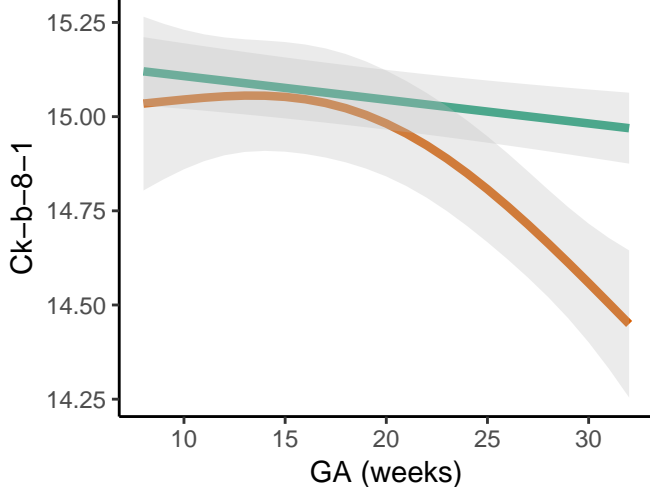

Group control mild PE severe PE

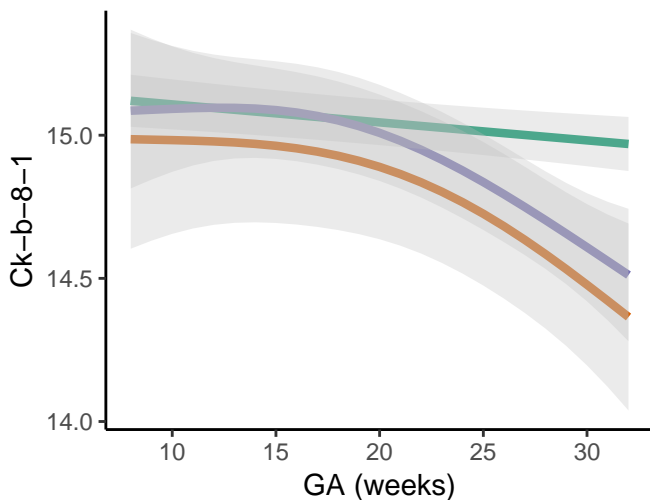

Group control MVM no MVM

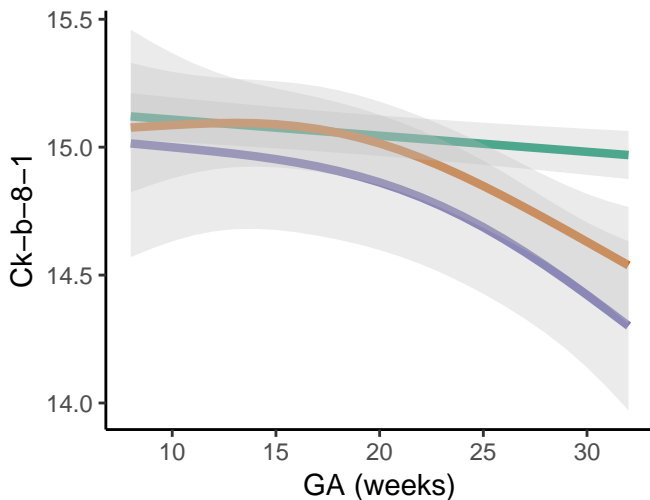

Group control PE

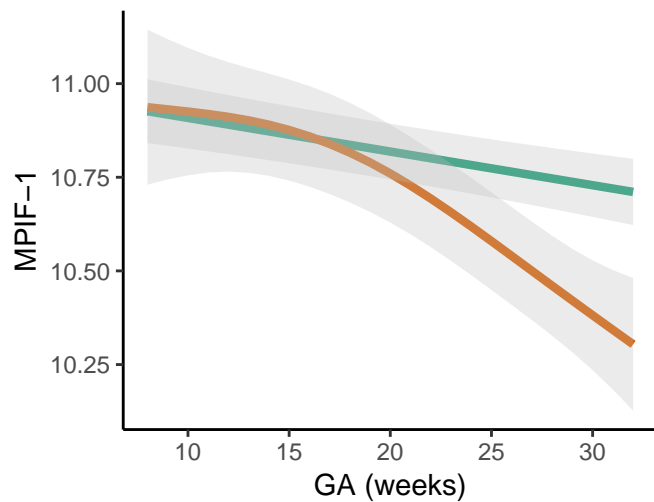

Group control mild PE severe PE

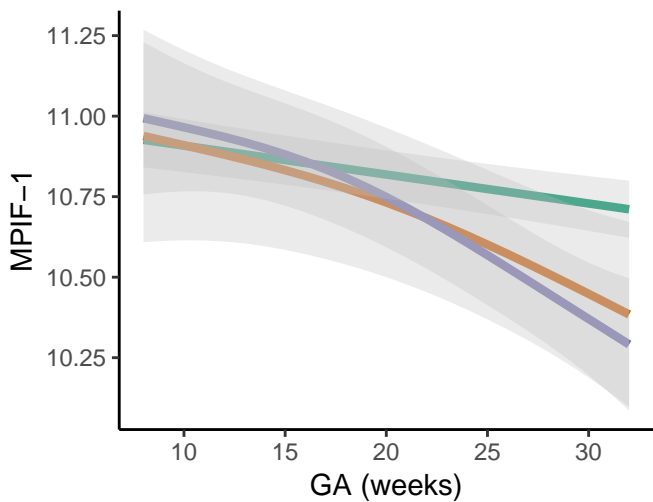

Group control MVM no MVM

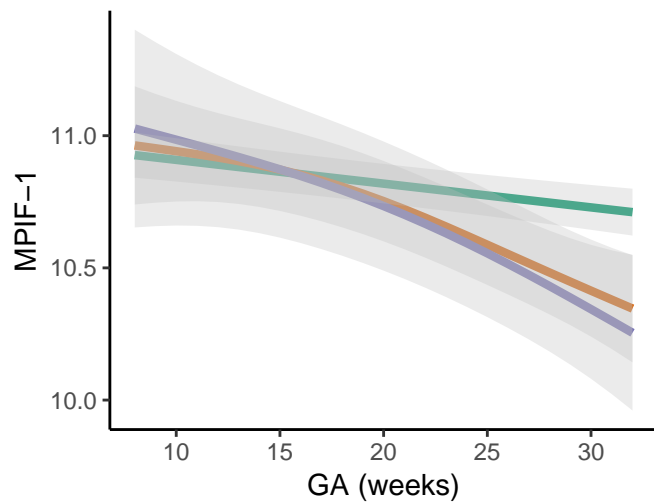

Group control PE

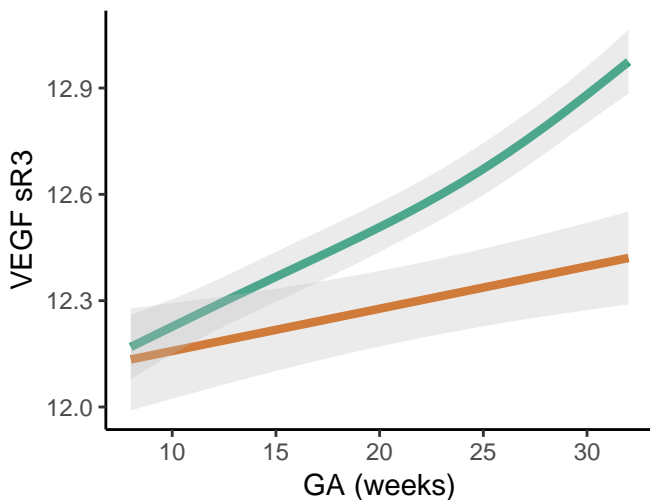

Group control mild PE severe PE

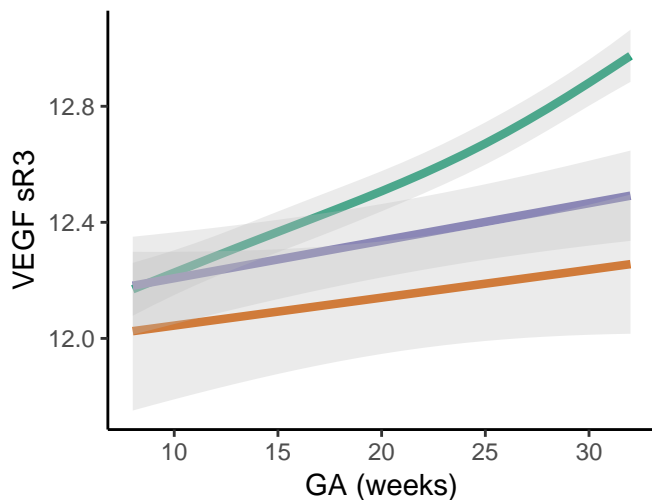

Group control MVM no MVM

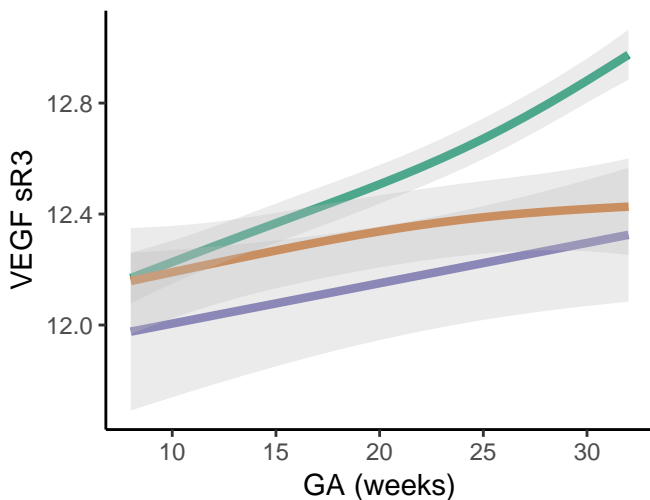

Group control PE

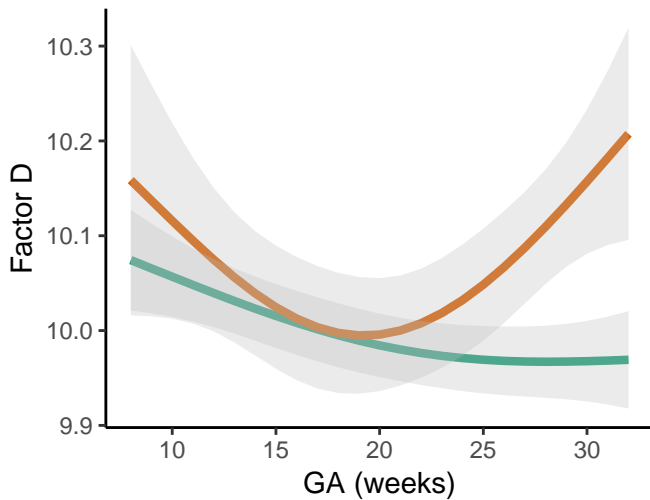

Group control mild PE severe PE

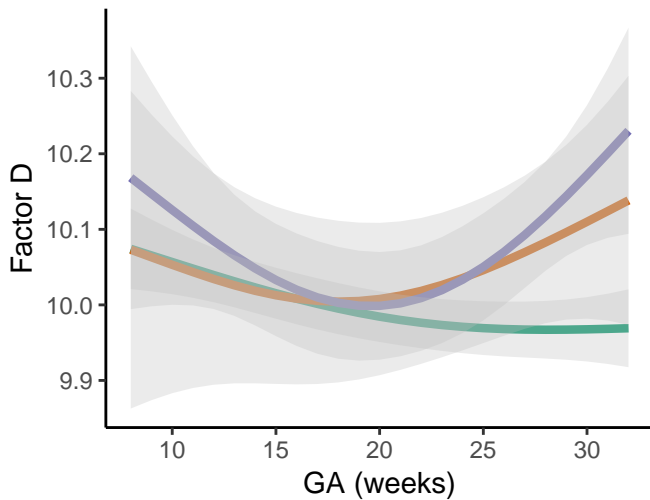

Group control MVM no MVM

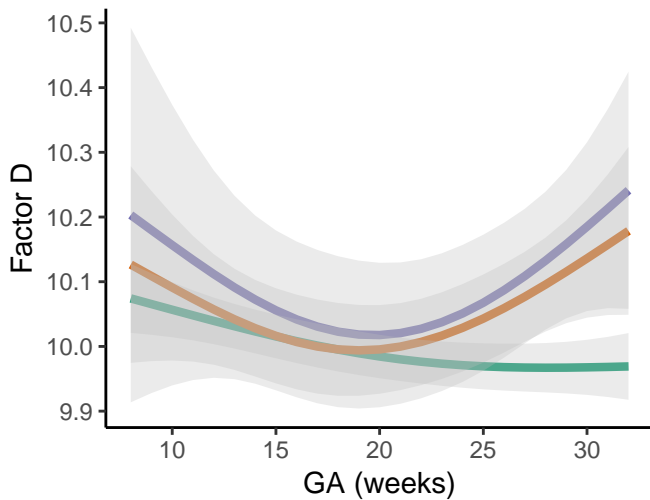

Group control PE

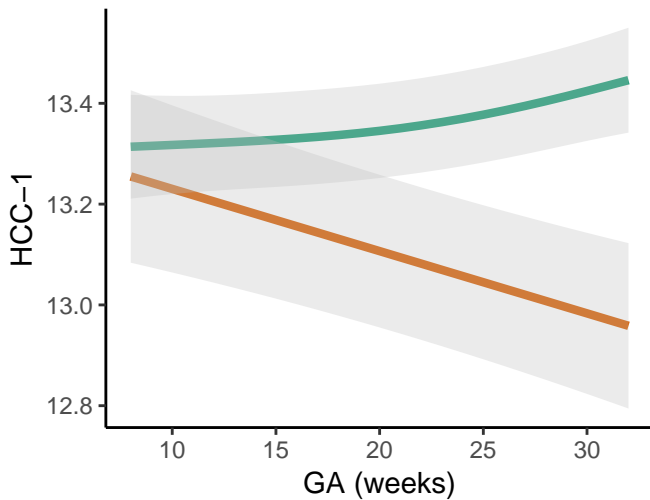

Group control mild PE severe PE

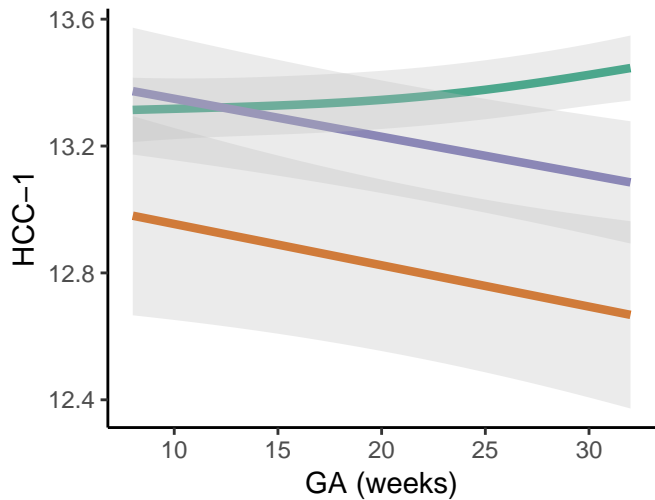

Group control MVM no MVM

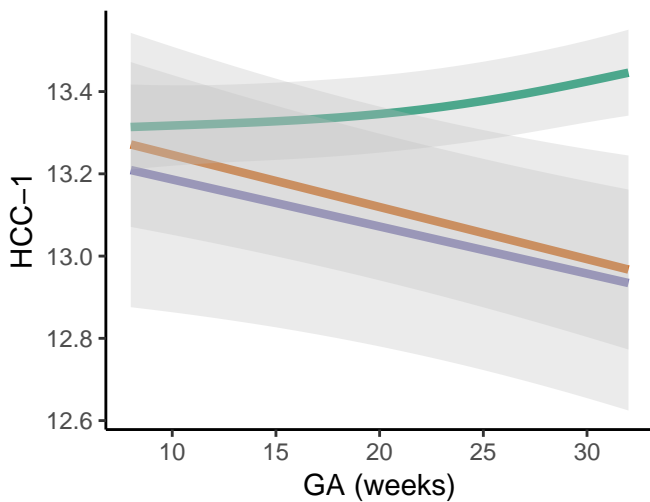

Group control PE

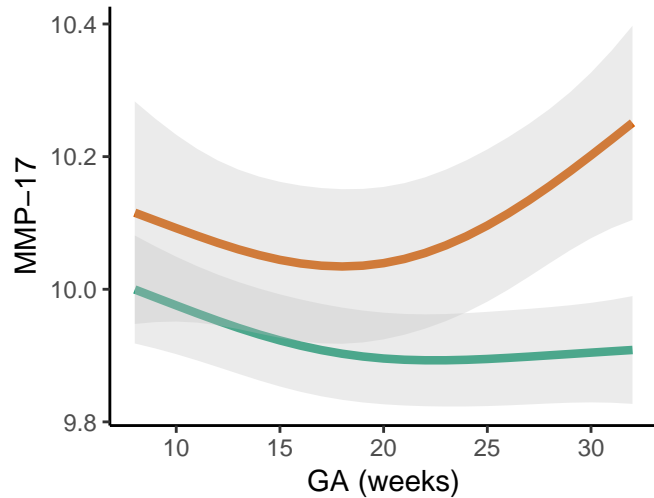

Group control mild PE severe PE

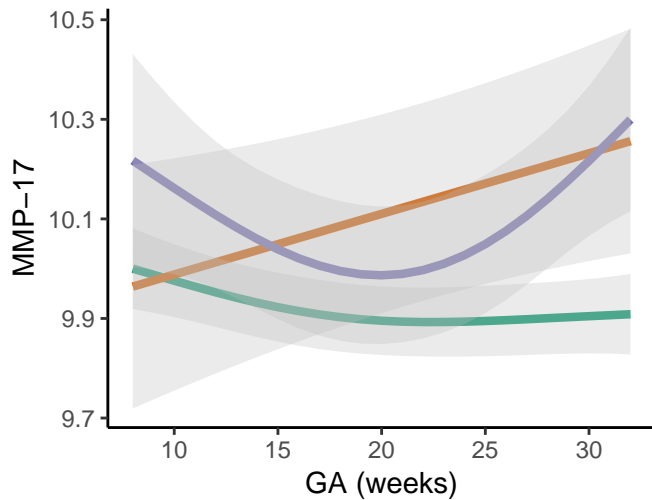

Group control MVM no MVM

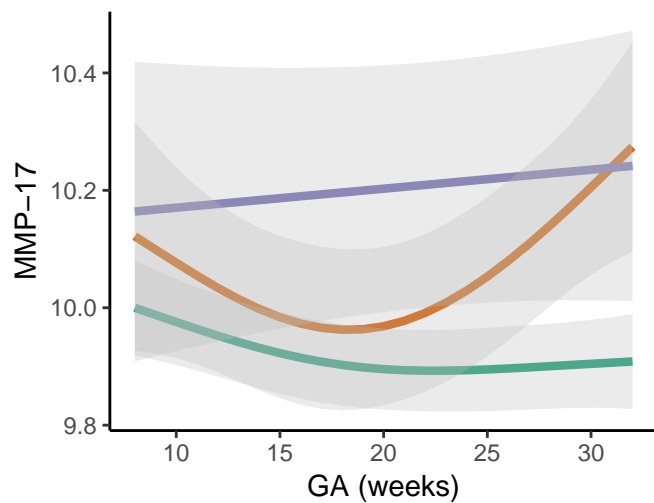



Group control PE

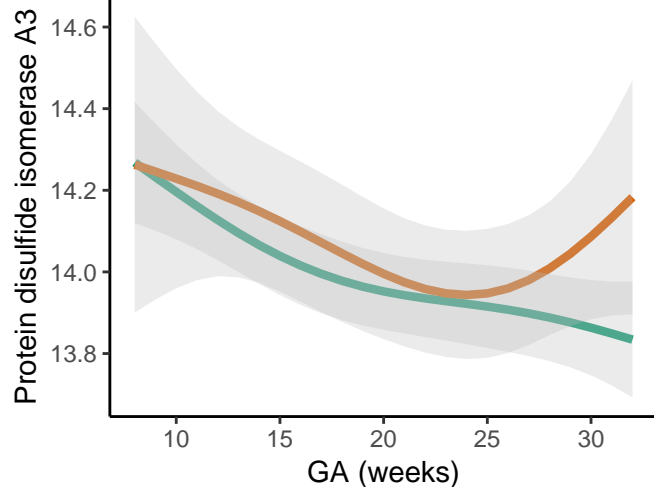

Group control mild PE severe PE

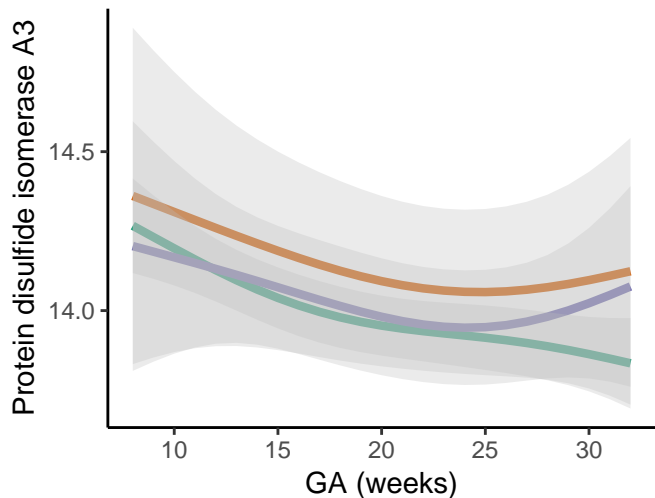

Group control MVM no MVM

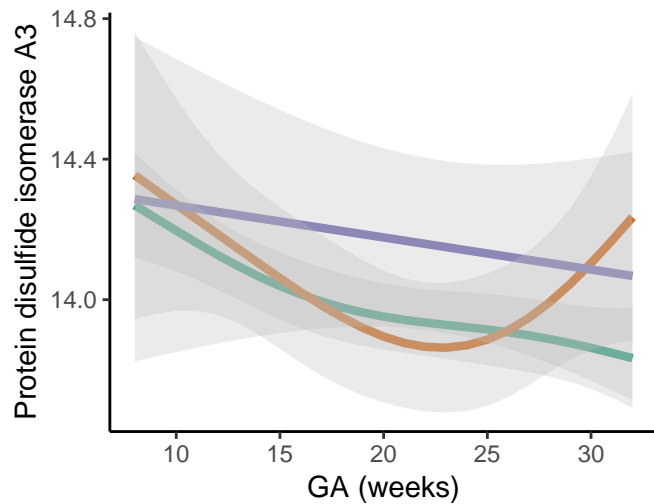

Group control PE

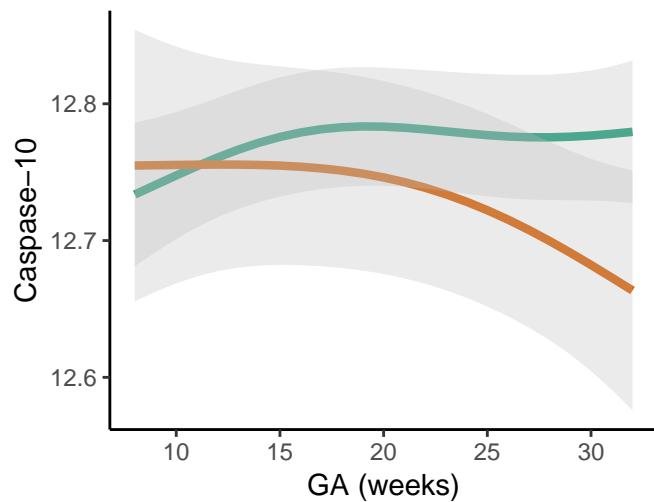

Group control mild PE severe PE

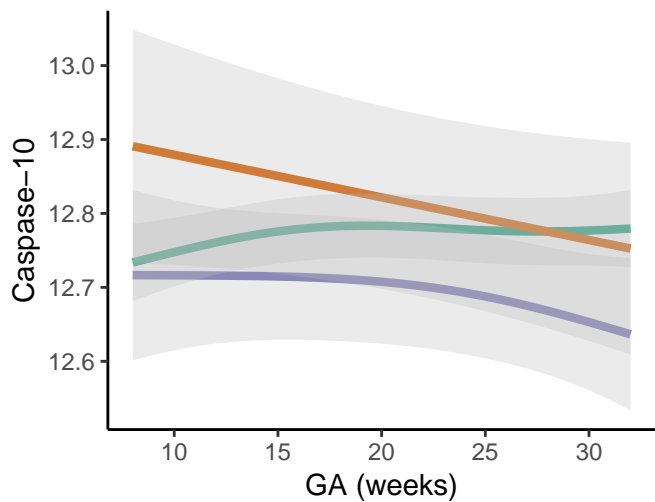

Group control MVM no MVM

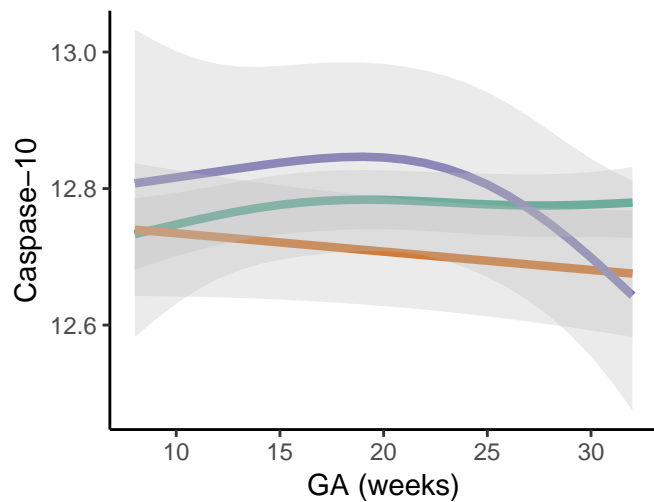

Group control PE

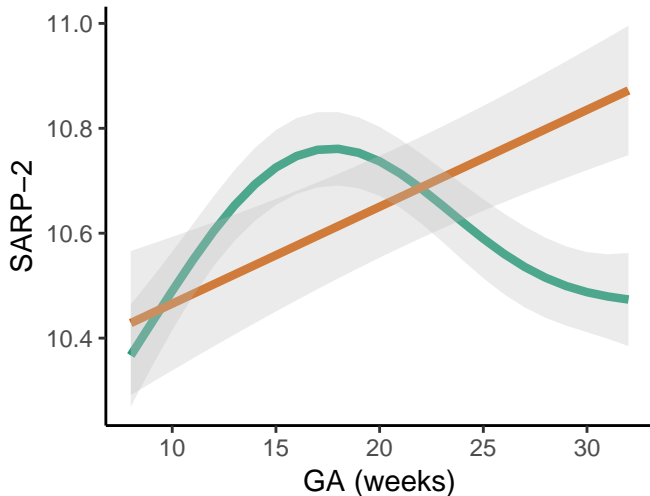

Group control mild PE severe PE

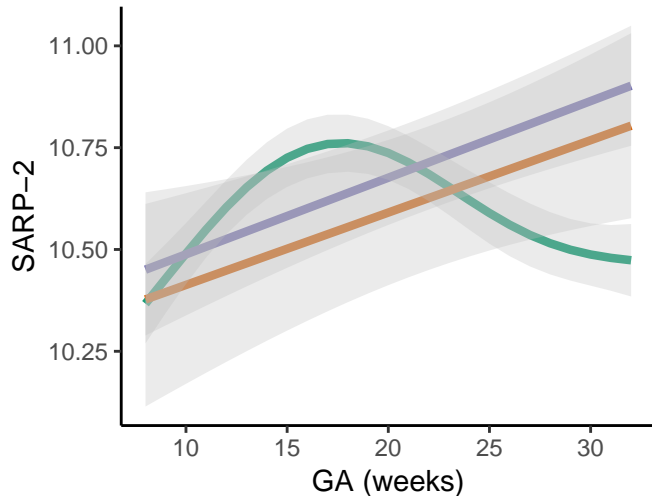

Group control MVM no MVM

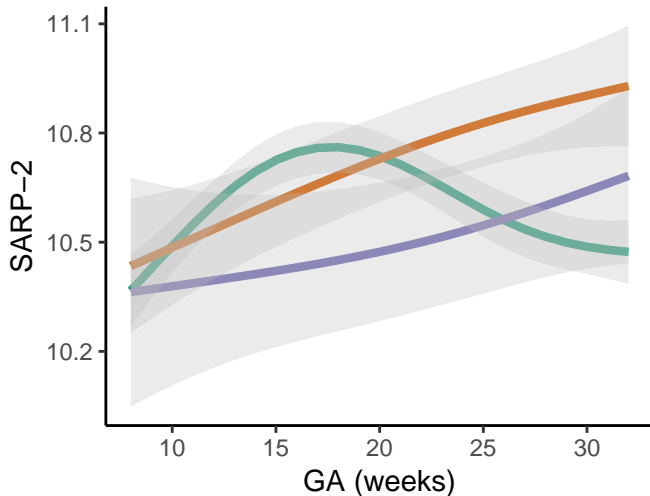

Group control PE

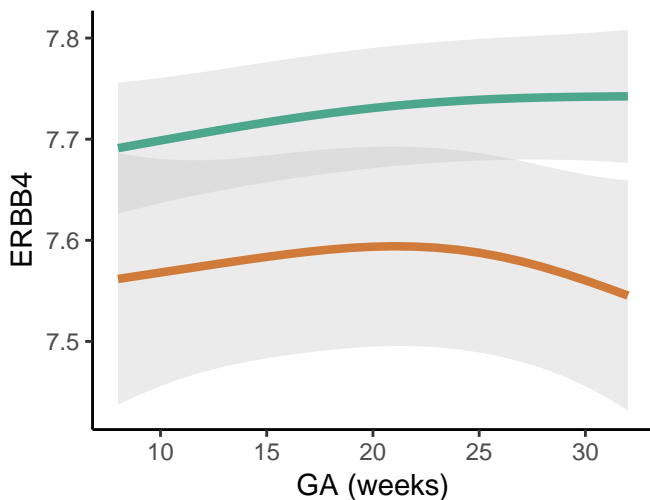

Group control mild PE severe PE

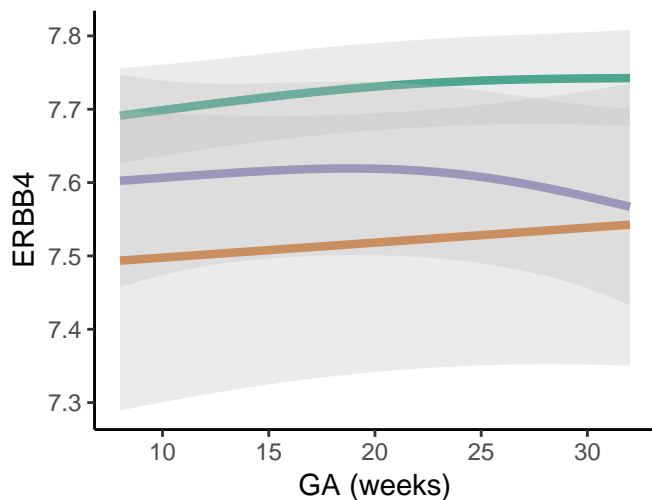

Group control MVM no MVM

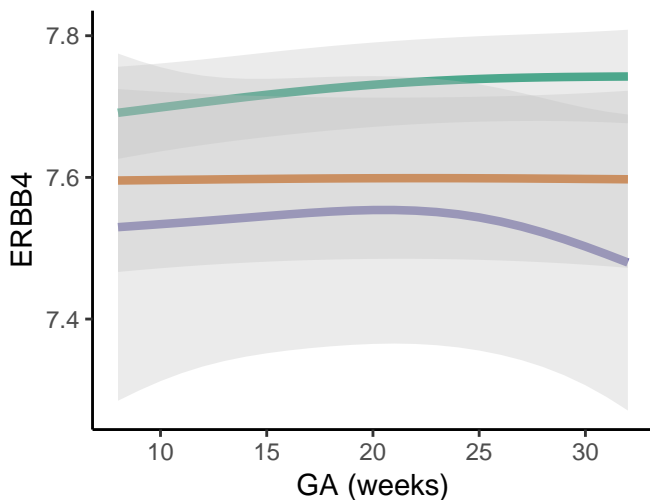

Group control PE

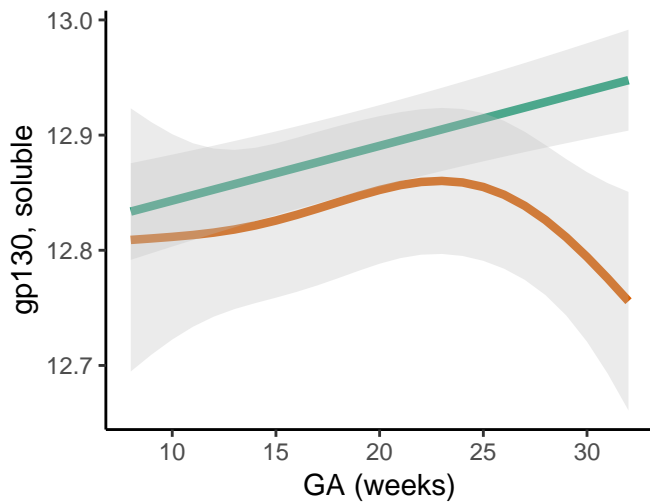

Group control mild PE severe PE

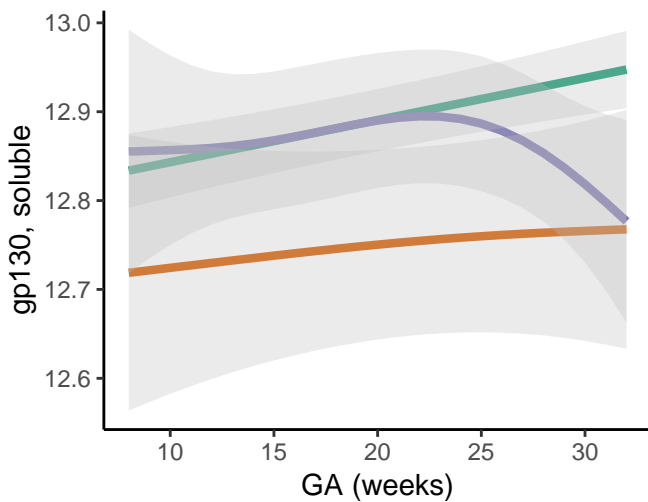

Group control MVM no MVM

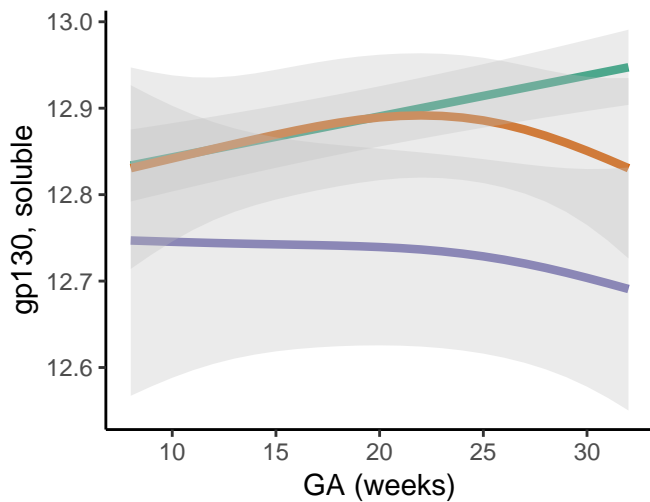

Group control PE

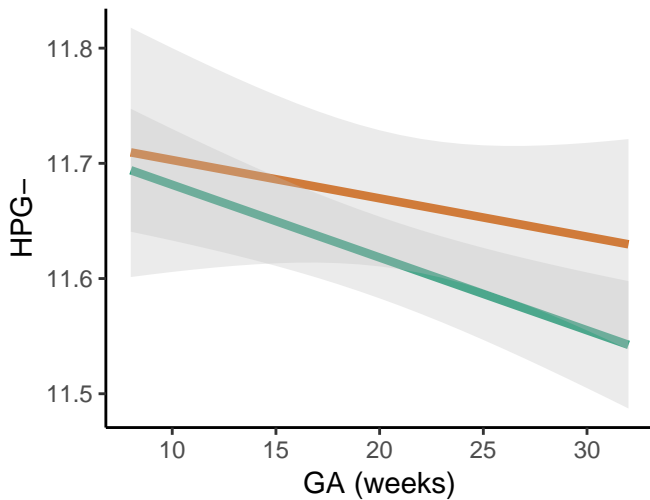

Group control mild PE severe PE

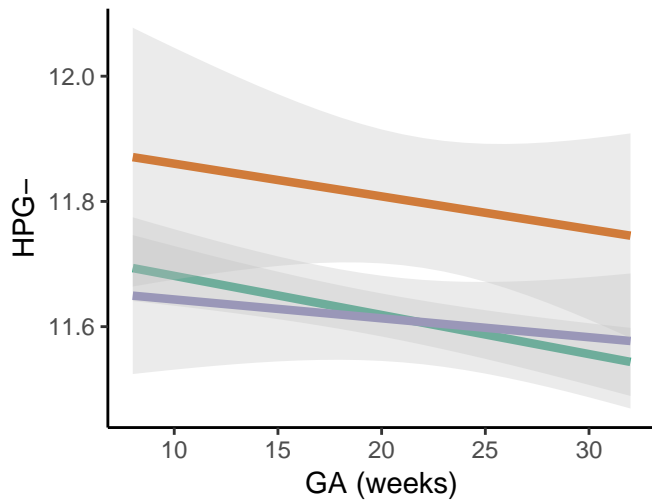

Group control MVM no MVM

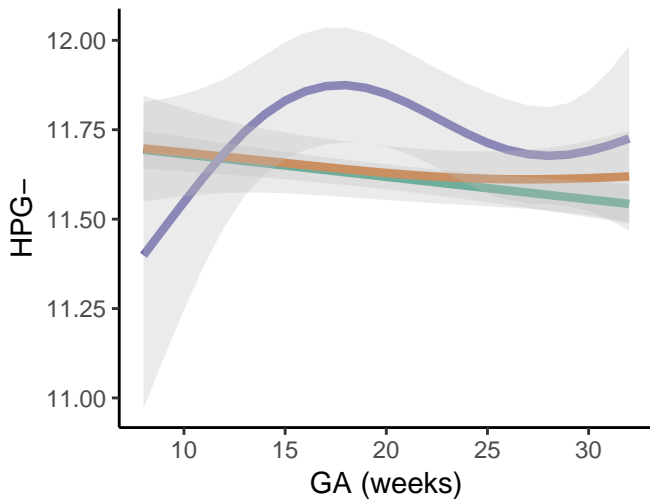

Group control PE

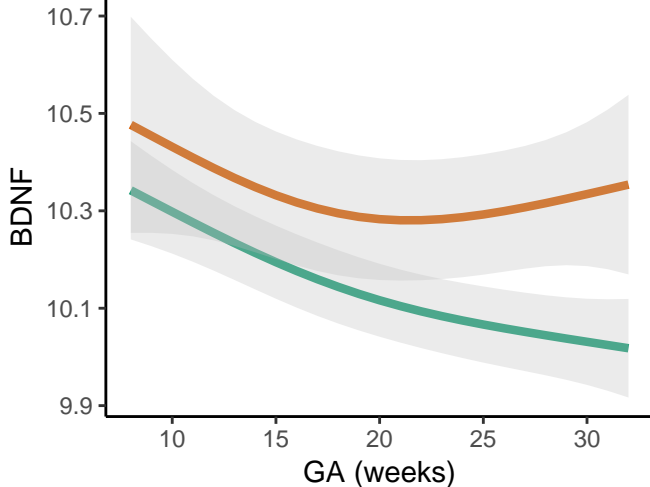

Group control mild PE severe PE

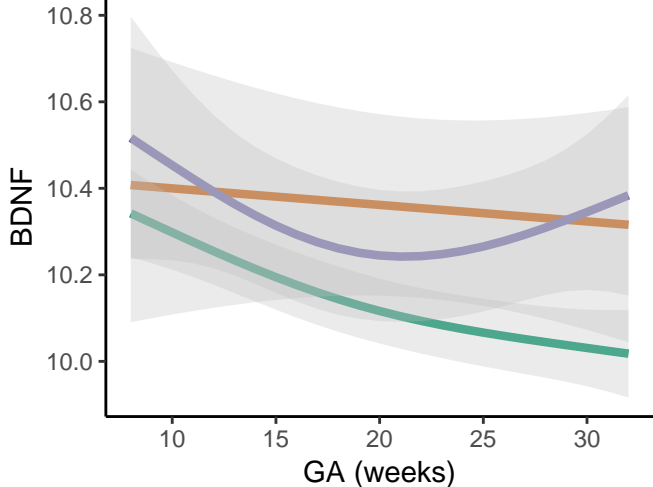

Group control MVM no MVM

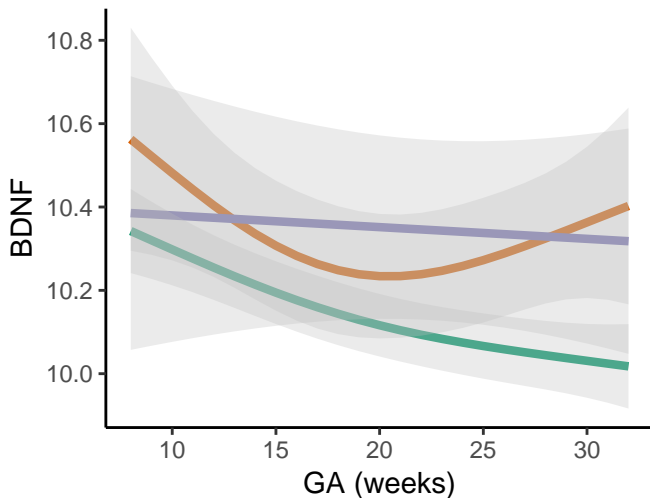

Group control PE

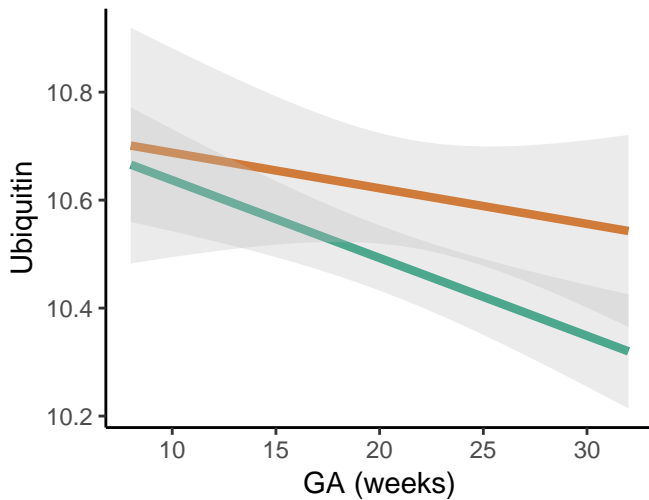

Group control mild PE severe PE

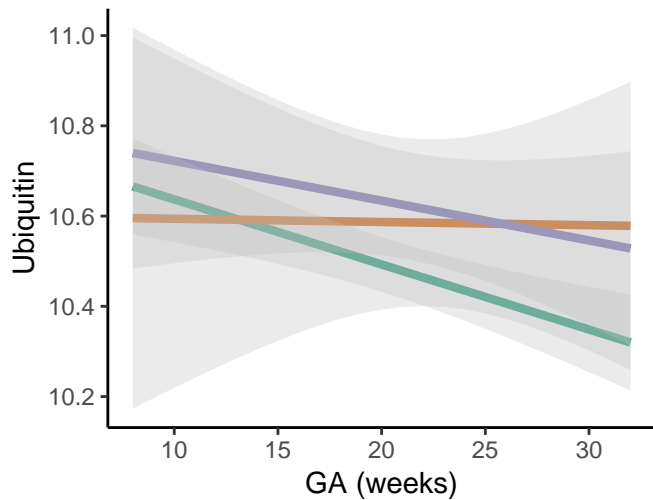

Group control MVM no MVM

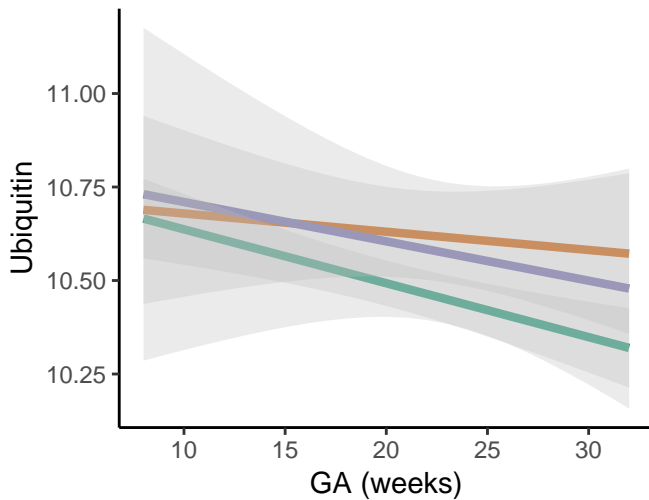



Group control PE

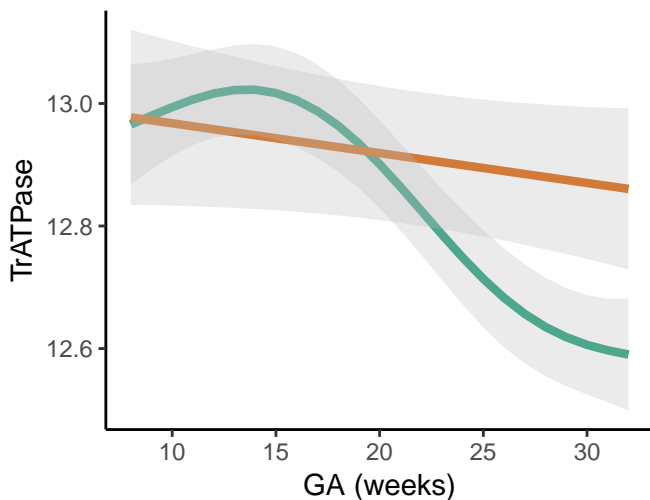

Group control mild PE severe PE

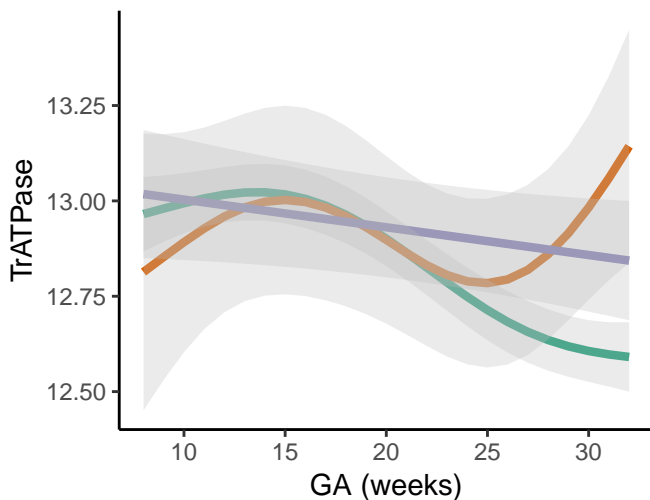

Group control MVM no MVM

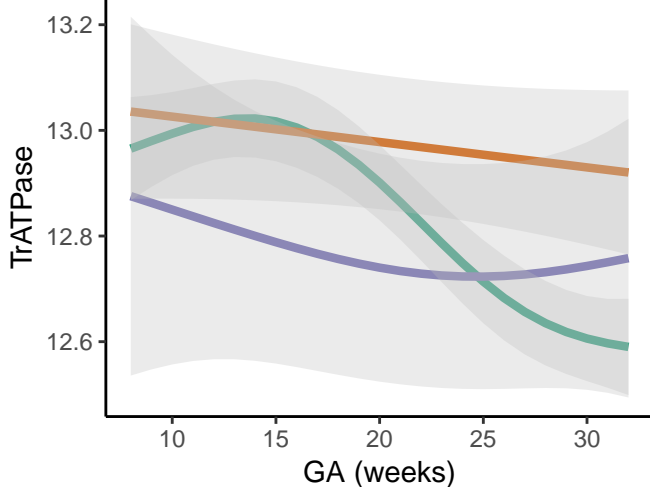

Group control PE

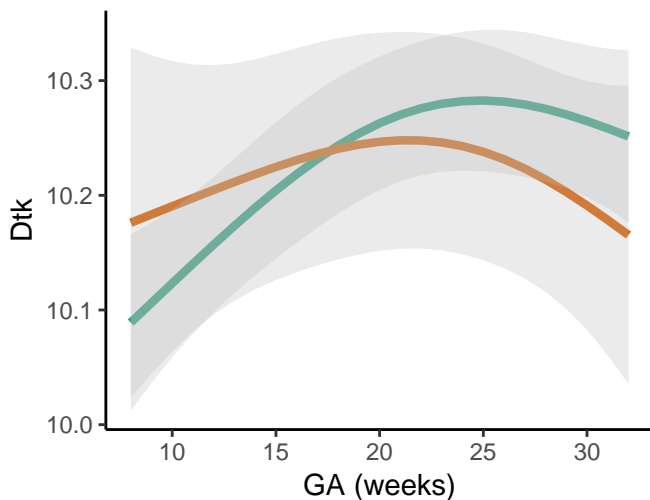

Group control mild PE severe PE

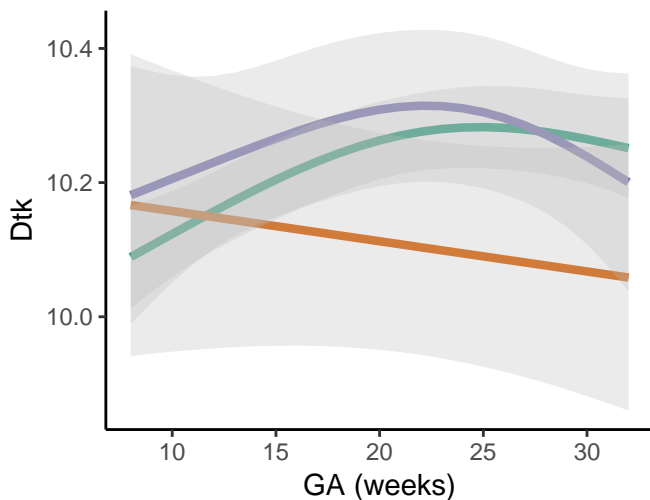

Group control MVM no MVM

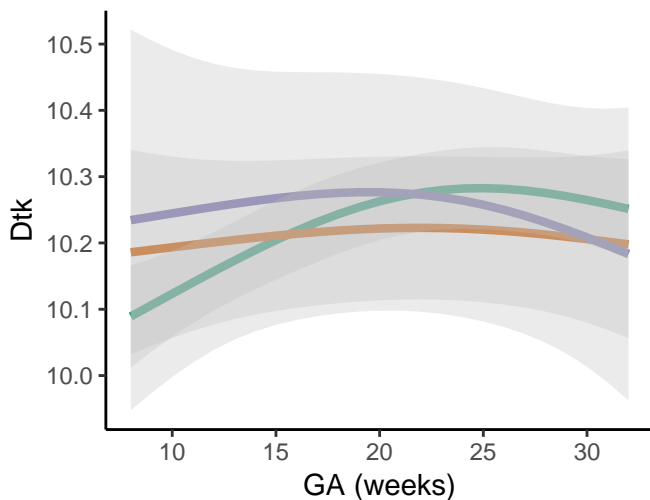

Group control PE

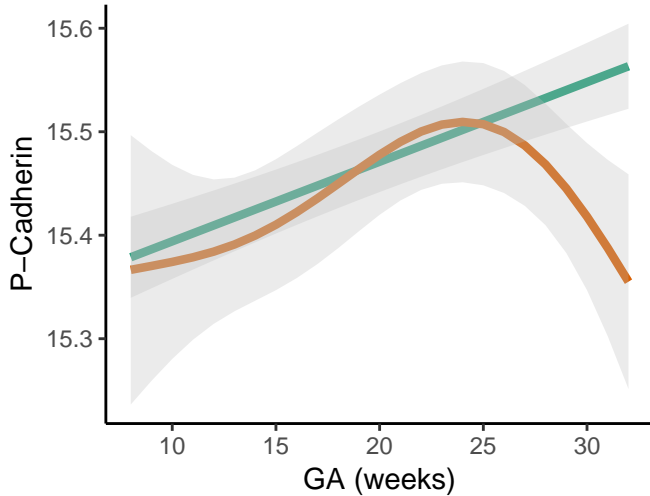

Group control mild PE severe PE

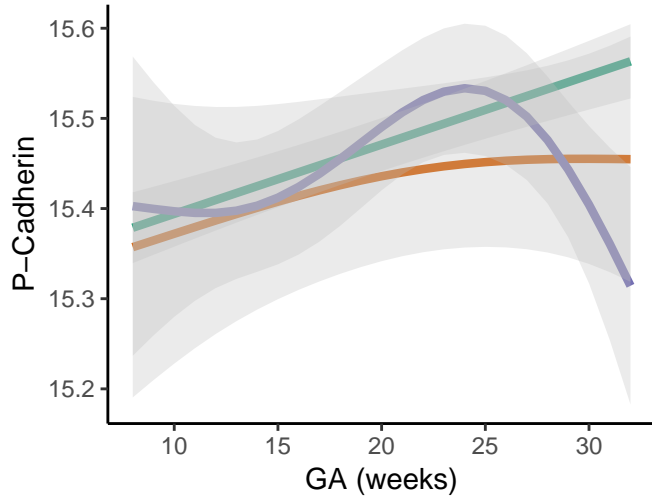

Group control MVM no MVM

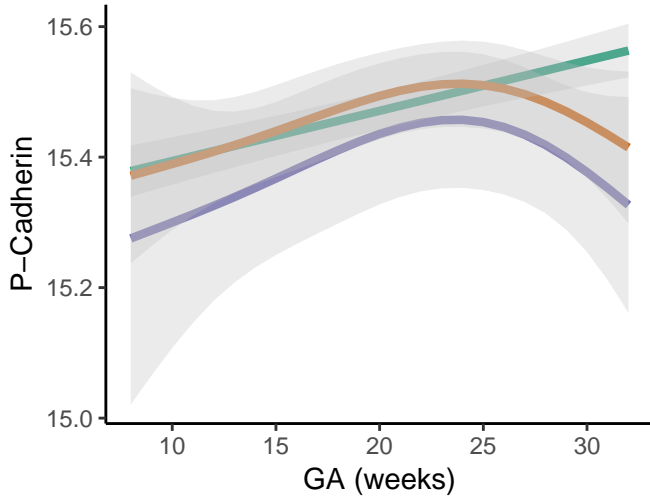

Group control PE

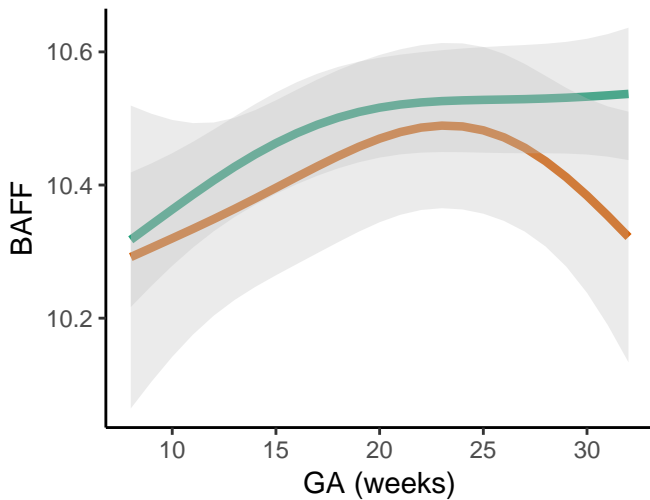

Group control mild PE severe PE

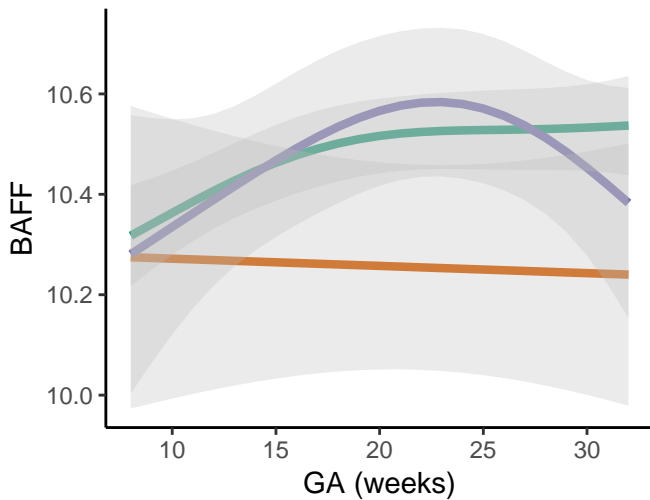

Group control MVM no MVM

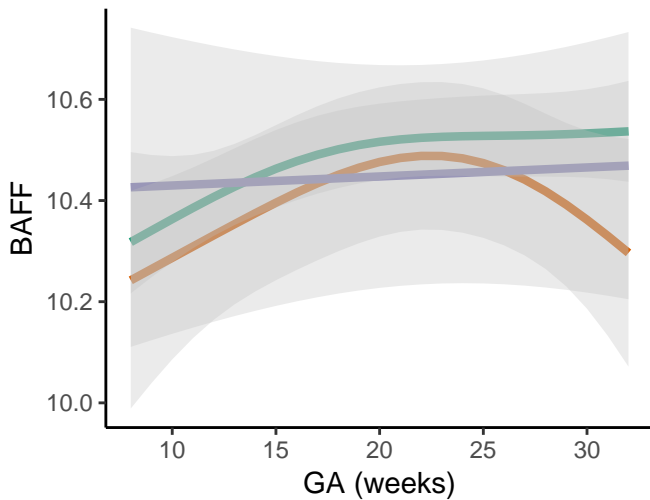

Group control PE

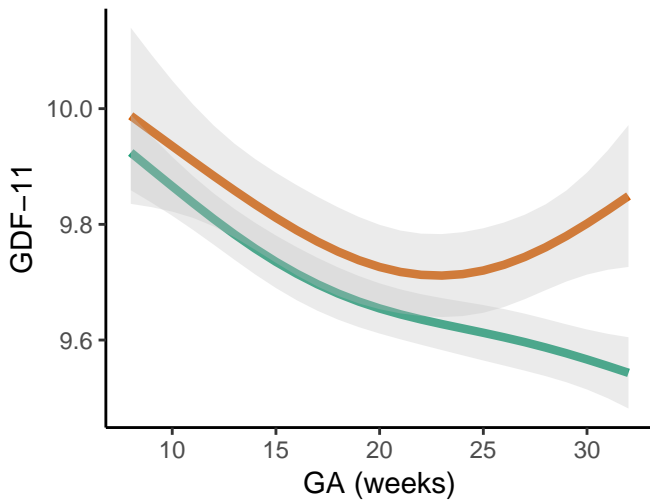

Group control mild PE severe PE

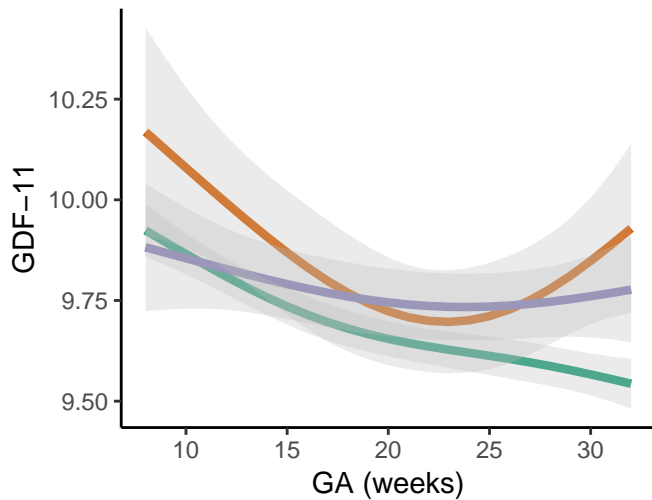

Group control MVM no MVM

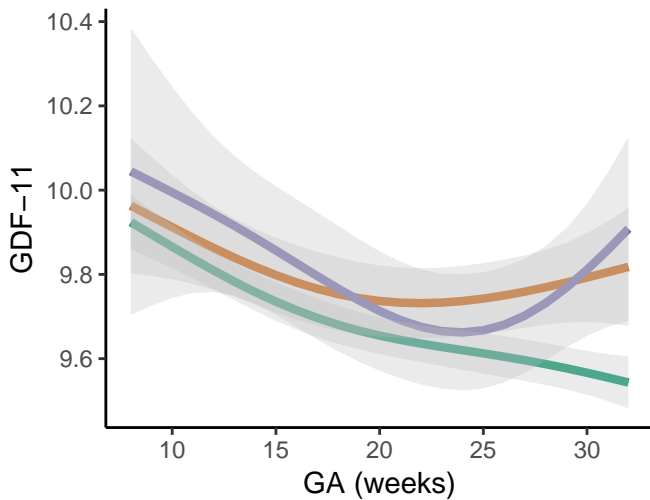

Group control PE

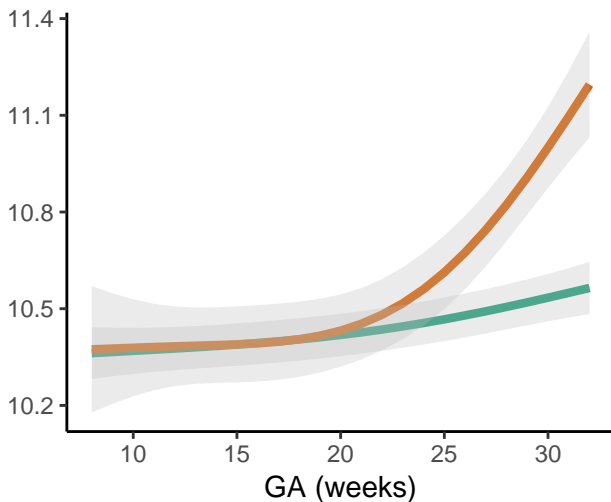

Group control mild PE severe PE

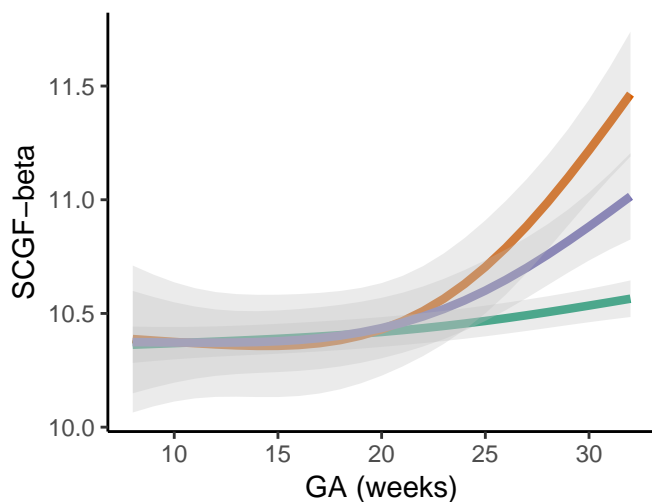

Group control MVM no MVM

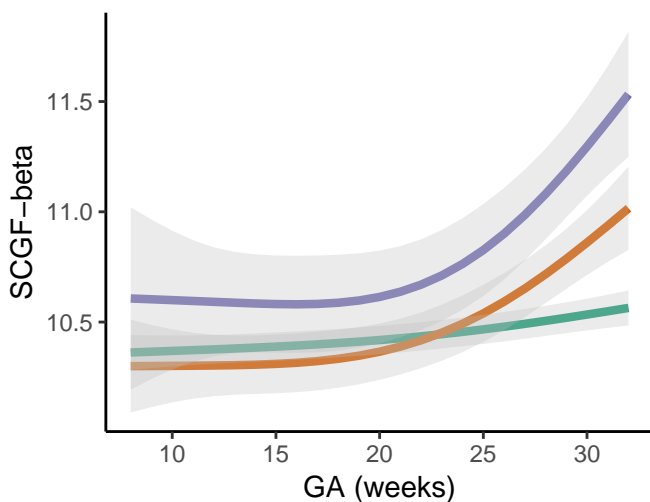

Group control PE

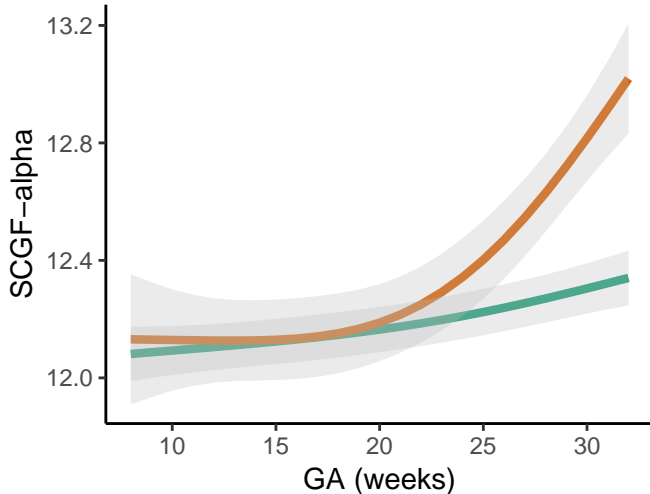

Group control mild PE severe PE

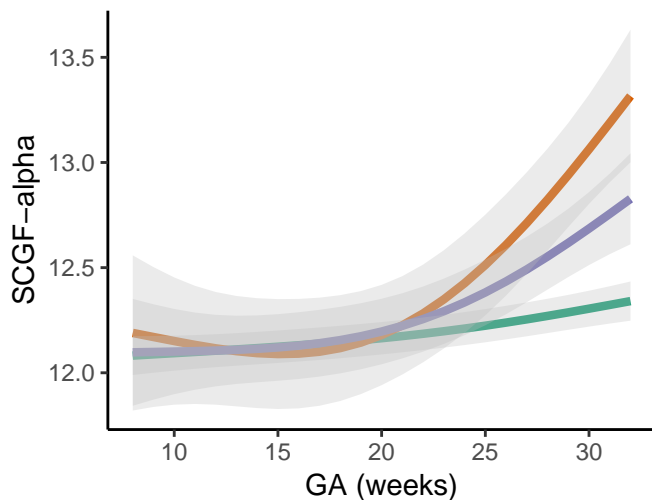

Group control MVM no MVM

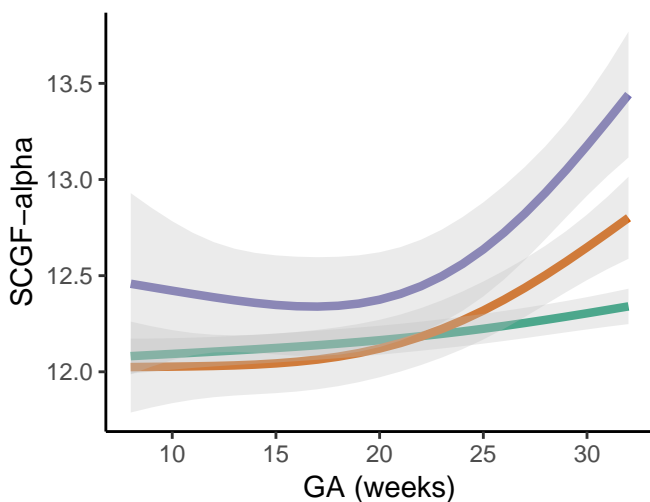

Group control PE

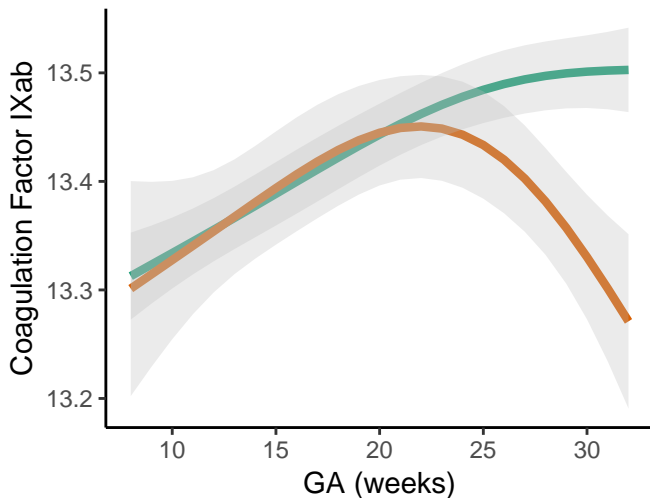

Group control mild PE severe PE

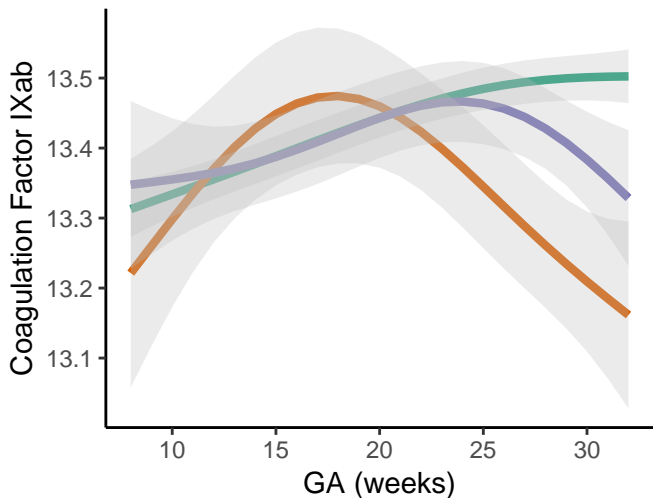

Group control MVM no MVM

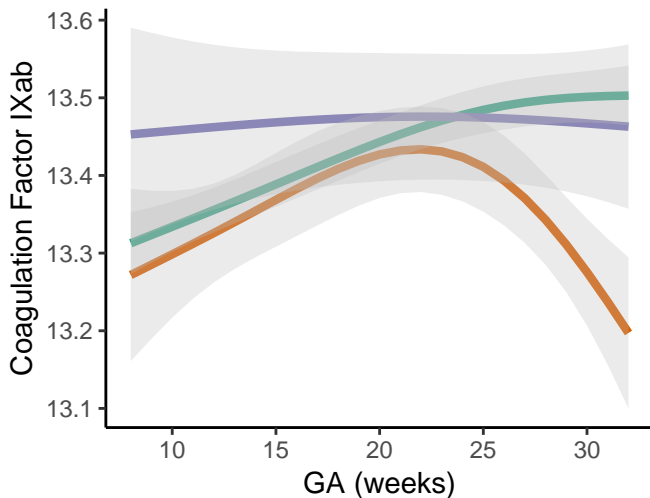



Group control PE

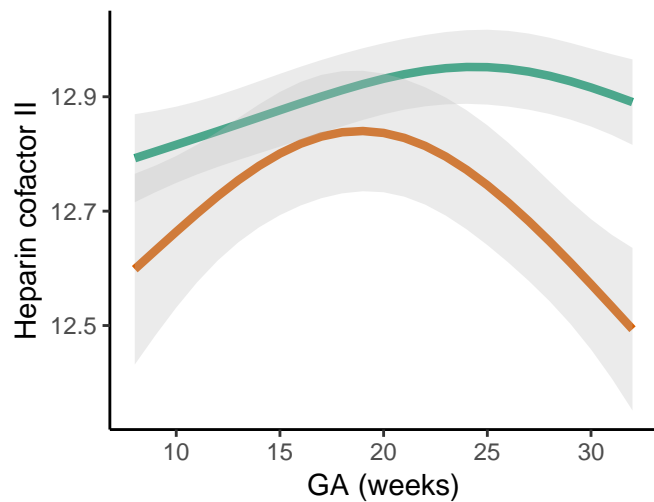

Group control mild PE severe PE

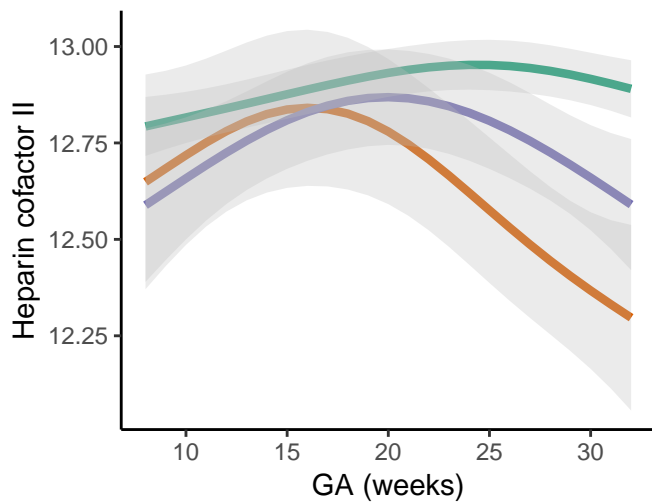

Group control MVM no MVM

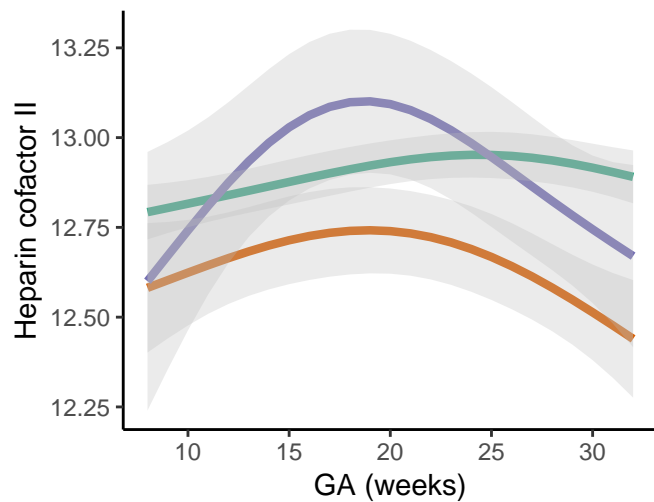

Group control PE

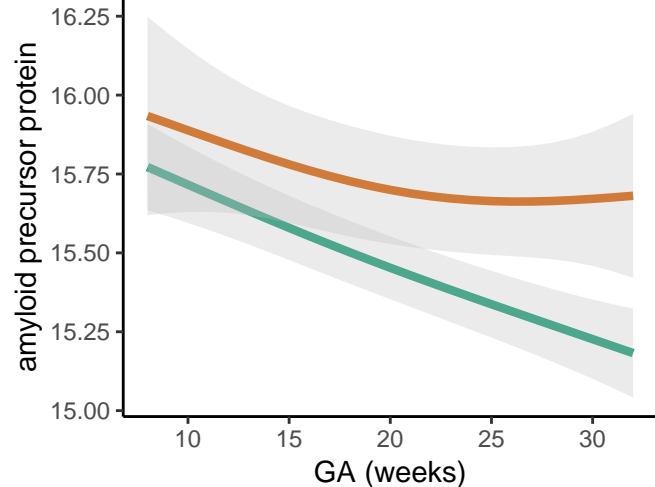

Group control mild PE severe PE

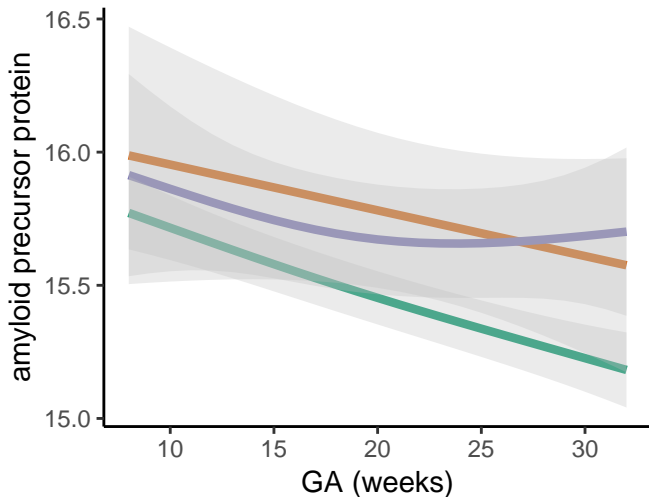

Group control MVM no MVM

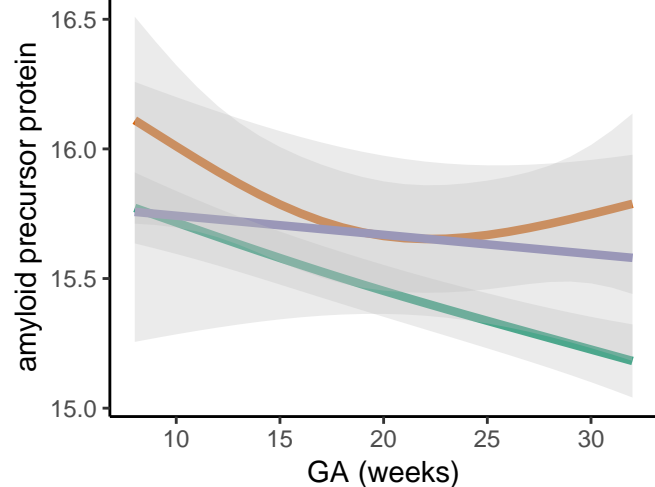

Group control PE

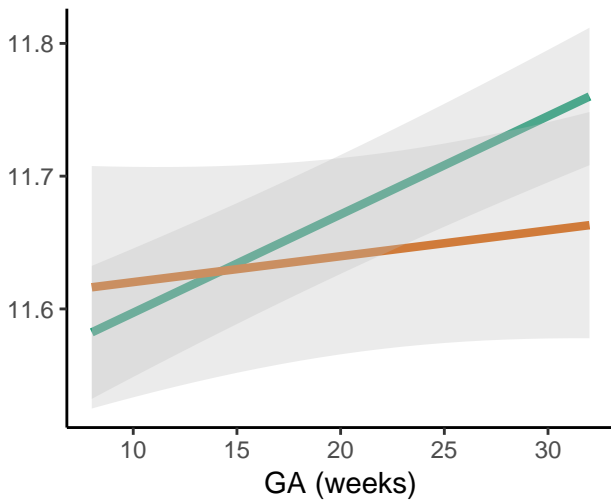

Group control mild PE severe PE

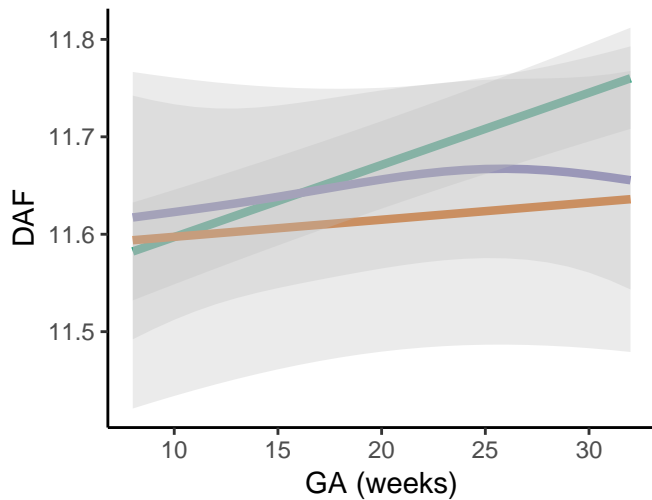

Group control MVM no MVM

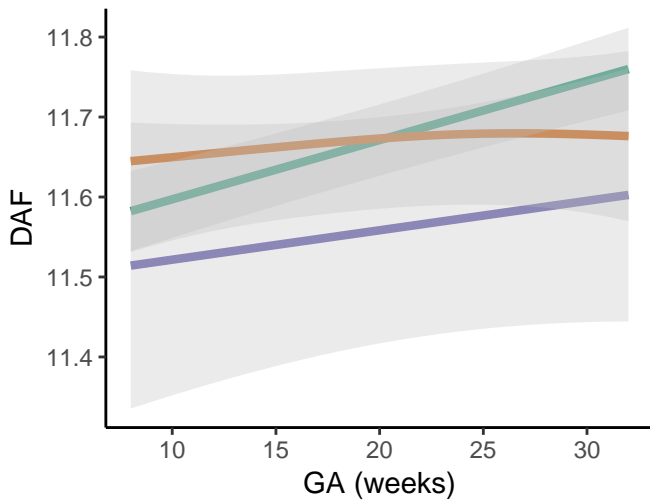

Group control PE

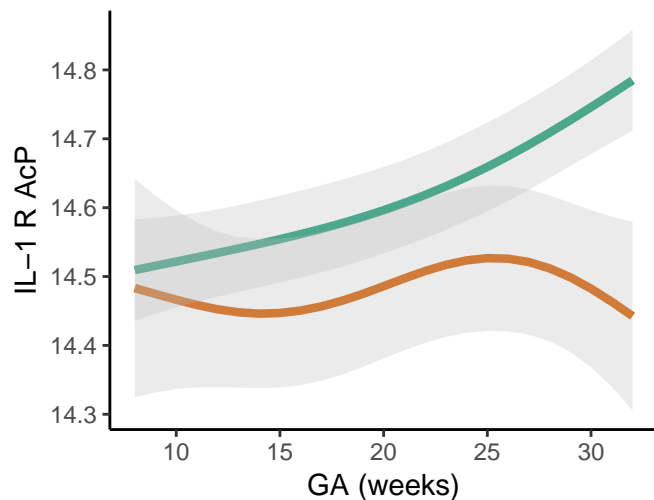

Group control mild PE severe PE

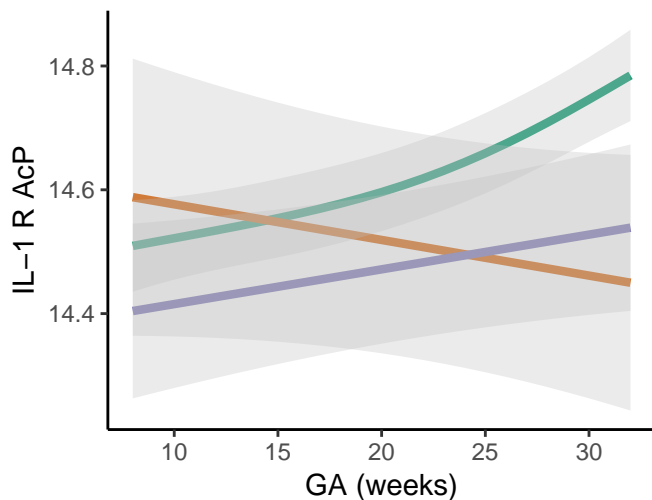

Group control MVM no MVM

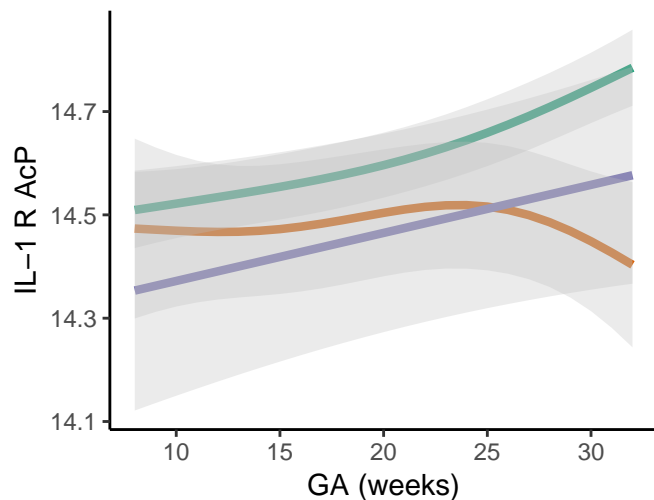

Group control PE

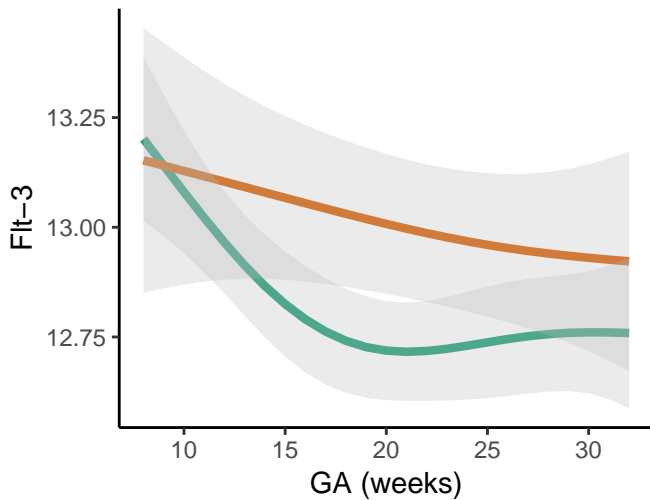

Group control mild PE severe PE

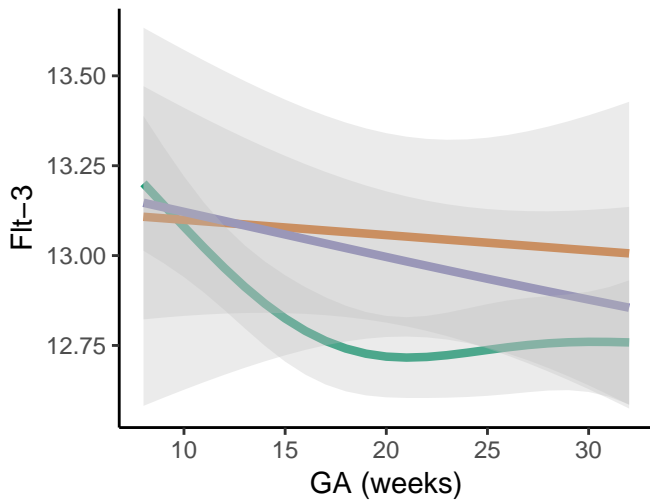

Group control MVM no MVM

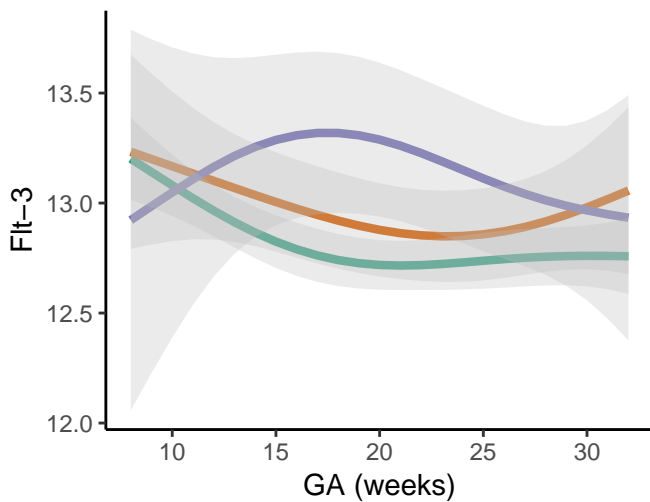

Group control PE

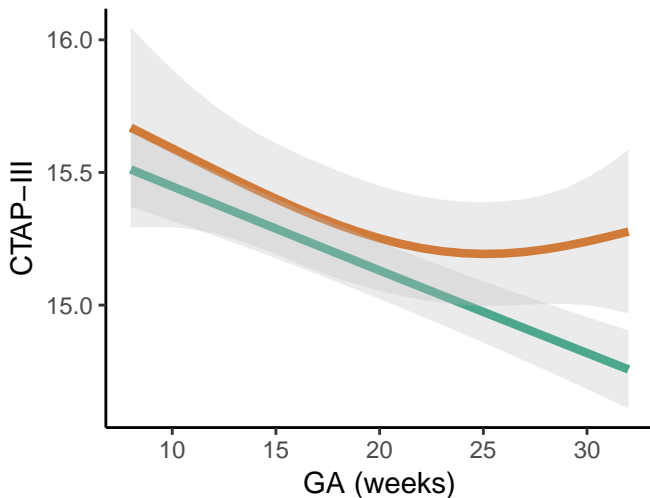

Group control mild PE severe PE

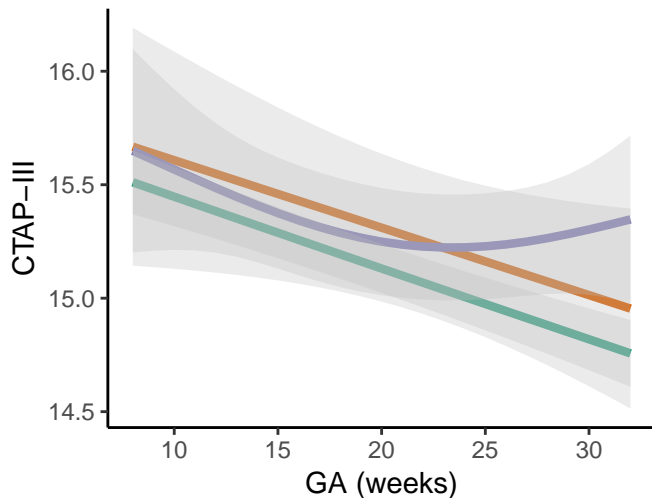

Group control MVM no MVM

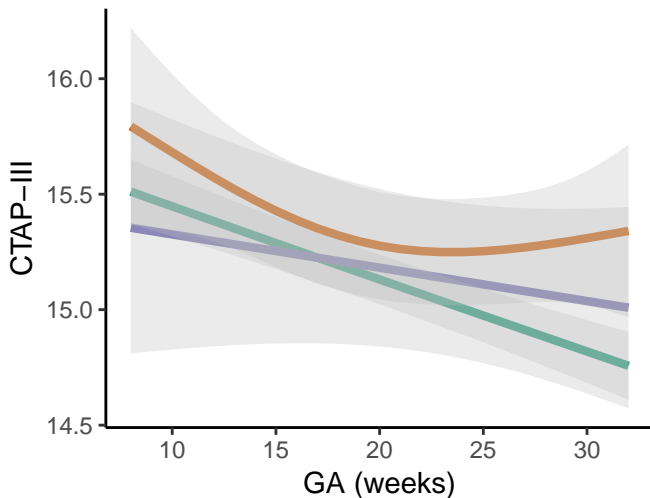

Group control PE

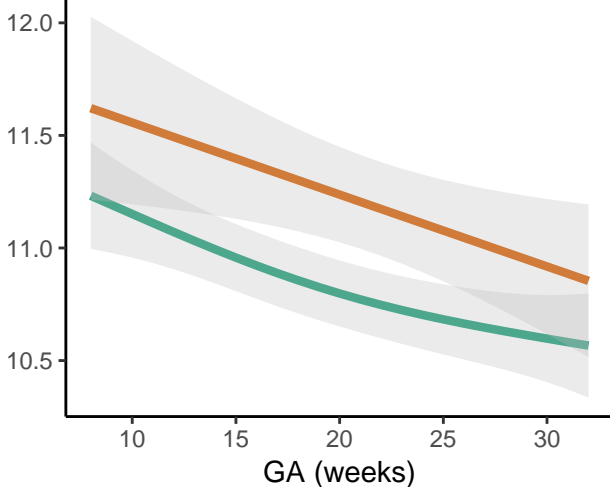

Group control mild PE severe PE

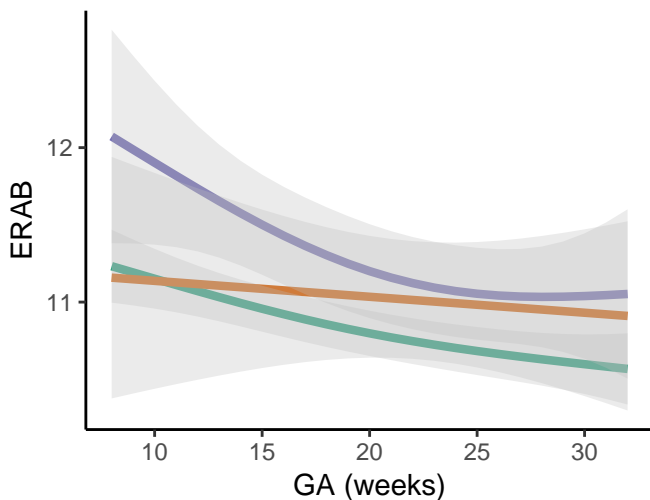

Group control MVM no MVM

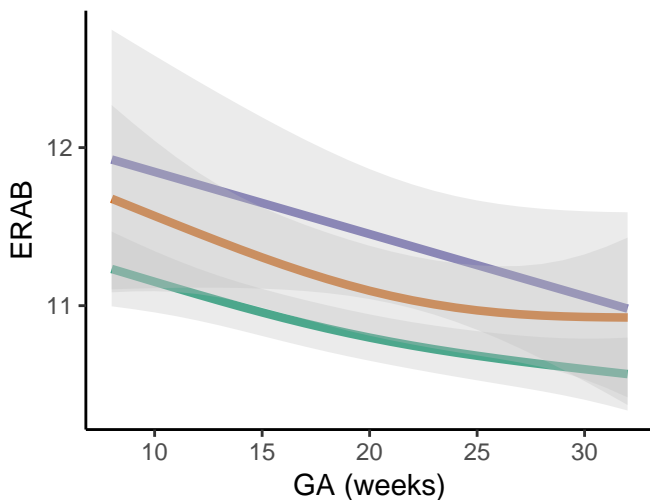

Group control PE

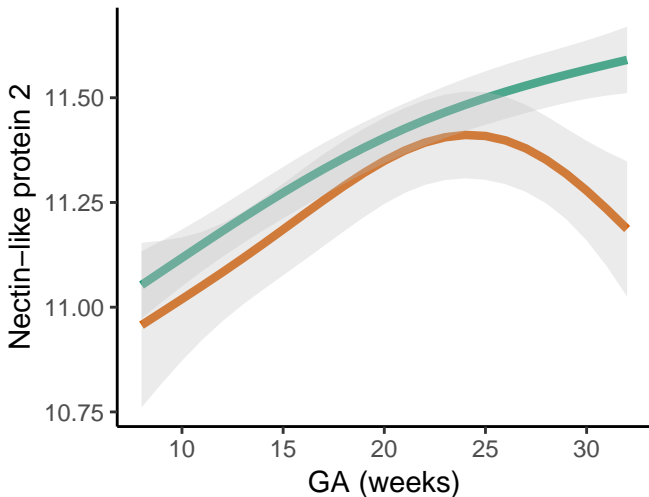

Group control mild PE severe PE

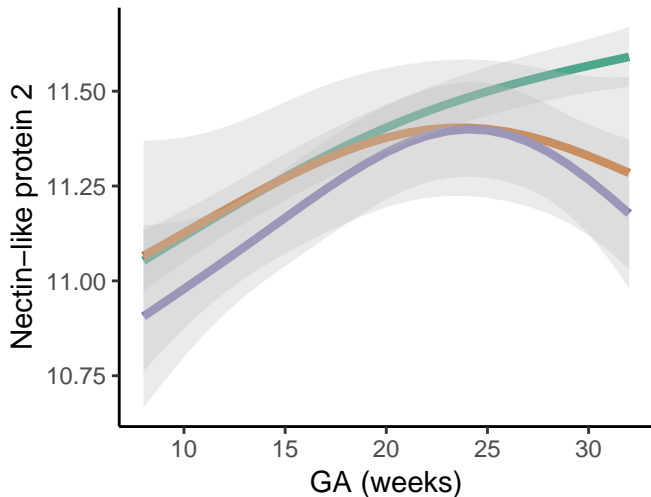

Group control MVM no MVM

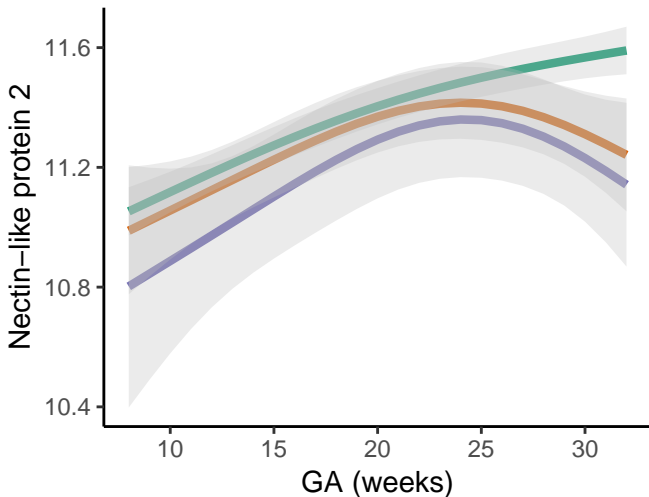



Group control PE

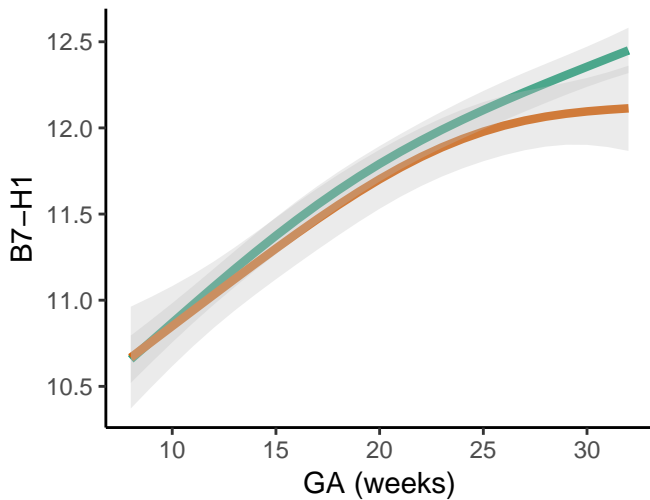

Group control mild PE severe PE

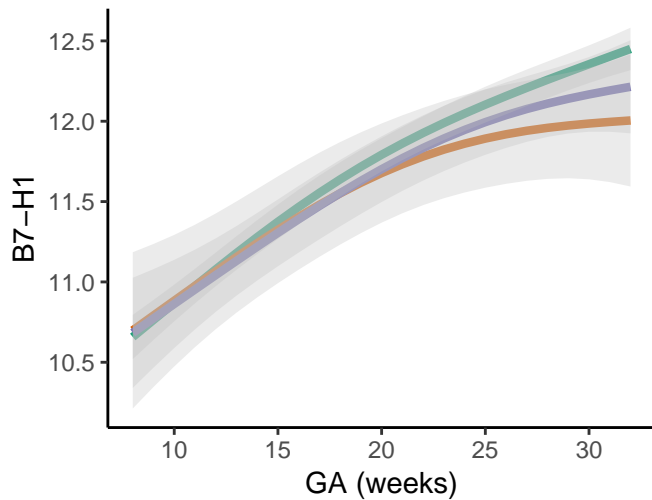

Group control MVM no MVM

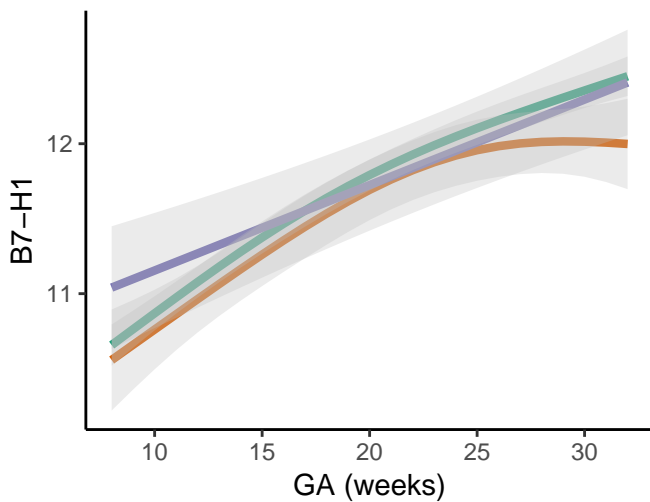

Group control PE

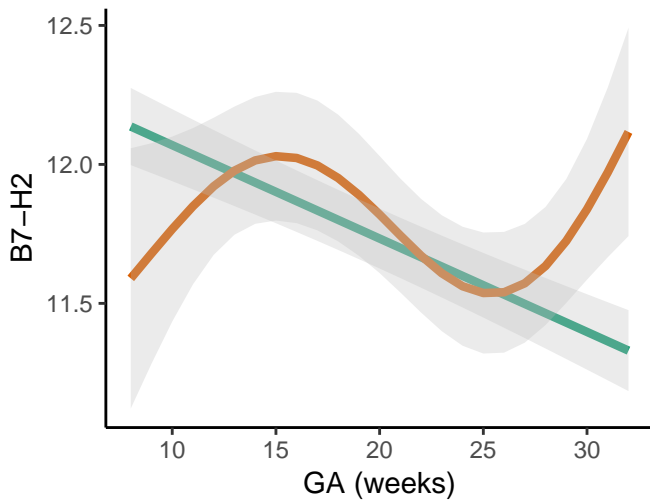

Group control mild PE severe PE

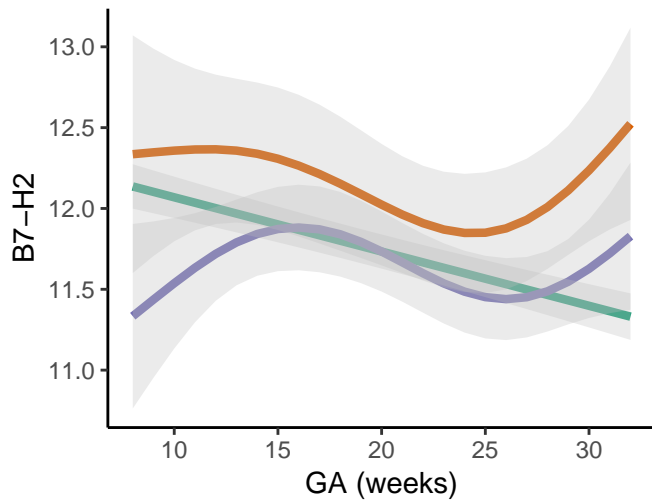

Group control MVM no MVM

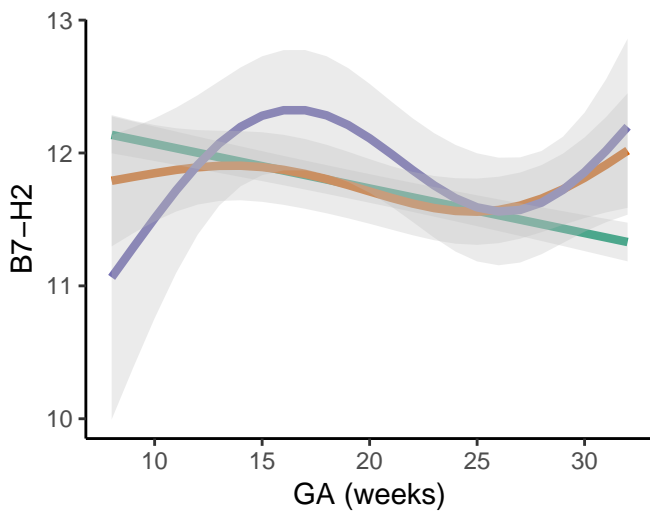

Group control PE

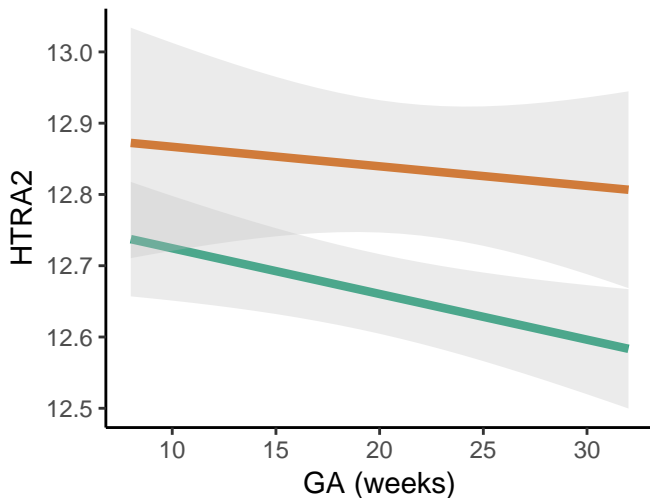

Group control mild PE severe PE

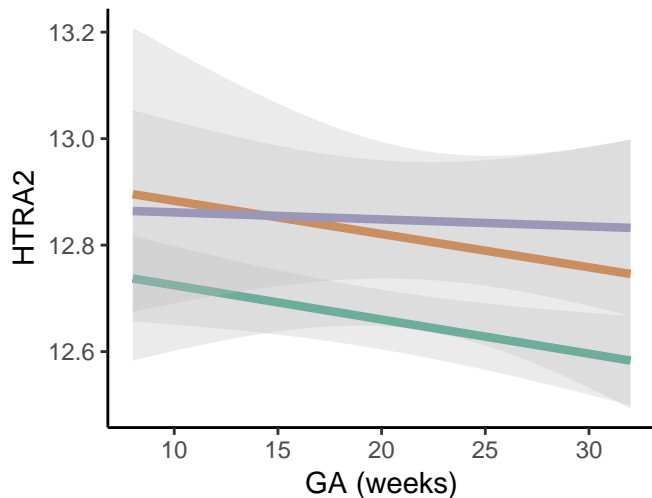

Group control MVM no MVM

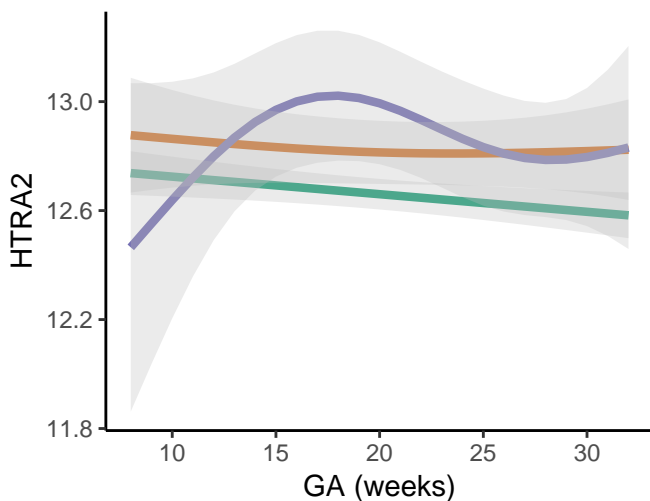

Group control PE

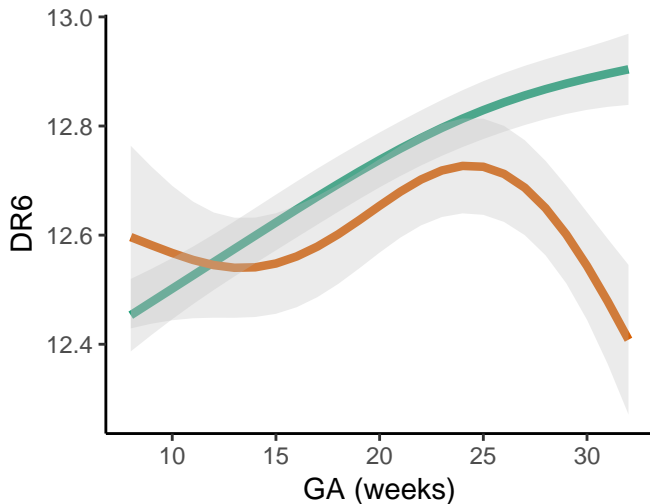

Group control mild PE severe PE

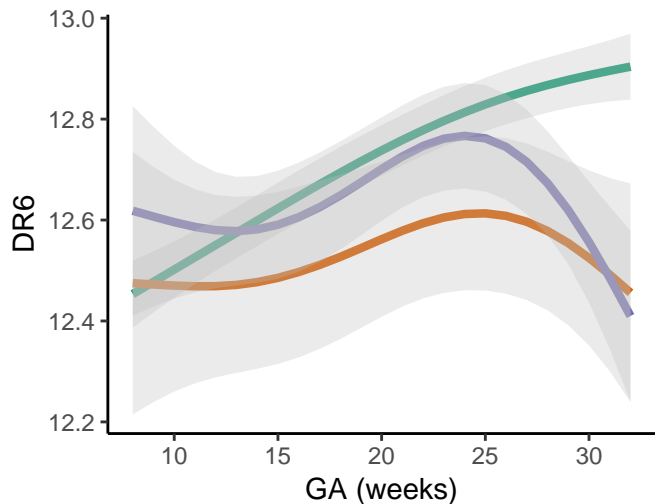

Group control MVM no MVM

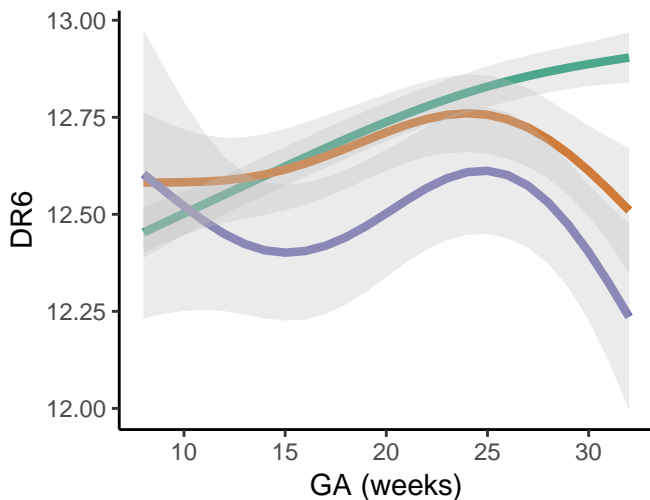

Group control PE

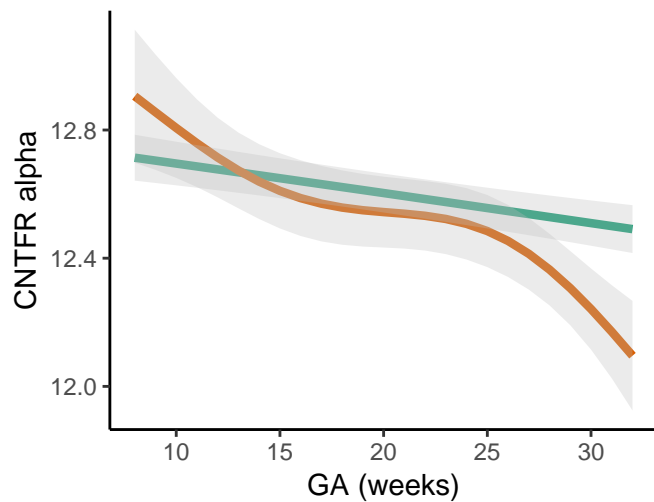

Group control mild PE severe PE

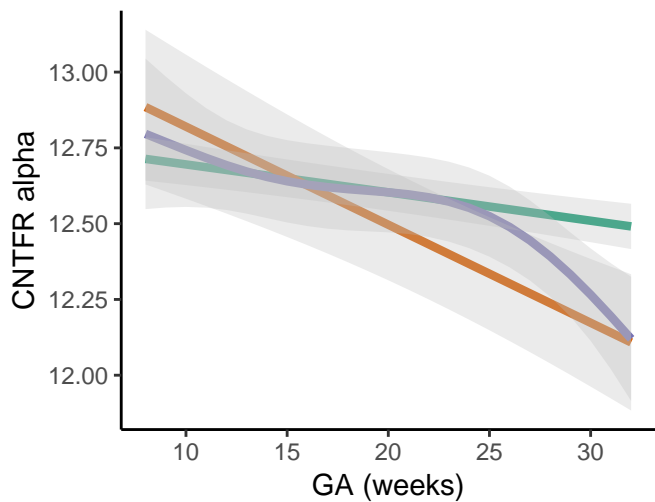

Group control MVM no MVM

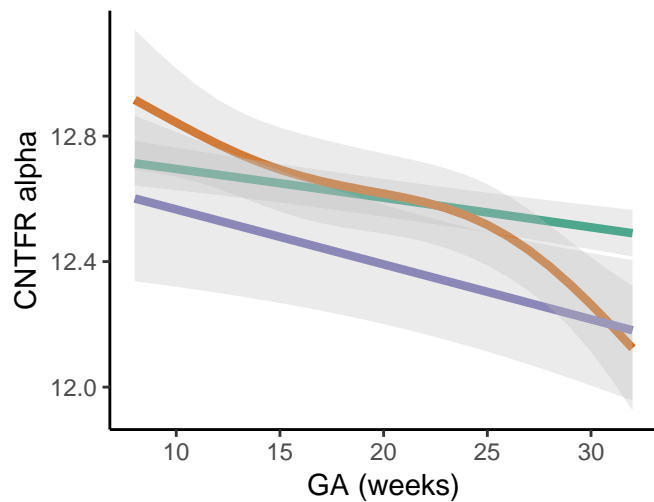

Group control PE

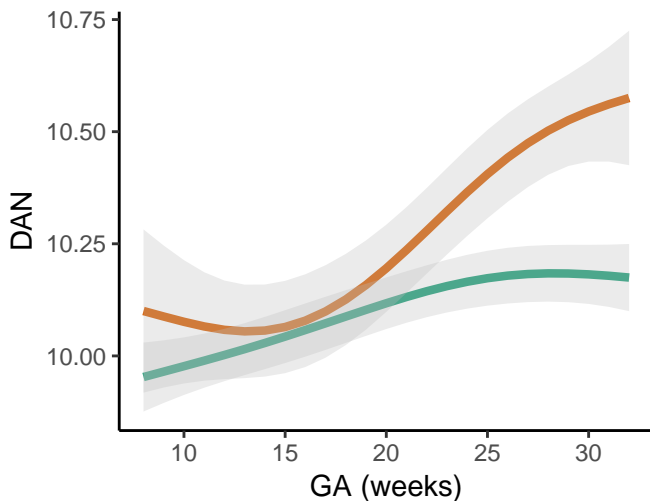

Group control mild PE severe PE

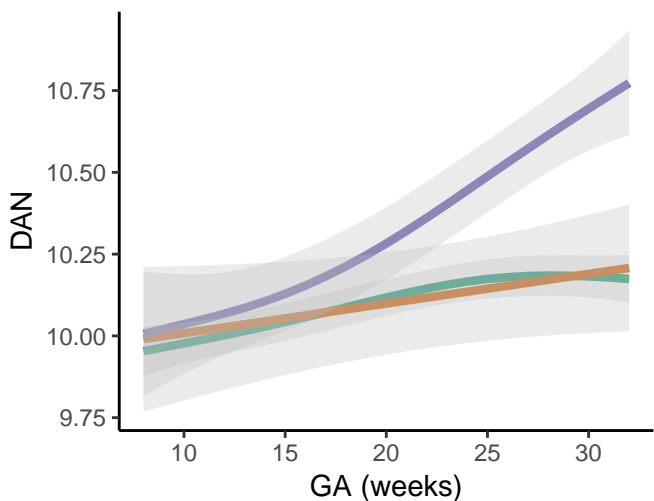

Group control MVM no MVM

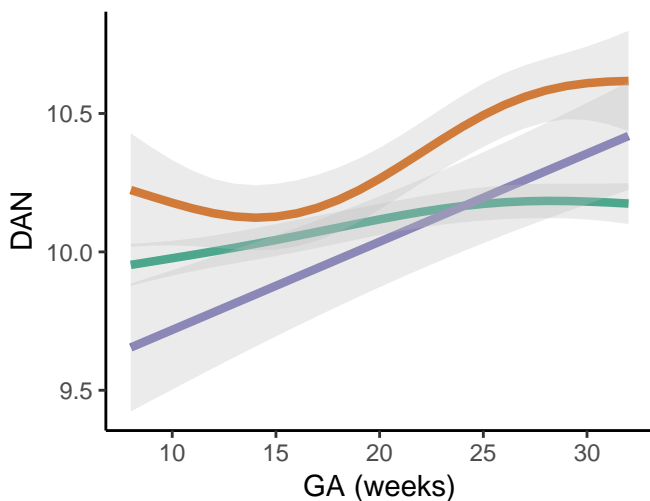

Group control PE

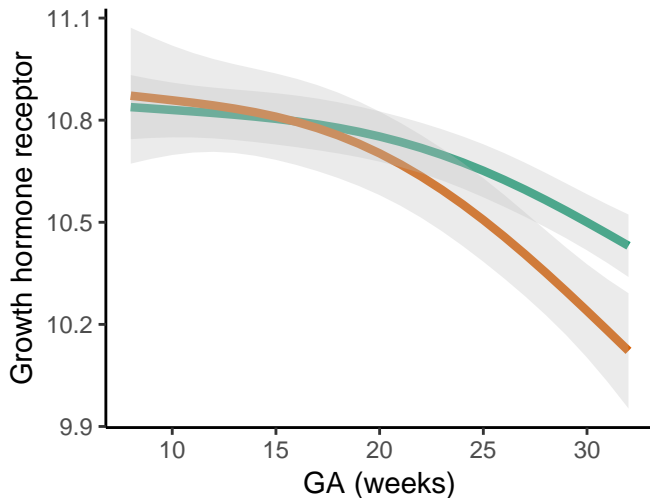

Group control mild PE severe PE

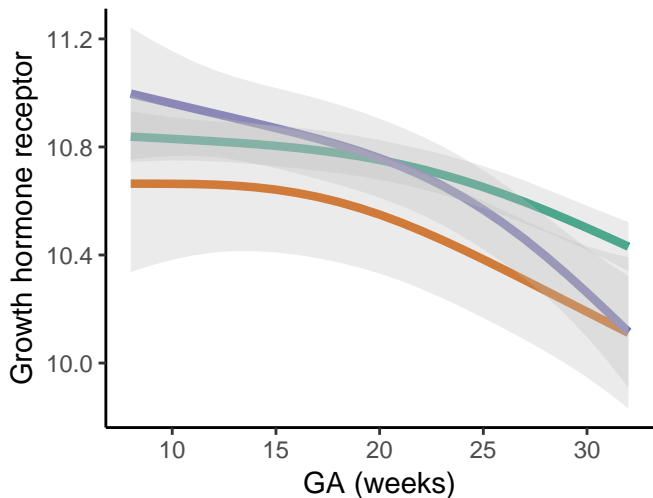

Group control MVM no MVM

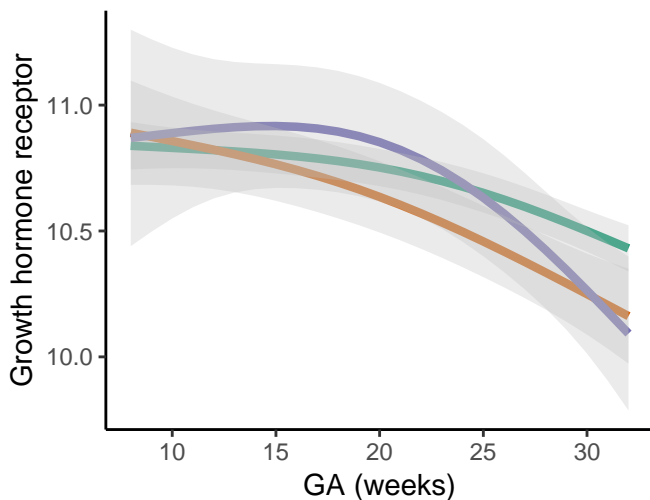

Group control PE

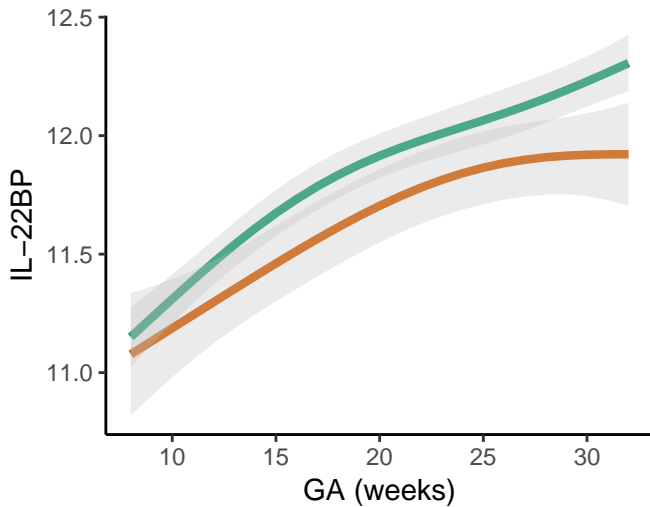

Group control mild PE severe PE

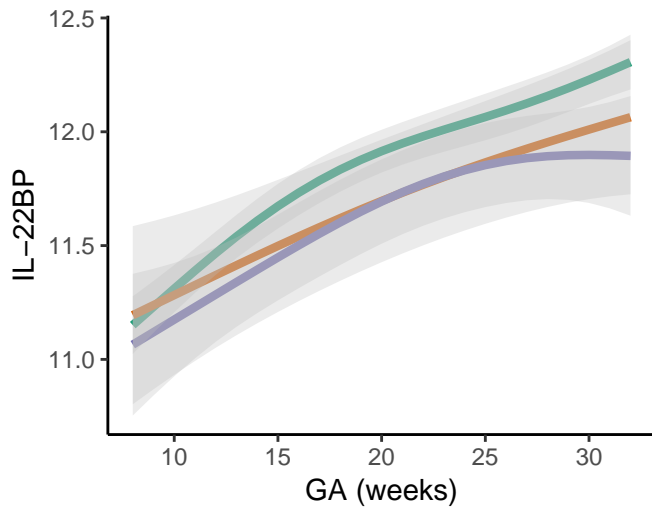

Group control MVM no MVM

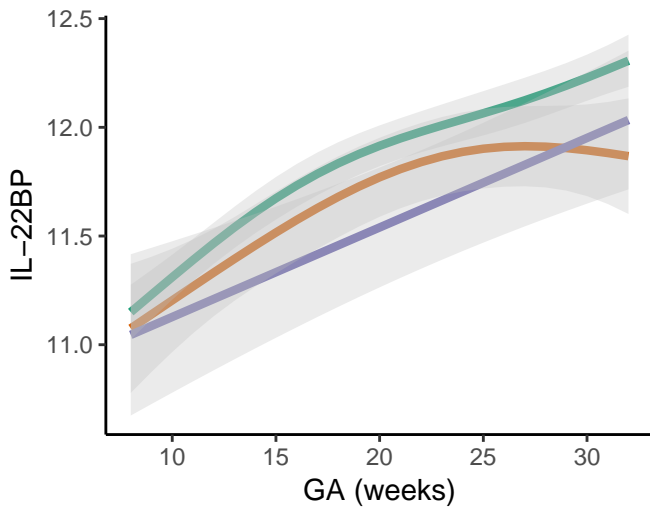



Group control PE

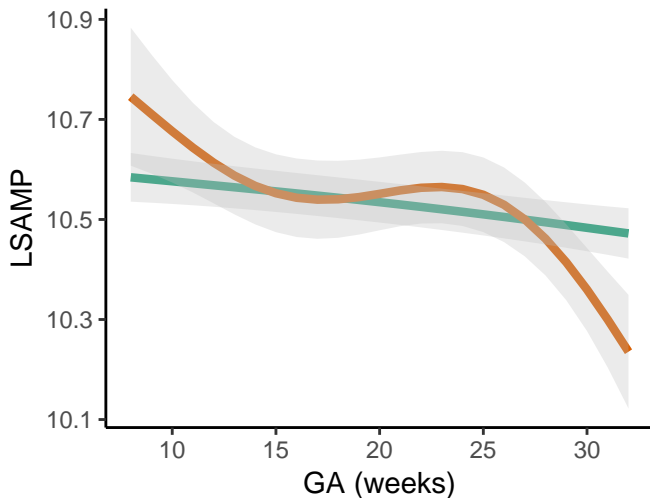

Group control mild PE severe PE

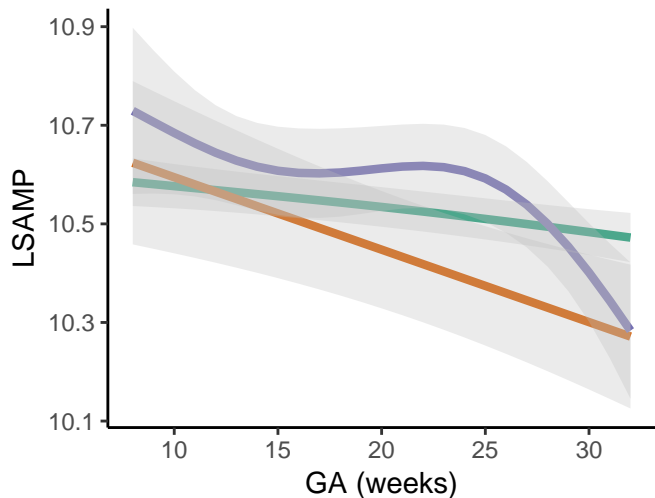

Group control MVM no MVM

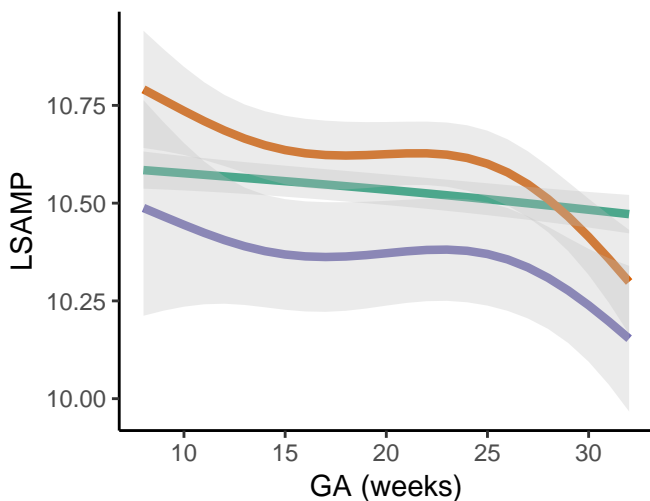

Group control PE

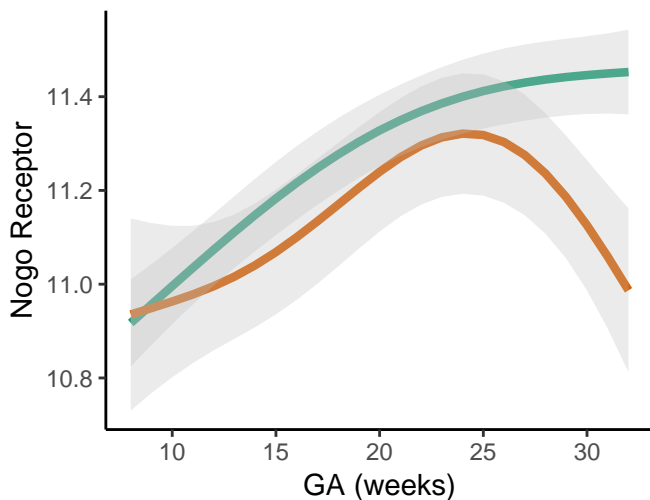

Group control mild PE severe PE

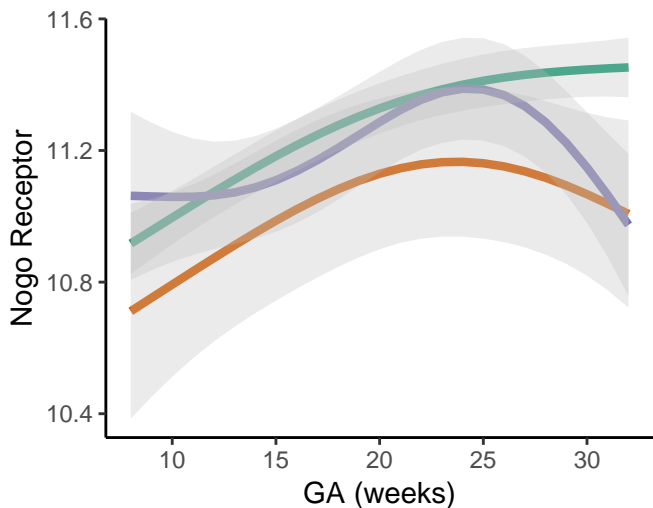

Group control MVM no MVM

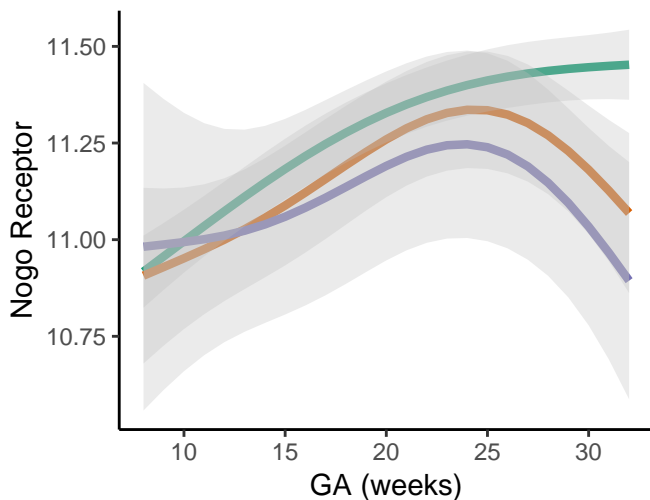

Group control PE

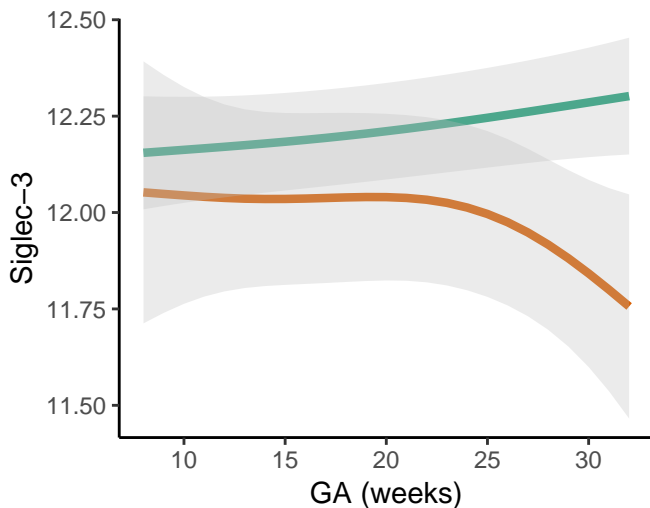

Group control mild PE severe PE

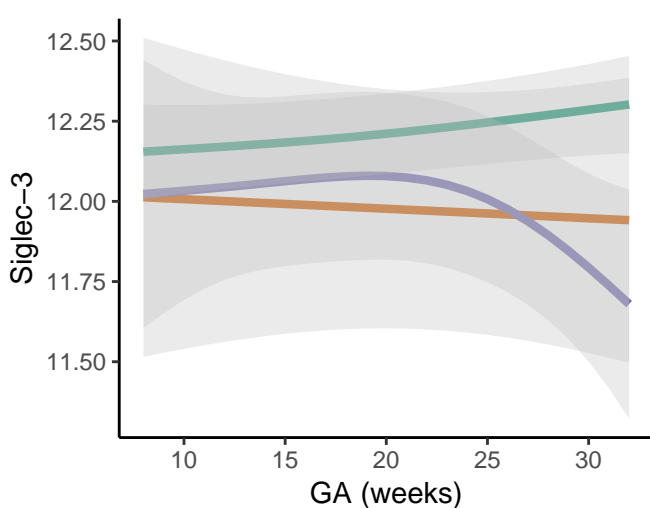

Group control MVM no MVM

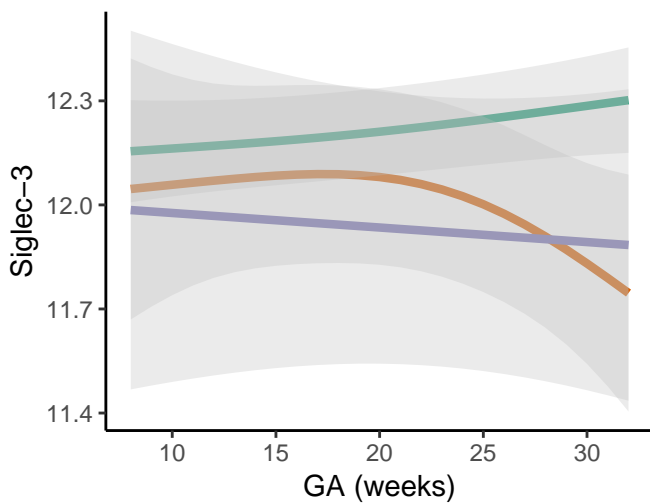

Group control PE

Group control mild PE severe PE

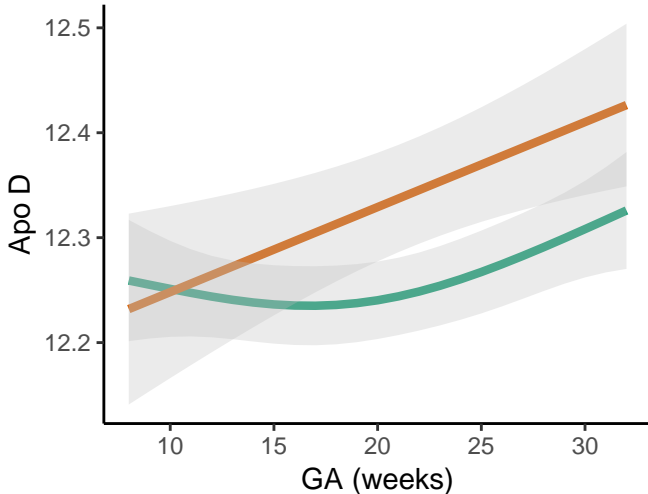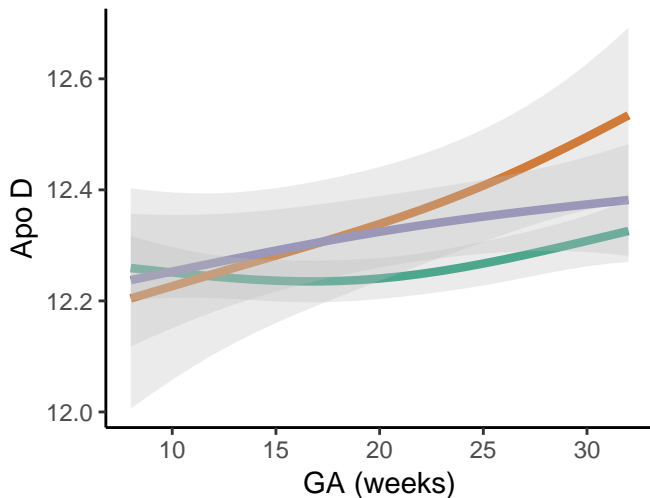

Group control MVM no MVM

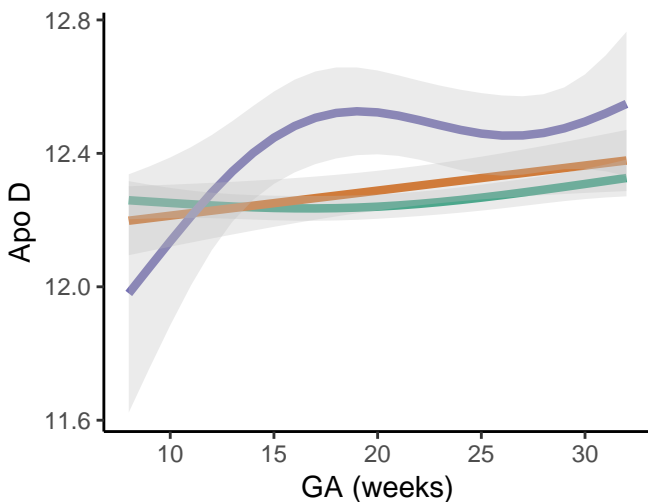

Group control PE

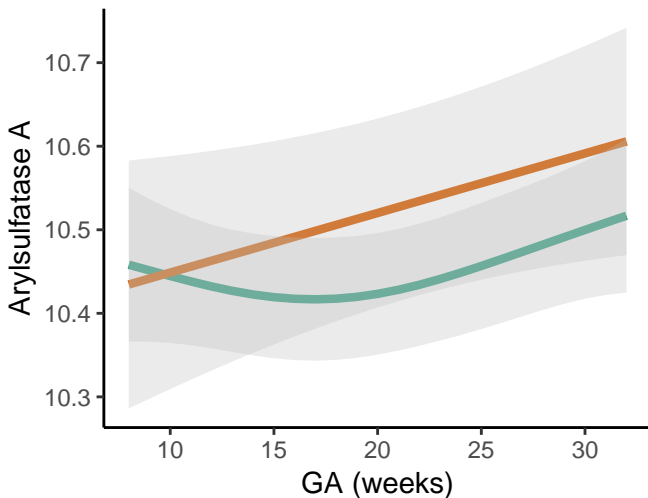

Group control mild PE severe PE

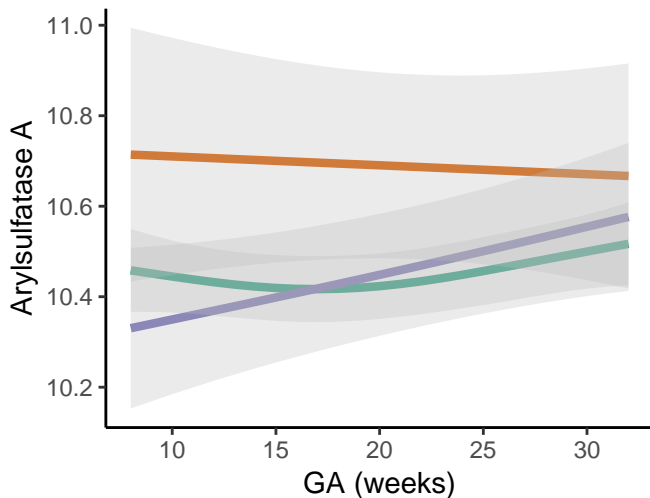

Group control MVM no MVM

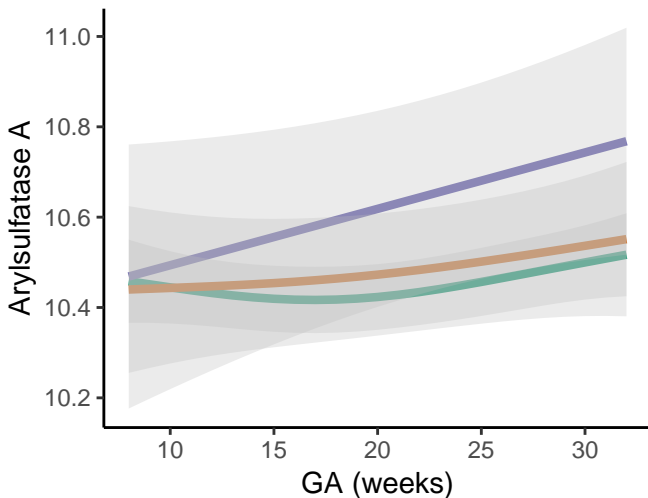

Group control PE

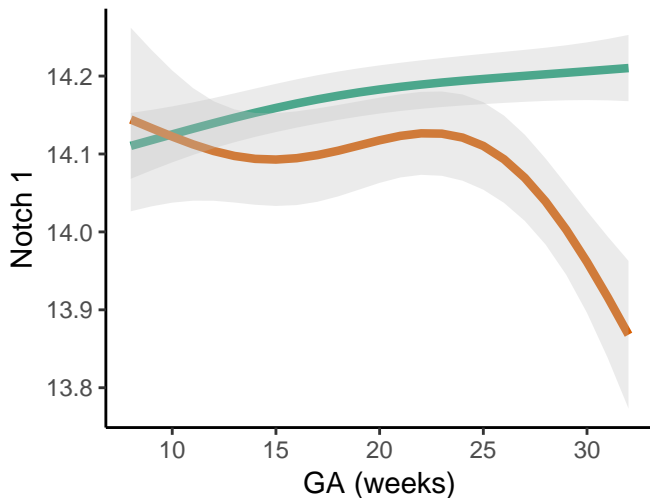

Group control mild PE severe PE

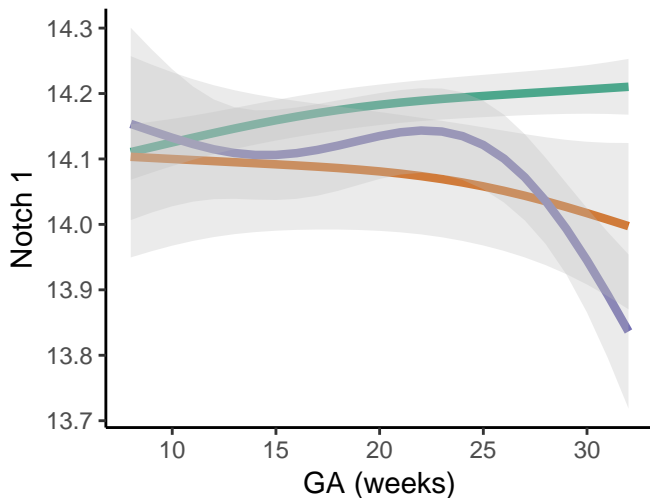

Group control MVM no MVM

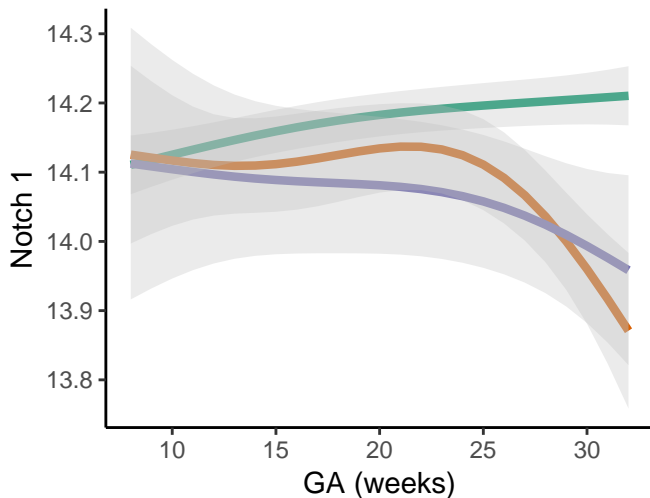

Group control PE

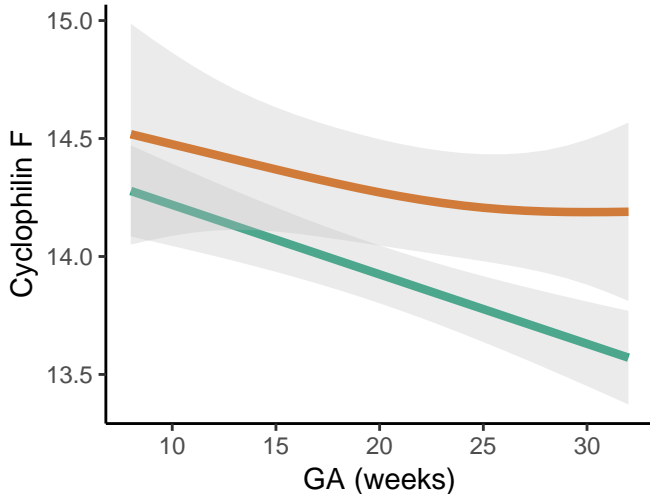

Group control mild PE severe PE

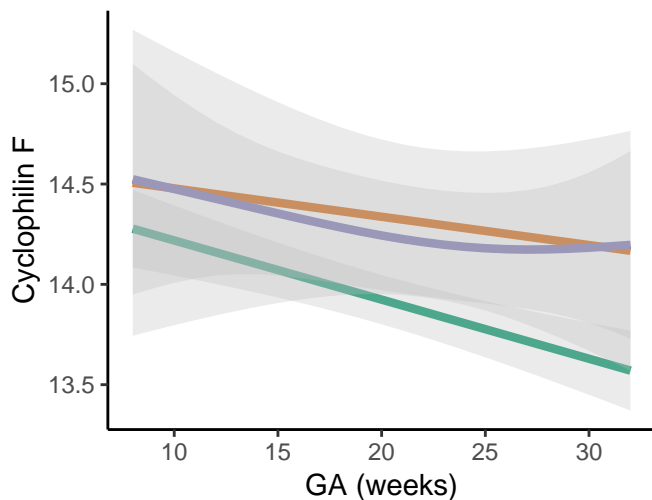

Group control MVM no MVM

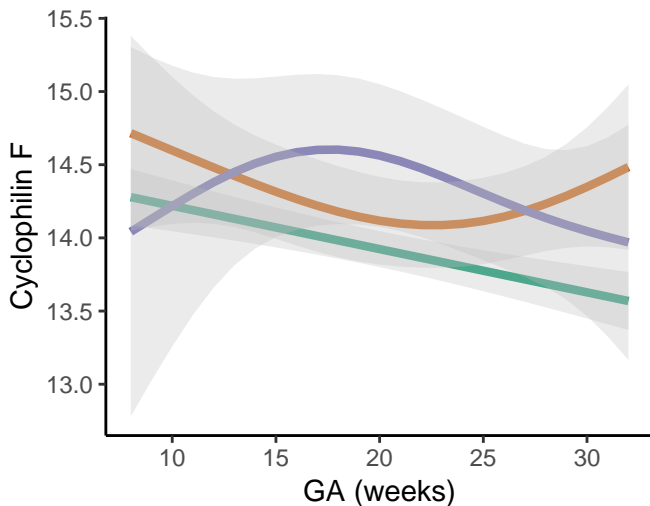

Group control PE

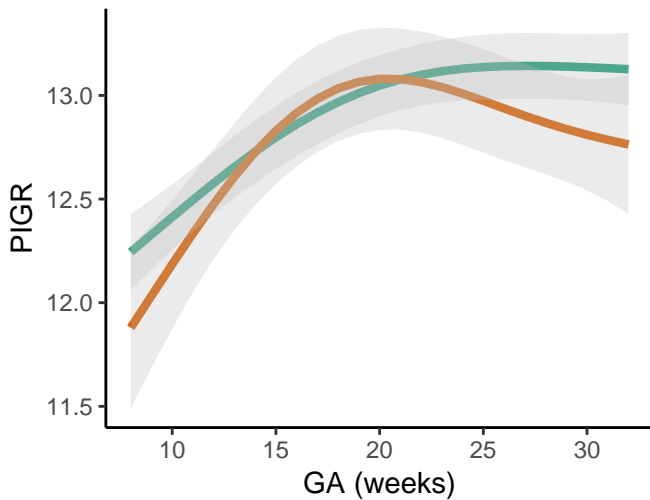

Group control mild PE severe PE

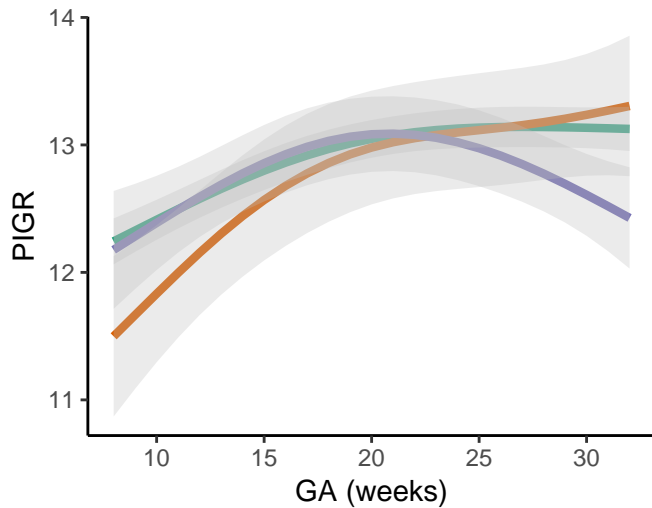

Group control MVM no MVM

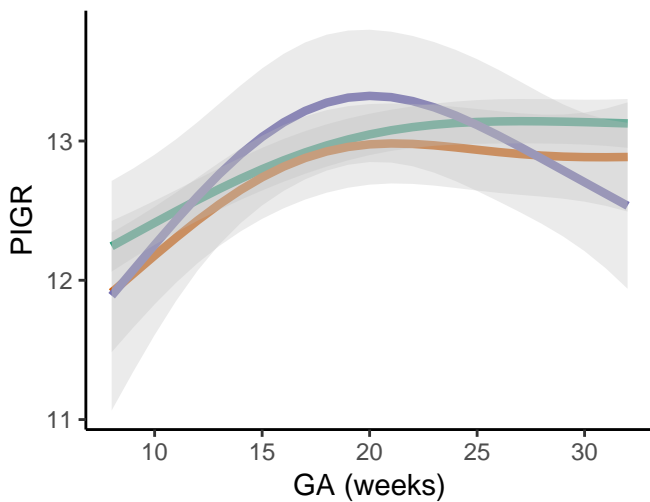



Group control PE

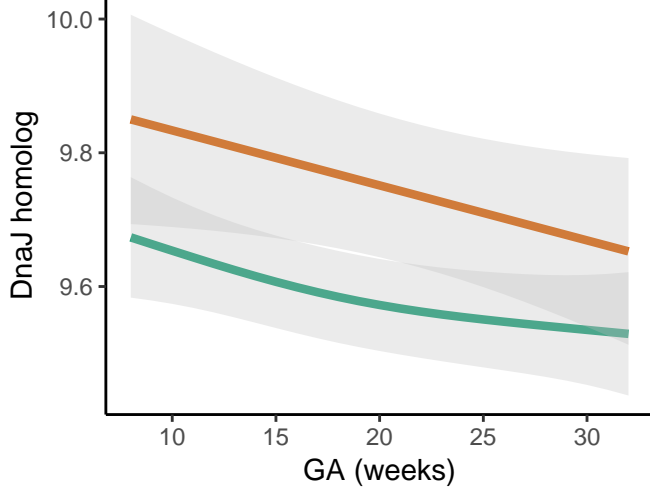

Group control mild PE severe PE

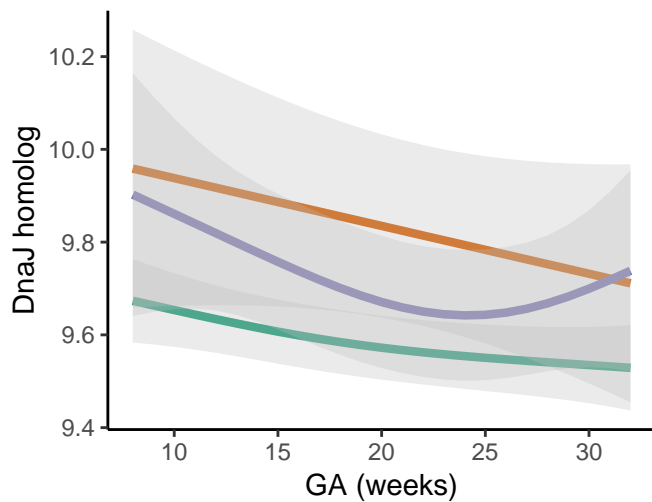

Group control MVM no MVM

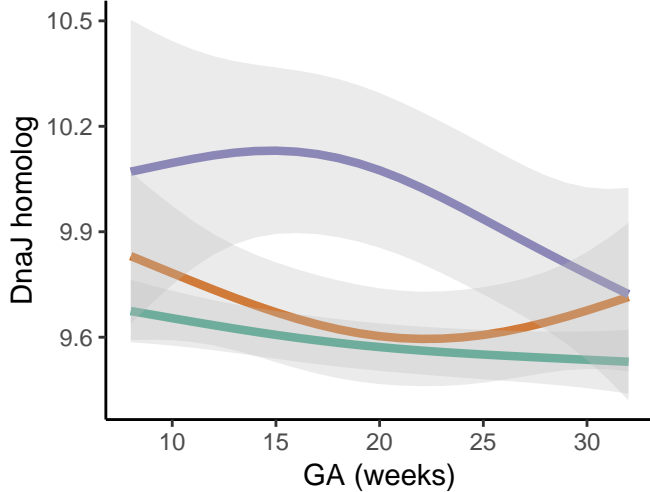

Group control PE

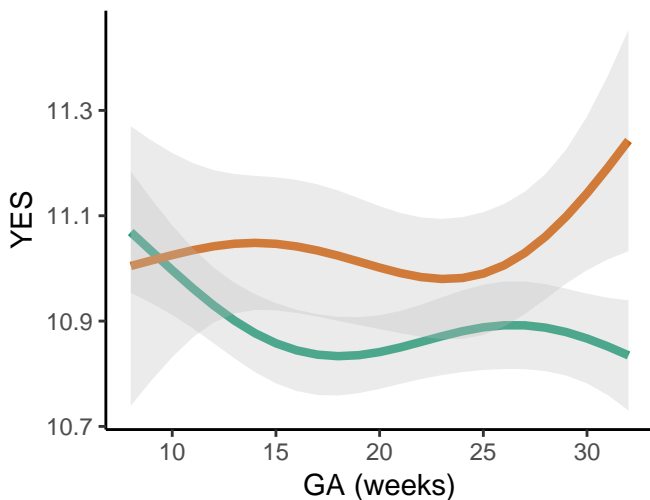

Group control mild PE severe PE

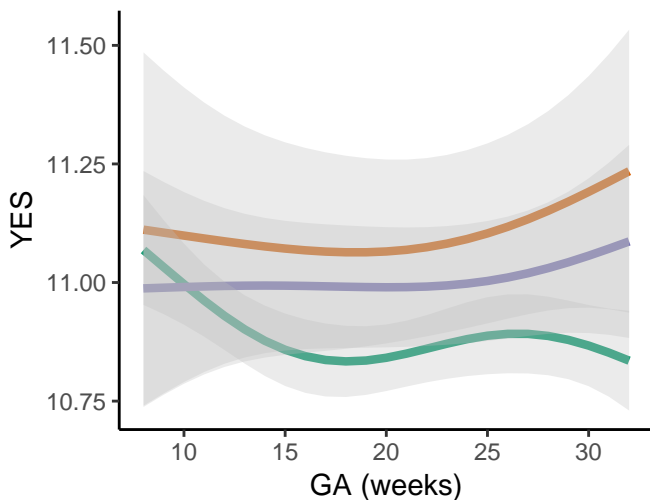

Group control MVM no MVM

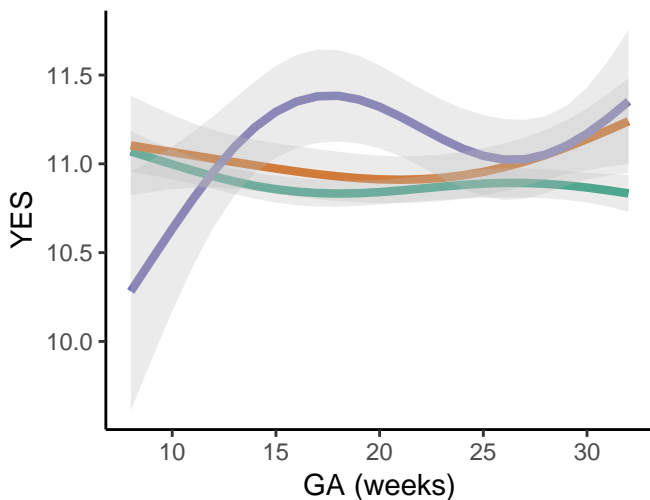

Group control PE

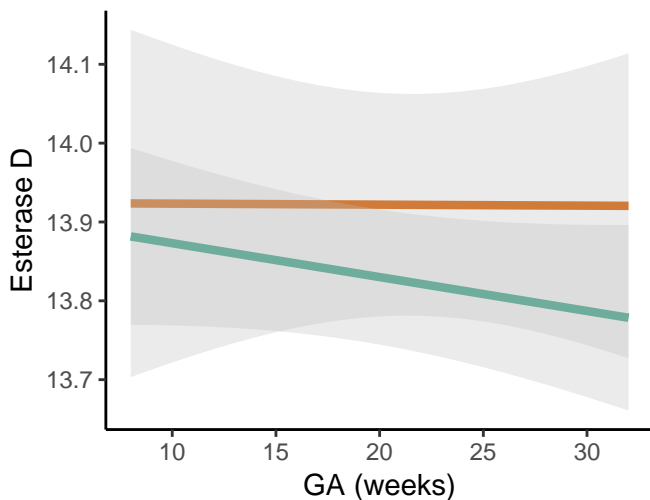

Group control mild PE severe PE

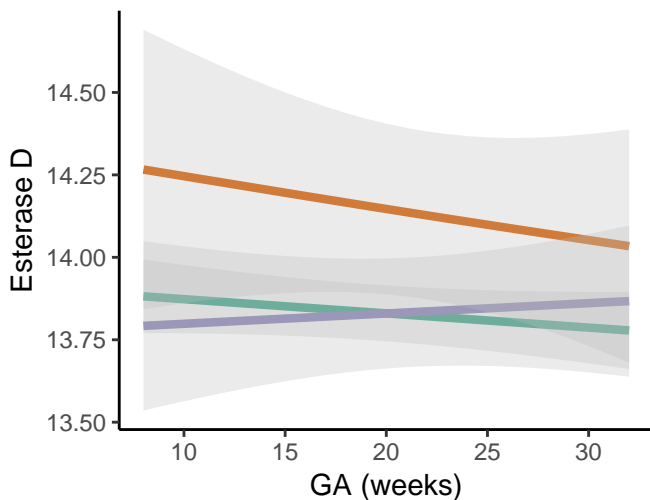

Group control MVM no MVM

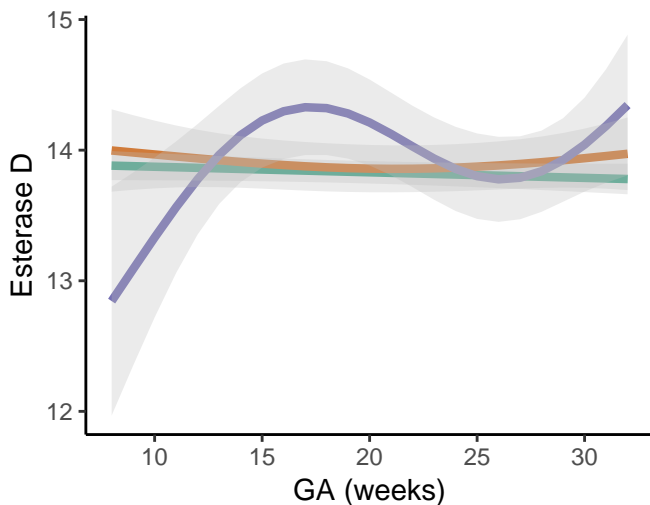

Group control PE

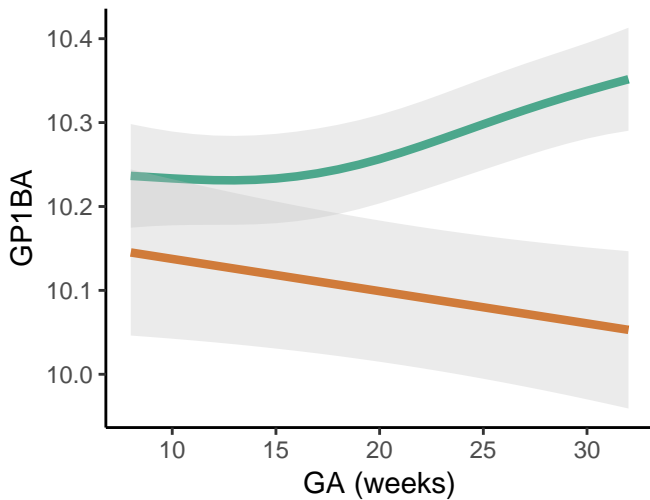

Group control mild PE severe PE

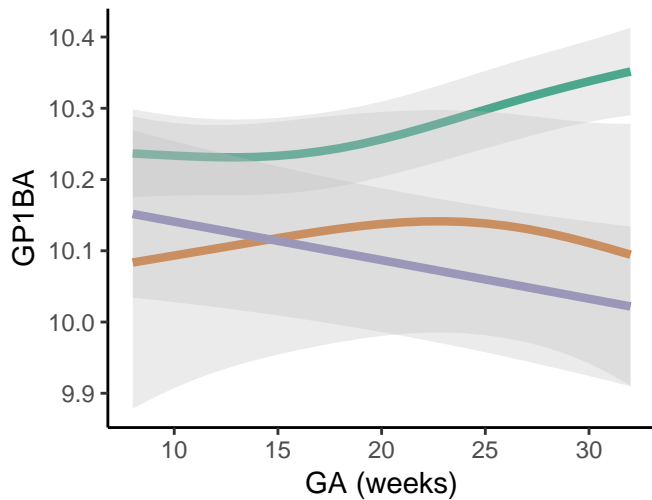

Group control MVM no MVM

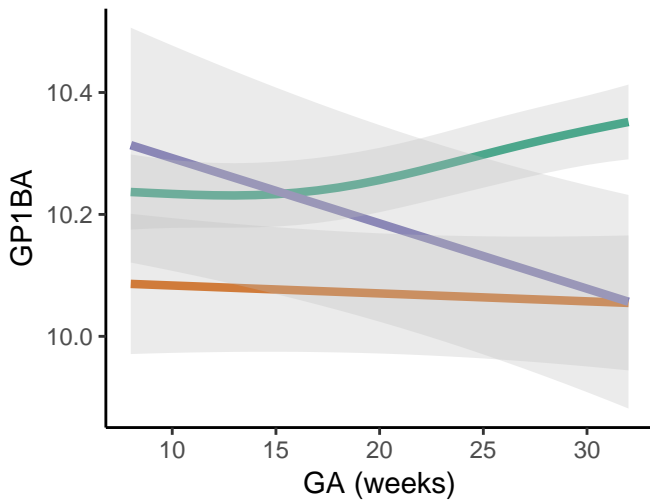

Group control PE

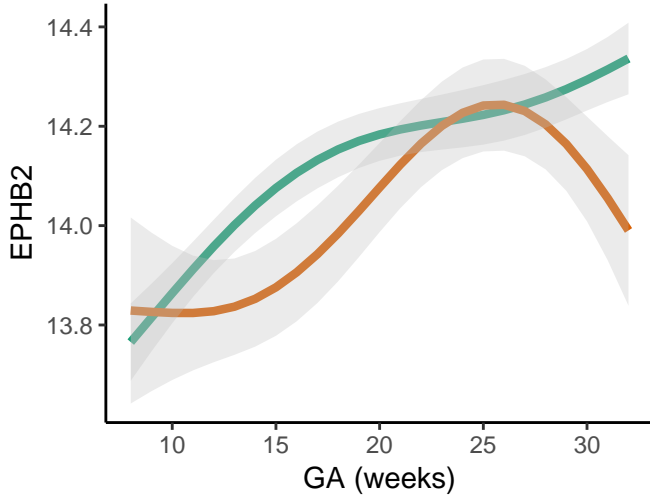

Group control mild PE severe PE

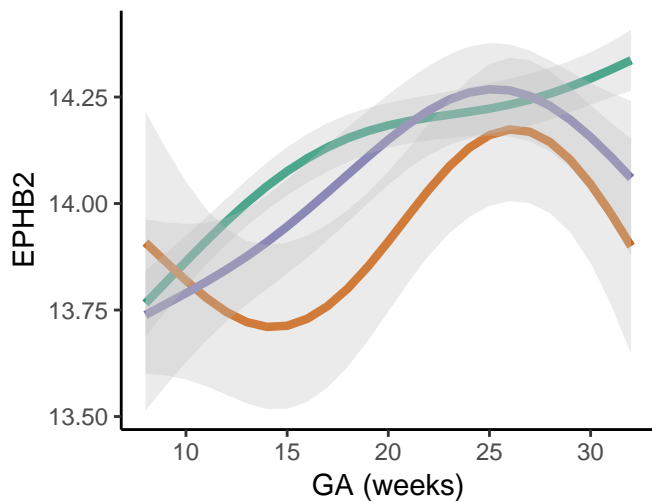

Group control MVM no MVM

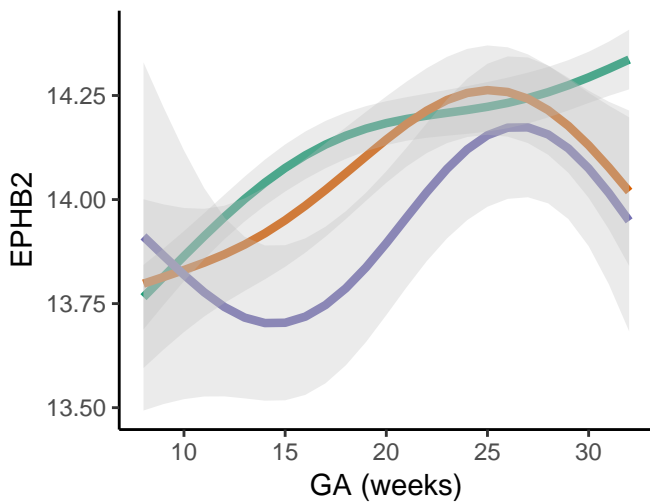

Group control PE

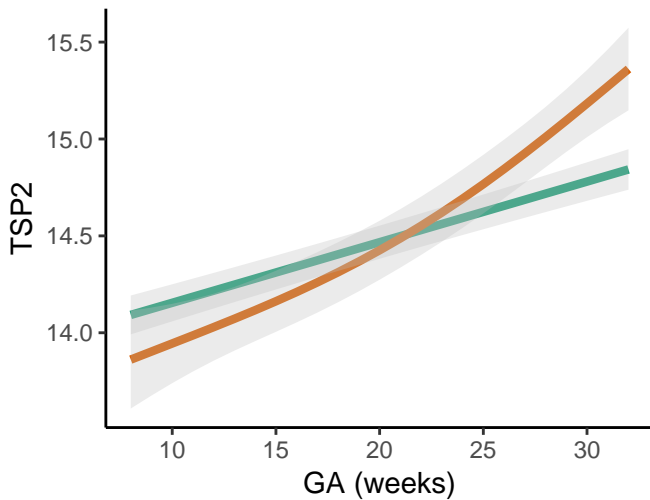

Group control mild PE severe PE

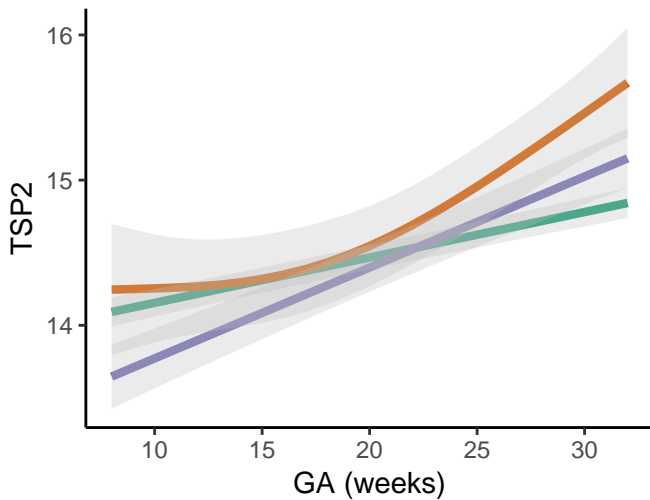

Group control MVM no MVM

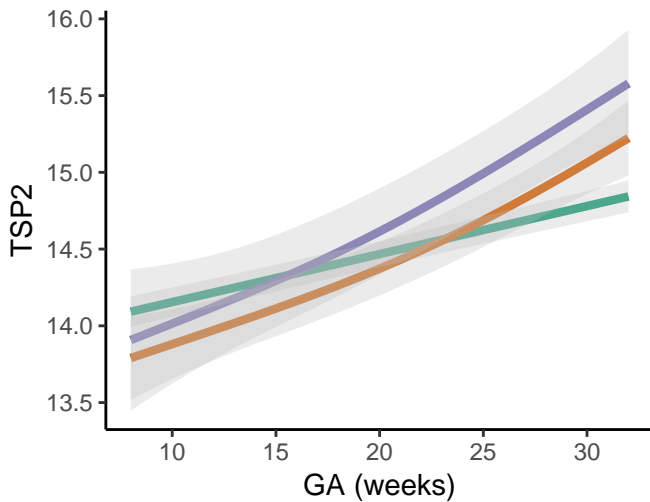

Group control PE

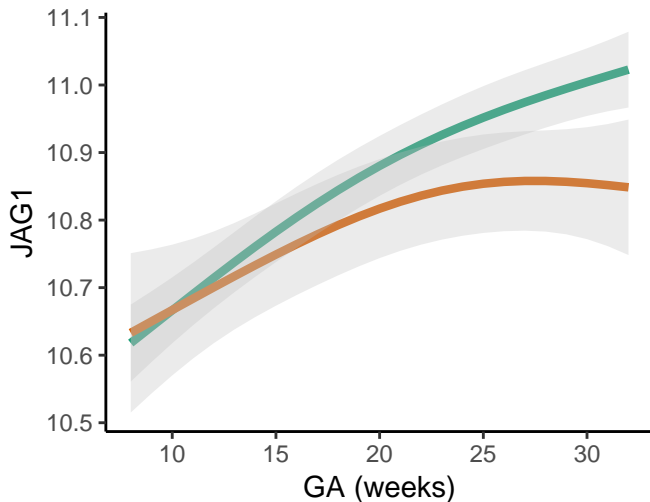

Group control mild PE severe PE

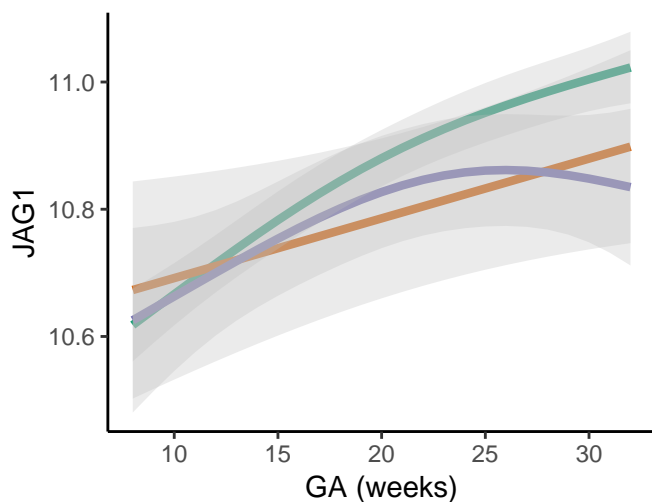

Group control MVM no MVM

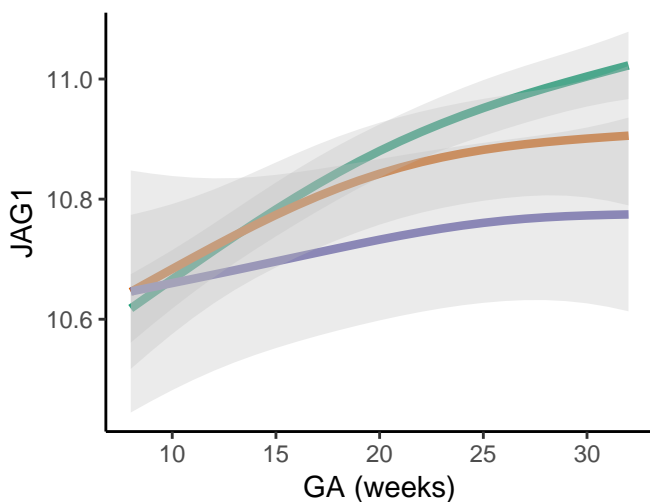

Group control PE

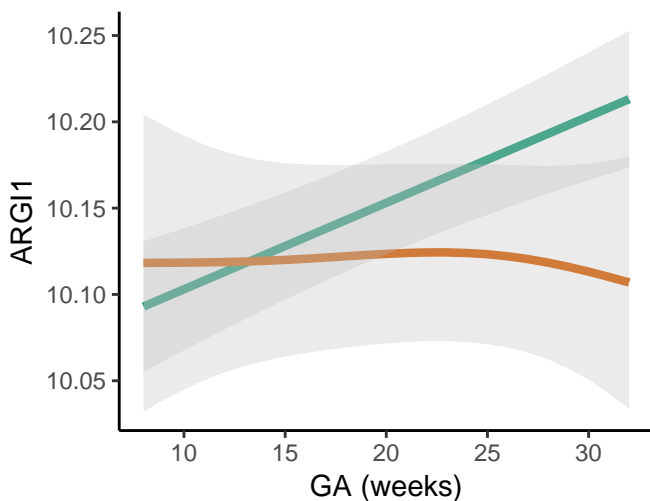

Group control mild PE severe PE

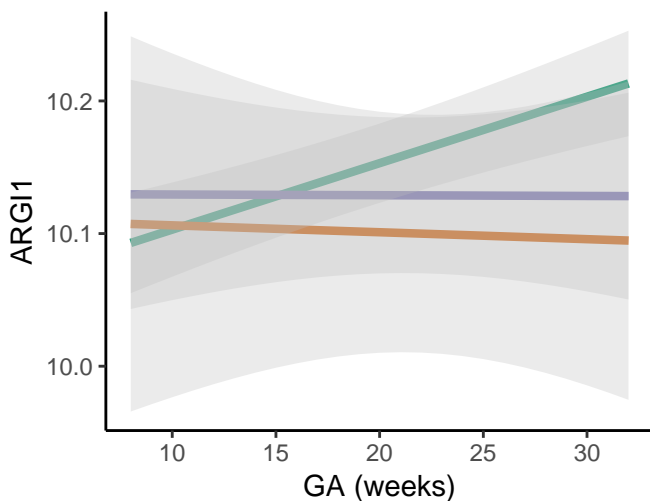

Group control MVM no MVM

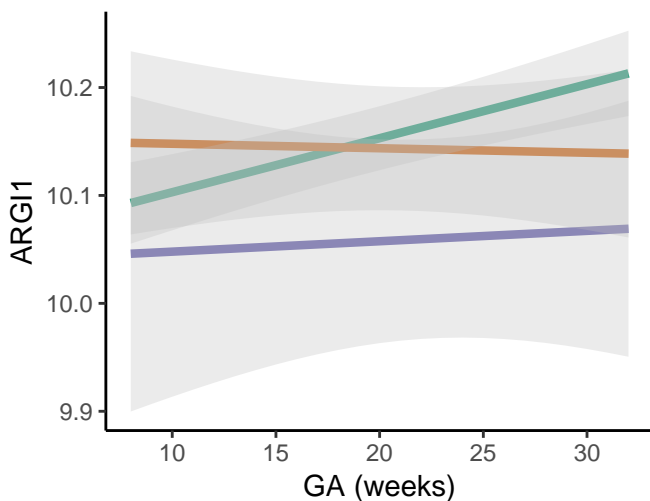



Group control PE

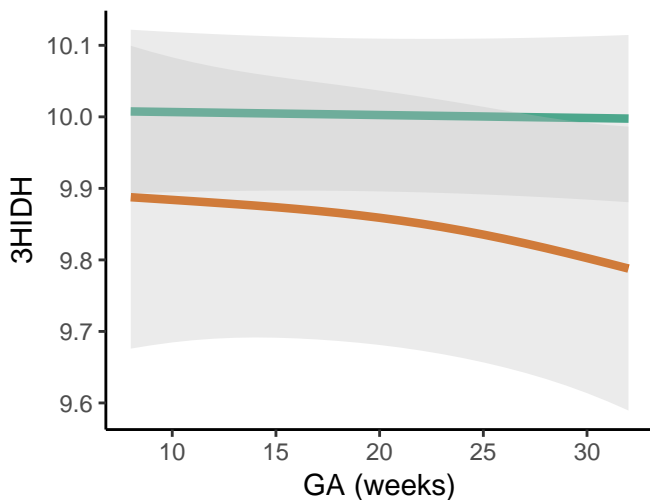

Group control mild PE severe PE

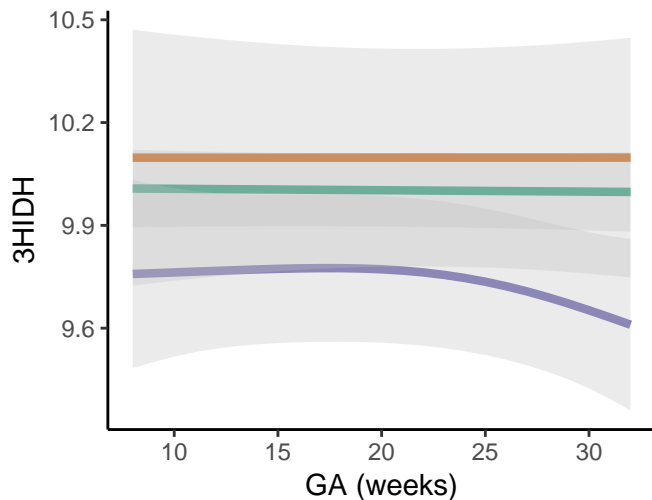

Group control MVM no MVM

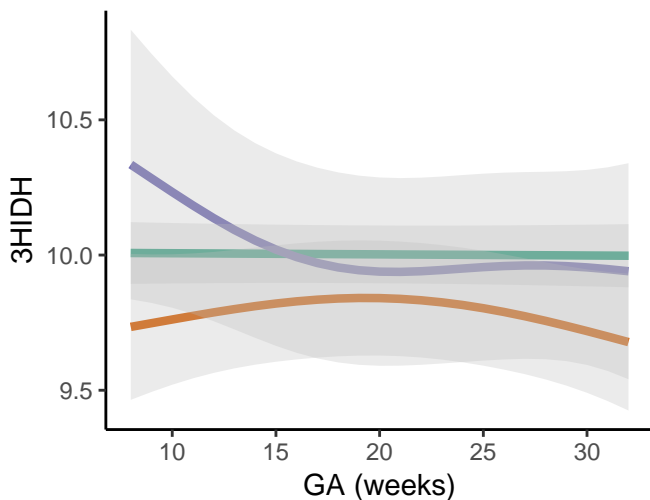

Group control PE

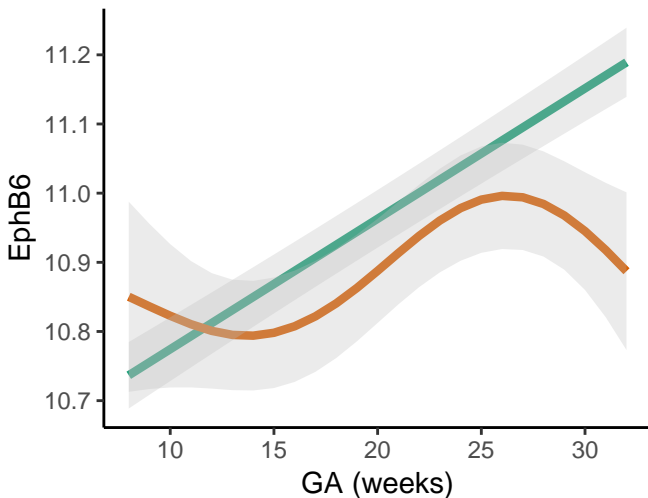

Group control mild PE severe PE

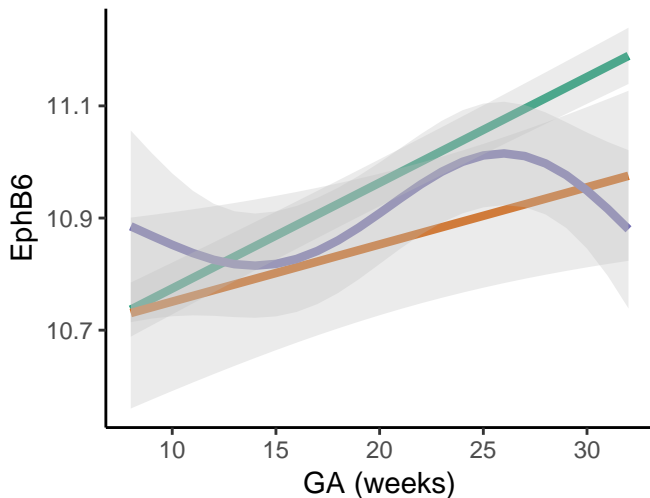

Group control MVM no MVM

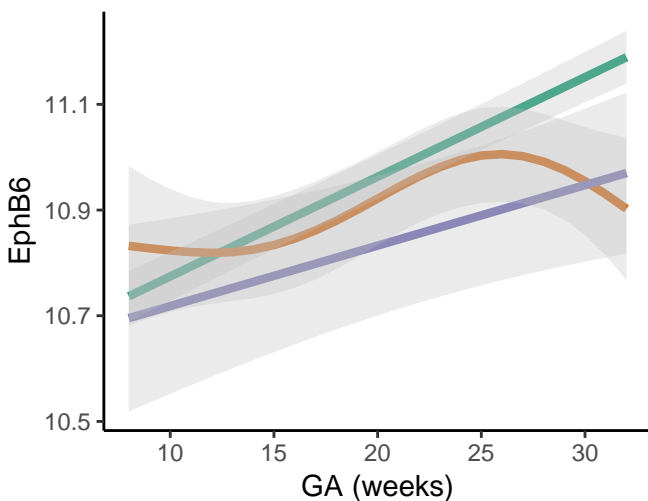

Group control PE

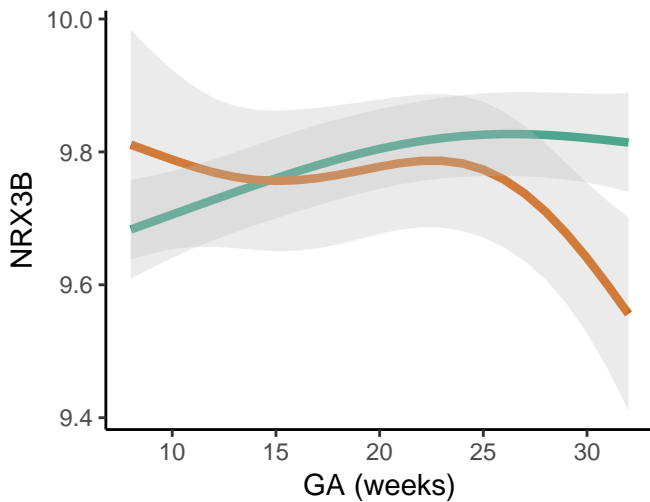

Group control mild PE severe PE

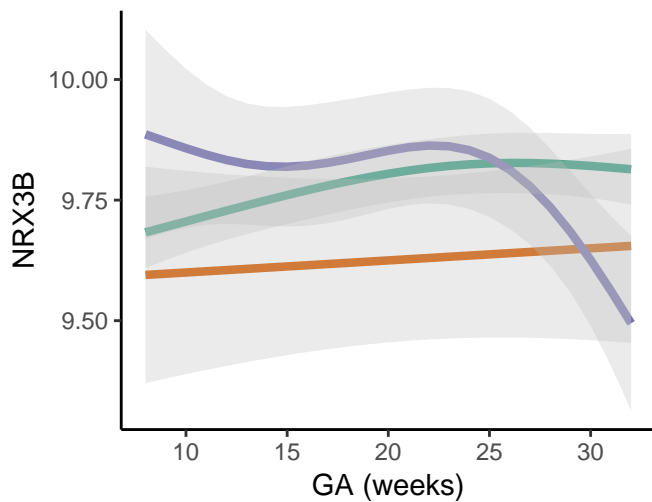

Group control MVM no MVM

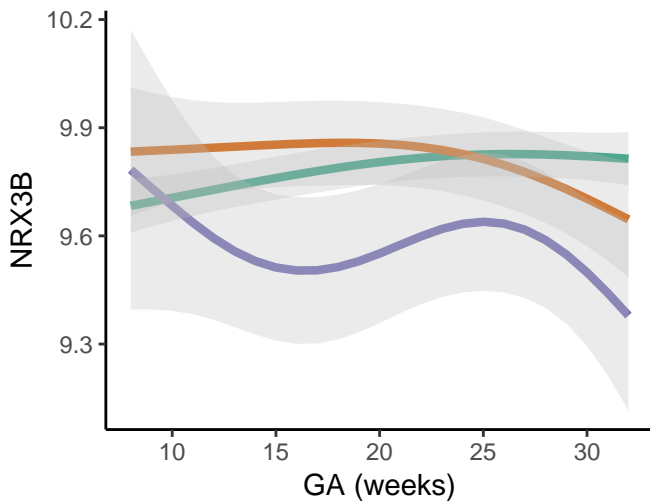

Group control PE

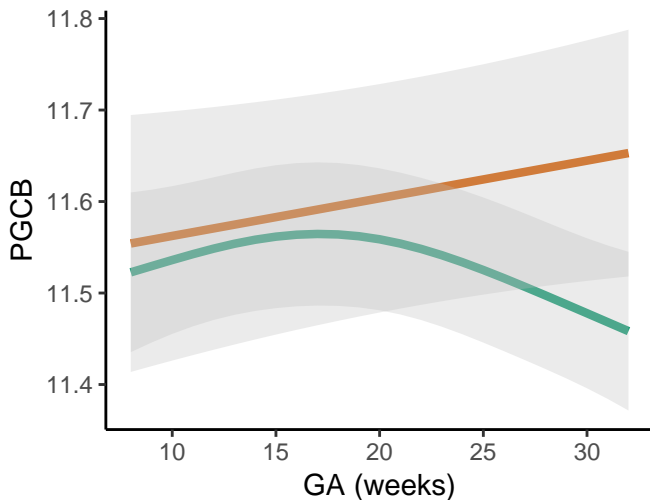

Group control mild PE severe PE

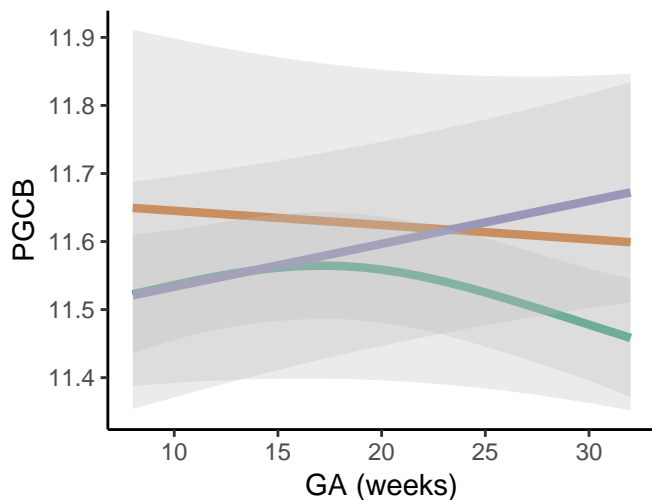

Group control MVM no MVM

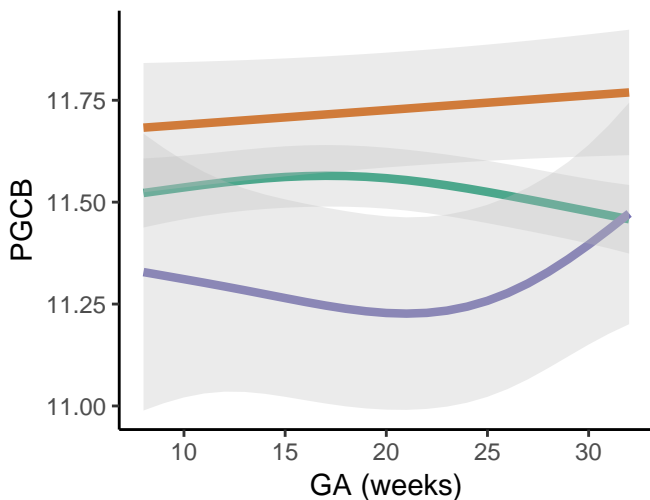

Group control PE

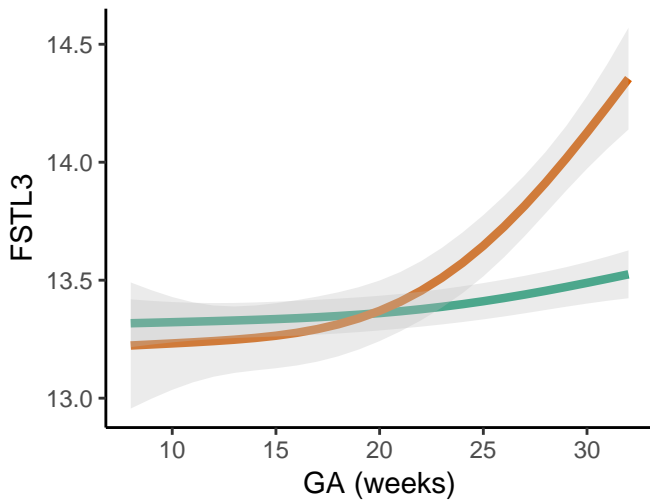

Group control mild PE severe PE

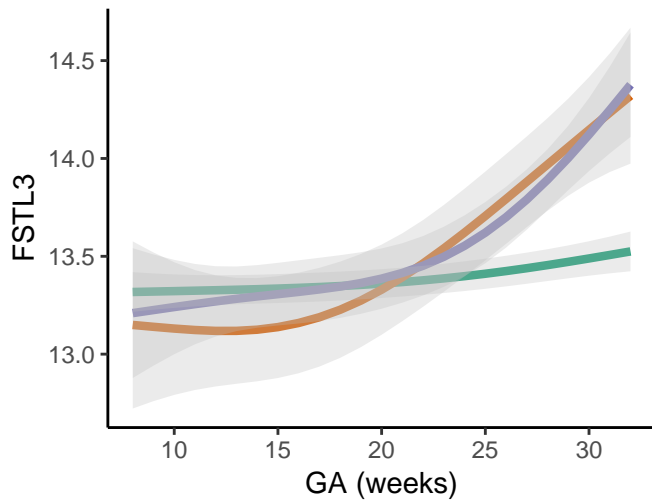

Group control MVM no MVM

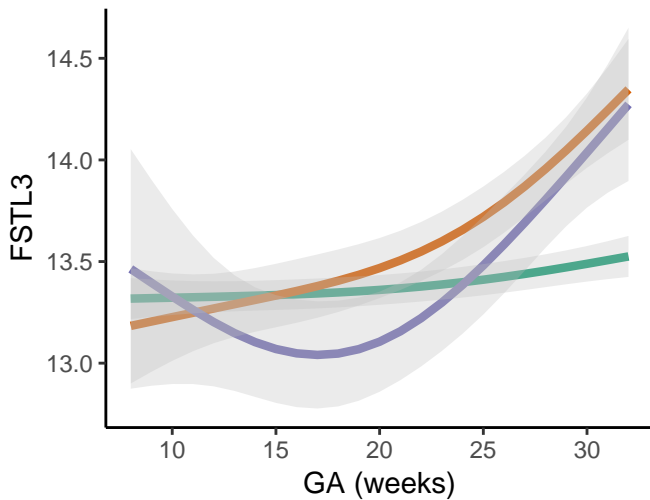

Group control PE

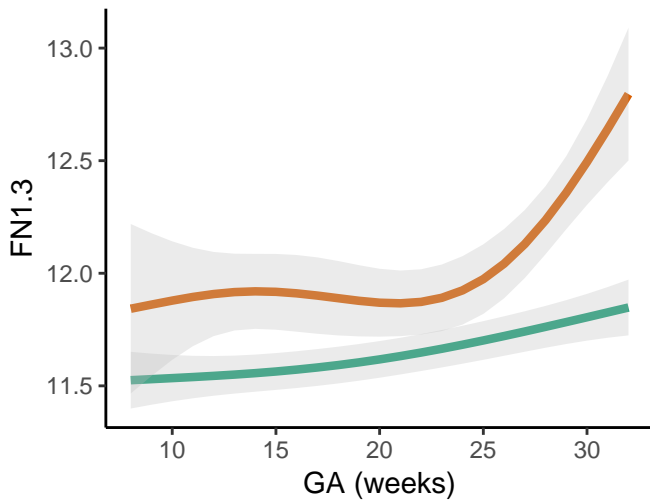

Group control mild PE severe PE

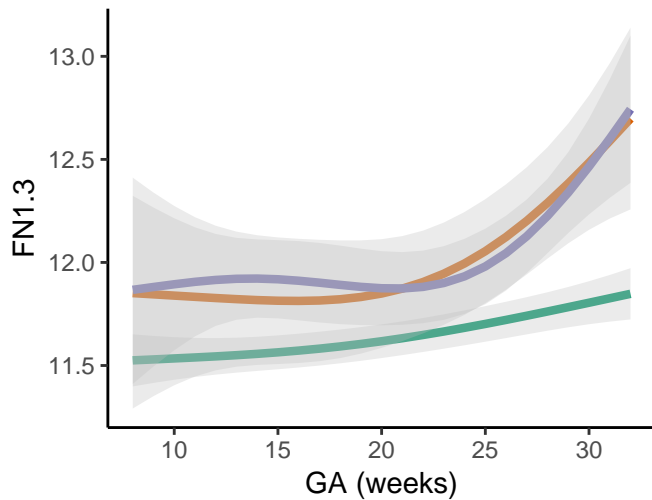

Group control MVM no MVM

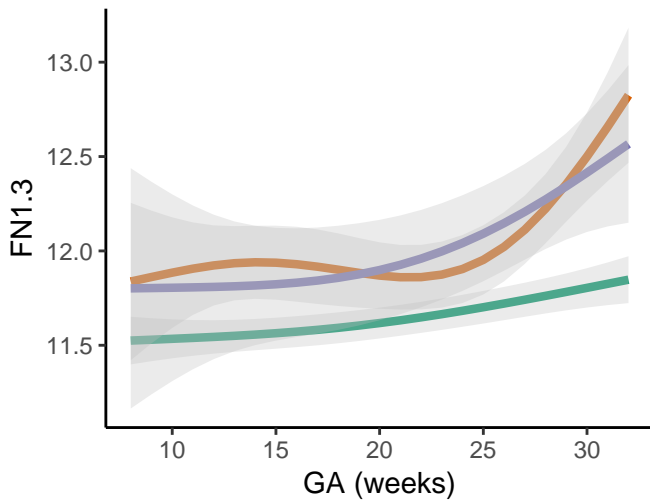

Group control PE

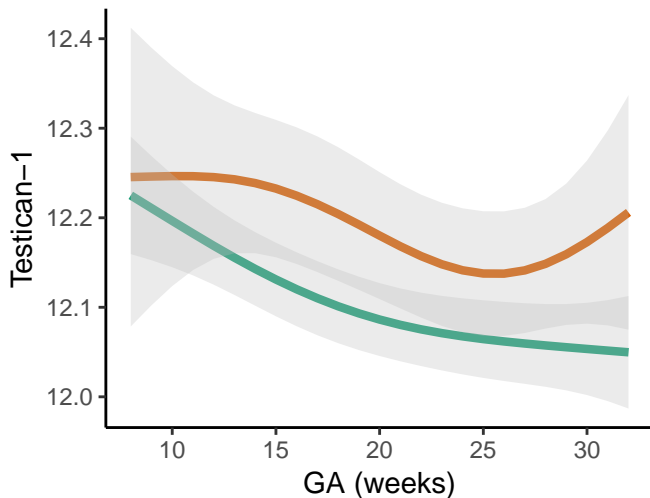

Group control mild PE severe PE

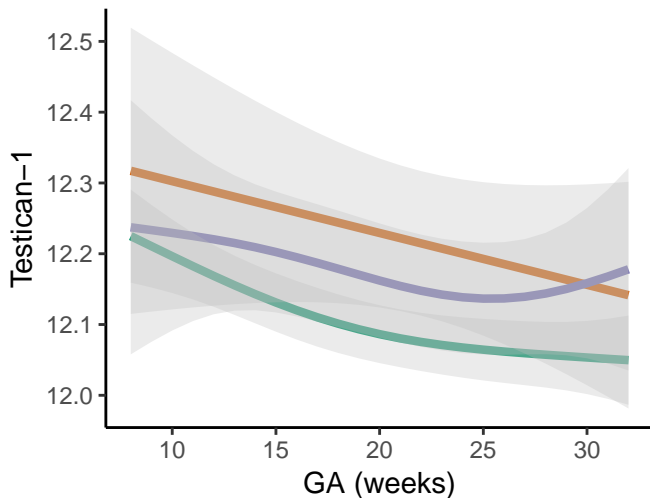

Group control MVM no MVM

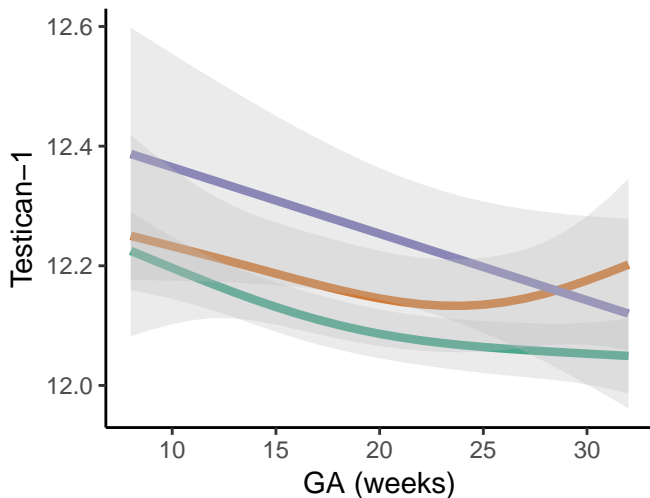

Group control PE

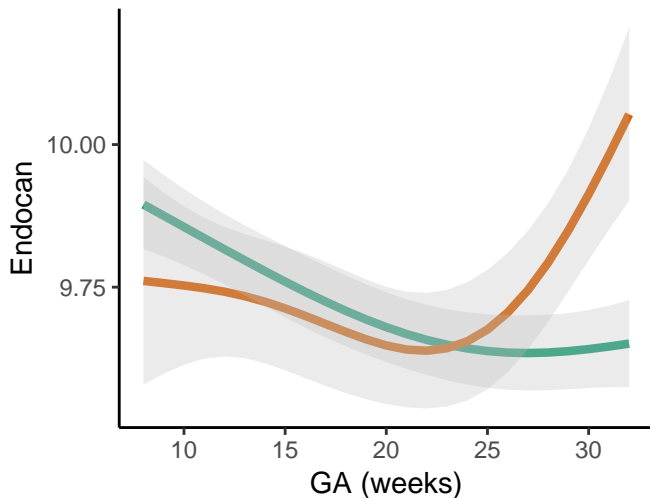

Group control mild PE severe PE

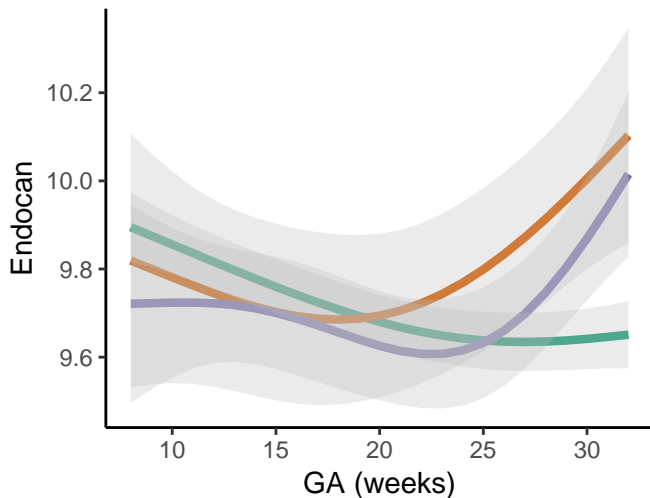

Group control MVM no MVM

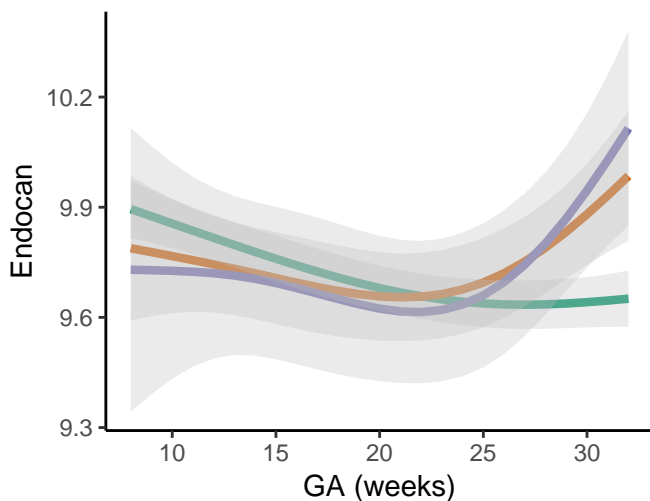



Group control PE

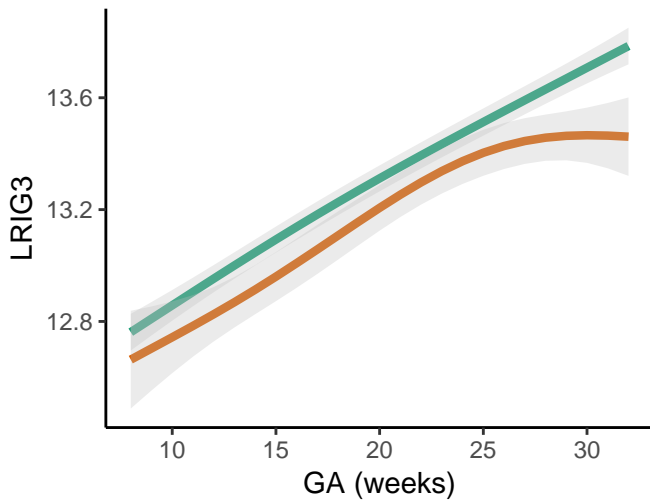

Group control mild PE severe PE

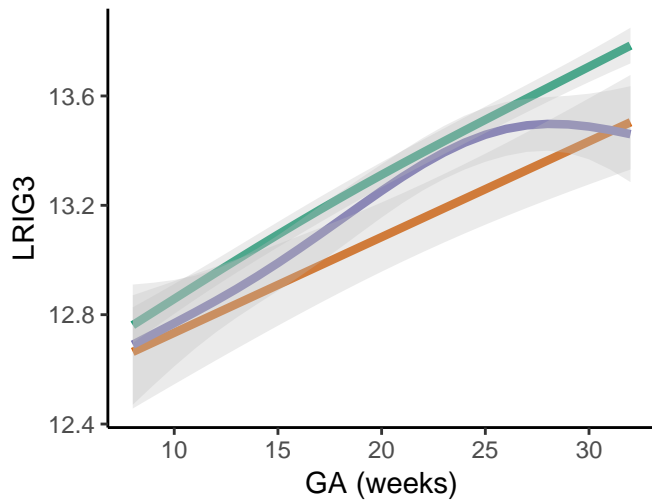

Group control MVM no MVM

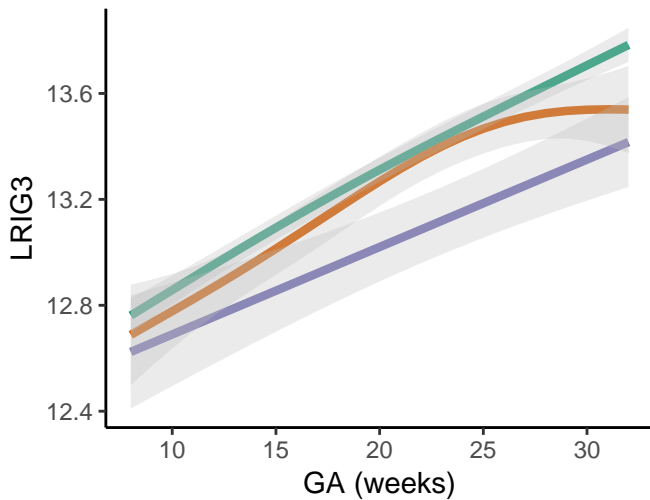

Group control PE

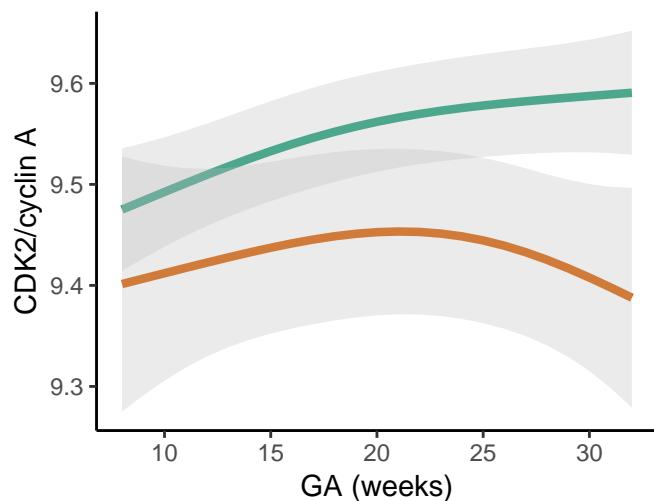

Group control mild PE severe PE

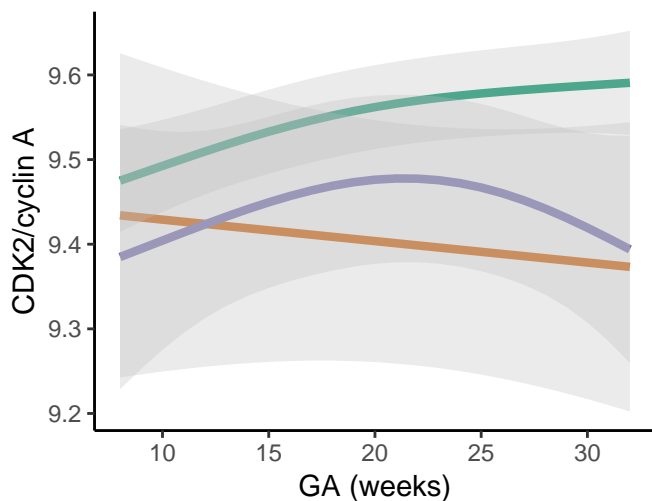

Group control MVM no MVM

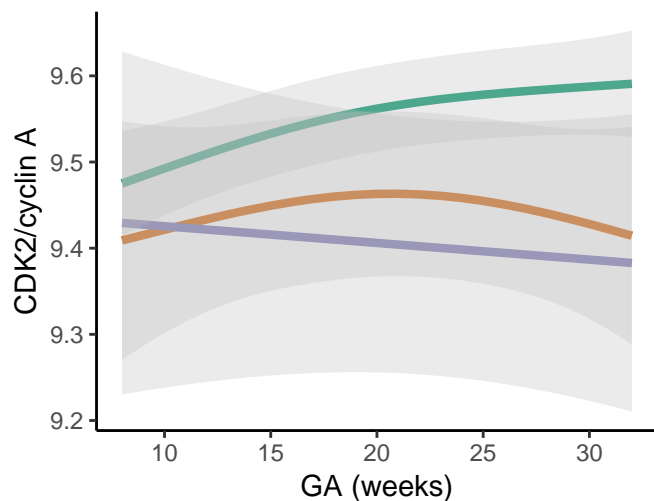

Group control PE

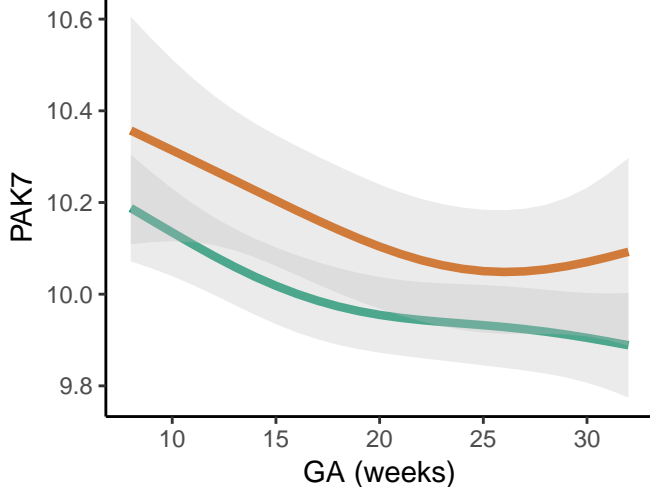

Group control mild PE severe PE

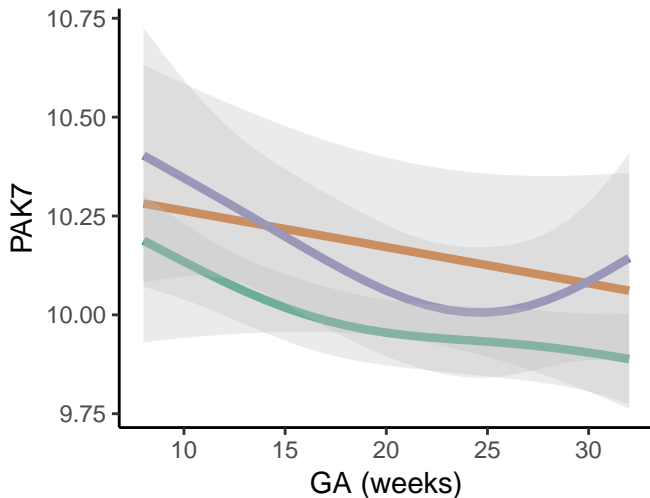

Group control MVM no MVM

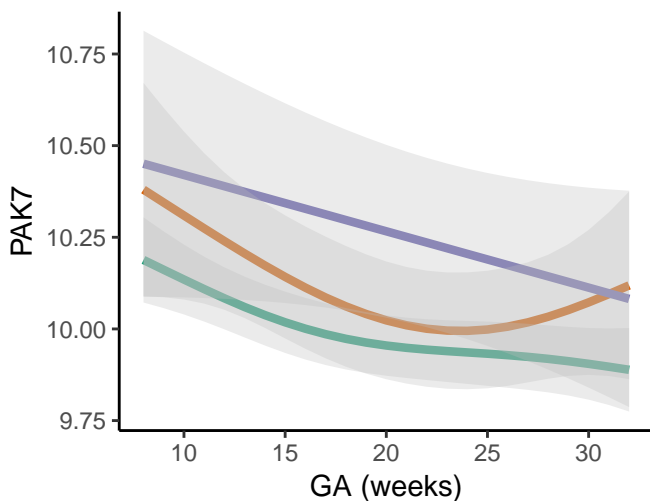

Group control PE

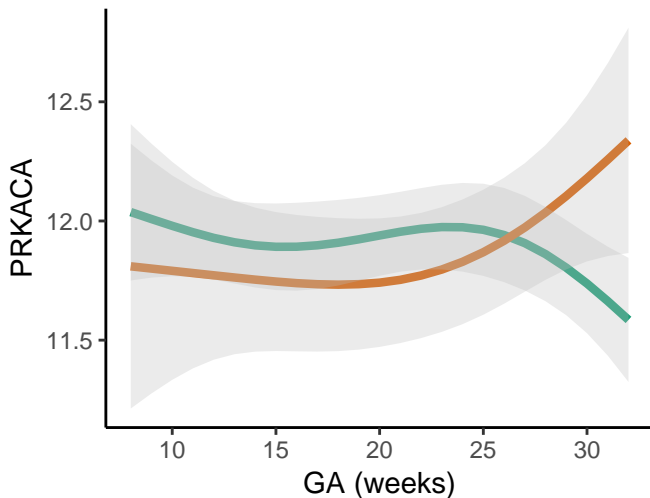

Group control mild PE severe PE

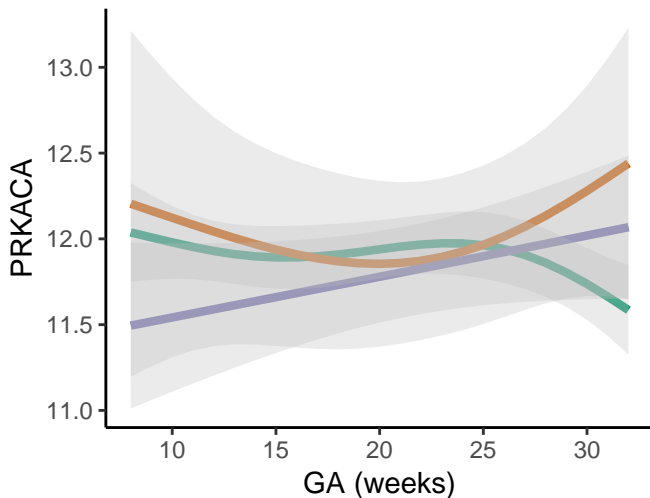

Group control MVM no MVM

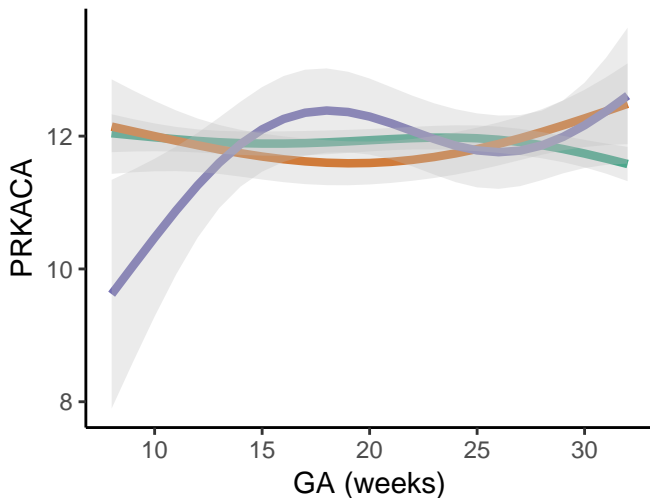

Group control PE

Group control mild PE severe PE

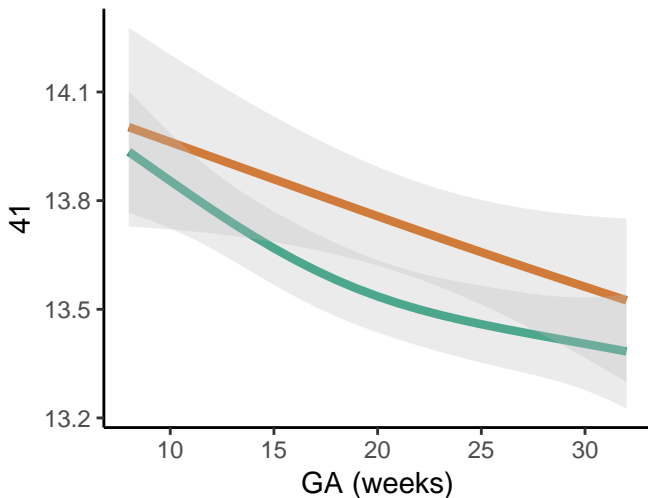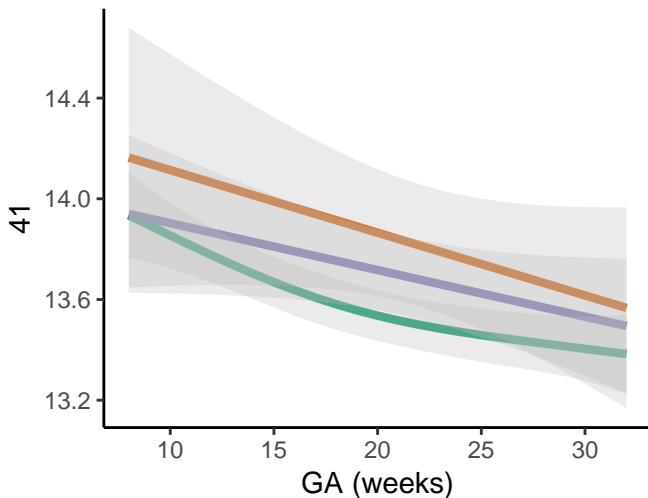

Group control MVM no MVM

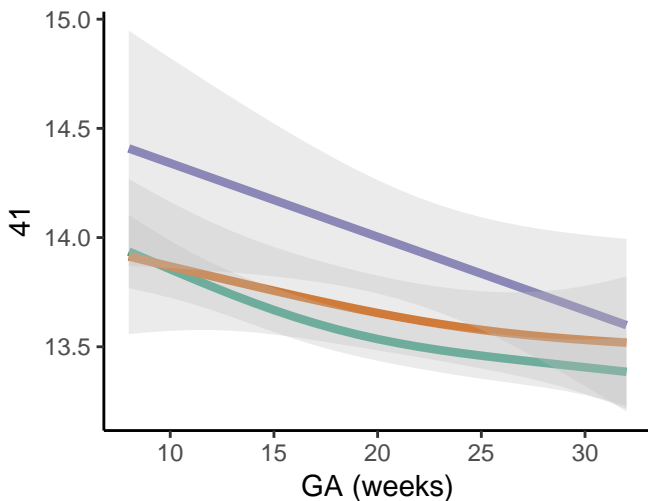

Group control PE

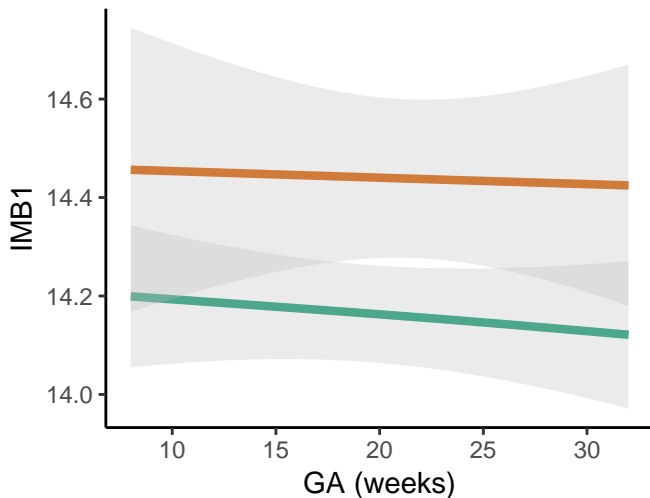

Group control mild PE severe PE

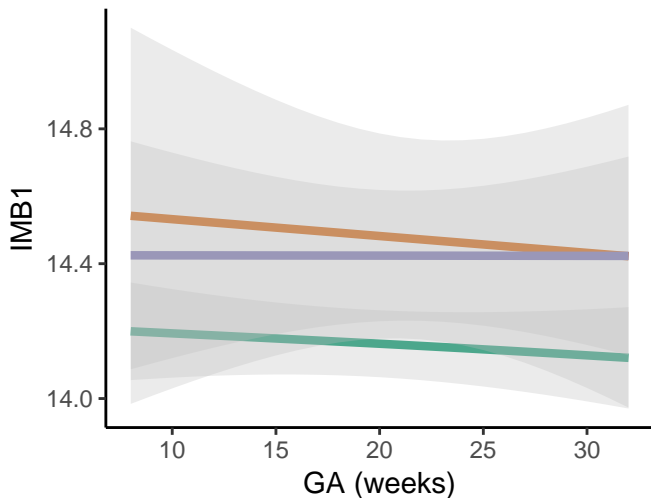

Group control MVM no MVM

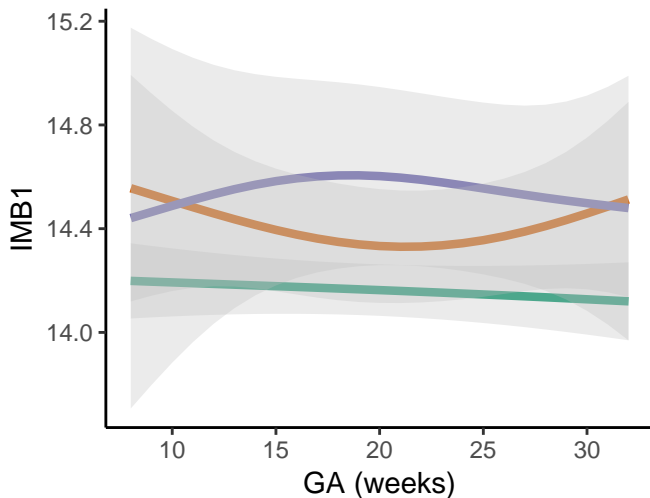

Group control PE

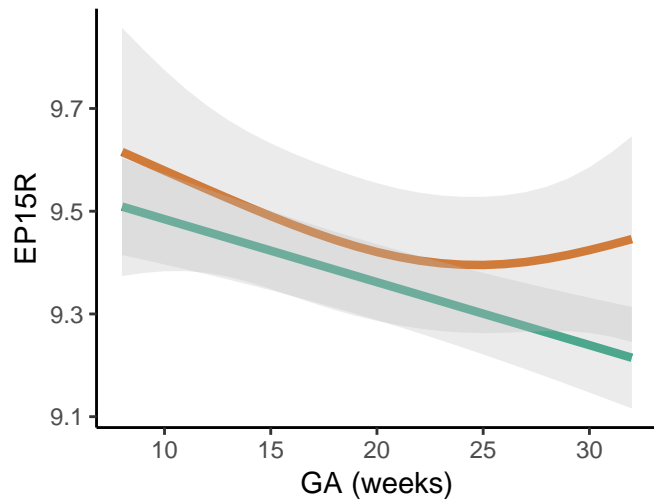

Group control mild PE severe PE

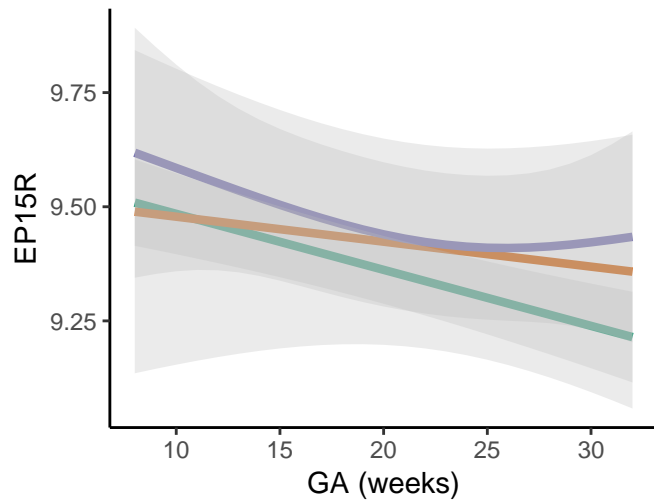

Group control MVM no MVM

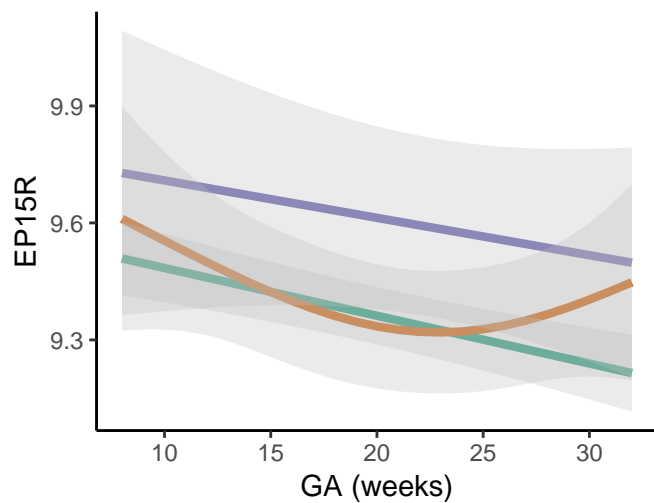

Group control PE

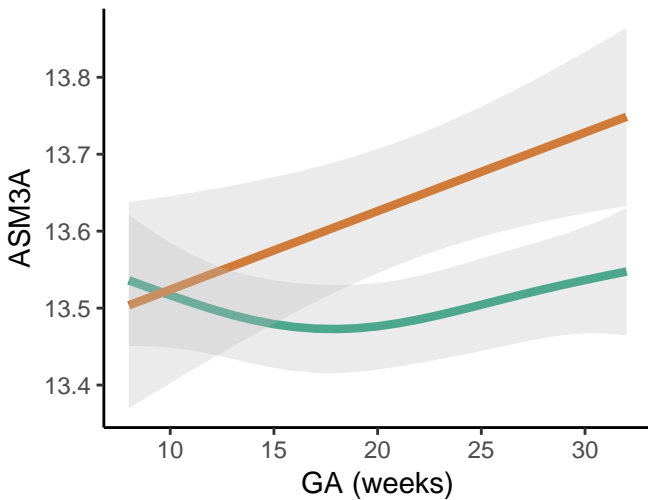

Group control mild PE severe PE

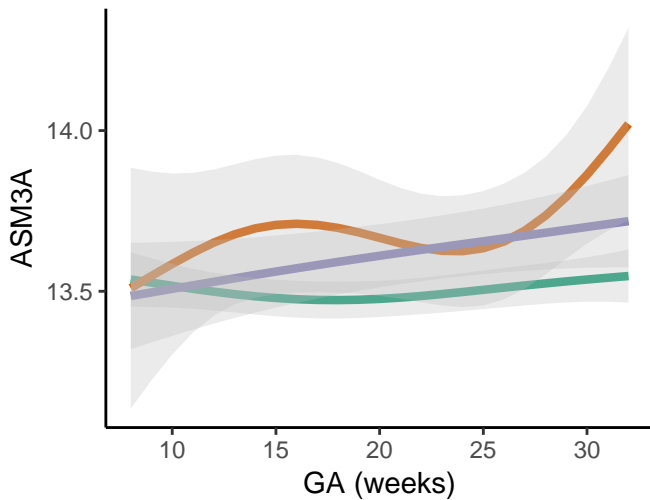

Group control MVM no MVM

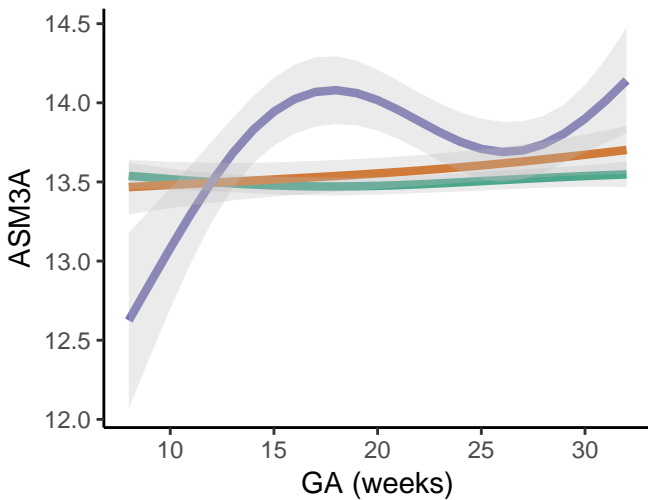



Group control PE

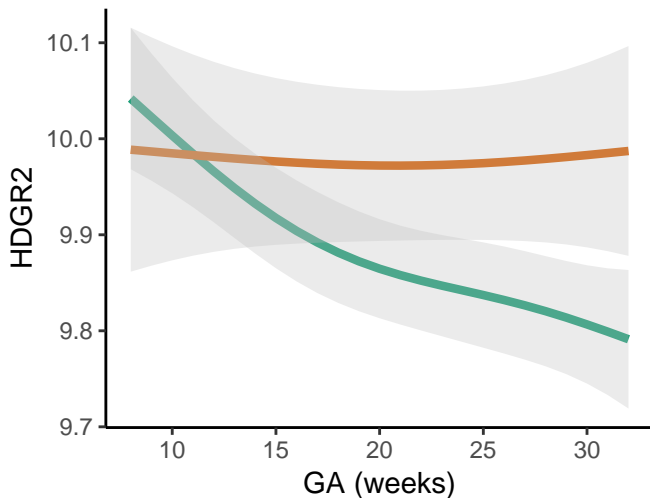

Group control mild PE severe PE

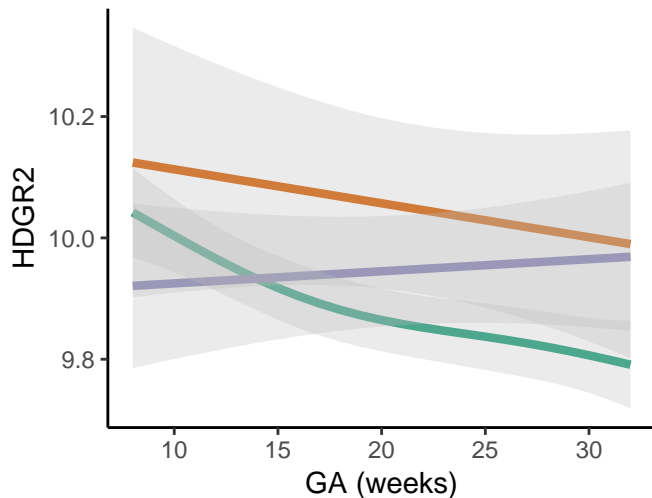

Group control MVM no MVM

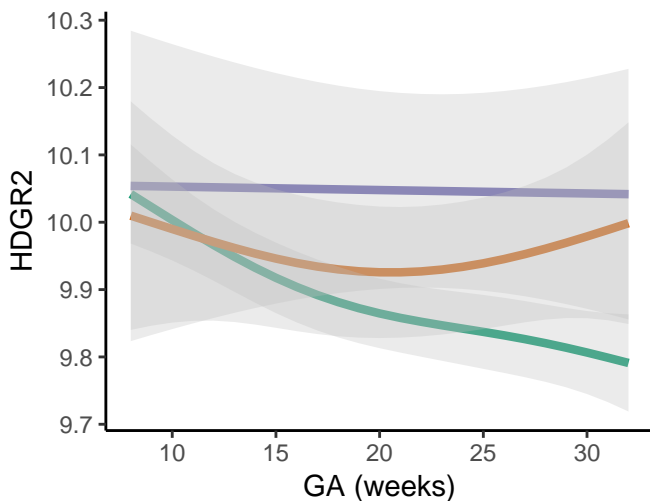

Group control PE

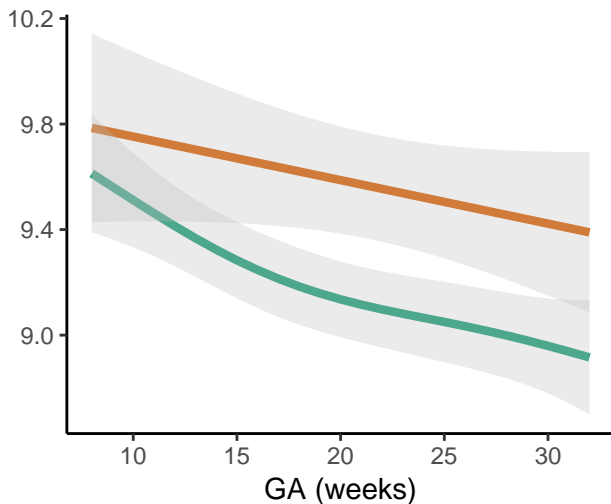

Group control mild PE severe PE

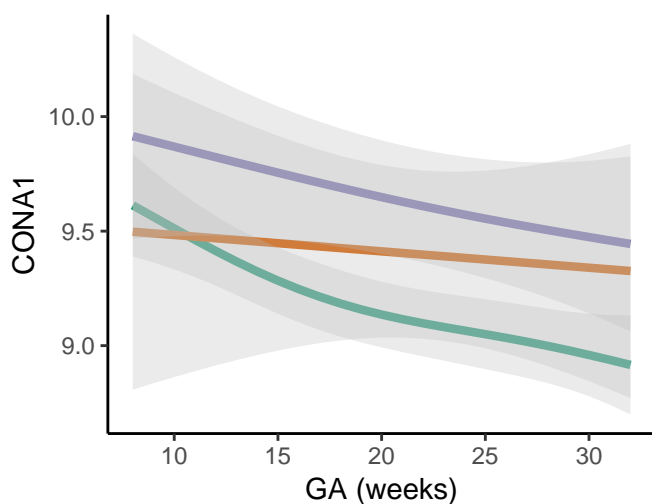

Group control MVM no MVM

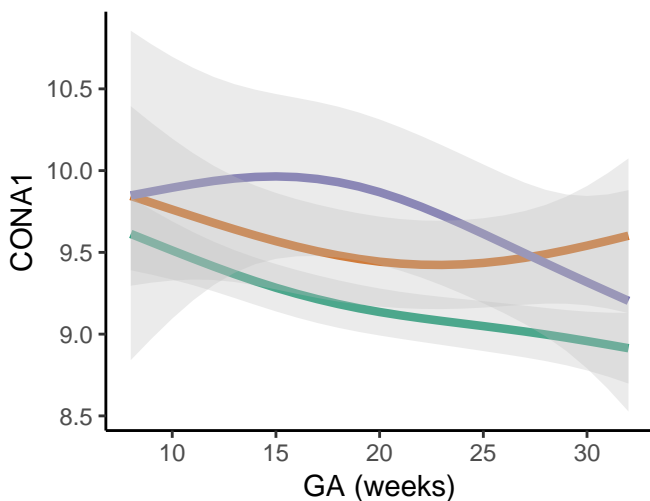

Group control PE

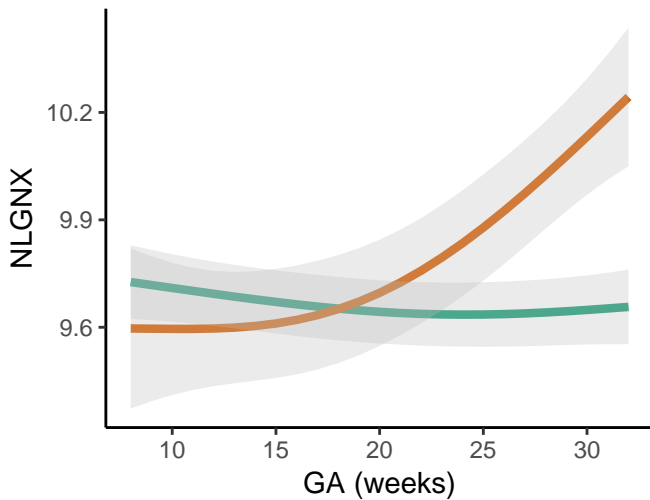

Group control mild PE severe PE

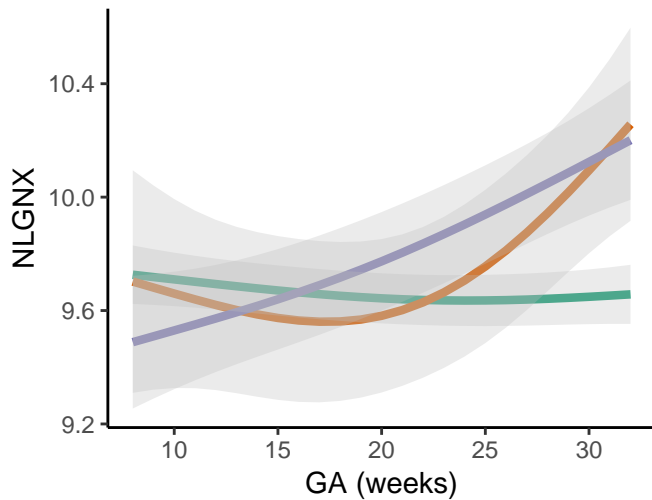

Group control MVM no MVM

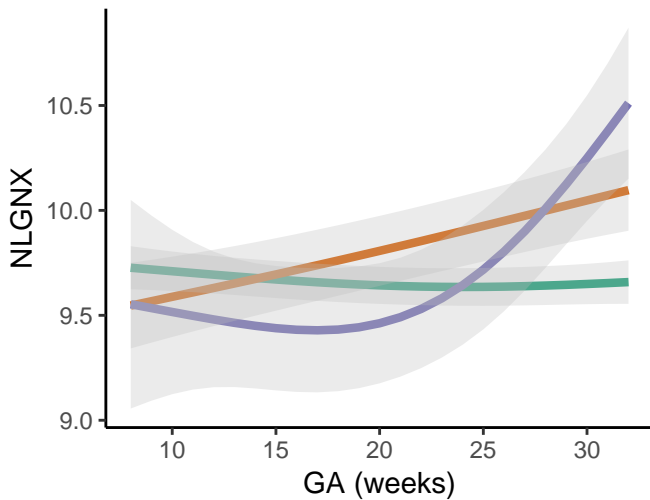

Group control PE

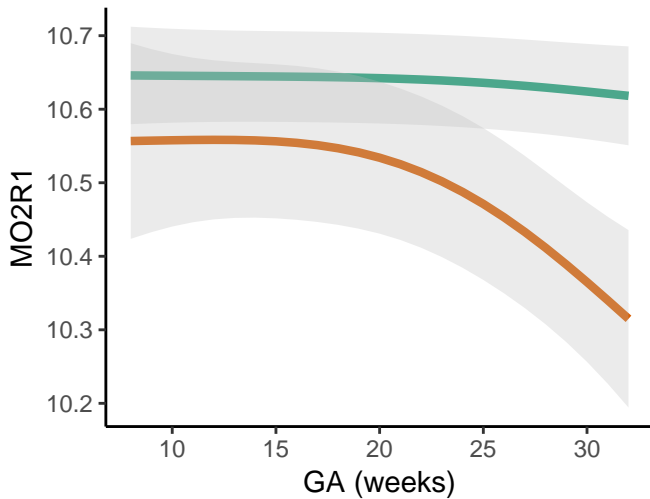

Group control mild PE severe PE

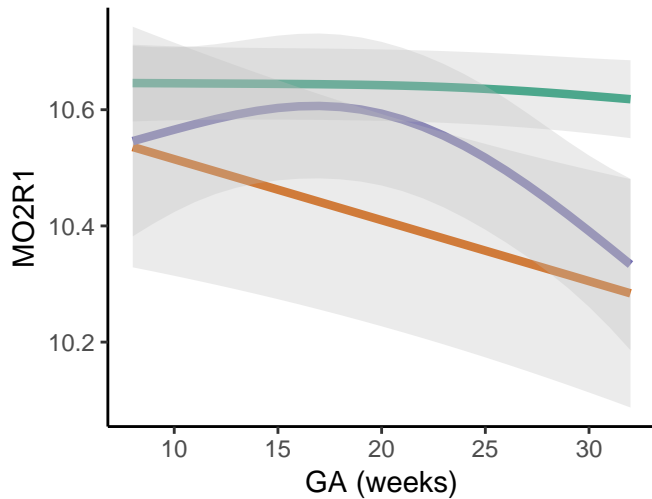

Group control MVM no MVM

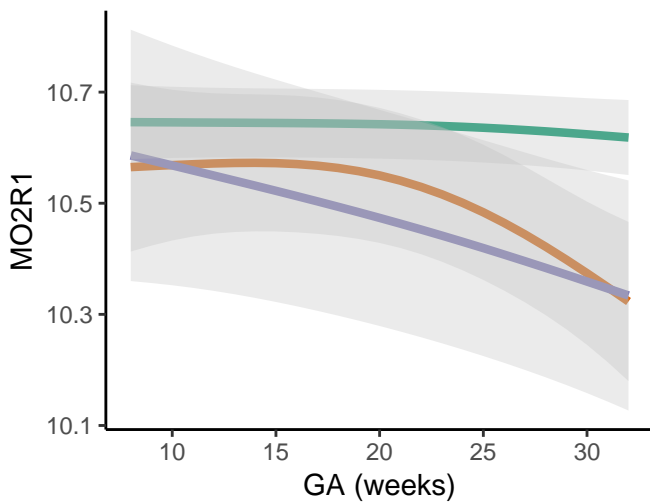

Group control PE

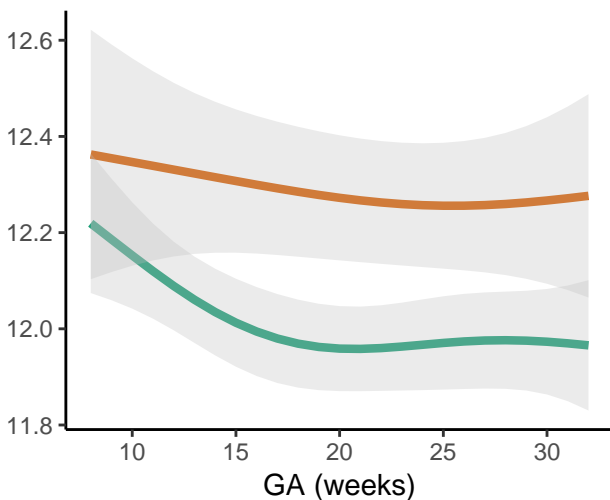

Group control mild PE severe PE

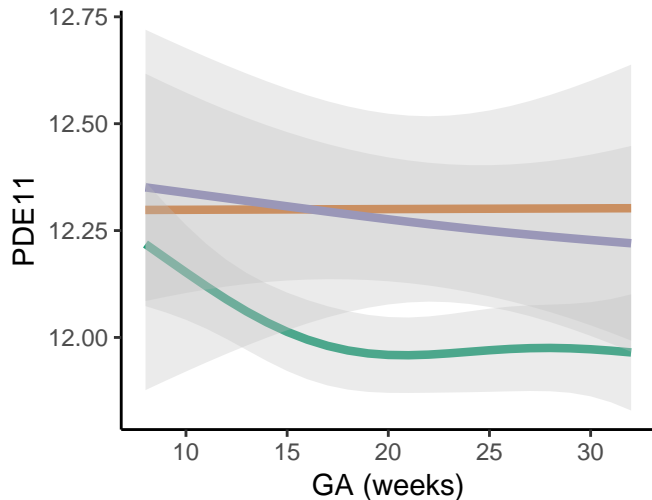

Group control MVM no MVM

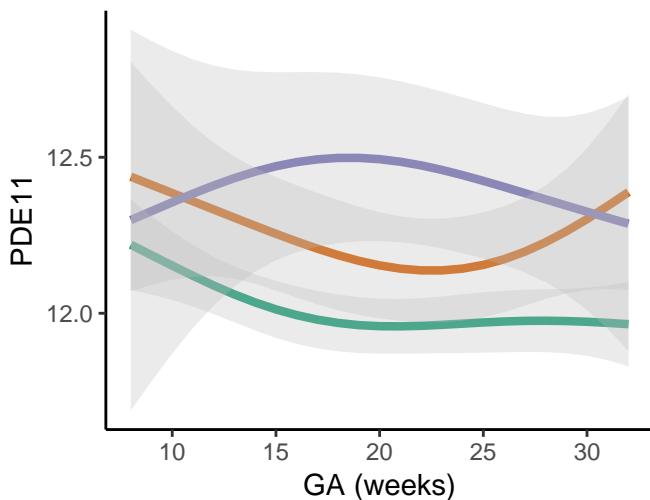

Group control PE

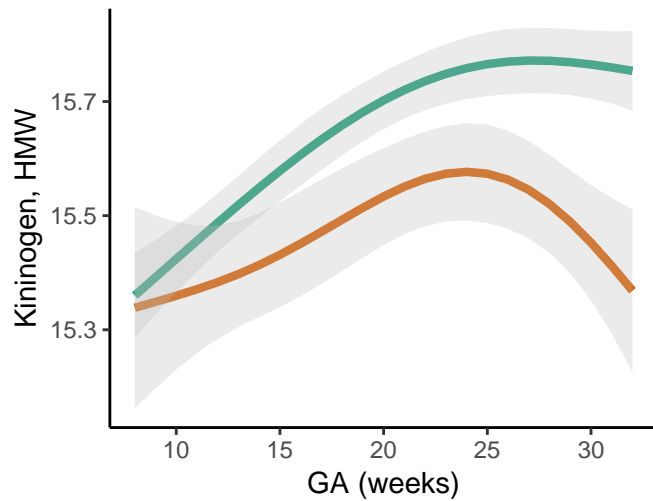

Group control mild PE severe PE

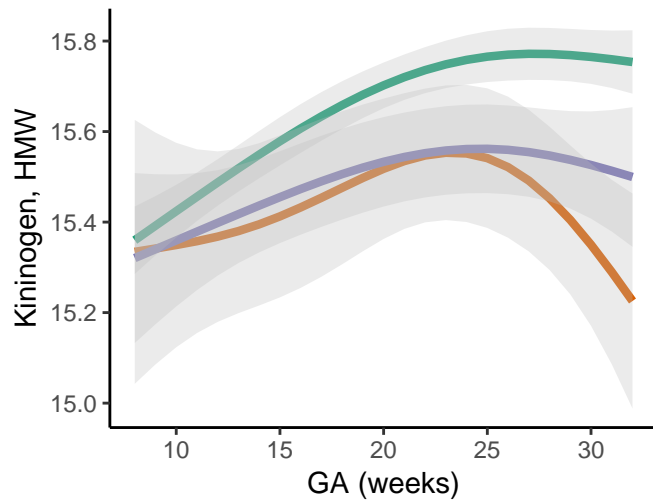

Group control MVM no MVM

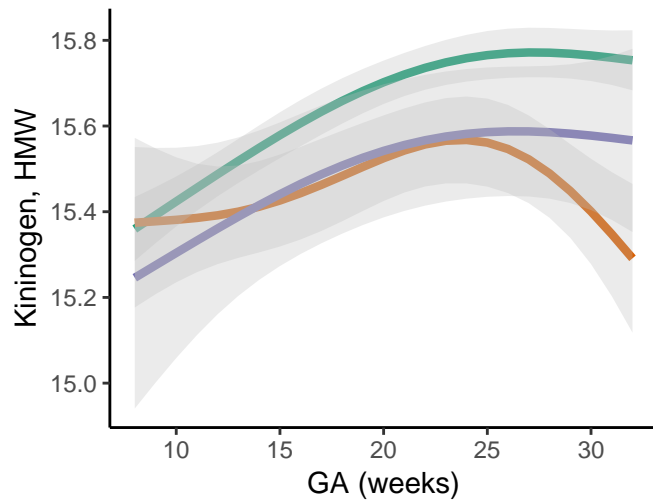

Group control PE

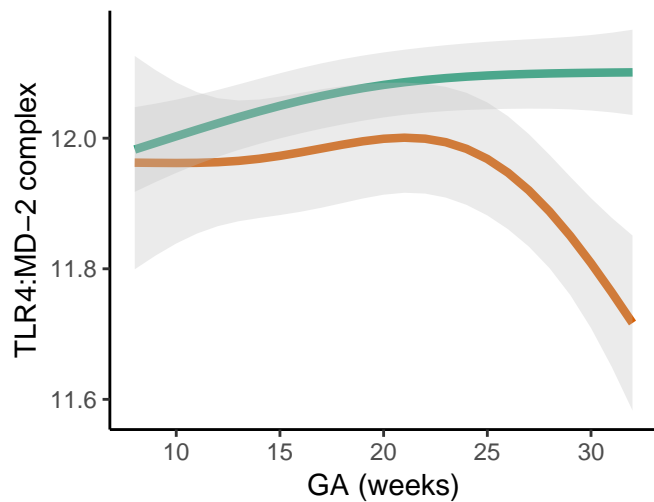

Group control mild PE severe PE

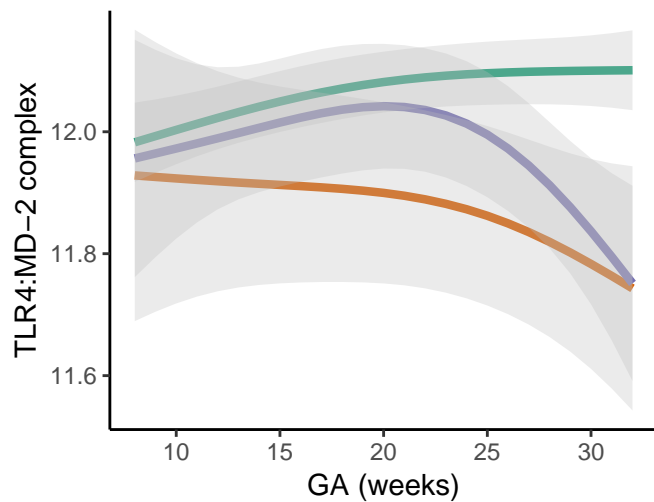

Group control MVM no MVM

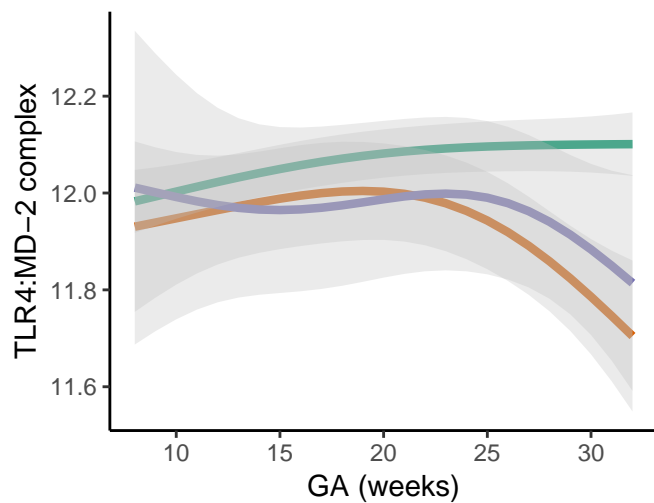

Supplement: pone.0217273.s006.pdf [file pone.0217273.s006.pdf]
