# Supplementary material for: The prediction of early preeclampsia: Results from a longitudinal proteomics study
Source: PLoS One. 2019 Jun 4;14(6):e0217273. doi: 10.1371/journal.pone.0217273 (PMC6548389; doi:10.1371/journal.pone.0217273)
Supplement: S2 Table — List of 175 proteins with significantly different abundance between early preeclampsia and normal pregnancy (q < 0.1) in at least one interval, after adjustment for body mass index, maternal age, parity and smoking status. FC: linear fold change, with negative values denoting lower levels while positive values denote higher levels in cases than in controls. (XLSX) [file pone.0217273.s002.xlsx]

## Sheet: EarlyPE_ALL
			8-16 (weeks)				16.1-22 (weeks)				22.1-28 (weeks)				28.1-32 (weeks)
SYMBOL	Name	FC	p	q	Sig.	FC	p	q	Sig.	FC	p	q	Sig.	FC	p	q	Sig.
gpIIbIIIa	Integrin alpha-IIb: beta-3 complex	1.9	0	0.003	Yes	1.977	0	0	Yes	1.355	0.0285	0.411	No	2.115	0	0	Yes
MMP-7	Matrilysin	1.328	0	0	Yes	1.456	0	0	Yes	1.26	0.0063	0.188	No	1.278	0.0198	0.13	No
MMP-12	Macrophage metalloelastase	-1.197	0.0105	0.406	No	-1.271	0	0.001	Yes	-1.246	0.0003	0.027	Yes	-1.258	0.0006	0.01	Yes
Activin A	Inhibin beta A chain	-1.014	0.8499	0.973	No	1.248	0.0003	0.016	Yes	1.736	0	0	Yes	2.413	0	0	Yes
PlGF	Placenta growth factor	-1.112	0.1339	0.654	No	-1.305	0.0002	0.014	Yes	-2.002	0	0	Yes	-2.345	0	0	Yes
VEGF121	Vascular endothelial growth factor A, isoform 121	-1.143	0.0351	0.438	No	-1.225	0.0003	0.016	Yes	-1.548	0	0	Yes	-1.916	0	0	Yes
IL-1 R4	Interleukin-1 receptor-like 1	1.026	0.6673	0.939	No	1.253	0.0002	0.014	Yes	1.261	0	0.004	Yes	1.394	0	0.001	Yes
Siglec-6	Sialic acid-binding Ig-like lectin 6	-1.04	0.7245	0.959	No	1.458	0	0.001	Yes	3.281	0	0	Yes	4.613	0	0	Yes
FCN2	Ficolin-2	-1.118	0.0039	0.303	No	-1.118	0.0027	0.081	Yes	-1.23	0	0.001	Yes	-1.411	0	0	Yes
Factor B	Complement factor B	-1.051	0.0169	0.406	No	-1.077	0.0004	0.016	Yes	-1.064	0.0195	0.369	No	-1.14	0	0.002	Yes
RBP	Retinol-binding protein 4	1.052	0.0815	0.567	No	1.102	0.0003	0.016	Yes	1.063	0.0371	0.469	No	1.149	0.0003	0.006	Yes
TIMP-2	Metalloproteinase inhibitor 2	1.039	0.1476	0.654	No	1.103	0.0012	0.044	Yes	1.041	0.2794	0.898	No	1.149	0.0008	0.013	Yes
kallikrein 14	Kallikrein-14	1.017	0.5041	0.883	No	1.11	0.0003	0.016	Yes	1.034	0.2261	0.877	No	1.108	0.0002	0.004	Yes
CD27	CD27 antigen	-1.008	0.7871	0.967	No	1.122	0.0006	0.026	Yes	1.005	0.8703	0.99	No	1.117	0.0121	0.094	Yes
Calcineurin B a	Calcineurin subunit B type 1	1.031	0.2931	0.769	No	1.13	0	0.005	Yes	1.021	0.4574	0.943	No	1.107	0.0016	0.023	Yes
OBCAM	Opioid-binding protein/cell adhesion molecule	1.031	0.1963	0.688	No	1.114	0	0.002	Yes	1.018	0.4309	0.941	No	1.076	0.0083	0.076	Yes
cGMP-stimulated PDE	cGMP-dependent 3',5'-cyclic phosphodiesterase	1.038	0.1469	0.654	No	1.117	0.0001	0.006	Yes	1.023	0.4081	0.931	No	1.121	0.0002	0.005	Yes
BASI	Basigin	1.017	0.5181	0.89	No	1.114	0.0003	0.016	Yes	1.026	0.3718	0.931	No	1.153	0.0007	0.012	Yes
Soggy-1	Dickkopf-like protein 1	1.048	0.2214	0.723	No	1.185	0	0.001	Yes	1.018	0.5947	0.963	No	1.109	0.0093	0.081	Yes
IMDH2	Inosine-5'-monophosphate dehydrogenase 2	1.072	0.003	0.303	No	1.096	0	0.004	Yes	1.018	0.4865	0.943	No	1.101	0.0017	0.023	Yes
ETHE1	Persulfide dioxygenase ETHE1, mitochondrial	-1.047	0.2835	0.757	No	-1.133	0.0015	0.051	Yes	-1.078	0.0936	0.72	No	-1.266	0	0.001	Yes
Apo A-I	Apolipoprotein A-I	1.015	0.5379	0.897	No	1.077	0.002	0.068	Yes	1.019	0.531	0.944	No	1.002	0.9448	0.971	No
Cytochrome P450 3A4	Cytochrome P450 3A4	-1.032	0.4197	0.861	No	-1.133	0.0011	0.041	Yes	-1.095	0.048	0.538	No	-1.064	0.1639	0.409	No
Thrombin	Thrombin	1.077	0.5928	0.92	No	1.658	0.0009	0.036	Yes	1.174	0.389	0.931	No	1.431	0.1063	0.321	No
Glutamate carboxypeptidase	Cytosolic non-specific dipeptidase	1.1	0.006	0.319	No	1.117	0.0004	0.016	Yes	1.052	0.2334	0.88	No	1.087	0.1469	0.386	No
Integrin aVb5	Integrin alpha-V: beta-5 complex	-1.113	0.0193	0.406	No	-1.148	0.0006	0.027	Yes	-1.056	0.3005	0.918	No	-1.005	0.9404	0.971	No
HMG-1	High mobility group protein B1	1.141	0.0214	0.406	No	1.148	0.0022	0.07	Yes	1.105	0.1319	0.779	No	-1.037	0.6431	0.825	No
Glutathione S-transferase Pi	Glutathione S-transferase P	-1.124	0.0019	0.303	No	-1.145	0.0003	0.016	Yes	-1.133	0.0081	0.202	No	-1.035	0.5656	0.781	No
BMP-1	Bone morphogenetic protein 1	1.146	0.0013	0.262	No	1.176	0	0.001	Yes	1.034	0.522	0.944	No	-1.016	0.8105	0.906	No
STX1a	Syntaxin-1A	1.051	0.1512	0.659	No	1.148	0	0.002	Yes	1.035	0.3599	0.931	No	1.036	0.3228	0.582	No
WISP-1	WNT1-inducible-signaling pathway protein 1	1.062	0.1903	0.681	No	1.142	0.0003	0.016	Yes	1.025	0.5896	0.959	No	1.1	0.1057	0.32	No
Cadherin-6	Cadherin-6	1.048	0.1448	0.654	No	1.126	0.0002	0.014	Yes	1.014	0.6813	0.964	No	1.102	0.0204	0.132	No
RAN	GTP-binding nuclear protein Ran	1.318	0.0147	0.406	No	1.402	0.0023	0.07	Yes	1.265	0.1536	0.798	No	1.043	0.8229	0.914	No
PPID	Peptidyl-prolyl cis-trans isomerase D	1.463	0.0029	0.303	No	1.556	0.001	0.039	Yes	1.281	0.1482	0.779	No	1.019	0.9312	0.968	No
CDK8/cyclin C	Cyclin-dependent kinase 8:Cyclin-C complex	1.142	0.0014	0.262	No	1.171	0.0001	0.006	Yes	1.109	0.0645	0.628	No	1.074	0.2076	0.475	No
TPSB2	Tryptase beta-2	-1.211	0.0193	0.406	No	-1.286	0.0014	0.049	Yes	-1.126	0.1736	0.801	No	-1.302	0.0228	0.141	No
DRAK2	Serine/threonine-protein kinase 17B	1.033	0.2473	0.734	No	1.099	0.0002	0.014	Yes	1.007	0.811	0.985	No	-1.02	0.4866	0.721	No
Nidogen	Nidogen-1	1.024	0.4184	0.861	No	1.069	0.0382	0.378	No	1.169	0.0001	0.012	Yes	1.277	0	0.002	Yes
sTie-1	Tyrosine-protein kinase receptor Tie-1, soluble	-1.027	0.4552	0.874	No	-1.047	0.2111	0.717	No	-1.155	0.0016	0.093	Yes	-1.387	0	0	Yes
LBP	Lipopolysaccharide-binding protein	-1.116	0.0696	0.547	No	-1.075	0.1604	0.663	No	-1.209	0.001	0.077	Yes	-1.372	0.0001	0.004	Yes
SDF-1	Stromal cell-derived factor 1	1.042	0.1606	0.659	No	1.013	0.6183	0.939	No	1.121	0.0011	0.078	Yes	1.122	0.0128	0.097	Yes
Stanniocalcin-1	Stanniocalcin-1	-1.069	0.2041	0.704	No	1.037	0.4918	0.876	No	1.338	0.0002	0.023	Yes	1.694	0	0.001	Yes
NID2	Nidogen-2	1.038	0.2939	0.769	No	1.053	0.1281	0.615	No	1.148	0.0007	0.057	Yes	1.282	0	0.002	Yes
OMD	Osteomodulin	-1.008	0.8637	0.981	No	1.043	0.3321	0.805	No	1.192	0.0001	0.016	Yes	1.436	0	0	Yes
XTP3A	dCTP pyrophosphatase 1	-1.037	0.4272	0.861	No	1.052	0.1131	0.595	No	1.144	0.0002	0.023	Yes	1.194	0.0005	0.01	Yes
Cadherin E	Cadherin-1	-1.009	0.7261	0.959	No	1.023	0.3278	0.803	No	1.086	0.0005	0.044	Yes	1.079	0.0184	0.123	No
Eotaxin	Eotaxin	1.074	0.128	0.654	No	1.06	0.1443	0.646	No	1.16	0.0013	0.083	Yes	1.131	0.037	0.186	No
Histone H2A.z	Histone H2A.z	-1.015	0.799	0.973	No	1.024	0.6487	0.945	No	1.311	0.0009	0.072	Yes	1.354	0.0376	0.186	No
annexin I	Annexin A1	1.048	0.375	0.823	No	1.03	0.5053	0.881	No	1.195	0.0013	0.083	Yes	1.125	0.1045	0.319	No
RAP	alpha-2-macroglobulin receptor-associated protein	1.01	0.8672	0.981	No	-1.023	0.6636	0.945	No	-1.181	0.0017	0.098	Yes	-1.095	0.1276	0.354	No
PAI-1	Plasminogen activator inhibitor 1	1.073	0.2665	0.745	No	1.027	0.5684	0.906	No	1.185	0.0036	0.163	No	1.388	0	0.001	Yes
vWF	von Willebrand factor	1.47	0.0009	0.262	No	1.292	0.0124	0.209	No	1.144	0.1735	0.801	No	1.824	0	0.001	Yes
tPA	Tissue-type plasminogen activator	1.023	0.4971	0.883	No	1.005	0.8789	0.991	No	1.105	0.049	0.54	No	1.287	0.0003	0.006	Yes
PSA	Prostate-specific antigen	1.01	0.7443	0.965	No	-1.027	0.2971	0.788	No	-1.046	0.0712	0.646	No	-1.138	0.0002	0.005	Yes
IL-6	Interleukin-6	1.121	0.0534	0.509	No	1.141	0.0179	0.262	No	1.053	0.3334	0.931	No	1.353	0	0.001	Yes
MMP-2	72 kDa type IV collagenase	1.002	0.9457	0.992	No	1.067	0.0325	0.348	No	1.105	0.0041	0.171	No	1.169	0.0015	0.022	Yes
Met	Hepatocyte growth factor receptor	-1.03	0.3707	0.822	No	-1.03	0.349	0.812	No	-1.048	0.1535	0.798	No	-1.164	0.001	0.016	Yes
a2-Antiplasmin	Alpha-2-antiplasmin	-1	0.9865	0.998	No	1.037	0.1441	0.646	No	-1.048	0.1344	0.779	No	-1.082	0.009	0.081	Yes
Angiostatin	Angiostatin	-1.019	0.3839	0.832	No	-1.033	0.1101	0.587	No	-1.03	0.2074	0.85	No	-1.096	0.01	0.085	Yes
Angiotensinogen	Angiotensinogen	-1.045	0.3061	0.781	No	1.009	0.7283	0.963	No	-1.074	0.0292	0.412	No	-1.154	0.0005	0.01	Yes
b2-Microglobulin	Beta-2-microglobulin	-1.007	0.8296	0.973	No	1.011	0.689	0.946	No	1.054	0.0859	0.704	No	1.125	0.0104	0.086	Yes
C1-Esterase Inhibitor	Plasma protease C1 inhibitor	-1.057	0.1653	0.659	No	-1.072	0.034	0.361	No	-1.071	0.0419	0.491	No	-1.203	0.0001	0.002	Yes
Coagulation Factor IX	Coagulation factor IX	-1.015	0.3637	0.822	No	1.018	0.2503	0.752	No	-1.054	0.0044	0.171	No	-1.091	0.0007	0.012	Yes
Fibronectin	Fibronectin	1.165	0.0054	0.303	No	1.097	0.0587	0.432	No	1.143	0.0055	0.188	No	1.52	0	0	Yes
Hemopexin	Hemopexin	-1.018	0.8502	0.973	No	-1.038	0.6382	0.945	No	-1.099	0.3703	0.931	No	-1.403	0.011	0.088	Yes
HSP 60	60 kDa heat shock protein, mitochondrial	1.247	0.0076	0.383	No	1.183	0.0235	0.295	No	1.029	0.7638	0.976	No	1.431	0.0002	0.005	Yes
LDH-H 1	L-lactate dehydrogenase B chain	1.06	0.2241	0.724	No	1.076	0.0615	0.436	No	-1.03	0.5091	0.944	No	1.156	0.0128	0.097	Yes
Lactoferrin	Lactotransferrin	-1.073	0.205	0.704	No	-1.102	0.0638	0.439	No	-1.105	0.0864	0.704	No	-1.287	0.0012	0.018	Yes
MMP-8	Neutrophil collagenase	1.068	0.2375	0.728	No	1.022	0.6735	0.945	No	1.068	0.2774	0.898	No	1.23	0.0028	0.034	Yes
NADPH-P450 Oxidoreductase	NADPH--cytochrome P450 reductase	1.024	0.7531	0.965	No	1.177	0.0458	0.41	No	1.141	0.0917	0.72	No	1.293	0.011	0.088	Yes
OSM	Oncostatin-M	1.002	0.9392	0.99	No	1.006	0.8136	0.986	No	-1.006	0.8043	0.985	No	-1.082	0.0036	0.041	Yes
PDGF-BB	Platelet-derived growth factor subunit B	1.158	0.0251	0.406	No	1.11	0.1454	0.646	No	1.14	0.1922	0.829	No	1.354	0.0038	0.043	Yes
PHI	Glucose-6-phosphate isomerase	1.008	0.8505	0.973	No	1.044	0.2519	0.752	No	1.014	0.7574	0.974	No	1.156	0.0051	0.055	Yes
Prekallikrein	Plasma kallikrein	-1.028	0.312	0.786	No	-1.057	0.017	0.254	No	-1.05	0.1233	0.779	No	-1.116	0.0064	0.066	Yes
PKC-Z	Protein kinase C zeta type	1.015	0.6913	0.943	No	-1.002	0.959	0.992	No	1.064	0.1425	0.779	No	1.18	0.0134	0.099	Yes
TGF-b1	Transforming growth factor beta-1	1.058	0.0813	0.567	No	1.018	0.5477	0.894	No	1.036	0.3867	0.931	No	1.143	0.0126	0.096	Yes
Coagulation Factor V	Coagulation Factor V	1.104	0.1237	0.654	No	1.057	0.2561	0.752	No	1.133	0.0359	0.46	No	1.229	0.0038	0.043	Yes
STRATIFIN	14-3-3 protein sigma	1.032	0.4989	0.883	No	1.021	0.6191	0.939	No	-1.005	0.9077	0.99	No	1.128	0.013	0.097	Yes
Cystatin C	Cystatin-C	1.025	0.434	0.861	No	1.044	0.0955	0.534	No	1.061	0.0801	0.687	No	1.171	0.0012	0.018	Yes
Mn SOD	Superoxide dismutase [Mn], mitochondrial	-1.043	0.2467	0.734	No	-1.028	0.3931	0.841	No	-1.011	0.7172	0.969	No	-1.166	0.0002	0.005	Yes
Angiopoietin-1	Angiopoietin-1	1.175	0.0107	0.406	No	1.103	0.06	0.436	No	1.167	0.0578	0.581	No	1.329	0.0028	0.034	Yes
Angiopoietin-2	Angiopoietin-2	1.014	0.8356	0.973	No	-1.044	0.5091	0.885	No	-1.083	0.3865	0.931	No	-1.502	0.0026	0.032	Yes
TFPI	Tissue factor pathway inhibitor	1.014	0.6003	0.92	No	1.011	0.6653	0.945	No	1.088	0.0073	0.197	No	1.125	0.0036	0.041	Yes
IFN-aA	Interferon alpha-2	-1.045	0.2716	0.745	No	-1.039	0.274	0.769	No	-1.03	0.295	0.918	No	-1.142	0.005	0.054	Yes
Alkaline phosphatase, bone	Alkaline phosphatase, tissue-nonspecific isozyme	-1.052	0.2527	0.742	No	-1.071	0.0883	0.525	No	-1.088	0.0658	0.633	No	-1.267	0.0001	0.004	Yes
Cadherin-5	Cadherin-5	-1.014	0.6617	0.939	No	-1.015	0.6158	0.937	No	-1.05	0.1438	0.779	No	-1.125	0.0032	0.038	Yes
Ficolin-3	Ficolin-3	-1.05	0.38	0.827	No	-1.048	0.323	0.803	No	-1.094	0.1466	0.779	No	-1.455	0	0	Yes
IL-18 BPa	Interleukin-18-binding protein	-1.033	0.5651	0.912	No	1.035	0.4497	0.857	No	1.001	0.979	0.991	No	-1.183	0.0031	0.037	Yes
sRANKL	Tumor necrosis factor ligand superfamily member 11	-1.074	0.1149	0.642	No	-1.031	0.4111	0.845	No	-1.05	0.2472	0.886	No	-1.141	0.0086	0.079	Yes
Midkine	Midkine	1.018	0.6695	0.939	No	-1.007	0.8657	0.991	No	1.156	0.0038	0.163	No	1.178	0.0048	0.053	Yes
Coagulation Factor XI	Coagulation Factor XI	-1.064	0.1043	0.61	No	-1.041	0.2545	0.752	No	-1.124	0.0031	0.154	No	-1.124	0.0102	0.085	Yes
Thrombospondin-1	Thrombospondin-1	1.167	0.0324	0.414	No	1.058	0.3675	0.818	No	1.152	0.1274	0.779	No	1.358	0.0034	0.04	Yes
TIMP-3	Metalloproteinase inhibitor 3	1.131	0.1535	0.659	No	1.048	0.5238	0.888	No	1.215	0.0473	0.537	No	1.562	0.0001	0.004	Yes
bFGF-R	Fibroblast growth factor receptor 1	-1.008	0.7603	0.965	No	-1.007	0.7711	0.97	No	-1.001	0.9608	0.99	No	-1.101	0.0042	0.047	Yes
ALCAM	CD166 antigen	-1.046	0.1144	0.642	No	-1.036	0.0886	0.525	No	-1.067	0.027	0.41	No	-1.239	0	0	Yes
IP-10	C-X-C motif chemokine 10	-1.04	0.5035	0.883	No	1.089	0.1377	0.638	No	1.162	0.0056	0.188	No	1.332	0.0003	0.007	Yes
NAP-2	Neutrophil-activating peptide 2	1.117	0.1279	0.654	No	1.008	0.9021	0.991	No	1.081	0.4096	0.931	No	1.287	0.01	0.085	Yes
VEGF sR2	Vascular endothelial growth factor receptor 2	-1.015	0.5997	0.92	No	-1.003	0.9263	0.991	No	-1.082	0.021	0.376	No	-1.209	0.0001	0.002	Yes
Ck-b-8-1	Ck-beta-8-1	-1.04	0.3911	0.835	No	-1.02	0.6566	0.945	No	-1.034	0.5097	0.944	No	-1.235	0.0057	0.06	Yes
MPIF-1	C-C motif chemokine 23	-1.012	0.7801	0.966	No	-1.018	0.6681	0.945	No	-1.045	0.3348	0.931	No	-1.183	0.0114	0.09	Yes
VEGF sR3	Vascular endothelial growth factor receptor 3	-1.063	0.0974	0.595	No	-1.113	0.0068	0.161	No	-1.137	0.0078	0.202	No	-1.255	0	0.001	Yes
Factor D	Complement factor D	1.015	0.3504	0.814	No	1.01	0.7146	0.955	No	1.054	0.0211	0.376	No	1.103	0.0002	0.005	Yes
HCC-1	C-C motif chemokine 14	-1.06	0.2565	0.743	No	-1.136	0.0109	0.195	No	-1.113	0.0228	0.381	No	-1.311	0	0.001	Yes
MMP-17	Matrix metalloproteinase-17	1.055	0.1881	0.677	No	1.076	0.0493	0.418	No	1.103	0.036	0.46	No	1.223	0.0006	0.011	Yes
Protein disulfide isomerase A3	Protein disulfide-isomerase A3	1.045	0.4838	0.883	No	1.001	0.9771	0.993	No	-1.077	0.2492	0.886	No	1.188	0.0132	0.098	Yes
Caspase-10	Caspase-10	-1.009	0.7407	0.965	No	-1.008	0.7068	0.95	No	-1.03	0.216	0.861	No	-1.089	0.0063	0.065	Yes
SARP-2	Secreted frizzled-related protein 1	-1.079	0.0513	0.509	No	-1.042	0.2271	0.718	No	1.113	0.0073	0.197	No	1.202	0.0004	0.008	Yes
ERBB4	Receptor tyrosine-protein kinase erbB-4	-1.052	0.1578	0.659	No	-1.073	0.0271	0.325	No	-1.092	0.0419	0.491	No	-1.155	0.0107	0.088	Yes
gp130, soluble	Interleukin-6 receptor subunit beta	-1.013	0.6025	0.92	No	-1.017	0.4219	0.849	No	-1.019	0.4629	0.943	No	-1.099	0.0018	0.025	Yes
HPG-	15-hydroxyprostaglandin dehydrogenase [NAD(+)]	1.002	0.9437	0.992	No	1.043	0.0789	0.494	No	-1.03	0.3074	0.922	No	1.088	0.0117	0.091	Yes
BDNF	Brain-derived neurotrophic factor	1.088	0.0562	0.509	No	1.047	0.2387	0.742	No	1.109	0.0544	0.572	No	1.237	0.0021	0.028	Yes
Ubiquitin	Ubiquitin	1.018	0.6965	0.943	No	1.125	0.0393	0.378	No	-1.02	0.6943	0.964	No	1.197	0.0074	0.072	Yes
TrATPase	Tartrate-resistant acid phosphatase type 5	-1.012	0.7748	0.966	No	-1.001	0.9806	0.994	No	1.11	0.016	0.315	No	1.188	0.0027	0.034	Yes
Dtk	Tyrosine-protein kinase receptor TYRO3	1.028	0.509	0.883	No	1.027	0.3425	0.811	No	-1.024	0.4932	0.943	No	-1.103	0.0065	0.066	Yes
P-Cadherin	Cadherin-3	-1.022	0.2582	0.743	No	1.013	0.5279	0.888	No	1.014	0.5254	0.944	No	-1.086	0.0072	0.07	Yes
BAFF	Tumor necrosis factor ligand superfamily member 13B	-1.033	0.5103	0.883	No	-1.011	0.7804	0.97	No	-1.021	0.6682	0.964	No	-1.168	0.013	0.097	Yes
GDF-11	Growth/differentiation factor 11	1.036	0.181	0.674	No	1.026	0.255	0.752	No	1.031	0.242	0.886	No	1.155	0.0002	0.005	Yes
SCGF-beta	Stem Cell Growth Factor-beta	-1.005	0.8906	0.986	No	-1.001	0.9697	0.992	No	1.127	0.006	0.188	No	1.394	0	0	Yes
SCGF-alpha	Stem Cell Growth Factor-alpha	-1.003	0.9333	0.988	No	-1.005	0.9082	0.991	No	1.149	0.0065	0.188	No	1.453	0	0	Yes
Coagulation Factor IXab	Coagulation factor IXab	-1.009	0.5962	0.92	No	1.013	0.4308	0.853	No	-1.051	0.0088	0.207	No	-1.1	0.0004	0.008	Yes
Heparin cofactor II	Heparin cofactor 2	-1.059	0.0701	0.547	No	-1.023	0.4703	0.866	No	-1.095	0.0088	0.207	No	-1.213	0.0002	0.005	Yes
amyloid precursor protein	Amyloid beta A4 protein	1.123	0.0565	0.509	No	1.082	0.1436	0.646	No	1.12	0.1805	0.809	No	1.284	0.0081	0.075	Yes
DAF	Complement decay-accelerating factor	1.003	0.9142	0.986	No	-1.001	0.9665	0.992	No	-1.015	0.5615	0.951	No	-1.079	0.0069	0.068	Yes
IL-1 R AcP	Interleukin-1 Receptor accessory protein	-1.012	0.7463	0.965	No	-1.02	0.5478	0.894	No	-1.051	0.1676	0.8	No	-1.121	0.0092	0.081	Yes
Flt-3	Receptor-type tyrosine-protein kinase FLT3	1.083	0.2721	0.745	No	1.138	0.0378	0.378	No	-1.03	0.7003	0.964	No	1.239	0.0076	0.073	Yes
CTAP-III	Connective tissue-activating peptide III	1.102	0.128	0.654	No	1.001	0.9839	0.994	No	1.063	0.5189	0.944	No	1.26	0.011	0.088	Yes
ERAB	3-hydroxyacyl-CoA dehydrogenase type-2	1.298	0.021	0.406	No	1.157	0.1162	0.601	No	1.086	0.4261	0.941	No	1.43	0.0014	0.02	Yes
Nectin-like protein 2	Cell adhesion molecule 1	-1.064	0.0915	0.588	No	-1.015	0.6334	0.945	No	-1.081	0.0431	0.5	No	-1.195	0.0004	0.009	Yes
B7-H1	Programmed cell death 1 ligand 1	1.01	0.8866	0.986	No	-1.011	0.8319	0.991	No	-1.048	0.3495	0.931	No	-1.161	0.0077	0.073	Yes
B7-H2	ICOS ligand	-1.006	0.9308	0.988	No	1.012	0.8467	0.991	No	1.017	0.8027	0.985	No	1.253	0.0113	0.089	Yes
HTRA2	Serine protease HTRA2, mitochondrial	1.09	0.0598	0.51	No	1.112	0.0057	0.153	No	1.019	0.6435	0.964	No	1.166	0.0029	0.035	Yes
DR6	Tumor necrosis factor receptor superfamily member 21	-1.013	0.6507	0.939	No	-1.042	0.1265	0.615	No	-1.075	0.0398	0.479	No	-1.237	0	0.001	Yes
CNTFR alpha	Ciliary neurotrophic factor receptor subunit alpha	-1.001	0.9724	0.996	No	-1.025	0.4664	0.866	No	-1.051	0.2617	0.889	No	-1.199	0.0003	0.006	Yes
DAN	Neuroblastoma suppressor of tumorigenicity 1	1.045	0.1714	0.661	No	1.048	0.1012	0.558	No	1.114	0.0141	0.29	No	1.162	0.0055	0.058	Yes
Growth hormone receptor	Growth hormone receptor	1.021	0.6261	0.924	No	1.006	0.8636	0.991	No	-1.103	0.0062	0.188	No	-1.214	0.0001	0.004	Yes
IL-22BP	Interleukin-22 receptor subunit alpha-2	-1.129	0.0392	0.459	No	-1.09	0.0463	0.41	No	-1.114	0.0709	0.646	No	-1.268	0.0007	0.012	Yes
LSAMP	Limbic system-associated membrane protein	1.03	0.2422	0.728	No	1.007	0.748	0.966	No	1.005	0.8598	0.99	No	-1.105	0.0018	0.025	Yes
Nogo Receptor	Reticulon-4 receptor	-1.038	0.3556	0.82	No	-1.038	0.3178	0.803	No	-1.071	0.1401	0.779	No	-1.241	0.0004	0.008	Yes
Siglec-3	Myeloid cell surface antigen CD33	-1.093	0.2176	0.718	No	-1.102	0.2216	0.717	No	-1.149	0.0807	0.687	No	-1.342	0.0006	0.01	Yes
Apo D	Apolipoprotein D	-1	0.9885	0.998	No	1.07	0.0096	0.178	No	1.026	0.3065	0.922	No	1.081	0.0021	0.028	Yes
Arylsulfatase A	Arylsulfatase A	1.009	0.8635	0.981	No	1.034	0.3623	0.818	No	1.053	0.182	0.809	No	1.116	0.008	0.075	Yes
Notch 1	Neurogenic locus notch homolog protein 1	-1.028	0.2156	0.716	No	-1.03	0.0842	0.509	No	-1.039	0.0719	0.647	No	-1.14	0	0	Yes
Cyclophilin F	Peptidyl-prolyl cis-trans isomerase F, mitochondrial	1.181	0.1055	0.612	No	1.182	0.056	0.424	No	1.027	0.8061	0.985	No	1.572	0.0001	0.002	Yes
PIGR	Polymeric immunoglobulin receptor	-1.023	0.7719	0.966	No	-1.002	0.9744	0.993	No	-1.199	0.0392	0.479	No	-1.338	0.0092	0.081	Yes
DnaJ homolog	Mitochondrial import inner membrane translocase subunit TIM14	1.103	0.0144	0.406	No	1.084	0.0546	0.42	No	1.071	0.1382	0.779	No	1.172	0.0068	0.068	Yes
YES	Tyrosine-protein kinase Yes	1.04	0.3888	0.835	No	1.081	0.0401	0.382	No	-1.005	0.9192	0.99	No	1.201	0.0007	0.012	Yes
Esterase D	S-formylglutathione hydrolase	1.016	0.7838	0.967	No	1.064	0.2712	0.766	No	1.001	0.9864	0.994	No	1.18	0.0125	0.096	Yes
GP1BA	Platelet glycoprotein Ib alpha chain	-1.049	0.139	0.654	No	-1.078	0.0039	0.112	No	-1.111	0.0028	0.141	No	-1.192	0.0001	0.004	Yes
EPHB2	Ephrin type-B receptor 2	-1.066	0.0533	0.509	No	-1.049	0.091	0.528	No	1.005	0.8632	0.99	No	-1.124	0.0097	0.084	Yes
TSP2	Thrombospondin-2	-1.091	0.0949	0.593	No	-1.025	0.5541	0.9	No	1.124	0.024	0.391	No	1.319	0.001	0.016	Yes
JAG1	Protein jagged-1	-1.004	0.8863	0.986	No	-1.019	0.4244	0.849	No	-1.041	0.1443	0.779	No	-1.114	0.0011	0.017	Yes
ARGI1	Arginase-1	-1.009	0.666	0.939	No	-1.003	0.8577	0.991	No	-1.013	0.5833	0.955	No	-1.09	0.0042	0.047	Yes
3HIDH	3-hydroxyisobutyrate dehydrogenase, mitochondrial	-1.038	0.598	0.92	No	-1.049	0.4093	0.845	No	-1.102	0.0955	0.72	No	-1.251	0.0025	0.032	Yes
EphB6	Ephrin type-B receptor 6	1	0.9884	0.998	No	-1.031	0.2006	0.711	No	-1.027	0.3374	0.931	No	-1.128	0.0012	0.018	Yes
NRX3B	Neurexin-3-beta	1.044	0.1936	0.685	No	-1.017	0.5968	0.924	No	-1.025	0.5158	0.944	No	-1.154	0.0012	0.018	Yes
PGCB	Brevican core protein	1.009	0.8238	0.973	No	1.012	0.7566	0.966	No	1.057	0.1245	0.779	No	1.165	0.0005	0.009	Yes
FSTL3	Follistatin-related protein 3	-1.067	0.0757	0.557	No	1.021	0.6217	0.939	No	1.159	0.0094	0.216	No	1.323	0	0.001	Yes
FN1.3	Fibronectin Fragment 3	1.167	0.0051	0.303	No	1.142	0.0081	0.165	No	1.138	0.0134	0.29	No	1.576	0	0	Yes
Testican-1	Testican-1	1.045	0.1309	0.654	No	1.048	0.0644	0.439	No	-1.006	0.853	0.99	No	1.087	0.0094	0.082	Yes
Endocan	Endothelial cell-specific molecule 1	-1.028	0.4056	0.845	No	-1.004	0.9021	0.991	No	1.053	0.1796	0.809	No	1.172	0.0021	0.028	Yes
LRIG3	Leucine-rich repeats and immunoglobulin-like domains protein 3	-1.065	0.0223	0.406	No	-1.05	0.0485	0.417	No	-1.041	0.1616	0.8	No	-1.12	0.011	0.088	Yes
CDK2/cyclin A	Cyclin-dependent kinase 2:Cyclin-A2 complex	-1.042	0.1239	0.654	No	-1.045	0.1148	0.601	No	-1.056	0.1288	0.779	No	-1.152	0.0077	0.073	Yes
PAK7	Serine/threonine-protein kinase PAK 7	1.124	0.031	0.406	No	1.098	0.0412	0.389	No	1.008	0.8555	0.99	No	1.172	0.009	0.081	Yes
PRKACA	cAMP-dependent protein kinase catalytic subunit alpha	-1.081	0.5282	0.897	No	-1.071	0.4199	0.849	No	-1.118	0.2839	0.905	No	1.349	0.0101	0.085	Yes
Protein 4.1	Protein 4.1	1.143	0.0537	0.509	No	1.08	0.2235	0.717	No	-1.025	0.6856	0.964	No	1.295	0.0025	0.032	Yes
IMB1	Importin subunit beta-1	1.166	0.0526	0.509	No	1.136	0.0483	0.417	No	-1.028	0.7069	0.967	No	1.271	0.0065	0.066	Yes
EP15R	Epidermal growth factor receptor substrate 15-like 1	1.054	0.2917	0.769	No	1.001	0.9819	0.994	No	-1.02	0.6842	0.964	No	1.198	0.0106	0.088	Yes
ASM3A	Acid sphingomyelinase-like phosphodiesterase 3a	1.042	0.2713	0.745	No	1.096	0.0064	0.161	No	1.037	0.2966	0.918	No	1.191	0.0002	0.005	Yes
HDGR2	Hepatoma-derived growth factor-related protein 2	1.02	0.5715	0.915	No	1.035	0.2031	0.711	No	1.063	0.0938	0.72	No	1.119	0.0052	0.056	Yes
CONA1	Collagen alpha-1(XXIII) chain	1.224	0.0494	0.509	No	1.204	0.022	0.282	No	1.084	0.3848	0.931	No	1.435	0.0003	0.006	Yes
NLGNX	Neuroligin-4, X-linked	-1.038	0.4336	0.861	No	1.008	0.8533	0.991	No	1.162	0.006	0.188	No	1.333	0	0.001	Yes
MO2R1	Cell surface glycoprotein CD200 receptor 1	-1.022	0.5746	0.918	No	-1.05	0.1473	0.646	No	-1.096	0.0247	0.395	No	-1.219	0.0001	0.002	Yes
PDE11	Dual 3',5'-cyclic-AMP and -GMP phosphodiesterase 11A	1.152	0.027	0.406	No	1.14	0.0082	0.165	No	1.002	0.975	0.991	No	1.254	0.0005	0.01	Yes
Kininogen, HMW	Kininogen-1	-1.059	0.0612	0.514	No	-1.086	0.0042	0.115	No	-1.117	0.0025	0.131	No	-1.194	0	0.001	Yes
TLR4:MD-2 complex	Toll-like receptor 4:Lymphocyte antigen 96 complex	-1.048	0.1538	0.659	No	-1.033	0.2135	0.717	No	-1.08	0.0227	0.381	No	-1.156	0.0002	0.005	Yes
